# Supplementary material for: Analysis of conserved miRNAs in cynomolgus macaque genome using small RNA sequencing and homology searching
Source: PeerJ. 2020 Jul 10;8:e9347. doi: 10.7717/peerj.9347 (PMC7357559; doi:10.7717/peerj.9347)
Supplement: Supplemental Information 1 — °: underlined names indicate antisense miRNAs; MFE: minimal folding free energy; Category of age: The ages of the miRNAs were assessed based on the set of homologous sequences identified in other vertebrate species in miRBase. Vertebrates, Mammals, Primates and Cercopithecidae mean the miRNA homologous sequences were shared among Vertebrates, Mammals, Primates and Cercopithecidae, respectively. † : a: reported in cynomolgus macaques previously; b: annotated as miRNAs in other species; c: miRNA homologies in other species having experimental support. [file peerj-08-9347-s001.xlsx]

## Sheet: Supplemental Table S1
Supplemental Table S1. M. fascicularis pre-miRNA gene loci identified by homology searching
names º	pre-sequences	structure	gene locations	gene mapping types	homology similarity	mismatches in mature sequences	MFE (kcal/mol)	supported by RNA-seq	Family name	Category of age	supporting information †		mdd	confirmed_type	match_ratio	分类（A, 5p or 3p 0 mis）	是否测出合并	family ID	保守类别	novel	pre-sequences	gene locations	gene mapping types
mir-6128	AAGAAGCTTGTAGATTTTTCTCCCTTACTATCTAGAATTATAGGACTTCAGTCCATGATTTGGAAAAATTACTGGAATTGGAGTCAAAAATAATTTGAAAATTAGGAAT	...........(((....))).(((.........(((((((..((((((((((((((((((....)))))).))).)))))))))....))))))).......)))...	chr1 + 599496 599605	intron	100	0	-22.5	no	mir-6128	Primates	a, b		mir-6128	intron	100	A	0	mir-6128	Primates	Ref1	AAGAAGCTTGTAGATTTTTCTCCCTTACTATCTAGAATTATAGGACTTCAGTCCATGATTTGGAAAAATTACTGGAATTGGAGTCAAAAATAATTTGAAAATTAGGAAT	chr1 + 599496 599605	intron
mir-3916	CTGAGAAGGAATCCCAGAGAAGAAGGAAGAAGAGGAAGAAATGGCTGGTTCTCAGGTGAATGTGTCTGGGTTCAGGGGATGTGTCCTCTTTTCTTCTGGGACGTTATGTGTTTA	...........(((((((......((((((.(((((........((((..((((((........)))))).))))........)))))))))))))))))).............	chr1 + 2070810 2070924	space	96.81	0	-31.6	no		Primates	a, b		mir-3916	space	96.81	A	0		Primates	Ref2	ATCCCAGAGAAGAAGGAAGAAGAGGAAGAAATGGCTGGTTCTCAGGTGAATGTGTCTGGGTTCAGGGGATGTGTCCTCTTTTCTTCTGGGAC	chr1 + 2070820 2070914	space
mir-7180	AGTGTACTTCCTGAGGCCTCTGGGTATAAAATTCCTGTGGCCTCTGGGTGTGTACCCT	.((((((.(((.((((((.(.(((........))).).)))))).))).))))))...	chr1 - 4358800 4358858	intron	100	0	-23.9	yes	mir-7180	Mammals	a, b		mir-7180	intron	100	A	1	mir-7180	Mammalia	Ref1	AGTGTACTTCCTGAGGCCTCTGGGTATAAAATTCCTGTGGCCTCTGGGTGTGTACCCT	chr1 - 4358800 4358858	intron
mir-4677	GCAAAGCAGCAATTGTTCTTTGGTCTTTCAGCCATGACCTGACCTTCTGTCTGTGAGACCAAAGAACTACTTTGCTTGGC	((.((((((.....(((((((((((((.(((.((.((........)))).))).)))))))))))))....)))))).))	chr1 - 6134590 6134670	intron	100	0	-31.5	yes	mir-4677	Primates	a, b		mir-4677	intron	100	A	1	mir-4677	Primates	Ref1	GCAAAGCAGCAATTGTTCTTTGGTCTTTCAGCCATGACCTGACCTTCTGTCTGTGAGACCAAAGAACTACTTTGCTTGGC	chr1 - 6134590 6134670	intron
mir-622	GAGAGGAGCTGGACAAGTACTGGTCTCAGCAGATTGAGGACAGCACCGCAGTGGTCACCACGCAGTCCGCCGAGGTTGGAGCTGCTGAATCGATG	.......(((((((........))).)))).((((.((..(((((((.(.((((.(........).)))).).)))....)))))).))))....	chr1 - 10990591 10990686	space	94.57	2	-27.3	no	mir-622	Primates	a		mir-622	space	94.57	C	0	mir-622	Primates	Ref1	GAGAGGAGCTGGACAAGTACTGGTCTCAGCAGATTGAGGACAGCACCGCAGTGGTCACCACGCAGTCCGCCGAGGTTGGAGCTGCTGAATCGATG	chr1 - 10990591 10990686	space
mir-4428	AATCTTAGGCAAATGGGCTTTCCACTTGGCAGGTGCCATGTCGCCTGCTTCTTACTGTACGCGTGGCTGGCAAGGAGACGGGAACATGAAGCCGCCATTTTGAACATGCCTAG	.....((((((..((..(........((((.(((..(((((..((((((((((.((((.......)).)).)))))).)))).)))))..)))))))....)..)))))))).	chr1 - 12018823 12018936	intron	94.69	1	-35.4	no	mir-4428	Primates	b		mir-4428	intron	94.69	B	0	mir-4428	Primates		AATCTTAGGCAAATGGGCTTTCCACTTGGCAGGTGCCATGTCGCCTGCTTCTTACTGTACGCGTGGCTGGCAAGGAGACGGGAACATGAAGCCGCCATTTTGAACATGCCTAG	chr1 - 12018823 12018936	intron
mir-4671	TGTTTTAAGACCGAAGACTGTGCACTAATCTCTTAGCACTGAAGATTAGTGCATAGTCTTTGGTCTCAAAATA	((((((.(((((((((((((((((((((((((........).)))))))))))))))))))))))).))))))	chr1 - 15245500 15245573	intron	97.26	0	-42.4	no		Primates	b		mir-4671	intron	97.26	A	0		Primates		TGTTTTAAGACCGAAGACTGTGCACTAATCTCTTAGCACTGAAGATTAGTGCATAGTCTTTGGTCTCAAAATA	chr1 - 15245500 15245573	intron
mir-4427	CCAGTCCCCTATTCACTCTGCTTCACTGAAGCCTCTTGGGGCTTATTCGGTCACCGGTTTCATCATTTCATCATTTCATCTGAATAGAGTCTGAAGAGTCTTTAGTGGAAGTATGCAC	..................(((((((((((((.(((((.((((((((((((.............................)))))).)))))).))))).))))))).)))))).....	chr1 - 15940543 15940661	intron	95.45	0	-33.4	no	mir-4427	Primates	b		mir-4427	intron	95.45	A	0	mir-4427	Primates		CCAGTCCCCTATTCACTCTGCTTCACTGAAGCCTCTTGGGGCTTATTCGGTCACCGGTTTCATCATTTCATCATTTCATCTGAATAGAGTCTGAAGAGTCTTTAGTGGAAGTATGCAC	chr1 - 15940543 15940661	intron
mir-1182	GGGACTTGTCACTGCCTGTCTCCTCCCTCTCCAGCGGCGACTGGATTCTGGAGTCCATCTAGAGGGTCTTGGGAGGGATGTGACTGTTGGGAAGCCC	(((.(((.(((..((..(((.(.((((((.((((....((((...(((((((.....))))))))))))))))))))).).))).))))).))))))	chr1 + 18542612 18542709	overlap	98.97	0	-37.7	no	mir-1182	Primates	a, b		mir-1182	overlap	98.97	A	0	mir-1182	Primates	Ref2	GGGACTTGTCACTGCCTGTCTCCTCCCTCTCCAGCGGCGACTGGATTCTGGAGTCCATCTAGAGGGTCTTGGGAGGGATGTGACTGTTGGGAAGCCC	chr1 + 18542612 18542709	overlap
mir-7177	TCAGGACACCAGAGAACCATAGAGCGAATTACTTCTTCCAGAGTGCTAAATGATCCCCTGGTGCCCTGGAA	(((((.((((((.(...(((..(((.....((((......)))))))..)))...).)))))).)))))..	chr1 + 22636239 22636310	intron	100	0	-21.1	no	mir-7177	Mammals	a, b		mir-7177	intron	100	A	0	mir-7177	Mammalia	Ref1	TCAGGACACCAGAGAACCATAGAGCGAATTACTTCTTCCAGAGTGCTAAATGATCCCCTGGTGCCCTGGAA	chr1 + 22636239 22636310	intron
mir-1255b	CTTCACTAGGAGTTGCTTCTTACGGATAAGCAAAGAAAGTGGTTTGAGCCTCAGGAAACCACTTTCTTTGCTCATCTGTAAGGAGCAACTCCTTATCTGTTCAAGTTTTATC	.......((((((((((((((((((((.(((((((((((((((((..........))))))))))))))))).))))))))))))))))))))...................	chr1 + 25960396 25960508	intron	100	0	-59.4	yes	mir-1255	Mammals	a, b		mir-1255b	intron	100	A	1	mir-1255	Mammalia	Ref1 Ref2	CTTCACTAGGAGTTGCTTCTTACGGATAAGCAAAGAAAGTGGTTTGAGCCTCAGGAAACCACTTTCTTTGCTCATCTGTAAGGAGCAACTCCTTATCTGTTCAAGTTTTATC	chr1 + 25960396 25960508	intron
mir-3119-1	ATTAACTCTAGCTTTTAATTTTGATGGCAAAGGTGTAGCTAAACAATCTATGTCTTTGCCATCAAAGTTAAAAGCCAGAGTTAAT	(((((((((.((((((((((((((((((((((((((((.........)))))))))))))))))))))))))))).)))))))))	chr1 - 28099966 28100051	space	95.29	2	-44.7	no	mir-3119	Primates	b, c		mir-3119-1	space	95.29	C	0	mir-3119	Primates	anotation	ATTAACTCTAGCTTTTAATTTTGATGGCAAAGGTGTAGCTAAACAATCTATGTCTTTGCCATCAAAGTTAAAAGCCAGAGTTAAT	chr1 - 28099966 28100051	space
mir-3119-2	ATTAACTCTGGCTTTTAACTTTGATGGCAAAGACATAGATTGTTTAGCTACACCTTTGCCATCAAAATTAAAAGCTAGAGTTAAT	((((((((((((((((((.(((((((((((((...(((.........)))...))))))))))))).))))))))))))))))))	chr1 + 28099966 28100051	intron	95.29	0	-41.9	no	mir-3119	Primates	b, c		mir-3119-2	intron	95.29	A	0	mir-3119	Primates	anotation	ATTAACTCTGGCTTTTAACTTTGATGGCAAAGACATAGATTGTTTAGCTACACCTTTGCCATCAAAATTAAAAGCTAGAGTTAAT	chr1 + 28099966 28100051	intron
mir-703	TAAAACCTTCAGAAGGAAAGGAGAATGTCTTGTGGACCACTTTGGTTTTCTTTTTTGCGTGTGACAGTTTTA	((((((..(((.(.(.(((((((((.........(((((...)))))))))))))).).).)))..))))))	chr1 - 28732440 28732512	space	96.88	0	-16.2	no	mir-703	Vertebrates	b		mir-703	space	96.88	A	0	mir-703	Vertebrata		TAAAACCTTCAGAAGGAAAGGAGAATGTCTTGTGGACCACTTTGGTTTTCTTTTTTGCGTGTGACAGTTTTA	chr1 - 28732440 28732512	space
mir-1295a	AGGGCATTTTACCCAGATCCGTGGCCTAATCAGAAATGTGGCCTGTGATTAGGCCACAGATCTGGGTGAAATGTCCTCC	(((((((((((((((((((.((((((((((((.(.........).)))))))))))).)))))))))))))))))))..	chr1 - 29055294 29055373	space	96.2	1	-53.7	no	mir-1295	Primates	b, c		mir-1295a	space	96.2	B	0	mir-1295	Primates	anotation	AGGGCATTTTACCCAGATCCGTGGCCTAATCAGAAATGTGGCCTGTGATTAGGCCACAGATCTGGGTGAAATGTCCTCC	chr1 - 29055294 29055373	space
mir-7178	TAGGAGCTATCAGAACTTAGTGATCAAGTGAAGTCGTAGTTACTAATTTCTGATGCTCTTCCC	.((((((.(((((((.((((((((...(......)...)))))))).)))))))))))))...	chr1 + 29578947 29579010	intron	100	0	-22.7	no		Cercopithecidae	a, b		mir-7178	intron	100	A	0		Cercopithecidae	Ref1	TAGGAGCTATCAGAACTTAGTGATCAAGTGAAGTCGTAGTTACTAATTTCTGATGCTCTTCCC	chr1 + 29578947 29579010	intron
mir-214	GGCCTGGCTGGACAGAGTTGTCATGTGTCTGCCTGTCTACACTTGCTGTGCAGAACATCCGCTCACCTGTACAGCAGGCACAGACAGGCAGTCACATGACAACCCAGCCT	.....((((((.....(((((((((((.((((((((((...((((((((((((.............))))))))))))...)))))))))).))))))))))))))))).	chr1 - 30111736 30111846	space	100	0	-67.5	yes	mir-214	Vertebrates	a, b		mir-214	space	100	A	1	mir-214	Vertebrata	Ref1 Ref2	GGCCTGGCTGGACAGAGTTGTCATGTGTCTGCCTGTCTACACTTGCTGTGCAGAACATCCGCTCACCTGTACAGCAGGCACAGACAGGCAGTCACATGACAACCCAGCCT	chr1 - 30111736 30111846	space
mir-3120	GGCTGGGTTGTCATGTGACTGCCTGTCTGTGCCTGCTGTACAGGTGAGCGGATGTTCTGCACAGCAAGTGTAGACAGGCAGACACATGACAACTCTGTCCAGCC	(((((((((((((((((.((((((((((((((.((((((.((((...........)))).)))))).)))))))))))))).))))))))))).....))))))	chr1 + 30111737 30111841	intron	100	0	-62.1	yes	mir-214	Vertebrates	b, c		mir-3120	intron	100	A	1	mir-214	Vertebrata	anotation	GGCTGGGTTGTCATGTGACTGCCTGTCTGTGCCTGCTGTACAGGTGAGCGGATGTTCTGCACAGCAAGTGTAGACAGGCAGACACATGACAACTCTGTCCAGCC	chr1 + 30111737 30111841	intron
mir-199a-2	AGGAAGCTTCTGGAGATCCTGCTCCGTCGCCCCAGTGTTCAGACTACCTGTTCAGGACAATGCCGTTGTACAGTAGTCTGCACATTGGTTAGACTGGGCAAGGGAGAGCA	.....(((.((.....((((((((.(((...(((((((.((((((((.(((.((((......))..)).))))))))))).)))))))...))).)))).))))))))).	chr1 - 30117466 30117576	space	100	0	-42.3	yes	mir-199	Vertebrates	a, b		mir-199a-2	space	100	A	5	mir-199	Vertebrata	Ref1	AGGAAGCTTCTGGAGATCCTGCTCCGTCGCCCCAGTGTTCAGACTACCTGTTCAGGACAATGCCGTTGTACAGTAGTCTGCACATTGGTTAGACTGGGCAAGGGAGAGCA	chr1 - 30117466 30117576	space
mir-1843	TATGGAGGTCTCTGTCTGGCTTAGGACAGCTGGCTAAGTCTGATCGTTCCCCTCCATACA	((((((((...(.(((.(((((((.........))))))).))).)....))))))))..	chr1 - 33941013 33941073	intron	96.67	1	-21.9	yes	mir-1843	Mammals	b		mir-1843	intron	96.67	B	2	mir-1843	Mammalia	novel	TATGGAGGTCTCTGTCTGGCTTAGGACAGCTGGCTAAGTCTGATCGTTCCCCTCCATACA	chr1 - 33941013 33941073	intron
mir-488	GAGAATCATCTCTCCCAGATAATGGCACTCTCAAACAAGTTTCCAAGTTGTTTGAAAGGCTATTTCTTGGTCAGATGACTCTC	((((.((((((..((.(((.((((((.((.((((((((.((...)).)))))))).))))))))))).))..)))))).))))	chr1 - 34991248 34991331	intron	100	0	-33.1	no	mir-488	Mammals	a, b		mir-488	intron	100	A	0	mir-488	Mammalia	Ref1	GAGAATCATCTCTCCCAGATAATGGCACTCTCAAACAAGTTTCCAAGTTGTTTGAAAGGCTATTTCTTGGTCAGATGACTCTC	chr1 - 34991248 34991331	intron
mir-181b-1	CCTGTGCAGAGATTATTTTTTAAAAGGTCACAATCAACATTCATTGCTGTCGGTGGGTTGAACTGTGTAGACAAGCTCACTGAACAATGAATGCAACTGTGGCCCCGCTT	.........................(((((((.....(((((((((...((((((((((....(((....))))))))))))).)))))))))....)))))))......	chr1 - 57185008 57185118	space	100	0	-33.2	yes	mir-181	Vertebrates	a, b		mir-181b-1	space	100	A	1	mir-181	Vertebrata	Ref1	CCTGTGCAGAGATTATTTTTTAAAAGGTCACAATCAACATTCATTGCTGTCGGTGGGTTGAACTGTGTAGACAAGCTCACTGAACAATGAATGCAACTGTGGCCCCGCTT	chr1 - 57185008 57185118	space
mir-181a-1	TGAGTTTTGAGGTTGCTTCAGTGAACATTCAACGCTGTCGGTGAGTTTGGAATTAAAATCAAAACCATCGACCGTTGATTGTACCCTATGGCTAACCATCATCTACTCCA	.((((..((((((((((..((.(.(((.((((((..(((((((.((((.((.......)).))))))))))))))))).))).).))..))).)))).)))...))))..	chr1 - 57185179 57185289	space	100	0	-35.9	yes	mir-181	Vertebrates	a, b		mir-181a-1	space	100	A	1	mir-181	Vertebrata	Ref1	TGAGTTTTGAGGTTGCTTCAGTGAACATTCAACGCTGTCGGTGAGTTTGGAATTAAAATCAAAACCATCGACCGTTGATTGTACCCTATGGCTAACCATCATCTACTCCA	chr1 - 57185179 57185289	space
mir-548aw	TAGGTCGGTGCAATAGTCATCGCGGTTTTTGCCATTACAAGATGGCAAAAACCGCGATGACTTTTGCACCAACCTA	(((((.(((((((.((((((((((((((((((((((....)))))))))))))))))))))).))))))).)))))	chr1 - 57954513 57954589	space	93.85	2	-57.5	no	mir-548	Primates	b		mir-548aw	space	93.85	C	0	mir-548	Primates		TAGGTCGGTGCAATAGTCATCGCGGTTTTTGCCATTACAAGATGGCAAAAACCGCGATGACTTTTGCACCAACCTA	chr1 - 57954513 57954589	space
mir-5191	AGTTGGCCAGGACCTCAAGCCCCTAGCACTTCATTCTTGCTGTCCTCTCCTAGTCTGAGAAGATAGAAGAGAGGATAGGAAGAATGAAGTGCTGGGGGCTTAGGGGGATCCTGGCCCACT	(((.((((((((((((((((((((((((((((((((((.((((((((((...((((....))))....)))))))))).))))))))))))))))))))))..)))).)))))))).)))	chr1 + 60081351 60081471	intron	94.17	0	-87.6	no		Primates	b, c		mir-5191	intron	94.17	A	0		Primates	anotation	AGTTGGCCAGGACCTCAAGCCCCTAGCACTTCATTCTTGCTGTCCTCTCCTAGTCTGAGAAGATAGAAGAGAGGATAGGAAGAATGAAGTGCTGGGGGCTTAGGGGGATCCTGGCCCACT	chr1 + 60081351 60081471	intron
mir-6739	GAATGTGGGAAAGAGAAAGGACAAGTAATAGGAATTTTCATTTTCCAGCCCCTAATTGCTCTGTCTTTCTCCCAG	.....(((((....(((((.((((((((((((..................))).)))))).))))))))))))).	chr1 + 60240551 60240626	intron	96	1	-18.5	no		Primates	b, c		mir-6739	intron	96	B	0		Primates	anotation	GAATGTGGGAAAGAGAAAGGACAAGTAATAGGAATTTTCATTTTCCAGCCCCTAATTGCTCTGTCTTTCTCCCAG	chr1 + 60240551 60240626	intron
mir-6740	GAAAGAGTTTGGGATGGAGTGAGGAGAAACCTGAGGTCTCTGGGAGTTGCTTGAGTTGCTTGAACCAACTGATAGTAACCTGGCCAGAGAATTCTGATAGTATCTTCTCTCCTTCTCCCAAACAG	......((((((((.((((.(((((((.((..(((.(((((((..(((((((.(((((.......))))).).))))))....))))))).))).....)).)))))))..))))))))))))..	chr1 + 60386223 60386348	intron	93.81	1	-48.9	no		Primates	b		mir-6740	intron	93.81	B	0		Primates		GAAAGAGTTTGGGATGGAGTGAGGAGAAACCTGAGGTCTCTGGGAGTTGCTTGAGTTGCTTGAACCAACTGATAGTAACCTGGCCAGAGAATTCTGATAGTATCTTCTCTCCTTCTCCCAAACAG	chr1 + 60386223 60386348	intron
mir-135b	CCCTCCACTCTGCTGTGGCCTATGGCTTTTCATTCCTATGTGATTGCTGTCCCAAACTCATGTAGGGCTAAAAGCCATGGGCTACAGTGAGGGGCGAGCTCCTTCTCCTGCAGC	(((((......(((((((((((((((((((...(((((((((((((......)))..))))))))))..))))))))))))))))))))))))(((((......)))..))...	chr1 - 63951571 63951685	intron	100	0	-51.3	yes	mir-135	Vertebrates	a, b		mir-135b	intron	100	A	5	mir-135	Vertebrata	Ref1	CCCTCCACTCTGCTGTGGCCTATGGCTTTTCATTCCTATGTGATTGCTGTCCCAAACTCATGTAGGGCTAAAAGCCATGGGCTACAGTGAGGGGCGAGCTCCTTCTCCTGCAGC	chr1 - 63951571 63951685	intron
mir-3556b-2	GCTGCTGCTTTTCCCCCTACATCATAACCGATTTCAAATGGTGCTAGACAAAAACAGACTCTGAACACCAGGAGAAATCGGTCAGCCTGTGTAAGAGATGGGCCAGT	((((..((((.((.(..(((((....(((((((((...(((((.((((...........))))..)))))...)))))))))......))))).).)).))))))))	chr1 + 66367829 66367936	space	98.13	0	-28.5	no	mir-3556	Mammals	b, c		mir-3556b-2	space	98.13	A	0	mir-3556	Mammalia	anotation	GCTGCTGCTTTTCCCCCTACATCATAACCGATTTCAAATGGTGCTAGACAAAAACAGACTCTGAACACCAGGAGAAATCGGTCAGCCTGTGTAAGAGATGGGCCAGT	chr1 + 66367829 66367936	space
mir-29c	GGGAGCACCACTGGCCCATCTCTTACACAGGCTGACCGATTTCTCCTGGTGTTCAGAGTCTGTTTTTGTCTAGCACCATTTGAAATCGGTTATGATGTAGGGGGAAAAGCAG	((.....)).(((.....(((((((((((...(((((((((((...(((((((.(((...........))))))))))...))))))))))))).))))))))).....)))	chr1 - 66367833 66367945	space	100	0	-39.1	yes	mir-29	Vertebrates	a, b		mir-29c	space	100	A	1	mir-29	Vertebrata	Ref1 Ref2	GGGAGCACCACTGGCCCATCTCTTACACAGGCTGACCGATTTCTCCTGGTGTTCAGAGTCTGTTTTTGTCTAGCACCATTTGAAATCGGTTATGATGTAGGGGGAAAAGCAG	chr1 - 66367833 66367945	space
mir-29b-2	TCTTCTTCTGGAAGCTGGTTTCACATGGTGGCTTAGATTTTTCCATCTTTGTATCTAGCACCATTTGAAATCAGTGTTTTAGGAGTAAGA	(((((((((((((((((((((((.((((((.((.((((..............)))))))))))).)))))))))).))))))))).))))	chr1 - 66368426 66368516	space	100	0	-34.6	yes	mir-29	Vertebrates	a, b		mir-29b-2	space	100	A	1	mir-29	Vertebrata	Ref1	TCTTCTTCTGGAAGCTGGTTTCACATGGTGGCTTAGATTTTTCCATCTTTGTATCTAGCACCATTTGAAATCAGTGTTTTAGGAGTAAGA	chr1 - 66368426 66368516	space
mir-205	AAAGATCCTCAGGCAATCCATGTGCTTCTCTTGTCCTTCATTCCACCGGAGTCTGTCTCATACCCAACCAGATTTCAGTGGAGTGAAGTTCAGGAGGCATGGAGCTGACG	........((((.(..(((((((....((((((..(((((((((((.((((((((.............)))))))).)))))))))))..))))))))))))))))))..	chr1 + 67985997 67986107	space	100	0	-46.2	no	mir-205	Vertebrates	a, b		mir-205	space	100	A	0	mir-205	Vertebrata	Ref1	AAAGATCCTCAGGCAATCCATGTGCTTCTCTTGTCCTTCATTCCACCGGAGTCTGTCTCATACCCAACCAGATTTCAGTGGAGTGAAGTTCAGGAGGCATGGAGCTGACG	chr1 + 67985997 67986107	space
mir-205b	ACTTCACTCCACTGAAATCTGGTTGGGTATGAGACAGACTCCGGTGGAATGAAGGACA	.(((((.(((((((...((((.............))))...))))))).)))))....	chr1 - 67986028 67986086	space	93.1	0	-20.3	no	mir-205	Vertebrates	b, c		mir-205b	space	93.1	A	0	mir-205	Vertebrata	anotation	ACTTCACTCCACTGAAATCTGGTTGGGTATGAGACAGACTCCGGTGGAATGAAGGACA	chr1 - 67986028 67986086	space
mir-4260	AACAAGGTGACTTGGGGCATGGAGTCCCACTTCCTGGAGCCCACACCCCAGCTTGTCACACACCAAC	......(((((((((((..(((..(((........)))..)))..))))))...)))))........	chr1 - 68181571 68181638	intron	100	0	-23.9	no		Primates	b, c		mir-4260	intron	100	A	0		Primates	anotation	AACAAGGTGACTTGGGGCATGGAGTCCCACTTCCTGGAGCCCACACCCCAGCTTGTCACACACCAAC	chr1 - 68181571 68181638	intron
mir-3122	AAAAGTTACTGACCAGCTCTGTTGGGACAAGAGAACGGTCTTGTTTTGGAAGGAAGACCGTCGTTTTGTCCCAAGAGAGCTGGTAGCATGTTTCGGAAATCTGCAAGTTTC	...........(((((((((.(((((((((((..((((((((.(((...))).))))))))..))))))))))).))))))))).(((.((((...)))).))).......	chr1 + 70656619 70656730	intron	100	0	-53.7	yes	mir-3122	Primates	a, b		mir-3122	intron	100	A	1	mir-3122	Primates	Ref1	AAAAGTTACTGACCAGCTCTGTTGGGACAAGAGAACGGTCTTGTTTTGGAAGGAAGACCGTCGTTTTGTCCCAAGAGAGCTGGTAGCATGTTTCGGAAATCTGCAAGTTTC	chr1 + 70656619 70656730	intron
mir-548h-2	GTATTTAGGTTGGTGCAAAAGTAATTGCGGTTTTTGTCATTACTTTTAATGGCAAAAACCACGATAACTTTTGCACCAACCTAATACAA	(((((.((((((((((((((((.((((.((((((((((((((....)))))))))))))).)))).)))))))))))))))))))))..	chr1 + 72320912 72321001	space	93.18	1	-52.9	no	mir-548	Primates	b		mir-548h-2	space	93.18	B	0	mir-548	Primates		GTATTTAGGTTGGTGCAAAAGTAATTGCGGTTTTTGTCATTACTTTTAATGGCAAAAACCACGATAACTTTTGCACCAACCTAATACAA	chr1 + 72320912 72321001	space
mir-215	ATCATTAAGAAATGGTATACAGGAAAATGACCTATGAATTGACAGACACTATAGCTGAGTTTGTCTGTCATTTCTTTAGGCCAATATTCTGTATGACTGTGCTACTTCAA	.......((..(((((((((((((...((.((((.(((.(((((((((..((......)).))))))))).)))..)))).))...)))))))).))))).)).......	chr1 - 78854733 78854843	space	100	0	-31.1	yes	mir-192	Vertebrates	a, b		mir-215	space	100	A	1	mir-192	Vertebrata	Ref1	ATCATTAAGAAATGGTATACAGGAAAATGACCTATGAATTGACAGACACTATAGCTGAGTTTGTCTGTCATTTCTTTAGGCCAATATTCTGTATGACTGTGCTACTTCAA	chr1 - 78854733 78854843	space
mir-194-1	ATGGTGTTATCAAGTGTAACAGCAACTCCATGTGGACTGTGTATCAATTTCCAGTGGAGATGCTGTTACTTTTGATGGTTACCAA	.(((((.(((((((.(((((((((.((((((.((((..((......)).)))))))))).))))))))).)))))))..))))).	chr1 - 78855040 78855125	space	98.82	0	-38.4	yes	mir-194	Vertebrates	a, b		mir-194-1	space	98.82	A	1	mir-194	Vertebrata	Ref1	ATGGTGTTATCAAGTGTAACAGCAACTCCATGTGGACTGTGTATCAATTTCCAGTGGAGATGCTGTTACTTTTGATGGTTACCAA	chr1 - 78855040 78855125	space
mir-664	CTGGCTAGGGAAAATGATTGGATAGAAAATGTTATTCTATTCATTTATCCCCAGCCTA	..((((.((((...(((.(((((((((.......))))))))).))))))).))))..	chr1 - 78937903 78937961	intron	100	0	-21.7	yes	mir-664	Mammals	a, b		mir-664	intron	100	A	1	mir-664	Mammalia	Ref1	CTGGCTAGGGAAAATGATTGGATAGAAAATGTTATTCTATTCATTTATCCCCAGCCTA	chr1 - 78937903 78937961	intron
mir-320b	GTTATTTTTAGTCTTCTACCTAAGAATTCTGTCTCTTAGGCTTTCTCTTCCCAGTTTTCCCAAAGTTGGGAAAAGCTGGGTTGAGAGGGTAAAAGGAAAAAGAAAAAAAA	...((((((((........))))))))(((...((((..((((((((..(((((((((((((....)))).)))))))))..))))))))...))))...))).......	chr1 - 82891346 82891456	intron	99.09	1	-39	yes	mir-320	Vertebrates	a, b		mir-320b	intron	99.09	B	1	mir-320	Vertebrata	Ref1	GTTATTTTTAGTCTTCTACCTAAGAATTCTGTCTCTTAGGCTTTCTCTTCCCAGTTTTCCCAAAGTTGGGAAAAGCTGGGTTGAGAGGGTAAAAGGAAAAAGAAAAAAAA	chr1 - 82891346 82891456	intron
mir-3620	GTGAGGTGGGGGCCAGCAGGGAGTGGGTTGGGCTGGACTGGGCCAAGGTACAAGGTCTCACCCTGCATCCTGCACCCAG	.((.((((.(((...((((((..((((...((((......))))............))))))))))..))).)))))).	chr1 + 86950221 86950300	intron	94.94	1	-30.3	yes		Mammals	b, c		mir-3620	intron	94.94	B	6		Mammalia	anotation	GTGAGGTGGGGGCCAGCAGGGAGTGGGTTGGGCTGGACTGGGCCAAGGTACAAGGTCTCACCCTGCATCCTGCACCCAG	chr1 + 86950221 86950300	intron
mir-4666a	ATCACTGAAATACATGTCAGATTGTATGCCTACAAAATCCCTCCAGACTGGCATACAATCTGAAATGTATTTAAGAGAT	(((.((.((((((((.((((((((((((((...................)))))))))))))).)))))))).)).)))	chr1 + 87314626 87314705	space	97.47	0	-31.4	no		Primates	b, c		mir-4666a	space	97.47	A	0		Primates	anotation	ATCACTGAAATACATGTCAGATTGTATGCCTACAAAATCCCTCCAGACTGGCATACAATCTGAAATGTATTTAAGAGAT	chr1 + 87314626 87314705	space
mir-4654	ATGGGATGGGGCTGGCCGGTCGTGGGATCTGGAGGCGTCTGGGGTTAGAATGTGACCCCAGTCTCCTTTTCCCTCATCATCTGCCAGCCCTTATGGCCCATGTGCCTCTTCCT	(((((..(((((((((.(((.(.((((...((((((...((((((((.....))))))))))))))...)))).)...))).))))))))).....)))))............	chr1 - 89576103 89576216	intron	94.69	1	-56.8	no	mir-4654	Primates	b, c		mir-4654	intron	94.69	B	0	mir-4654	Primates	anotation	ATGGGATGGGGCTGGCCGGTCGTGGGATCTGGAGGCGTCTGGGGTTAGAATGTGACCCCAGTCTCCTTTTCCCTCATCATCTGCCAGCCCTTATGGCCCATGTGCCTCTTCCT	chr1 - 89576103 89576216	intron
mir-5187	GATTAAGGGTGGGATAAGGGATTGAGGTGGAGCAGGAATGCGCTTTTCTCCACTGACTCCTCTTTCCTCAGGTGGC	.........((((..((((((....(((((((.((((......)))))))))))...))).)))..))))......	chr1 - 90424055 90424131	intron	93.42	2	-20.4	no		Primates	b		mir-5187	intron	93.42	C	0		Primates		GATTAAGGGTGGGATAAGGGATTGAGGTGGAGCAGGAATGCGCTTTTCTCCACTGACTCCTCTTTCCTCAGGTGG	chr1 - 90424055 90424131	intron
mir-765	TTTAGGGGCTGATGAAAGTGGAGTTCAGTAGACAACCCTTTTCAAGCCCTGCAAGAAACTGGGGTTTCTGGAGGAGAAGGAAGGTGCTGAAGGGGCTGCTCTCGTGAGCCTGAA	.....(((((.((((.(((((..(((((((......(((((((((((((((........))))))))......)))))))....)))))))....))))).)))).)))))...	chr1 + 94764726 94764840	intron	99.12	1	-39.9	no	mir-765	Primates	a		mir-765	intron	99.12	B	0	mir-765	Primates	Ref1	TTTAGGGGCTGATGAAAGTGGAGTTCAGTAGACAACCCTTTTCAAGCCCTGCAAGAAACTGGGGTTTCTGGAGGAGAAGGAAGGTGCTGAAGGGGCTGCTCTCGTGAGCCTGAA	chr1 + 94764726 94764840	intron
mir-9b-1	GCGCAGTGTATGGGGTTATTTTTACTTTCGGTTATCTAGCTTTATGAAGACTCCACACCACTCATACAGCTAGATAACCAAAGATAACAACCAACCCCGCCTCCTGGC	((.(((....(((((((....(((((((.((((((((((((.(((((..............))))).)))))))))))))))).))).....)))))))....)))))	chr1 - 95301082 95301190	space	100	0	-37.7	no	mir-9	Vertebrates	b, c		mir-9b-1	space	100	A	0	mir-9	Vertebrata	anotation	GCGCAGTGTATGGGGTTATTTTTACTTTCGGTTATCTAGCTTTATGAAGACTCCACACCACTCATACAGCTAGATAACCAAAGATAACAACCAACCCCGCCTCCTGGC	chr1 - 95301082 95301190	space
mir-9-1	CGGGGTTGGTTGTTATCTTTGGTTATCTAGCTGTATGAGTGGTGTGGAGTCTTCATAAAGCTAGATAACCGAAAGTAAAAATAACCCCA	.(((((((....((((.(((((((((((((((.((((((.(.(....).).)))))).))))))))))))))).))))...))))))).	chr1 + 95301091 95301180	intron	100	0	-41	yes	mir-9	Vertebrates	a, b		mir-9-1	intron	100	A	1	mir-9	Vertebrata	Ref1	CGGGGTTGGTTGTTATCTTTGGTTATCTAGCTGTATGAGTGGTGTGGAGTCTTCATAAAGCTAGATAACCGAAAGTAAAAATAACCCCA	chr1 + 95301091 95301180	intron
mir-1905b	TTGCTGCTGGATGCGCTTGATGGTTGCCCCTTTGGGGCCCACCACCAGCCCCACCACGCGGTAG	.(((((((((.((.(((.(.((((.(((((...)))))..))))).)))..))))).)))))).	chr1 - 95662033 95662097	space	95.31	1	-28	no	mir-1905	Vertebrates	c		mir-1905b	space	95.31	B	0	mir-1905	Vertebrata	anotation	TTGCTGCTGGATGCGCTTGATGGTTGCCCCTTTGGGGCCCACCACCAGCCCCACCACGCGGTAG	chr1 - 95662033 95662097	space
mir-92b	CGGGCCCCGGGCGGGCGGGAGGGACGGGACGCGGTGCAGTGTTGTTCTTTCCCCCGCCAATATTGCACTCGTCCCGGCCTCCGGCCCCCCCGGCCC	.(((((..(((.((((.(((((..(((((((.((((((((((((.............))))))))))))))))))).))))).))))))).)))))	chr1 - 96607483 96607579	space	100	0	-66	yes	mir-25	Vertebrates	a, b		mir-92b	space	100	A	1	mir-25	Vertebrata	Ref1	CGGGCCCCGGGCGGGCGGGAGGGACGGGACGCGGTGCAGTGTTGTTCTTTCCCCCGCCAATATTGCACTCGTCCCGGCCTCCGGCCCCCCCGGCCC	chr1 - 96607483 96607579	space
mir-190b	TGCTTCTGTGTGATATGTTTGATATTGGGTTGTTTAATTAGGAACCAACTAAATGTCAAACATATTCTTACAGCAGCTG	.(((.(((((.(((((((((((((((.((((((((......))).))))).)))))))))))))))..))))).)))..	chr1 + 97659079 97659158	space	100	0	-30.9	yes	mir-190	Vertebrates	a, b		mir-190b	space	100	A	1	mir-190	Vertebrata	Ref1	TGCTTCTGTGTGATATGTTTGATATTGGGTTGTTTAATTAGGAACCAACTAAATGTCAAACATATTCTTACAGCAGCTG	chr1 + 97659079 97659158	space
mir-6737	TTGGGTTGGGGTGGTGGGCCCTGGAGGGGGTTTGTTTGCTCATTCTCCTCTGTGCTTAACCCCTACCCAG	.(((((.(((((..(((((.(.((((((((..((......)).))))))))).)))))))))).))))).	chr1 + 97903480 97903550	intron	94.29	1	-32.8	no		Primates	b, c		mir-6737	intron	94.29	B	0		Primates	anotation	TTGGGTTGGGGTGGTGGGCCCTGGAGGGGGTTTGTTTGCTCATTCTCCTCTGTGCTTAACCCCTACCCAG	chr1 + 97903480 97903550	intron
mir-554	ACCTGAGTAACCTTTGCTAGTCCTGACTCAGCCAGTACTGATCTTACACTGGCAGTGGGTCAGGGTTCATATTTTGGCATCTCTCTCTGGGCATCT	.((.(((.......((((((((((((((((((((((...........))))))..))))))))))........)))))).....))).))......	chr1 - 100431483 100431579	intron	100	0	-31.9	no	mir-554	Primates	a, b		mir-554	intron	100	A	0	mir-554	Primates	Ref1	ACCTGAGTAACCTTTGCTAGTCCTGACTCAGCCAGTACTGATCTTACACTGGCAGTGGGTCAGGGTTCATATTTTGGCATCTCTCTCTGGGCATCT	chr1 - 100431483 100431579	intron
mir-6878	ATGAGAGGGAGAAAGCTAGAAGCTAAAGATTCTGAAAATCACTAACTGGCCTCTTCTTTCTCTCAG	.((((((((((((.(((((........((((.....)))).....)))))...)))))))))))).	chr1 - 101580529 101580595	intron	95.45	1	-20	no		Primates	b		mir-6878	intron	95.45	B	0		Primates		ATGAGAGGGAGAAAGCTAGAAGCTAAAGATTCTGAAAATCACTAACTGGCCTCTTCTTTCTCTCAG	chr1 - 101580529 101580595	intron
mir-6736	CTGAGCTGGGTGAGGGCATCTGTGGTTTGCTGGCTGCCTCAGCTCTTCTCTACCCACAG	(((...((((((((((...(((.(((.........))).)))...))))).))))))))	chr1 + 104503689 104503748	intron	98.31	0	-18.1	no		Primates	b, c		mir-6736	intron	98.31	A	0		Primates	anotation	CTGAGCTGGGTGAGGGCATCTGTGGTTTGCTGGCTGCCTCAGCTCTTCTCTACCCACAG	chr1 + 104503689 104503748	intron
mir-942	ATTAAGAGAGTACCTTCTCTGTTTTGGCCATGTGTGTACTCACAGCCCCTCACACATGGCCGAAACAGAGAAGGTACTTTCCTAAT	((((.(((((((((((((((((((((((((((((((..............))))))))))))))))))))))))))))))).))))	chr1 - 109658934 109659020	intron	98.84	0	-56.4	yes	mir-942	Primates	a, b		mir-942	intron	98.84	A	1	mir-942	Primates	Ref1	ATTAAGAGAGTACCTTCTCTGTTTTGGCCATGTGTGTACTCACAGCCCCTCACACATGGCCGAAACAGAGAAGGTACTTTCCTAAT	chr1 - 109658934 109659020	intron
mir-320b-1	CCTCTCTTTCTAGTTCTTCCTAGAGTGAGGAAAAGCTGGGTTGAGAGGGC	((((((..(((((((.(((((......))))).)))))))..))))))..	chr1 - 110084957 110085007	space	100	0	-23.8	yes	mir-320	Vertebrates	b, c		mir-320b-1	space	100	A	1	mir-320	Vertebrata	anotation	CCTCTCTTTCTAGTTCTTCCTAGAGTGAGGAAAAGCTGGGTTGAGAGGGC	chr1 - 110084957 110085007	space
mir-11399	TCAGTGCTCTTTCAGGTCTGGGGCTGAAACCTGTCTTGTTTCCCCATCGGAGGCAGTCCTAGGCCTGAAAGAGGAGGGCT	....(.((((((((((((((((((((...(((.(..((......))..).))))))))))))))))))))))).).....	chr1 - 113916974 113917054	space	93.75	0	-39.6	no		Primates	b, c		mir-11399	space	93.75	A	0		Primates	anotation	TCAGTGCTCTTTCAGGTCTGGGGCTGAAACCTGTCTTGTTTCCCCATCGGAGGCAGTCCTAGGCCTGAAAGAGGAGGGCT	chr1 - 113916974 113917054	space
mir-622	AGTACTGGTCTCAGCAGACTGAGGAGGGCGCCACAGTGGTCACCACGCAGTCTGCTGAGGTTGGAGTT	....(((((((((((((((((.(..((..((((...))))..)).).)))))))))))))))))....	chr1 + 115133692 115133760	space	94.12	0	-32.6	no	mir-622	Primates	b		mir-622	space	94.12	A	0	mir-622	Primates		AGTACTGGTCTCAGCAGACTGAGGAGGGCGCCACAGTGGTCACCACGCAGTCTGCTGAGGTTGGAGTT	chr1 + 115133692 115133760	space
mir-197	GTGCTCCGGGGGCTGTGCCGGGTAGAGAGGGCAGTGGGAGGTAAGAGCTCTTCACCCTTCACCACCTTCTCCACCCAGCATGGCCGGCAC	(((((.....((((((((.((((.(((((((..(((((.((((((....))).))).)))))..))))))).)))).)))))))))))))	chr1 - 117150547 117150637	space	100	0	-46.7	yes	mir-197	Mammals	a, b		mir-197	space	100	A	1	mir-197	Mammalia	Ref1	GTGCTCCGGGGGCTGTGCCGGGTAGAGAGGGCAGTGGGAGGTAAGAGCTCTTCACCCTTCACCACCTTCTCCACCCAGCATGGCCGGCAC	chr1 - 117150547 117150637	space
mir-553	CTTCAATTTTATTTGAAAAAGGTGAGGTTTTGTTTTGTCTGAGAAAATCTCACTGTTTTAGACTGAGG	.......(((((((((((..(((((((((((.((......)).))))))))))).))))))).)))).	chr1 - 126565896 126565964	intron	100	0	-18.1	no	mir-553	Primates	a, b		mir-553	intron	100	A	0	mir-553	Primates	Ref1	CTTCAATTTTATTTGAAAAAGGTGAGGTTTTGTTTTGTCTGAGAAAATCTCACTGTTTTAGACTGAGG	chr1 - 126565896 126565964	intron
mir-137	GGTCCTCTGACTCTCTTCGGTGACGGGTATTCTTGGGTGGATAATACGGATTACGTTGTTATTGCTTAAGAATACGCGTAGTCGAGGAGAGTACCAGCGGCA	.(.((.((((((((((((((..(((.(((((((((((((.((((((((.....)).))))))))))))))))))).)))..)))))))))))..))).))).	chr1 + 128814989 128815091	space	100	0	-47.6	no	mir-137	Vertebrates	a, b		mir-137	space	100	A	0	mir-137	Vertebrata	Ref1	GGTCCTCTGACTCTCTTCGGTGACGGGTATTCTTGGGTGGATAATACGGATTACGTTGTTATTGCTTAAGAATACGCGTAGTCGAGGAGAGTACCAGCGGCA	chr1 + 128814989 128815091	space
mir-2682	ACCTTCCTGAAAGAGGTTGGGGCAGGCAGTGACTGTTCAGACGTCCAATCTCTTTGGGACACCTCTTCAGCGCTGTCTTCCCTGCCTCTGCCTTTAGGACGAGTCTCAAA	..(.(((((((((((((.((((.((((((((.(((...((..((((..........))))..))...))))))))))))))).))))))...))))))).).........	chr1 + 128815808 128815918	space	99.09	0	-44.3	no		Primates	a, b		mir-2682	space	99.09	A	0		Primates	Ref2	ACCTTCCTGAAAGAGGTTGGGGCAGGCAGTGACTGTTCAGACGTCCAATCTCTTTGGGACACCTCTTCAGCGCTGTCTTCCCTGCCTCTGCCTTTAGGACGAGTCTCAAA	chr1 + 128815808 128815918	space
mir-378g	CACTGGGCTTGGAGTCAGAAGACCTGACTCCAGCCCAGGTC	..(((((((.((((((((.....)))))))))))))))...	chr1 + 132183878 132183919	intron	95.12	0	-28.6	yes	mir-378	Mammals	b		mir-378g	intron	95.12	A	1	mir-378	Mammalia	novel	CACTGGGCTTGGAGTCAGAAGACCTGACTCCAGCCCAGGTC	chr1 + 132183878 132183919	intron
mir-760	GGCGCGTCGCCCCCCTCAGTCCACCAGAGCCCGGATACCTCAGAAATTCGGCTCTGGGTCTGTGGGGAGCGAAATGCAAC	.(((..((((.((((.(((....((((((((.((((.........))))))))))))..))).)))).))))..)))...	chr1 - 133083490 133083570	space	100	0	-39.5	yes	mir-760	Mammals	a, b		mir-760	space	100	A	1	mir-760	Mammalia	Ref1	GGCGCGTCGCCCCCCTCAGTCCACCAGAGCCCGGATACCTCAGAAATTCGGCTCTGGGTCTGTGGGGAGCGAAATGCAAC	chr1 - 133083490 133083570	space
mir-7179	ATACGTGACAAAGCTCCTGAAAATAAGTCAGATATTTTCAGGAACTTTGTCACGTATGA	(((((((((((((.(((((((((((.......))))))))))).)))))))))))))..	chr1 + 148320636 148320695	intron	100	0	-32.6	no		Cercopithecidae	a, b		mir-7179	intron	100	A	0		Cercopithecidae	Ref1	ATACGTGACAAAGCTCCTGAAAATAAGTCAGATATTTTCAGGAACTTTGTCACGTATGA	chr1 + 148320636 148320695	intron
mir-7156	TTGTTCTCAAACTGGCTGTCAGAATGTGGATGGCAGGCTGCAGCCACTTGGGGAACCGGC	..((((((.((.((((((.(((..(((.....)))..))))))))).)).))))))....	chr1 - 150169877 150169937	intron	93.33	0	-25	no		Primates	b, c		mir-7156	intron	93.33	A	0		Primates	anotation	TTGTTCTCAAACTGGCTGTCAGAATGTGGATGGCAGGCTGCAGCCACTTGGGGAACCGGC	chr1 - 150169877 150169937	intron
mir-7975	GAGCAAAGAGCAGGAGGACAGCGGATTGATCTCCCAAGGGAGGTCCCCTGATCCGAGTCACGGCACCA	.........((.....(((..(((((((((((((....)))))))....)))))).)))...))....	chr1 - 154603662 154603730	space	94.12	1	-21.7	no		Primates	b		mir-7975	space	94.12	B	0		Primates		GAGCAAAGAGCAGGAGGACAGCGGATTGATCTCCCAAGGGAGGTCCCCTGATCCGAGTCACGGCACCA	chr1 - 154603662 154603730	space
mir-548aq	AAAAGTAATTGCTGTTTTTGCCATTACTTTCAGTGGCAAAACCACAATTACTTTTGCA	(((((((((((.((.((((((((((......)))))))))).)))))))))))))...	chr1 + 155265242 155265300	intron	93.1	0	-23.3	no	mir-548	Primates	a		mir-548aq	intron	93.1	A	0	mir-548	Primates	Ref2	AAAAGTAATTGCTGTTTTTGCCATTACTTTCAGTGGCAAAACCACAATTACTTTTGC	chr1 + 155265242 155265300	intron
mir-186	TGCTTGTAACTTTCCAAAGAATTCTCCTTTTGGGCTTTCTGGTTTTATTTTAAGCCCAAAGGTGAATTTCTTGGGAAGTTTGAGCT	.(((((.((((((((((.((((((.(((((.((((((..............))))))))))).)))))).))))))))))))))).	chr1 + 156269168 156269254	intron	100	0	-37.7	yes	mir-186	Mammals	a, b		mir-186	intron	100	A	1	mir-186	Mammalia	Ref1	TGCTTGTAACTTTCCAAAGAATTCTCCTTTTGGGCTTTCTGGTTTTATTTTAAGCCCAAAGGTGAATTTCTTGGGAAGTTTGAGCT	chr1 + 156269168 156269254	intron
mir-1262	TTGACCATAAAAAATAAATTCTGTGAATTTCATCCTTCTATAAATTCATCCATCACATTATCTAGAATGGTGATGGGTGAATTTGTAGAAGGATGAGAGTCAAAGAATCCTT	.................(((((.(((.((((((((((((((((((((((((((((((((......))).))))))))))))))))))))))))))))).))).)))))....	chr1 + 159139119 159139231	intron	100	0	-51.6	yes	mir-1262	Primates	a, b		mir-1262	intron	100	A	1	mir-1262	Primates	Ref1	TTGACCATAAAAAATAAATTCTGTGAATTTCATCCTTCTATAAATTCATCCATCACATTATCTAGAATGGTGATGGGTGAATTTGTAGAAGGATGAGAGTCAAAGAATCCTT	chr1 + 159139119 159139231	intron
mir-101-1	AGGCTGCCCTGGCTCAGTTATCACAGTGCTGATGCTGTCCATTCTAAAGGTACAGTACTGTGATAACTGAAGGATGGCAGCCA	.(((((((.....((((((((((((((((((.((((............)))))))))))))))))))))).....))))))).	chr1 + 162328580 162328663	intron	100	0	-47	yes	mir-101	Vertebrates	a, b		mir-101-1	intron	100	A	1	mir-101	Vertebrata	Ref1	AGGCTGCCCTGGCTCAGTTATCACAGTGCTGATGCTGTCCATTCTAAAGGTACAGTACTGTGATAACTGAAGGATGGCAGCCA	chr1 + 162328580 162328663	intron
mir-4794	TTTTAACATCTGGCTATCTCACGAGACTGTGTGTCCTAACAGTGCTTGTAGTCTCATGAGATAGCCAGATGTTTAAAA	(((.(((((((((((((((((.(((((((...((.((...)).))...))))))).))))))))))))))))).))).	chr1 - 162817654 162817732	intron	98.7	0	-39.9	no		Primates	b		mir-4794	intron	98.7	A	0		Primates		TTTTAACATCTGGCTATCTCACGAGACTGTGTGTCCTAACAGTGCTTGTAGTCTCATGAGATAGCCAGATGTTTAAAA	chr1 - 162817654 162817732	intron
mir-6068	TGGAAAAAGCCCTGCGAGTCTCCGGCGGCGGCTTGTGGCTGAGTGTCACGCTGCTGGCGCAGGCTCGGCCGGTATTGCTG	........(((...(((((((.((.(((((((..(((((.....)))))))))))).)).)))))))...))).......	chr1 + 164069852 164069932	space	98.33	1	-37.5	no		Primates	b, c		mir-6068	space	98.33	B	0		Primates	anotation	CCTGCGAGTCTCCGGCGGCGGCTTGTGGCTGAGTGTCACGCTGCTGGCGCAGGCTCGGCC	chr1 + 164069862 164069922	space
mir-761	TGGCAAGAGGAGGAGCAGCAGGGTGAAACTGACACAGTTCTGGTGAGTTTCACTTTGCTGCTCCTCCTGA	.......(((((((((((((((((((((((.((.((....)))).)))))))))))))))))))))))..	chr1 + 175704828 175704898	intron	100	0	-46.9	no	mir-761	Mammals	a, b		mir-761	intron	100	A	0	mir-761	Mammalia	Ref1 Ref2	TGGCAAGAGGAGGAGCAGCAGGGTGAAACTGACACAGTTCTGGTGAGTTTCACTTTGCTGCTCCTCCTGA	chr1 + 175704828 175704898	intron
mir-6500	CCTGCCTGCAGAAAGGAGCTTTCCACTCCAGGTGTCCTCTCTGCTGAGAGTTGGACACTTGTTGGGATGACCTGCCTGCAGATAGG	((((.((((((..(((....(((((...(((((((((.((((....))))..))))))))).)))))...)))..)))))).))))	chr1 - 176498055 176498141	space	94.19	0	-42.1	no	mir-4421	Primates	b		mir-6500	space	94.19	A	0	mir-4421	Primates		CCTGCCTGCAGAAAGGAGCTTTCCACTCCAGGTGTCCTCTCTGCTGAGAGTTGGACACTTGTTGGGATGACCTGCCTGCAGATAGG	chr1 - 176498055 176498141	space
mir-2414	GTATTTTGTGTTAGTGTGGATGGTGTTATATGTTAAGACATTAAAGTTAACACCATAAGCAGAGCACAAAATGC	((((((((((((..(((..(((((((((....((((....))))...)))))))))..))).))))))))))))	chr1 + 183229392 183229466	intron	98.65	1	-29.5	no		Mammals	b		mir-2414	intron	98.65	B	0		Mammalia		GTATTTTGTGTTAGTGTGGATGGTGTTATATGTTAAGACATTAAAGTTAACACCATAAGCAGAGCACAAAATGC	chr1 + 183229392 183229466	intron
mir-6079	TCCTAGACCTAGTATCAGTGGCCAAACGAACTTTTTTGGAAGCTGGGACCAACTAGCTGGCT	..((((..(((((.(((((..(((((........)))))..))))).....)))))))))..	chr1 - 183767494 183767556	intron	95.16	1	-15.7	no		Primates	b, c		mir-6079	intron	95.16	B	0		Primates	anotation	TCCTAGACCTAGTATCAGTGGCCAAACGAACTTTTTTGGAAGCTGGGACCAACTAGCTGGCT	chr1 - 183767494 183767556	intron
mir-6735	GCAGCCAGGGCAGAGAGCACAGGAATCTGAGGTGACTGGCACAGAAGACTCAGGCCTGTGGCTCCTCCCCCAG	.......(((.((.(((((((((..((((((....(((...)))....))))))))))).)))))).)))...	chr1 - 184167221 184167294	intron	97.26	1	-28.3	yes		Primates	b, c		mir-6735	intron	97.26	B	2		Primates	anotation	GCAGCCAGGGCAGAGAGCACAGGAATCTGAGGTGACTGGCACAGAAGACTCAGGCCTGTGGCTCCTCCCCCAG	chr1 - 184167221 184167294	intron
mir-6734	AGAACTTGTGGGGAGAATGAGGTGGAGAGGCCCAGGTTCTGAATCCCCTTCCCTCACTCTTCTCTCAG	......((.(((((((.(((((.((((.((..(((...)))...)).))))))))).))))))).)).	chr1 + 184255174 184255242	intron	97.06	0	-25.2	no		Primates	b, c		mir-6734	intron	97.06	A	0		Primates	anotation	AGAACTTGTGGGGAGAATGAGGTGGAGAGGCCCAGGTTCTGAATCCCCTTCCCTCACTCTTCTCTCAG	chr1 + 184255174 184255242	intron
mir-1268a	TAGCCGGGCGTGGTGGCGGGCGCCTGTAGTCCCAGCTACTTTGGAGGCTGAG	(((((...((.((((((((((.......).))).)))))).))..)))))..	chr1 + 186582070 186582122	intron	94.23	2	-21	no	mir-1268	Primates	b		mir-1268a	intron	94.23	C	0	mir-1268	Primates		TAGCCGGGCGTGGTGGCGGGCGCCTGTAGTCCCAGCTACTTTGGAGGCTGAG	chr1 + 186582070 186582122	intron
mir-30c-1	ACCATGCTGTAGTGTGTGTAAACATCCTACACTCTCAGCTGTGAGCTCAAGGTGGCTGGGAGAGGGTTGTTTACTCCTTCTGCCATGGA	.(((((..((((...(.(((((((.(((...(((((((((....(((...)))))))))))).))).))))))).)...))))))))).	chr1 - 186962061 186962150	intron	100	0	-34.3	yes	mir-30	Vertebrates	a, b		mir-30c-1	intron	100	A	1	mir-30	Vertebrata	Ref1	ACCATGCTGTAGTGTGTGTAAACATCCTACACTCTCAGCTGTGAGCTCAAGGTGGCTGGGAGAGGGTTGTTTACTCCTTCTGCCATGGA	chr1 - 186962061 186962150	intron
mir-30e	TTCTGGGCAGTCTTTGCTACTGTAAACATCCTTGACTGGAAGCTGTAAGGTGTTCAGAGGAGCTTTCAGTCGGATGTTTACAGCGGCAGGCTGCCACGGTCGTCCCCAGCTAC	..(((((((((((..(((.((((((((((((..(((((((((((.(...(....)...).))))))))))))))))))))))).))))))))))).)))..............	chr1 - 186964995 186965108	intron	100	0	-54.4	yes	mir-30	Vertebrates	b, c		mir-30e	intron	100	A	1	mir-30	Vertebrata	anotation	TTCTGGGCAGTCTTTGCTACTGTAAACATCCTTGACTGGAAGCTGTAAGGTGTTCAGAGGAGCTTTCAGTCGGATGTTTACAGCGGCAGGCTGCCACGGTCGTCCCCAGCTAC	chr1 - 186964995 186965108	intron
mir-30f	TGGCAGCCTGCCGCTGTAAACATCCGACTGAAAGCTCCTCTGAACACCTTACAGCTTCCAGTCAAGGATGTTTACAGTAGCAAAGACTGCCC	.((((((.(((.((((((((((((((((((.(((((................))))).)))))..))))))))))))).)))..).))))).	chr1 + 186965012 186965104	space	98.91	0	-42.1	no	mir-30	Vertebrates	b, c		mir-30f	space	98.91	A	0	mir-30	Vertebrata	anotation	TGGCAGCCTGCCGCTGTAAACATCCGACTGAAAGCTCCTCTGAACACCTTACAGCTTCCAGTCAAGGATGTTTACAGTAGCAAAGACTGCCC	chr1 + 186965012 186965104	space
mir-6732	AGGCCTAGGGGGTGGCAGGCTGGCCATCAGTGTGGGCTAACCCTGTCCTCCTCTCCCTCCCAG	(((...((((((.((((((.(((((.........)))))..)))))).)))))).))).....	chr1 - 190339576 190339639	intron	100	0	-24.6	no		Primates	b		mir-6732	intron	100	A	0		Primates		AGGCCTAGGGGGTGGCAGGCTGGCCATCAGTGTGGGCTAACCCTGTCCTCCTCTCCCTCCCAG	chr1 - 190339576 190339639	intron
mir-552	ACCATTCAAATATACCACAGTTTGTTTGACCATTAACCTGTTTGTTGAAGATGCCTTTCAACGGGTGACTGGTTAGACAAACTGTGGTATATTCA	........((((((((((((((((((((((((...((((((....(((((.....)))))))))))...))))))))))))))))))))))))..	chr1 + 193258218 193258313	space	100	0	-45	no	mir-552	Primates	a		mir-552	space	100	A	0	mir-552	Primates	Ref1	ACCATTCAAATATACCACAGTTTGTTTGACCATTAACCTGTTTGTTGAAGATGCCTTTCAACGGGTGACTGGTTAGACAAACTGTGGTATATTCA	chr1 + 193258218 193258313	space
mir-3605	ATGATGACATGGGGGAAGGTTTGAGGAGGGCTGGCCTCTGTGCCTGGATACTTTATACATGTAATTGTGATGAGGATGGATAGCAAGGAAGCCTCTCCCACCTGACCCTCA	.........((((((.((((..(.((((((((..(((((((.((...((.(((((((((......))).))))))))))))))..))).)))).)))))))))..))))))	chr1 + 194620557 194620668	intron	98.2	0	-36.4	no	mir-3605	Primates	b		mir-3605	intron	98.2	A	0	mir-3605	Primates		ATGATGACATGGGGGAAGGTTTGAGGAGGGCTGGCCTCTGTGCCTGGATACTTTATACATGTAATTGTGATGAGGATGGATAGCAAGGAAGCCTCTCCCACCTGACCCTCA	chr1 + 194620557 194620668	intron
mir-4254	CTTGGGAGGAGGGTGAGGTGGCTCCTTTGCAGTGAGTAGGTCTTCCTGGAGCTACTCCACCATCTCCCCCAGCCCC	.(((((.((((((((.(((((((((............(((....)))))))))))).))))..)))))))))....	chr1 + 196286194 196286270	intron	96.05	0	-34.8	no		Primates	b, c		mir-4254	intron	96.05	A	0		Primates	anotation	CTTGGGAGGAGGGTGAGGTGGCTCCTTTGCAGTGAGTAGGTCTTCCTGGAGCTACTCCACCATCTCCCCCAGCCCC	chr1 + 196286194 196286270	intron
mir-1976	TGGCCTCTGGGCACGGGGGTTGGGTGTGCAAAGGGTGGCAGCAAGGAAGGCAGGGTTCCTGAGGTGTGTCCTCCTGCCCTCCTTGCTGTAGACTTTGGCCTGAGCAAGGAG	.((((((((....))))))))((((...(((((....((((((((((.((((((.......(((.....))))))))).))))))))))...)))))))))..........	chr1 - 201748738 201748849	intron	98.2	0	-49.6	yes	mir-1976	Primates	b		mir-1976	intron	98.2	A	2	mir-1976	Primates		TGGCCTCTGGGCACGGGGGTTGGGTGTGCAAAGGGTGGCAGCAAGGAAGGCAGGGTTCCTGAGGTGTGTCCTCCTGCCCTCCTTGCTGTAGACTTTGGCCTGAGCAAGGAG	chr1 - 201748738 201748849	intron
mir-3917	GGCGCTTTTGTGCGCGCCCGGGTCTGTTGGTGCTCAGAGTGTGGTCAGGCGGCTCGGACCGAGCAGGTGGGTGCGGGGCTCGGAGGAGGCGGC	.((((....))))(((((((..(((((((((.(...((((((......)).))))).))).)))))))))))))..(.(((....))).)...	chr1 + 202453621 202453714	intron	98.92	1	-37.2	no		Primates	b, c		mir-3917	intron	98.92	B	0		Primates	anotation	GGCGCTTTTGTGCGCGCCCGGGTCTGTTGGTGCTCAGAGTGTGGTCAGGCGGCTCGGACCGAGCAGGTGGGTGCGGGGCTCGGAGGAGGCGGC	chr1 + 202453621 202453714	intron
mir-6731	ACAGGTGGGAGAGCAGGGTATTGTGGAAGCTCCAGGTGCCAACTGCCTGCCTCTATCCCCCACTCTCCCCAG	....(.(((((((..(((....(((((.((....(((....)))....)).))))).)))..))))))))..	chr1 + 203436806 203436878	intron	95.83	0	-25.5	yes		Primates	b, c		mir-6731	intron	95.83	A	1		Primates	anotation	ACAGGTGGGAGAGCAGGGTATTGTGGAAGCTCCAGGTGCCAACTGCCTGCCTCTATCCCCCACTCTCCCCAG	chr1 + 203436806 203436878	intron
mir-378f	GTCAGGTCCTGGACTCCCATAGCTTTCAGGCTGCTAAACAACAGAGCGAGCACTGGACTTGGCGCCGGAAGTCTTGGG	(((........))).((((..((((((.(((.(((((....(((........)))...))))))))))))))..))))	chr1 - 204450839 204450917	space	94.87	2	-25.8	no	mir-378	Mammals	b, c		mir-378f	space	94.87	C	0	mir-378	Mammalia	anotation	GTCAGGTCCTGGACTCCCATAGCTTTCAGGCTGCTAAACAACAGAGCGAGCACTGGACTTGGCGCCGGAAGTCTTGGG	chr1 - 204450839 204450917	space
mir-3115	TCTGAATATGGGTTTACTAGTTGGTGGCCAATTCATGAGTCACCAACTATTAGGCCTTTATGTCCAGA	((((.(((((((((((.(((((((((((((.....)).))))))))))).)))))))..)))).))))	chr1 - 205395504 205395572	intron	95.59	0	-29.4	no		Primates	b, c		mir-3115	intron	95.59	A	0		Primates	anotation	TCTGAATATGGGTTTACTAGTTGGTGGCCAATTCATGAGTCACCAACTATTAGGCCTTTATGTCCAGA	chr1 - 205395504 205395572	intron
mir-4684	GCACCAGGGGTACCTCTCTACTGACTTGCAACATACATTTGTATTGGTGTGTTGCAAGTCAGTGGAGAGGTACCCTTGGTGT	((((((((((((((((((((((((((((((((((((..........))))))))))))))))))))))))))))))))))))	chr1 - 205713917 205713999	intron	95.12	0	-68.4	yes		Primates	b		mir-4684	intron	95.12	A	3		Primates		GCACCAGGGGTACCTCTCTACTGACTTGCAACATACATTTGTATTGGTGTGTTGCAAGTCAGTGGAGAGGTACCCTTGGTGT	chr1 - 205713917 205713999	intron
mir-6127	CCTAACTCACAGTGTGACCCTGGGCAAGTTATCTCATCTTTCTGAACCCCACTTTCTCCAGCTACCAAGATGAGGGAGTGGGTGGGAGGTGGGAAGACTGCCCAAATGA	......((((...))))...((((((.(((.(((((((((((.....(((((((((((...((....))..))))))))))).))))))))))).))))))))).....	chr1 + 205800761 205800870	space	100	0	-43.3	no	mir-6127	Primates	a, b		mir-6127	space	100	A	0	mir-6127	Primates	Ref1	CCTAACTCACAGTGTGACCCTGGGCAAGTTATCTCATCTTTCTGAACCCCACTTTCTCCAGCTACCAAGATGAGGGAGTGGGTGGGAGGTGGGAAGACTGCCCAAATGA	chr1 + 205800761 205800870	space
mir-4418	TGGTTTTTGCTTTGAGTGACCGTGGTGGTCGTGGGAGTCACTGCAGGACTCAGCAGGAATGC	..(((((((((..((((..(((((((((((....)).))))))).)))))))))))))))..	chr1 - 206171327 206171389	space	95.16	0	-21.5	no		Primates	b		mir-4418	space	95.16	A	0		Primates		TGGTTTTTGCTTTGAGTGACCGTGGTGGTCGTGGGAGTCACTGCAGGACTCAGCAGGAATGC	chr1 - 206171327 206171389	space
mir-1256	AGTCAGCCTGTTGAAGCTTTGAAGCTTTGATGCTAGGCATTGACTTCTCACTAGCTATGAAAGTCCTAGTTAGAGAGAAGTCAATGCATGACATCTTGTTTCAATAGATGGCTGTTTCA	(((((..((((((((((...........((((.((.(((((((((((((.(((((((.((...)).))))))).))))))))))))).)).))))..)))))))))).)))))......	chr1 + 207408800 207408919	intron	97.48	0	-48.4	no	mir-1256	Mammals	b		mir-1256	intron	97.48	A	0	mir-1256	Mammalia		AGTCAGCCTGTTGAAGCTTTGAAGCTTTGATGCTAGGCATTGACTTCTCACTAGCTATGAAAGTCCTAGTTAGAGAGAAGTCAATGCATGACATCTTGTTTCAATAGATGGCTGTTTCA	chr1 + 207408800 207408919	intron
mir-6084	AGCGTCCGGGCTGGGCCGCAGGACCGGGAGCGGAGCCTCGCAGGATCGGTCTCGGGCTCCCCAACCGCCTCCGCTTCTTTCGCCAGTCGGTGGCCGGGCTGGCGGCGCGG	.((((((.((((.((((((..(((.(((((.(((((...(.(((..((((...(((...))).)))))))).))))).))).)).))).)))))).)))).).)))))..	chr1 - 207760161 207760271	CDS	93.64	1	-56.1	no		Primates	b, c		mir-6084	CDS	93.64	B	0		Primates	anotation	AGCGTCCGGGCTGGGCCGCAGGACCGGGAGCGGAGCCTCGCAGGATCGGTCTCGGGCTCCCCAACCGCCTCCGCTTCTTTCGCCAGTCGGTGGCCGGGCTGGCGGCGCGG	chr1 - 207760161 207760271	cds
mir-4468	AGTCTTCTCCTGGGGCTTCGGTGGCTATGGCCGACTGGGCCACGCAGAGCAGAAGGATGAGATG	.(((((.((((...((((..(((....(((((.....)))))))).))))...)))).))))).	chr1 + 211083519 211083583	CDS	93.75	0	-25.7	no		Primates	b		mir-4468	cds	93.75	A	0		Primates		AGTCTTCTCCTGGGGCTTCGGTGGCTATGGCCGACTGGGCCACGCAGAGCAGAAGGATGAGATG	chr1 + 211083519 211083583	cds
mir-4632	GAGGGCAGTGTGGGTGTGGCGGAGTCAGGCGTGACCGTGTGCTGCCCTCTCGCTGCTCTAG	.(((((((((.(((.((((((.(((((....))))..).)))))).))).)))))))))..	chr1 - 215900860 215900921	intron	93.44	1	-29.6	no		Primates	b, c		mir-4632	intron	93.44	B	0		Primates	anotation	GAGGGCAGTGTGGGTGTGGCGGAGTCAGGCGTGACCGTGTGCTGCCCTCTCGCTGCTCTAG	chr1 - 215900860 215900921	intron
mir-6729	AAGGGTGGGCGAGGGTGGCTGAGCGGCTCTATCCCCCGGCCTGCTCATCCCCCTCGCCCTCTCAG	..(((.(((((((((.((.(((((((((.........)))).))))).))))))))))).)))..	chr1 - 216065287 216065352	intron	95.38	0	-41.4	no		Primates	b		mir-6729	intron	95.38	A	0		Primates		AAGGGTGGGCGAGGGTGGCTGAGCGGCTCTATCCCCCGGCCTGCTCATCCCCCTCGCCCTCTCAG	chr1 - 216065287 216065352	intron
mir-5697	AAGTAGTTTCATGATAAAGGGTGTGTGGGAGGTCAACCTTTTATCTGAAACTGCTTGA	(((((((((((.((((((((((.((........)))))))))))))))))))))))..	chr1 - 218235280 218235338	intron	100	0	-25.7	yes	mir-5697	Primates	a, b		mir-5697	intron	100	A	1	mir-5697	Primates	Ref1	AAGTAGTTTCATGATAAAGGGTGTGTGGGAGGTCAACCTTTTATCTGAAACTGCTTGA	chr1 - 218235280 218235338	intron
mir-34a	GGCCAGCTGTGAGTGTTTCTTTGGCAGTGTCTTAGCTGGTTGTTGTGAGCAATAGTAAGGAAGCAATCAGCAAGTATACTGCCCTAGAAGTGCTACACATTGTGGGGCCT	((((.(((((((((((((((..(((((((((((.((((((((((....((....)).....))))))))))))).))))))))..))))))))).))))..))..)))).	chr1 + 219115607 219115717	space	100	0	-48.3	yes	mir-34	Vertebrates	a, b		mir-34a	space	100	A	1	mir-34	Vertebrata	Ref1	GGCCAGCTGTGAGTGTTTCTTTGGCAGTGTCTTAGCTGGTTGTTGTGAGCAATAGTAAGGAAGCAATCAGCAAGTATACTGCCCTAGAAGTGCTACACATTGTGGGGCCT	chr1 + 219115607 219115717	space
mir-4252	TGGGGGGCTGGCGGCTCATCAGTCCAGGCCATCTGGCCACTGGGTCAGCACCAGCGCCCAATC	..(((.(((((..(((..(((((...((((....)))))))))...))).))))).)))....	chr1 + 221937211 221937274	space	96.83	1	-32.7	no		Primates	b, c		mir-4252	space	96.83	B	0		Primates	anotation	TGGGGGGCTGGCGGCTCATCAGTCCAGGCCATCTGGCCACTGGGTCAGCACCAGCGCCCAATC	chr1 + 221937211 221937274	space
mir-551a	GGGGACTGCCGGGTGACCCTGGAAATCCAGAGTGGGTGGGGCCTGTCTGACCATTTCTAGGCGACCCACTCTTGGTTTCCAGGGTTGCCCTGGAAA	((......))(((((((((((((((((.(((((((((...(((((............))))).))))))))).)))))))))))))))))......	chr1 + 224919874 224919970	intron	100	0	-55.6	yes	mir-551	Vertebrates	a, b		mir-551a	intron	100	A	1	mir-551	Vertebrata	Ref1	GGGGACTGCCGGGTGACCCTGGAAATCCAGAGTGGGTGGGGCCTGTCTGACCATTTCTAGGCGACCCACTCTTGGTTTCCAGGGTTGCCCTGGAAA	chr1 + 224919874 224919970	intron
mir-6726	GGGGGCGGGAGCCGGGGTCTGCAGGTTTGCACTGATGCCTGCTCGCCCTGTCTCCCGCCAG	...((((((((.((((((..((((((.(......).))))))..)))))).))))))))..	chr1 + 227121839 227121900	intron	95.08	1	-40.4	no		Primates	b		mir-6726	intron	95.08	B	0		Primates		GGGGGCGGGAGCCGGGGTCTGCAGGTTTGCACTGATGCCTGCTCGCCCTGTCTCCCGCCAG	chr1 + 227121839 227121900	intron
mir-429	CGCCGGCCGATGAGCGTCTTACCAGACACGGTTAGACCTGGCTCTCTGTCTAATACTGTCTGGTAAAACCGTCCATCCGCGGC	.((((.(.((((.(((..((((((((((..(((((((..........)))))))..))))))))))...))).)))).)))))	chr1 - 227255265 227255348	space	100	0	-34.2	yes	mir-8	Vertebrates	a, b		mir-429	space	100	A	1	mir-8	Vertebrata	Ref1	CGCCGGCCGATGAGCGTCTTACCAGACACGGTTAGACCTGGCTCTCTGTCTAATACTGTCTGGTAAAACCGTCCATCCGCGGC	chr1 - 227255265 227255348	space
mir-200a	CCGGGCCCCTGTGAGCATCTTACCGGACAGTGCTGGATTTCCCAGCTTGACTCTAACACTGTCTGGTAACGATGTTCAAAGGTGACCCAC	..((((.(((.(((((((((((((((((((((((((.....)))))...........)))))))))))).)))))))).))).).)))..	chr1 - 227256329 227256419	space	100	0	-45.5	yes	mir-8	Vertebrates	a, b		mir-200a	space	100	A	1	mir-8	Vertebrata	Ref1	CCGGGCCCCTGTGAGCATCTTACCGGACAGTGCTGGATTTCCCAGCTTGACTCTAACACTGTCTGGTAACGATGTTCAAAGGTGACCCAC	chr1 - 227256329 227256419	space
mir-6821	GTGCGTGGGGGCTCGAGGCGGGGGTGGGGGCCTCGCCCTGCCCGGGACCTCCCTGACCTCTCCGCTCCGCACAG	(((((.((.((...((((((.((((((((......))))))))(((....))))).)))).)).)).)))))..	chr10 - 934111 934185	intron	94.59	0	-38.4	no		Primates	b, c		mir-6821	intron	94.59	A	0		Primates	anotation	GTGCGTGGGGGCTCGAGGCGGGGGTGGGGGCCTCGCCCTGCCCGGGACCTCCCTGACCTCTCCGCTCCGCACAG	chr10 - 934111 934185	intron
mir-3667	TGAGGATGAAAGACCCATGGAGGAGAAGGTTCTGCTGGCTAAGAACCTTCCTCTCCATGGGTCTTTCATCCTTA	(((((((((((((((((((((((.(((((((((........))))))))).)))))))))))))))))))))))	chr10 + 1381220 1381294	space	95.95	0	-56	no		Primates	b		mir-3667	space	95.95	A	0		Primates		TGAGGATGAAAGACCCATGGAGGAGAAGGTTCTGCTGGCTAAGAACCTTCCTCTCCATGGGTCTTTCATCCTTA	chr10 + 1381220 1381294	space
mir-3201	GGAATATGAAGAAAAATAAGAGGCTAGGATTAGCCTCTTATTTTTACATGCCT	((..((((...(((((((((((((((....))))))))))))))).)))))).	chr10 - 2633398 2633451	space	96.15	1	-20.9	no		Primates	b		mir-3201	space	96.15	B	0		Primates		GGAATATGAAGAAAAATAAGAGGCTAGGATTAGCCTCTTATTTTTACATGCCT	chr10 - 2633398 2633451	space
mir-3596	CTCAGGGAAGGCAGTAGGTTGTATAGTTATCTTCTGAGGGGCAACATCACTGCCCTGAAACCACACAACCTACTACCTCACCC	....((..(((.((((((((((...(((.((......((((((.......)))))))))))...)))))))))).)))..)).	chr10 + 4843231 4843314	space	93.98	0	-30.9	no	let-7	Mammals	b, c		mir-3596	space	93.98	A	0	let-7	Mammalia	anotation	CTCAGGGAAGGCAGTAGGTTGTATAGTTATCTTCTGAGGGGCAACATCACTGCCCTGAAACCACACAACCTACTACCTCACC	chr10 + 4843231 4843314	space
let-7b	CGGGGTGAGGTAGTAGGTTGTGTGGTTTCAGGGCAGTGATGTTGCCCCTCAGAAGATAACTATACAACCTACTGCCTTCCCTG	(((((.(((((((((((((((((((((((.((((((.....)))))).......)).))))))))))))))))))))))))))	chr10 - 4843233 4843316	space	100	0	-46.3	yes	let-7	Vertebrates	a, b		let-7b	space	100	A	1	let-7	Vertebrata	Ref1	CGGGGTGAGGTAGTAGGTTGTGTGGTTTCAGGGCAGTGATGTTGCCCCTCAGAAGATAACTATACAACCTACTGCCTTCCCTG	chr10 - 4843233 4843316	space
let-7a-3	AGACCGACTGCCCTTTGGGGTGAGGTAGTAGGTTGTATAGTTTGGGGCTCTGCCCTGCTATGGGATAACTATACAATCTACTGTCTTTCCTGAAGTGGCTGTAATATCT	(((...((.(((((((((((.(((((((((((((((((((((((((((...)))))).........))))))))))))))))))))))))))))).))).))....)))	chr10 - 4844141 4844250	space	100	0	-46.2	yes	let-7	Vertebrates	a, b		let-7a-3	space	100	A	5	let-7	Vertebrata	Ref1	AGACCGACTGCCCTTTGGGGTGAGGTAGTAGGTTGTATAGTTTGGGGCTCTGCCCTGCTATGGGATAACTATACAATCTACTGTCTTTCCTGAAGTGGCTGTAATATCT	chr10 - 4844141 4844250	space
mir-4762	CTGATACCCCAAATCTTGATCCGAAGCCTTGATCAGAAGCTACTAAGGCTTCTGATCAAGATTTGTGCTGTCAAG	.(((((.(.((((((((((((.(((((((((............))))))))).)))))))))))).).)))))..	chr10 - 5214156 5214231	intron	94.67	1	-33.4	no		Primates	b, c		mir-4762	intron	94.67	B	0		Primates	anotation	CTGATACCCCAAATCTTGATCCGAAGCCTTGATCAGAAGCTACTAAGGCTTCTGATCAAGATTTGTGCTGTCAAG	chr10 - 5214156 5214231	intron
mir-1249	CATCCTGCTCCTCAGATTCTTGTTGGCATGGGGAGGAGGGAGGAGATGGGCTAAGTTCCCTCTGGCTGGAACGCCCTTCCCCCCCTTCTTCACCTGGCGAACTCCTACTCGT	....(((.....)))......(((.((..(((((((((((.((.((.((((...(((((........))))))))).)).))))))))))).))..)).)))..........	chr10 + 5796268 5796380	intron	99.11	0	-44.3	yes	mir-1249	Mammals	a, b		mir-1249	intron	99.11	A	1	mir-1249	Mammalia	Ref1	CATCCTGCTCCTCAGATTCTTGTTGGCATGGGGAGGAGGGAGGAGATGGGCTAAGTTCCCTCTGGCTGGAACGCCCTTCCCCCCCTTCTTCACCTGGCGAACTCCTACTCGT	chr10 + 5796268 5796380	intron
mir-7205	TCGAGGGGCGTCGGGGCCAGGGAAGCTTTCAATACCGCTCTCTGACACACGCCCTCCTGC	....(((((((.(.(..((((((.((..........)))))))).).)))))))).....	chr10 - 7011172 7011232	intron	100	0	-20.4	yes		Cercopithecidae	a, b		mir-7205	intron	100	A	3		Cercopithecidae	Ref1	TCGAGGGGCGTCGGGGCCAGGGAAGCTTTCAATACCGCTCTCTGACACACGCCCTCCTGC	chr10 - 7011172 7011232	intron
mir-33a	CTGCGGTGCATTGTAGTTGCATTGCATGTTCTGGTGGTACCCATGCAATGTTTCCACAGTGCATTACAG	(((.((((((((((.(..((((((((((....(((...)))))))))))))..).)))))))))).)))	chr10 - 9172401 9172470	intron	100	0	-29.9	yes	mir-33	Vertebrates	a, b		mir-33a	intron	100	A	1	mir-33	Vertebrata	Ref1	CTGCGGTGCATTGTAGTTGCATTGCATGTTCTGGTGGTACCCATGCAATGTTTCCACAGTGCATTACAG	chr10 - 9172401 9172470	intron
mir-1281	AGGGGGCACGGGGAGGAGGTGAGTGTCTCTTGTCGCCTCCTCCTCTCCCCCCTT	((((((...(((((((((((((..........)))))))))))))..)))))).	chr10 - 10044234 10044288	space	98.15	0	-35.7	no	mir-1281	Mammals	b, c		mir-1281	space	98.15	A	0	mir-1281	Mammalia	anotation	AGGGGGCACGGGGAGGAGGTGAGTGTCTCTTGTCGCCTCCTCCTCTCCCCCCTT	chr10 - 10044234 10044288	space
mir-4766	TCTGAAAGAGCAGTTGGTGTTTATTTTTTACTAAACAGCAATCGCTCTTTTGGAAG	(((((((((((.((((.((((((........)))))).)))).)))))))))))..	chr10 + 10352656 10352712	intron	100	0	-24.3	yes	mir-4766	Primates	a, b		mir-4766	intron	100	A	1	mir-4766	Primates	Ref1	TCTGAAAGAGCAGTTGGTGTTTATTTTTTACTAAACAGCAATCGCTCTTTTGGAAG	chr10 + 10352656 10352712	intron
mir-7204	TTGGACTTTGGTGCTACCATAAAGGAATATATACTTACGATAACACCCAAGTCCGAAT	((((((((.((((........(((.........))).......)))).))))))))..	chr10 - 11085993 11086051	intron	100	0	-15.2	yes		Cercopithecidae	a, b		mir-7204	intron	100	A	1		Cercopithecidae	Ref1	TTGGACTTTGGTGCTACCATAAAGGAATATATACTTACGATAACACCCAAGTCCGAAT	chr10 - 11085993 11086051	intron
mir-9298	ACAGATGATGAACTTATTGACGGGCGGACAGAAACTGTGTGCTGATTGTCATGTTCTGATTTGGCTC	.(((((.(.((((....(((((((((.((((...)))).))))...))))).))))).)))))....	chr10 + 11881360 11881427	intron	94.03	0	-19.2	no		Mammals	b, c		mir-9298	intron	94.03	A	0		Mammalia	anotation	ACAGATGATGAACTTATTGACGGGCGGACAGAAACTGTGTGCTGATTGTCATGTTCTGATTTGGCT	chr10 + 11881360 11881427	intron
mir-6820	CCTTCTGCGGCAGAGCTGGGGTCACCAGCCCTCATGTACTTGTGACTTTTCCCCTGCCACAG	....(((.(((((.(..((((((((.((..(....)..)).))))))))..).))))).)))	chr10 - 13243157 13243219	intron	98.39	0	-21.8	no		Primates	b, c		mir-6820	intron	98.39	A	0		Primates	anotation	CCTTCTGCGGCAGAGCTGGGGTCACCAGCCCTCATGTACTTGTGACTTTTCCCCTGCCACAG	chr10 - 13243157 13243219	intron
mir-6819	GAGGGTAGGGGTGGAGGGCCAAGGAGCTGGGTGGGGTGCCAAGCCTCTGTCCCCACCCCAG	.......(((((((.((((..(((.(((.(((.....))).))).))))))))))))))..	chr10 + 14999675 14999736	intron	98.36	0	-29.6	no		Primates	b, c		mir-6819	intron	98.36	A	0		Primates	anotation	GAGGGTAGGGGTGGAGGGCCAAGGAGCTGGGTGGGGTGCCAAGCCTCTGTCCCCACCCCAG	chr10 + 14999675 14999736	intron
mir-4764	TCTTCCCCATGGATGTGGAAGGAGTTATCTGTCTCCAGTCAGATAACTGTCACTAGTCAGTTAACTCCTTCCACACCCATGGGGGAGA	((((((((((((.((((((((((((((.(((.((...(.(((....))).)...)).))).)))))))))))))).))))))))))))	chr10 + 17909740 17909828	intron	95.45	0	-55.1	no		Primates	b, c		mir-4764	intron	95.45	A	0		Primates	anotation	TCTTCCCCATGGATGTGGAAGGAGTTATCTGTCTCCAGTCAGATAACTGTCACTAGTCAGTTAACTCCTTCCACACCCATGGGGGAGA	chr10 + 17909740 17909828	intron
mir-7109	GTCTTCTGGGGGGAGGAGACCCTGCTCTCCCTGGCAGCAAGCCTCTTCTGTCCTTCCAGATCAGC	....((((((((((((((.(.(((((......)))))...).))))....)))))))))).....	chr10 + 19766509 19766574	intron	93.85	0	-23.5	no		Primates	b, c		mir-7109	intron	93.85	A	0		Primates	anotation	GTCTTCTGGGGGGAGGAGACCCTGCTCTCCCTGGCAGCAAGCCTCTTCTGTCCTTCCAGATCAGC	chr10 + 19766509 19766574	intron
mir-3200	AGAGAGACAAAGAAGGAGGTGGTCGAGGGAATCTGAGAAGGCGCACAAGGTTTGTGTCCAATACAGTCCACACCTTGCGCTACTCAGGTCTGCTCGTGCCCTCCCATGAT	..............(((((.(..((((.(.(((((((..((((((..((((((((((...)))))).....)))))))))).))))))).).))))..))))))......	chr10 - 20692039 20692149	intron	100	0	-40.1	yes	mir-3200	Mammals	a, b		mir-3200	intron	100	A	1	mir-3200	Mammalia	Ref1	AGAGAGACAAAGAAGGAGGTGGTCGAGGGAATCTGAGAAGGCGCACAAGGTTTGTGTCCAATACAGTCCACACCTTGCGCTACTCAGGTCTGCTCGTGCCCTCCCATGAT	chr10 - 20692039 20692149	intron
mir-6818	CTATTTTGTGTGAGTACAGAGAGCATCTGAATGGGTACAGTTGTTGTCTCTTATTTCTCACACAG	......((((((((...((((((((.(((........))).)))..))))).....)))))))).	chr10 - 21451690 21451755	intron	96.92	0	-20.9	no		Primates	b, c		mir-6818	intron	96.92	A	0		Primates	anotation	CTATTTTGTGTGAGTACAGAGAGCATCTGAATGGGTACAGTTGTTGTCTCTTATTTCTCACACAG	chr10 - 21451690 21451755	intron
mir-3199-1	GGTGACTCCCTGGAACTGCCTTAGGAGAAAGTTTCTGGAAGTTTTGACATTCCAGAAACCTTCTCCTAAGGCAGTCCCTGGGAGTCACT	((((((((((.((.(((((((((((((((.((((((((((((....)).)))))))))).))))))))))))))).)).))))))))))	chr10 + 23605443 23605532	space	95.45	1	-65	no	mir-3199	Primates	b, c		mir-3199-1	space	95.45	B	0	mir-3199	Primates	anotation	GGTGACTCCCTGGAACTGCCTTAGGAGAAAGTTTCTGGAAGTTTTGACATTCCAGAAACCTTCTCCTAAGGCAGTCCCTGGGAGTCACT	chr10 + 23605443 23605532	space
mir-3199-2	GTGACTCCCAGGGACTGCCTTAGGAGAAGGTTTCTGGAATGTCAAAACTTCCAGAAACTTTCTCCTAAGGCAGTTCCAGGGAGTCAC	(((((((((.(((((((((((((((((((((((((((((.((....))))))))))))))))))))))))))))))).)))))))))	chr10 - 23605444 23605531	intron	95.35	1	-70.8	no	mir-3199	Primates	b		mir-3199-2	intron	95.35	B	0	mir-3199	Primates		GTGACTCCCAGGGACTGCCTTAGGAGAAGGTTTCTGGAATGTCAAAACTTCCAGAAACTTTCTCCTAAGGCAGTTCCAGGGAGTCAC	chr10 - 23605444 23605531	intron
mir-6817	AGGATCCTGCCATAGGAAGCTTGGAGTGGAACTGACCTGCCCCCTTTCTCTCTGTCTCCATGGCAG	......(((((((.(((.((..((((.((.............))...))))..)).))))))))))	chr10 - 26122332 26122398	intron	96.97	0	-20.1	no		Primates	b		mir-6817	intron	96.97	A	0		Primates		AGGATCCTGCCATAGGAAGCTTGGAGTGGAACTGACCTGCCCCCTTTCTCTCTGTCTCCATGGCAG	chr10 - 26122332 26122398	intron
mir-6817	AGGATCCTGCCATAGGAAGCTTGGAGTGGAACTGACCTGCCCCCTTTCTCTCTGTCTCCATGGCAG	......(((((((.(((.((..((((.((.............))...))))..)).))))))))))	chr10 + 26701580 26701646	intron	96.97	0	-20.1	no		Primates	b, c		mir-6817	intron	96.97	A	0		Primates	anotation	AGGATCCTGCCATAGGAAGCTTGGAGTGGAACTGACCTGCCCCCTTTCTCTCTGTCTCCATGGCAG	chr10 + 26701580 26701646	intron
mir-5571	ATCTGACTCAAAATATGAACCAAGCAATTCTCAAAGGGGCCTCCCAGGAAATTCACTTTAGGAAGTCCTACAAGGCTCCTCTGAGAGTTGCTAAAACAAAACATTGACAGCCC	..(((..((((...........(((((((((((.((((((((...((((..(((......)))..))))...)))))))).)))))))))))...........)))))))...	chr10 - 28459392 28459505	intron	93.81	1	-38.5	no		Primates	b		mir-5571	intron	93.81	B	0		Primates		ATCTGACTCAAAATATGAACCAAGCAATTCTCAAAGGGGCCTCCCAGGAAATTCACTTTAGGAAGTCCTACAAGGCTCCTCTGAGAGTTGCTAAAACAAAACATTGACAGCCC	chr10 - 28459392 28459505	intron
mir-650a-1	CAGTGCTGGGATCTCAGGAGGCAGCGCTCTCAGGACGTCTCCACCATGGCCTGGGCTCTGGTCCTCCTCACCCTCCTCACTCAGGGCACAGGTGA	..(((((((((....(((((((((.((.(.((((.(((.......))).))))))).)))..)))))).....)))).......)))))......	chr10 - 28649675 28649770	intron	98.95	0	-30	no	mir-650	Primates	a, b		mir-650a-1	intron	98.95	A	0	mir-650	Primates	Ref1	CAGTGCTGGGATCTCAGGAGGCAGCGCTCTCAGGACGTCTCCACCATGGCCTGGGCTCTGGTCCTCCTCACCCTCCTCACTCAGGGCACAGGTGA	chr10 - 28649675 28649770	intron
mir-650	CAGTGCTGGGGTCTCAGGAGGCAGCGCTCTCAGGACGTCTCCACCATGGCCTGGGCTCTGCTCCTCCTCACCCTCCTCACTCAGGGCACAGGTGAC	..((((((((((...((((((.((((..((((((.(((.......))).))))))...)))))))))).)))))..........))))).......	chr10 - 28714462 28714558	intron	97.92	0	-35.5	no	mir-650	Primates	a, b		mir-650	intron	97.92	A	0	mir-650	Primates	Ref1	CAGTGCTGGGGTCTCAGGAGGCAGCGCTCTCAGGACGTCTCCACCATGGCCTGGGCTCTGCTCCTCCTCACCCTCCTCACTCAGGGCACAGGTGAC	chr10 - 28714462 28714558	intron
mir-650d	CAGTGCTGGGGTCTCAGGAGACAGTGCTGTTGGGAAGTCTCCACCATGGCCTGGGCTCTGCTCCTCCTCACCCTCCTCACTCAAGGCACAGG	..((((((((((...(((((.(((.(((...(((..((.......))..))).))).))))))))....)))))..........)))))...	chr10 - 28735128 28735220	intron	96.74	1	-29.3	no	mir-650	Primates	a		mir-650d	intron	96.74	B	0	mir-650	Primates	Ref1	CAGTGCTGGGGTCTCAGGAGACAGTGCTGTTGGGAAGTCTCCACCATGGCCTGGGCTCTGCTCCTCCTCACCCTCCTCACTCAAGGCACAGG	chr10 - 28735128 28735220	intron
mir-650b	CAGTGCTGGGGTCTCAGAAGGCAGCGCTCTCGGGACATCTCCACCATGGCCTGGGCTCTGCTCCTCCTCACCCTCCTCACTCAGGGCACAGGTGA	..((((((((((...((.(((.((((..((((((.(((.......))).))))))...))))))).)).)))))..........)))))......	chr10 - 28779184 28779279	intron	96.84	1	-28.3	no	mir-650	Primates	a, b		mir-650b	intron	96.84	B	0	mir-650	Primates	Ref1	CAGTGCTGGGGTCTCAGAAGGCAGCGCTCTCGGGACATCTCCACCATGGCCTGGGCTCTGCTCCTCCTCACCCTCCTCACTCAGGGCACAGGTGA	chr10 - 28779184 28779279	intron
mir-650c	CAGTGCTGGGGTCTCAGGAGGCAGGGCTCTCAGTCTCCACCATAGCCTGGGCTCTGCTCCTCCTCACTCTCCTCACTCAGGGCACGGATGA	..(((((((((....((((((((((((.(.(((.((.......)).)))))))))))..)))))....))))........)))))......	chr10 - 28907319 28907410	intron	97.8	1	-31	no	mir-650	Primates	a		mir-650c	intron	97.8	B	0	mir-650	Primates	Ref1	CAGTGCTGGGGTCTCAGGAGGCAGGGCTCTCAGTCTCCACCATAGCCTGGGCTCTGCTCCTCCTCACTCTCCTCACTCAGGGCACGGATGA	chr10 - 28907319 28907410	intron
mir-130b	GGCCTGCCCGACACTCTTTCCCTGTTGCACTACTGTGGGCCACTGGGAAGCAGTGCAATGATGAAAGGGCATCGGTCAGGTC	((((((.((((..(((((((..(((((((((.((..((....))....)).)))))))))..)))))))..)))).))))))	chr10 - 30075091 30075173	space	100	0	-35.2	yes	mir-130	Vertebrates	a, b		mir-130b	space	100	A	1	mir-130	Vertebrata	Ref1	GGCCTGCCCGACACTCTTTCCCTGTTGCACTACTGTGGGCCACTGGGAAGCAGTGCAATGATGAAAGGGCATCGGTCAGGTC	chr10 - 30075091 30075173	space
mir-301b	CCGCAGGTGCTCTGACGAGGTTGCACTACTGTGCTCTGAGAAGCAGTGCAATGATATTGTCAAAGCATCTGGGACCA	((.((((((((.((((((.((((((((.((...........)).))))))))....)))))).))))))))))....	chr10 - 30075416 30075493	space	100	0	-30.9	yes	mir-130	Vertebrates	a, b		mir-301b	space	100	A	1	mir-130	Vertebrata	Ref1	CCGCAGGTGCTCTGACGAGGTTGCACTACTGTGCTCTGAGAAGCAGTGCAATGATATTGTCAAAGCATCTGGGACCA	chr10 - 30075416 30075493	space
mir-649	GGCCTAGCCAAATACTGTATTTTTTATCAACATTTGGTTGAAAAACATCTGTGTATTAGTAAACCTGTGTTGTTCAAGAGTCCGCTGTGCTTTGCTG	(((..(((...(((.((.((((((...((((((..((((.....(((....))).......)))).))))))...)))))).)).))))))..))).	chr10 - 30627622 30627719	intron	98.97	0	-17.1	no	mir-649	Primates	a, b		mir-649	intron	98.97	A	0	mir-649	Primates	Ref1 Ref2	GGCCTAGCCAAATACTGTATTTTTTATCAACATTTGGTTGAAAAACATCTGTGTATTAGTAAACCTGTGTTGTTCAAGAGTCCGCTGTGCTTTGCTG	chr10 - 30627622 30627719	intron
mir-6816	CCGAGTGGGGCGGGGTGGGTCCCTGCAGGGACTGTGACACTGAAGGACCTGCACCTCCGCCCACAG	....(((((.((((((((((((.(.((((........).)))).)))))..)))).))))))))..	chr10 + 31328058 31328124	intron	95.45	1	-31.3	yes		Primates	b, c		mir-6816	intron	95.45	B	2		Primates	anotation	CCGAGTGGGGCGGGGTGGGTCCCTGCAGGGACTGTGACACTGAAGGACCTGCACCTCCGCCCACAG	chr10 + 31328058 31328124	intron
mir-1306	TTCCAAGCGCTGCCCCGTGAGCAGTCTCCACCACCTCCCCTGCAAACGTCCAGTGGTGCAGAGGTAATGGACGTTGGCTCTGGTGGTGATGGACAGTCCGAACTCCCTG	........(((((.......))))).((((.((((.((...((.((((((((.((.(.....).)).)))))))).))...)).)))).))))................	chr10 - 31357983 31358092	CDS	100	0	-34.3	yes	mir-1306	Vertebrates	a, b		mir-1306	cds	100	A	1	mir-1306	Vertebrata	Ref1 Ref2	TTCCAAGCGCTGCCCCGTGAGCAGTCTCCACCACCTCCCCTGCAAACGTCCAGTGGTGCAGAGGTAATGGACGTTGGCTCTGGTGGTGATGGACAGTCCGAACTCCCTG	chr10 - 31357983 31358092	cds
mir-3618	TAAGCTGAGTGCATTGTGATTTCCAATAATTGAGGCAGTGGTTCTAAAAGCTGTCTACATTAATGAAAAGAGCAATGTGGCCAGCTTG	(((((((..((((((((..(((.((.((((..(((((((..........)))))))..)))).)).)))..))))))))..)))))))	chr10 - 31358300 31358388	intron	100	0	-29.9	no	mir-3618	Vertebrates	b, c		mir-3618	intron	100	A	0	mir-3618	Vertebrata	anotation	TAAGCTGAGTGCATTGTGATTTCCAATAATTGAGGCAGTGGTTCTAAAAGCTGTCTACATTAATGAAAAGAGCAATGTGGCCAGCTTG	chr10 - 31358300 31358388	intron
mir-185	AGGGCGCGAGGGATTGGAGAGAAAGGCAGTTCCTGATGGTCCCCTCCTCAGGGGCTGGCTTTCCTCTGGTCCTTCCCTCCCA	.(((.(.((((((((((((.(((((.((((((((((.((......)))))))))))).))))))))))))))))).).))).	chr10 - 31411899 31411981	intron	100	0	-51.1	yes	mir-185	Mammals	a, b		mir-185	intron	100	A	1	mir-185	Mammalia	Ref1	AGGGCGCGAGGGATTGGAGAGAAAGGCAGTTCCTGATGGTCCCCTCCTCAGGGGCTGGCTTTCCTCTGGTCCTTCCCTCCCA	chr10 - 31411899 31411981	intron
mir-648	AGCACAGACGCCTCCAAGTGTGCAGGGCACTGATGGGGGCCAGGGCAGGCCCAGCCAAAGTGCAGGACCTGGCACTTAGTCGGAGGTGAGGATG	........(((((((((((((.(((((((((..((((((((......)))))..))).)))))....))))))))))....)))))))......	chr10 + 32758521 32758615	intron	98.94	0	-42.6	no	mir-648	Primates	a		mir-648	intron	98.94	A	0	mir-648	Primates	Ref1	AGCACAGACGCCTCCAAGTGTGCAGGGCACTGATGGGGGCCAGGGCAGGCCCAGCCAAAGTGCAGGACCTGGCACTTAGTCGGAGGTGAGGATG	chr10 + 32758521 32758615	intron
mir-3192	GGAAGGGATTCTGGGAGGTTGTAGCAGTGGAAAAATTCCTTTTTTCCTCTGATCGCCCTTTCAGCTCTTTCCTTCTG	((((((((..((((((((.((...(((.(((((((.....))))))).)))..)).))))))))....)))))))).	chr10 - 43786457 43786534	intron	94.81	0	-30.4	no	mir-3192	Primates	b, c		mir-3192	intron	94.81	A	0	mir-3192	Primates	anotation	GGAAGGGATTCTGGGAGGTTGTAGCAGTGGAAAAATTCCTTTTTTCCTCTGATCGCCCTTTCAGCTCTTTCCTTCT	chr10 - 43786457 43786534	intron
mir-6870	CAAAGTGGGGGAGATGCGGGTTGAACTTCATTTCTCATGCTCATCCCCATCTCCTTTCAG	......((((((((((.(((.(((.(............).))).)))))))))))))...	chr10 + 51845990 51846050	intron	96.67	0	-20.5	no		Primates	b, c		mir-6870	intron	96.67	A	0		Primates	anotation	CAAAGTGGGGGAGATGCGGGTTGAACTTCATTTCTCATGCTCATCCCCATCTCCTTTCAG	chr10 + 51845990 51846050	intron
mir-103a-2	CTTTGTGCTTTCAGCTTCTTTACAGTGCTGCCTTGTAGCATTCAGGTCAAGCAGCATTGTACAGGGCTATGAAAGAACCAAGAA	(((.((.(((((((((.((.(((((((((((.(((.(.(.....).))))))))))))))).)))))..)))))).)).)))..	chr10 - 58559248 58559332	intron	100	0	-30.2	yes	mir-103	Vertebrates	a, b		mir-103a-2	intron	100	A	5	mir-103	Vertebrata	Ref1	CTTTGTGCTTTCAGCTTCTTTACAGTGCTGCCTTGTAGCATTCAGGTCAAGCAGCATTGTACAGGGCTATGAAAGAACCAAGAA	chr10 - 58559248 58559332	intron
mir-103b-2	TCATAGCCCTGTACAATGCTGCTTGACCTGAATGCTACAAGGCAGCACTGTAAAGAAGCTGA	...((((.((.((((.((((((((...............)))))))).)))).))..)))).	chr10 + 58559260 58559322	space	100	0	-18.3	no	mir-103	Vertebrates	b, c		mir-103b-2	space	100	A	0	mir-103	Vertebrata	anotation	TCATAGCCCTGTACAATGCTGCTTGACCTGAATGCTACAAGGCAGCACTGTAAAGAAGCTGA	chr10 + 58559260 58559322	space
mir-1825	AGAGACTGGGGTGCTGGGCACCCCTAGACTAGGACTCCAGTGCCCTCCTCTCC	.((((..(((((((((((....((((...))))..)))))))))))..)))).	chr10 + 63572029 63572082	space	98.11	0	-24.6	no	mir-1825	Primates	b		mir-1825	space	98.11	A	0	mir-1825	Primates		AGAGACTGGGGTGCTGGGCACCCCTAGACTAGGACTCCAGTGCCCTCCTCTCC	chr10 + 63572029 63572082	space
mir-644	TTTTATTTAGTATTCTTCCATCAGTGTTCATAAGGGATGTTGGTCTGTAGTTTTCTTATAGTGTGGCTTGCTTAGAGCAAAGGTGGTTCCCT	.................(((((..(((((.((((.((.((((..((((((.....))))))..)))))).)))))))))..)))))......	chr10 + 65891158 65891250	intron	100	0	-21.1	no	mir-644	Primates	a		mir-644	intron	100	A	0	mir-644	Primates	Ref1	TTTTATTTAGTATTCTTCCATCAGTGTTCATAAGGGATGTTGGTCTGTAGTTTTCTTATAGTGTGGCTTGCTTAGAGCAAAGGTGGTTCCCT	chr10 + 65891158 65891250	intron
mir-499	GCCCTGTCCCCCGTGTCTTGGGCGGGCAGCTGTTAAGACTTGCAGTGATGTTTAACTCCTCTCCACGTGAACATCACAGCAAGTCTGTGCTGCTTCCCGTCCCTACGCTGCCTGGGCAGGGT	(((((((((.(.((((...(((((((.(((.((..((((((((.((((((((((.............)))))))))).))))))))..)).))).)))))))..)))).)...)))))))))	chr10 + 66422013 66422135	intron	100	0	-64.2	yes	mir-499	Vertebrates	a, b		mir-499	intron	100	A	1	mir-499	Vertebrata	Ref1	GCCCTGTCCCCCGTGTCTTGGGCGGGCAGCTGTTAAGACTTGCAGTGATGTTTAACTCCTCTCCACGTGAACATCACAGCAAGTCTGTGCTGCTTCCCGTCCCTACGCTGCCTGGGCAGGGT	chr10 + 66422013 66422135	intron
mir-499b	GGAAGCAGCACAGACTTGCTGTGATGTTCACGTGGAGAGGAGTTAAACATCACTGCAAGTCTTAACAGCTGCC	....(((((..((((((((.((((((((.((.(......).))..)))))))).)))))))).....))))).	chr10 - 66422037 66422110	space	98.63	0	-29.6	no	mir-499	Vertebrates	b, c		mir-499b	space	98.63	A	0	mir-499	Vertebrata	anotation	GGAAGCAGCACAGACTTGCTGTGATGTTCACGTGGAGAGGAGTTAAACATCACTGCAAGTCTTAACAGCTGCC	chr10 - 66422037 66422110	space
mir-1289-1	TTCTCAATTTTTAGTAGGAATTAAAAACAAAACTGGTAAATGCAGACTCTTGGATTCCACCCCCAGAGAATCCGTAAACCGGGGGTGGAGTCCAGGAATCTGCATTTTAGAAAGTACCCAGGGCGATTCTGATACATGGGGAACA	((((((.((((((((....))))))))....(((...(((((((((.(((((((((((((((((................))))))))))))))))).))))))))).....)))...((((.....)))).....))))))...	chr10 - 66930657 66930802	intron	97.22	0	-54.5	no	mir-1289	Mammals	b		mir-1289-1	intron	97.22	A	0	mir-1289	Mammalia		TTCTCAATTTTTAGTAGGAATTAAAAACAAAACTGGTAAATGCAGACTCTTGGATTCCACCCCCAGAGAATCCGTAAACCGGGGGTGGAGTCCAGGAATCTGCATTTTAGAAAGTACCCAGGGCGATTCTGATACATGGGGAACA	chr10 - 66930657 66930802	intron
mir-6812	TGAGGATGGGGTGAGATGGGGAGGAGCAGCCAGTCCTGTCTCACCGCTCTTCCCCTGACCCCAG	......((((((.(...((((((((((.(..((......))..).))))))))))).)))))).	chr10 + 77143080 77143144	intron	100	0	-30.3	no		Primates	b, c		mir-6812	intron	100	A	0		Primates	anotation	TGAGGATGGGGTGAGATGGGGAGGAGCAGCCAGTCCTGTCTCACCGCTCTTCCCCTGACCCCAG	chr10 + 77143080 77143144	intron
mir-3617	TGTCTTACTCAAGGTCATAGAAAGACATAGTTGCAAGATGGGATTAGAAACCATATGTCTCATCAGCACCCTATGTTCTTTCTGTGCCCTGGGAGCACACTCCATTTAGCAG	...........(((.(((((((((((((((.(((..((((((((............)))))))).)))..))))).)))))))))).))).((((....)))).........	chr10 - 77390737 77390849	space	98.21	0	-37.9	no	mir-3617	Primates	b		mir-3617	space	98.21	A	0	mir-3617	Primates		TGTCTTACTCAAGGTCATAGAAAGACATAGTTGCAAGATGGGATTAGAAACCATATGTCTCATCAGCACCCTATGTTCTTTCTGTGCCCTGGGAGCACACTCCATTTAGCAG	chr10 - 77390737 77390849	space
mir-12122	GAGCAGTTTGTTTCACAGATGGCCGGAAGAGACTCTTTTGCCTGGTTACAGGCATATTTTTCTGCCATCCTGTTGAATTTTCCCATCAACTCCTT	((.......((((.(((((((((.((((((........((((((....))))))..)))))).))))).)))).)))).......))........	chr10 + 81642698 81642793	intron	97.89	1	-27.7	no		Primates	b, c		mir-12122	intron	97.89	B	0		Primates	anotation	GAGCAGTTTGTTTCACAGATGGCCGGAAGAGACTCTTTTGCCTGGTTACAGGCATATTTTTCTGCCATCCTGTTGAATTTTCCCATCAACTCCTT	chr10 + 81642698 81642793	intron
mir-3194	AGGTGGCAGGGCCAGCCACCAGGCAGGCTGCGTGCCACCCGGGCAGCTCTGCTACTCACCGGCAGTGTCACCT	((((((((..(((........((((((((((.((.....)).))))).))))).......)))..))))))))	chr10 - 83294204 83294277	intron	94.52	2	-35.2	no		Primates	b		mir-3194	intron	94.52	C	0		Primates		AGGTGGCAGGGCCAGCCACCAGGCAGGCTGCGTGCCACCCGGGCAGCTCTGCTACTCACCGGCAGTGTCACCT	chr10 - 83294204 83294277	intron
mir-296	AGGACCCTTCCGGAGGGCCCCCCCTCAATCCTGTTGTGCCTAATTCAGAGGGTTGGGTGGAGGCTCTCCTGAAGGGCTCT	.(((((((((.((((((((.((.(((((((((.(((.........)))))))))))).)).)))))))).)))))).)))	chr10 - 90709107 90709187	space	100	0	-45	yes	mir-296	Mammals	a, b		mir-296	space	100	A	1	mir-296	Mammalia	Ref1	AGGACCCTTCCGGAGGGCCCCCCCTCAATCCTGTTGTGCCTAATTCAGAGGGTTGGGTGGAGGCTCTCCTGAAGGGCTCT	chr10 - 90709107 90709187	space
mir-298	TCAGGTCTTCAGCAGAAGCCGGGTGGTTCTCCCAGTGGTTTTCCTTGACTGTGAGGAACTAGCCTGCTGTTTTGCTCAGGAATGAGCT	(((..((((.(((((((((.((.(((((((.(((((.(.......).)))).).))))))).)).)))..)))))).)))).)))...	chr10 - 90709703 90709791	space	100	0	-31.9	no	mir-298	Mammals	a		mir-298	space	100	A	0	mir-298	Mammalia	Ref1	TCAGGTCTTCAGCAGAAGCCGGGTGGTTCTCCCAGTGGTTTTCCTTGACTGTGAGGAACTAGCCTGCTGTTTTGCTCAGGAATGAGCT	chr10 - 90709703 90709791	space
mir-4758	GGTGAGTAGGAGCCGGTGGGGCTGGAGTAAGGGCACGCCCGGGGCTGCCCCACCTGCTGACCACCCTCCCC	((((.((...(((.((((((((...(((..(((....)))...))))))))))).))).))))))......	chr10 - 94309094 94309165	intron	98.59	0	-33.6	no		Primates	b, c		mir-4758	intron	98.59	A	0		Primates	anotation	GGTGAGTAGGAGCCGGTGGGGCTGGAGTAAGGGCACGCCCGGGGCTGCCCCACCTGCTGACCACCCTCCCC	chr10 - 94309094 94309165	intron
mir-1-1	GCTTGGGAAACATACTTCTTTATATGCCCATATGGACCTGCTAAGCTATGGAATGTAAAGAAGTATGTATCTCAGGC	((((((((.((((((((((((((((..((((((((.....)))...))))).)))))))))))))))).))))))))	chr10 + 94549029 94549106	space	100	0	-35.7	yes	mir-1	Vertebrates	a, b		mir-1-1	space	100	A	1	mir-1	Vertebrata	Ref1	GCTTGGGAAACATACTTCTTTATATGCCCATATGGACCTGCTAAGCTATGGAATGTAAAGAAGTATGTATCTCAGGC	chr10 + 94549029 94549106	space
mir-133a-2	GGGAGCCAAATGCTTTGCTAGAGCTGGTAAAATGGAACCAAATCGACTGTCCAATGGATTTGGTCCCCTTCAACCAGCTGTAGCTGTGCATTGATGGCGCCG	.((.(((((((((...((((.(((((((..((.((.((((((((.(........).)))))))).)).))..))))))).))))...)))))..)))).)).	chr10 + 94559647 94559749	space	100	0	-47.8	no	mir-133	Vertebrates	a, b		mir-133a-2	space	100	A	0	mir-133	Vertebrata	Ref1	GGGAGCCAAATGCTTTGCTAGAGCTGGTAAAATGGAACCAAATCGACTGTCCAATGGATTTGGTCCCCTTCAACCAGCTGTAGCTGTGCATTGATGGCGCCG	chr10 + 94559647 94559749	space
mir-647	AGAAAGTGTTGGCCTGTGGCTCCACTCACTTCCATCAGCCCCAGAAAGCCTTGGTGGGGGGCAGGAGGGAGGGCCAGGCAGGGCTGGGGACCTG	........(((((((....((((.....(((((((((((........))..)))))))))...))))...))))))).((((........))))	chr10 - 96155138 96155232	intron	93.62	1	-33.8	no	mir-647	Primates	c		mir-647	intron	93.62	B	0	mir-647	Primates	anotation	AGAAAGTGTTGGCCTGTGGCTCCACTCACTTCCATCAGCCCCAGAAAGCCTTGGTGGGGGGCAGGAGGGAGGGCCAGGCAGGGCTGGGGACCTG	chr10 - 96155138 96155232	intron
mir-6813	ACAGGCAGGGGCTGGGGTTTCAGGTTCTCAGTCAGAACCTTGGCCCCTCTCCCCAG	.......((((..((((((..(((((((.....))))))).))))))...))))..	chr10 - 96296378 96296434	intron	96.43	0	-26.4	yes		Primates	b		mir-6813	intron	96.43	A	1		Primates		ACAGGCAGGGGCTGGGGTTTCAGGTTCTCAGTCAGAACCTTGGCCCCTCTCCCCAG	chr10 - 96296378 96296434	intron
mir-650a-1	CAGTGCTGGGGTCTCAGAAGGCAGCGCTCTCAGGACGTCTCCACCATGGCCTGGACTCTGCTCCTCGTCACCCTCCTCACTCAGGGCACAGGTGA	..((((((((((..(((..(((((.(.((.((((.(((.......))).))))))).))))).)).)..)))))..........)))))......	chr10_AQIA01009600_random + 7635 7730	space	95.79	1	-26.5	no	mir-650	Primates	a, b		mir-650a-1	space	95.79	B	0	mir-650	Primates	Ref1	CAGTGCTGGGGTCTCAGAAGGCAGCGCTCTCAGGACGTCTCCACCATGGCCTGGACTCTGCTCCTCGTCACCCTCCTCACTCAGGGCACAGGTGA	chr10_AQIA01009600_random + 7635 7730	space
mir-769	CTGATTCCTGGGCTCTGACCTGAGACCTCTGGGTTCTGAGCTGTGATGTTGCTCTCGAGCTGGGATCTCCGGGGTCTTGGTTCAGGGCCGGGGCCTCTGGGTTCCAAGCAC	..........((((((((.((((((((((.(((.(((.((((.(((........))))))).))).))).)))))))))).))))))))((((((....))))))......	chr10_KE145718_random - 9245 9356	space	100	0	-53.2	yes	mir-769	Mammals	a, b		mir-769	space	100	A	1	mir-769	Mammalia	Ref1	CTGATTCCTGGGCTCTGACCTGAGACCTCTGGGTTCTGAGCTGTGATGTTGCTCTCGAGCTGGGATCTCCGGGGTCTTGGTTCAGGGCCGGGGCCTCTGGGTTCCAAGCAC	chr10_KE145718_random - 9245 9356	space
mir-1302-11	GGATGCCCAGTTAGTTTGAATTTTAGATAAACAACGAAGAATTTCTTAGCATAAATATGTCCCAAGCTTAGTTTGGGACATACTTATGCTAAAAGTATTATTGGTGGTTTATCTGAGATTCAAAATTAAGCATTTTA	.(((((....((((((((((((((((((((((.((.((.(((...(((((((((.((((((((((((...)))))))))))).)))))))))....))).)).)).))))))))))))))).))))))))))))...	chr11 + 10538 10675	space	95.62	0	-55.3	no	mir-1302	Mammals	b		mir-1302-11	space	95.62	A	0	mir-1302	Mammalia		GGATGCCCAGTTAGTTTGAATTTTAGATAAACAACGAAGAATTTCTTAGCATAAATATGTCCCAAGCTTAGTTTGGGACATACTTATGCTAAAAGTATTATTGGTGGTTTATCTGAGATTCAAAATTAAGCATTTT	chr11 + 10538 10675	space
mir-3649	ACTTGGACCAGGCACCTGTGTGTGCCCAAGTGTTTCTAGCAAACACGGGGACCCGAGTGTCTAAGC	.((((((((.((..(((((((.(((...((.....)).))).)))))))..))...).))))))).	chr11 - 1775632 1775698	space	93.94	1	-25	no		Primates	b, c		mir-3649	space	93.94	B	0		Primates	anotation	ACTTGGACCAGGCACCTGTGTGTGCCCAAGTGTTTCTAGCAAACACGGGGACCCGAGTGTCTAAGC	chr11 - 1775632 1775698	space
mir-1268a	TAGCCGGACGTGGTGGTGGCGGCGCCTGTGGTCCCAGCTACTCGGAGGCTGAGG	(((((...((.((((((((.(((.......)))))).)))))))..)))))...	chr11 - 1863320 1863374	space	94.23	2	-21	no	mir-1268	Primates	b		mir-1268a	space	94.23	C	0	mir-1268	Primates		TAGCCGGACGTGGTGGTGGCGGCGCCTGTGGTCCCAGCTACTCGGAGGCTGAG	chr11 - 1863320 1863374	space
mir-7163	GTGACAAGCTTGGGCTCTGAAATCAGACAGCCCCAAGTTTGAAACCT	((..(((((((((((((((....))))..).))))))))))..))..	chr11 - 3655729 3655776	space	100	0	-18.5	no		Cercopithecidae	a, b		mir-7163	space	100	A	0		Cercopithecidae	Ref1	GTGACAAGCTTGGGCTCTGAAATCAGACAGCCCCAAGTTTGAAACCT	chr11 - 3655729 3655776	space
mir-4669	GCCTCCCTTCACTTCCTGGCCATCCAAAGCATCTGTGTCTCTGCGTCCGGGAAGTCGAGGAGGGC	((((.((((.((((((((((((......((....)).....)).).))))))))).)))).))))	chr11 - 6575339 6575404	space	95.16	2	-26.1	no		Primates	b, c		mir-4669	space	95.16	C	0		Primates	anotation	GCCTCCCTTCACTTCCTGGCCATCCAAAGCATCTGTGTCTCTGCGTCCGGGAAGTCGAGGAGGGC	chr11 - 6575339 6575404	space
mir-7045	GAAAGAGCGGGTGGGTGTGGGGGAGGGGGACAGTGCGCGTCACTGACTGTTCTCTGTTTCTCCCCCCTCCCCCGCACAG	..............(((((((((((((((((((.(.(((((...))).)).).)))).....)))))))))))))))..	chr11 - 6891910 6891989	space	98.41	0	-41.6	no		Mammals	b		mir-7045	space	98.41	A	0		Mammalia		GAAAGAGCGGGTGGGTGTGGGGGAGGGGGACAGTGCGCGTCACTGACTGTTCTCTGTTTCTCCCCCCTCCCCCGCACAG	chr11 - 6891910 6891989	space
mir-200c	CCCTCGTCTTACCCAGCAGTGTTTGGGTGCGGTTGGGAGTCTCTAATACTGCCGGGTAATGATGGAGG	.(((((((((((((.((((((((.(((.((........))))).)))))))).)))))).))).))))	chr11 + 7274754 7274822	space	100	0	-30.8	yes	mir-8	Vertebrates	a, b		mir-200c	space	100	A	1	mir-8	Vertebrata	Ref1	CCCTCGTCTTACCCAGCAGTGTTTGGGTGCGGTTGGGAGTCTCTAATACTGCCGGGTAATGATGGAGG	chr11 + 7274754 7274822	space
mir-141	TGGCCGGCCCTGGGTCCATCTTCCAGTACAGTGTTGGATGGTCTAATTGTGAAGCTCCTAACACTGTCTGGTAAAGATGGCCCCCGGGTCGGTTT	.(((((((((.(((.(((((((((((.(((((((((((...((.......))...))).))))))))))))..))))))).))).))))))))).	chr11 + 7275151 7275246	space	100	0	-53.3	yes	mir-8	Vertebrates	a, b		mir-141	space	100	A	1	mir-8	Vertebrata	Ref1	TGGCCGGCCCTGGGTCCATCTTCCAGTACAGTGTTGGATGGTCTAATTGTGAAGCTCCTAACACTGTCTGGTAAAGATGGCCCCCGGGTCGGTTT	chr11 + 7275151 7275246	space
mir-7163	GTGACAAGCTTGGGCTCTGAGATCAGACAGCCCCAAGTTTGAAACCT	((..(((((((((((((((....))))..).))))))))))..))..	chr11 + 9806033 9806080	space	97.87	0	-18.5	no		Cercopithecidae	a, b		mir-7163	space	97.87	A	0		Cercopithecidae	Ref1	GTGACAAGCTTGGGCTCTGAGATCAGACAGCCCCAAGTTTGAAACCT	chr11 + 9806033 9806080	space
mir-762-3	GCCCGGCTCCGGGTCTCGGCCCGTACGGTCCGGCCGGCCATGCTGGCGTGGCTGGGGCCGGAGCCGAGCCC	....(((((.((.((.((((((...(((((..((((((...))))))..))))))))))))).))))))).	chr11 - 10971830 10971901	intron	98.59	1	-45.9	no	mir-762	Vertebrates	a, b		mir-762-3	intron	98.59	B	0	mir-762	Vertebrata	Ref1	GCCCGGCTCCGGGTCTCGGCCCGTACGGTCCGGCCGGCCATGCTGGCGTGGCTGGGGCCGGAGCCGAGCCC	chr11 - 10971830 10971901	intron
mir-614	TCTAAGAAACACAGTGGTCTCTGGAGCCCGCACAAGCAGGCCAGCCCTGCACTGAATGCCTGTTCTTGCCAGGTGGCCGAAGGTTGCTGC	...........(((((((((.(((.(((.(((..((((((((((.......)))...)))))))..)))..)))..))).))))))))).	chr11 + 13516146 13516236	space	93.26	1	-28.2	no	mir-614	Primates	c		mir-614	space	93.26	B	0	mir-614	Primates	anotation	TCTAAGAAACACAGTGGTCTCTGGAGCCCGCACAAGCAGGCCAGCCCTGCACTGAATGCCTGTTCTTGCCAGGTGGCCGAAGGTTGCTGC	chr11 + 13516146 13516236	space
mir-920	GTAGTTGTTCTACAGAAGACCTGGATGTGGAAGAGCTAAGACACACTCCAGGGGAGCTGTGGAAGCGGTAACACG	((.((((((((((((....((((((((((............)))).))))))....))))))))....)))))).	chr11 + 24848147 24848222	space	98.67	0	-26.7	no	mir-920	Primates	a, b		mir-920	space	98.67	A	0	mir-920	Primates	Ref1	GTAGTTGTTCTACAGAAGACCTGGATGTGGAAGAGCTAAGACACACTCCAGGGGAGCTGTGGAAGCGGTAACACG	chr11 + 24848147 24848222	space
mir-4302	TTAGGAGGGACCAATGTGGCTCAGCGAGGTGGCTGAGTTTACTTAAGGGATTGGAATGAG	..........(((((.(((((((((......))))))))........).)))))......	chr11 - 26533260 26533320	space	95	1	-15.6	no		Primates	b, c		mir-4302	space	95	B	0		Primates	anotation	TTAGGAGGGACCAATGTGGCTCAGCGAGGTGGCTGAGTTTACTTAAGGGATTGGAATGAG	chr11 - 26533260 26533320	space
mir-4494	AGTTTTAGTTACCCCTGGTCAGCTGCAGTCTGAAAATATGAAATGGAAAATTCCAGACTGTGGCTGACCAGGGGTAACTGAAACC	.(((((((((((((((((((((((((((((((.....................))))))))))))))))))))))))))))))).	chr11 - 46085345 46085430	space	95.24	1	-57.1	no		Primates	b		mir-4494	space	95.24	B	0		Primates		AGTTTTAGTTACCCCTGGTCAGCTGCAGTCTGAAAATATGAAATGGAAAATTCCAGACTGTGGCTGACCAGGGGTAACTGAAACC	chr11 - 46085345 46085430	space
mir-6505	TTGGAATAGGGGATATCTCAGCATGTTGAGCCCTGTCTCTGGAGAGCTGACTTCTACCTGTTCCAAAG	(((((((((((((....(((((.(.((.((........)).)).))))))..))).))))))))))..	chr11 + 46899580 46899648	intron	100	0	-24	no	mir-6505	Primates	a, b		mir-6505	intron	100	A	0	mir-6505	Primates	Ref1	TTGGAATAGGGGATATCTCAGCATGTTGAGCCCTGTCTCTGGAGAGCTGACTTCTACCTGTTCCAAAG	chr11 + 46899580 46899648	intron
mir-3654	TTCATGAGCTGCAATCTCATCACTGGAATGTTCCAGCGACTGGACAAGCTGAGGAA	.((.(.((((....(((..((.(((((....))))).))..)))..)))).).)).	chr11 + 47208898 47208954	5UTR	100	0	-16	no		Primates	b, c		mir-3654	5utr	100	A	0		Primates	anotation	TTCATGAGCTGCAATCTCATCACTGGAATGTTCCAGCGACTGGACAAGCTGAGGAA	chr11 + 47208898 47208954	5UTR
mir-1291	AACCTTGGGTAGAATTCCAGTGGCCCTGACTGAAAACCAGCAGTTGTACTGTAGCTGTTGGTTTCAAGCAGAGGCCTAAAGGACTGTCTTCCTATGGTCTGTTGGCTGTTCT	.(((.((((.(((..(((...(((((((.((..(((((((((((((.....)))))))))))))..))))).))))....)))...))).)))).)))..............	chr11 - 47466960 47467072	intron	96.43	1	-43.5	no	mir-1291	Mammals	b		mir-1291	intron	96.43	B	0	mir-1291	Mammalia		AACCTTGGGTAGAATTCCAGTGGCCCTGACTGAAAACCAGCAGTTGTACTGTAGCTGTTGGTTTCAAGCAGAGGCCTAAAGGACTGTCTTCCTATGGTCTGTTGGCTGTTCT	chr11 - 47466960 47467072	intron
mir-4701	CCTTGGCCACTACACCCACCCCTTGTGAATGTCAGGCAATGGGTGATGGGTGTGGTGTCCACA	...(((.(((((((((((((((((((.........)))).))).).))))))))))).)))..	chr11 - 47589890 47589953	intron	95.24	0	-30.7	no		Primates	b, c		mir-4701	intron	95.24	A	0		Primates	anotation	CCTTGGCCACTACACCCACCCCTTGTGAATGTCAGGCAATGGGTGATGGGTGTGGTGTCCACA	chr11 - 47589890 47589953	intron
mir-1293	AGGTTGTTCTGGGTGGTCTGGAGATTTGTGCAGCTTGGACCTGCACAAATCTCTGGACCACTTAGCCTTTA	(((.....(((((((((((((((((((((((((.......))))))))))))))))))))))))))))...	chr11 - 49095704 49095775	intron	95.77	0	-41.3	no	mir-1293	Primates	b		mir-1293	intron	95.77	A	0	mir-1293	Primates		AGGTTGTTCTGGGTGGTCTGGAGATTTGTGCAGCTTGGACCTGCACAAATCTCTGGACCACTTAGCCTTTA	chr11 - 49095704 49095775	intron
mir-6757	GGGCTCAGGGATGGGAGGCCAGGATGAAGACTAGTCCCTAATCCTCAACACTGGCCTTGCTGTCCCCAG	.......((((((((((((((((.(((.((.(((...))).)).))).).)))))))).)))))))...	chr11 + 51894608 51894677	intron	92.75	0	-28.6	no		Primates	b, c		mir-6757	intron	92.75	A	0		Primates	anotation	GGGCTCAGGGATGGGAGGCCAGGATGAAGACTAGTCCCTAATCCTCAACACTGGCCTTGCTGTCCCCAG	chr11 + 51894608 51894677	intron
mir-196a-2	TGCTCGCTCAGCTGATCTGTGGCTTAGGTAGTTTCATGTTGTTGGGATTGAGTTTTGAACTCGGCAACAAGAAACTGCCTGAGTTACATCAGTCGGTTTTCGTCGAGGGC	..(((((..(((((((.((((((((((((((((((.((((((((((.((........)))))))))))).))))))))))))))))))...)))))))...).))))...	chr11 + 52893302 52893412	space	100	0	-50.8	yes	mir-196	Vertebrates	a, b		mir-196a-2	space	100	A	5	mir-196	Vertebrata	Ref1	TGCTCGCTCAGCTGATCTGTGGCTTAGGTAGTTTCATGTTGTTGGGATTGAGTTTTGAACTCGGCAACAAGAAACTGCCTGAGTTACATCAGTCGGTTTTCGTCGAGGGC	chr11 + 52893302 52893412	space
mir-615	CTCGGGAGGGGCGGAAGGGGGGTCCCCGGTGCTCGGATCTCGAGGGTGCTTATTGTTCGGTCCGAGCCTGGGTCTCCCTCTTCCCCCCAACCCCCC	...(((.((((.((((((((((..(((((.((((((((..((((.(.......).)))))))))))))))))..))))))))))))))...)))..	chr11 + 52935512 52935608	intron	100	0	-57.8	no	mir-615	Mammals	a, b		mir-615	intron	100	A	0	mir-615	Mammalia	Ref1	CTCGGGAGGGGCGGAAGGGGGGTCCCCGGTGCTCGGATCTCGAGGGTGCTTATTGTTCGGTCCGAGCCTGGGTCTCCCTCTTCCCCCCAACCCCCC	chr11 + 52935512 52935608	intron
mir-3198-2	GACTCTGTTCTCACTGTTCACCCAGCACTAGCAGTACCAGACGGTTCTGTGGAGTCCTGGGGAATGGAGAGAGCACAGTC	((((.(((((((.((((((.(((((.(((.((((.(((....))).))))..))).))))))))))).))))))).))))	chr11 - 53139935 53140015	intron	97.5	0	-40.2	yes	mir-3198	Primates	a, b		mir-3198-2	intron	97.5	A	4	mir-3198	Primates	Ref2	GACTCTGTTCTCACTGTTCACCCAGCACTAGCAGTACCAGACGGTTCTGTGGAGTCCTGGGGAATGGAGAGAGCACAGTC	chr11 - 53139935 53140015	intron
mir-148b	CAAGCACGATTAGCATTTGAGGTGAAGTTCTGTTATACACTCAGGCTGTGGCTCTCTGAAAGTCAGTGCATCACAGAACTTTGTCTCGAAAGCTTTCTA	.......((..(((.((((((((((((((((((.((.((((..((((.............)))))))).)).)))))))))))))))))).))).))..	chr11 + 53257121 53257220	space	100	0	-31.2	yes	mir-148	Vertebrates	a, b		mir-148b	space	100	A	1	mir-148	Vertebrata	Ref1	CAAGCACGATTAGCATTTGAGGTGAAGTTCTGTTATACACTCAGGCTGTGGCTCTCTGAAAGTCAGTGCATCACAGAACTTTGTCTCGAAAGCTTTCTA	chr11 + 53257121 53257220	space
mir-1228	TGATGAGCGCGACTGCCCAGGTGGGCAGGGGCAGGTGTGTGGTGGGCGGTGGCCTGCGGTGAGCACGGCCTTCACACCTGCCTCGCCCCCCAGGTGTGAAACGCCCCAGAT	......(((..((.(((..((.((((.((((((((((((....((((.(((..(......)..))).)))).))))))))))))))))))..)))))....))).......	chr11 + 56153519 56153630	intron	95.5	1	-53.4	no	mir-1228	Primates	b, c		mir-1228	intron	95.5	B	0	mir-1228	Primates	anotation	TGATGAGCGCGACTGCCCAGGTGGGCAGGGGCAGGTGTGTGGTGGGCGGTGGCCTGCGGTGAGCACGGCCTTCACACCTGCCTCGCCCCCCAGGTGTGAAACGCCCCAGAT	chr11 + 56153519 56153630	intron
mir-616	TTAGGTAATTCCTCCTCTCAAAACCCTCCAATGACTTCCCTGACATGACATAGGAAGTCACTGGAGAGTTTTGAGCAGAGGAATGACCTGTTTTAAAA	.(((((.(((((((..((((((((.(((((.((((((((.((......))..)))))))).))))).))))))))..))))))).)))))........	chr11 - 56500658 56500756	intron	100	0	-47.3	yes	mir-616	Primates	a		mir-616	intron	100	A	1	mir-616	Primates	Ref1	TTAGGTAATTCCTCCTCTCAAAACCCTCCAATGACTTCCCTGACATGACATAGGAAGTCACTGGAGAGTTTTGAGCAGAGGAATGACCTGTTTTAAAA	chr11 - 56500658 56500756	intron
mir-26a-2	GGCTGTGGCTGGATTCAAGTAATCCAGGATAGGCTGTTTCCATCTGTGAGGCCTATTCTTGATTACTTGTTTCTGGAGGCAGCT	((((((..(((((..(((((((((.((((((((((..............)))))))))).)))))))))..)))))..))))))	chr11 - 56821914 56821998	intron	100	0	-41.3	yes	mir-26	Vertebrates	a, b		mir-26a-2	intron	100	A	1	mir-26	Vertebrata	Ref1	GGCTGTGGCTGGATTCAAGTAATCCAGGATAGGCTGTTTCCATCTGTGAGGCCTATTCTTGATTACTTGTTTCTGGAGGCAGCT	chr11 - 56821914 56821998	intron
mir-9947	TAGGAGGGAGAGTCACGGCAGGCTGACTCTCATTGAGCTCGGGAGTTATGTGGGTAAAGGAGCTTTGGGAGTCAGGCGCCGTGGCTTACACCTGTCA	..(.((((.((((((((((.(.((((((((((..((((((.....((((....))))..)))))))))))))))).))))))))))).).))).)..	chr11 - 56822420 56822517	intron	94.79	2	-48.7	no		Primates	b		mir-9947	intron	94.79	C	0		Primates		TAGGAGGGAGAGTCACGGCAGGCTGACTCTCATTGAGCTCGGGAGTTATGTGGGTAAAGGAGCTTTGGGAGTCAGGCGCCGTGGCTTACACCTGTCA	chr11 - 56822420 56822517	intron
mir-7975	GAGCAAAGAGCAGGAGGACAGGGGATTGATCTCCCAAGGGAGGTCCCCTGATCCGAGTCAGGGCACCA	..((...((...(((...((((((((....((((....)))))))))))).)))...))...))....	chr11 - 57931924 57931992	space	94.12	2	-26.4	no		Primates	b		mir-7975	space	94.12	C	0		Primates		GAGCAAAGAGCAGGAGGACAGGGGATTGATCTCCCAAGGGAGGTCCCCTGATCCGAGTCAGGGCACCA	chr11 - 57931924 57931992	space
mir-6125	GCTCTGGGGCGTGCCGCCGCCGTCGCTGCCACCTCCCCTACCGCTAGTGGAAGAAGATGGCGGAAGGCGGAGCGGCGGATCTGGACACCCAGCGGT	((((((((..((.(((...(((((((.......((((((.((((((...........)))))).))).))))))))))...))))).))))).)))	chr11 + 61430231 61430327	5UTR	100	0	-41.7	no		Primates	b, c		mir-6125	5UTR	100	A	0		Primates	anotation	GCTCTGGGGCGTGCCGCCGCCGTCGCTGCCACCTCCCCTACCGCTAGTGGAAGAAGATGGCGGAAGGCGGAGCGGCGGATCTGGACACCCAGCGGT	chr11 + 61430231 61430327	5UTR
let-7i	TGGCTGAGGTAGTAGTTTGTGCTGTTGGTCGGGTTGTGACATTGCCCGCTGTGGAGATAACTGCGCAAGCTACTGCCTTGCTAGTGCTGG	((((.(((((((((((((((((.(((((.(((((.........)))))))........))).))))))))))))))))))))).......	chr11 + 61772397 61772487	space	100	0	-40.4	yes	let-7	Vertebrates	a, b		let-7i	space	100	A	1	let-7	Vertebrata	Ref1	TGGCTGAGGTAGTAGTTTGTGCTGTTGGTCGGGTTGTGACATTGCCCGCTGTGGAGATAACTGCGCAAGCTACTGCCTTGCTAGTGCTGG	chr11 + 61772397 61772487	space
mir-8104	CCAGAGTTCCTGGGGCTGTCTCAGGACGAGGTGGAGTGCAGCGCCGATCACATCGCCCGCCCCATCCTCATCCTCAAGGAGACTCGGAGGCTGCCCTGGGC	........((((((((.(((((((((.(((((((.(((..(((..........))).))).))).)))).))))............))))).)))))))).	chr11 - 62104155 62104256	CDS	93.07	1	-39.5	no		Mammals	b, c		mir-8104	CDS	93.07	B	0		Mammalia	anotation	CCAGAGTTCCTGGGGCTGTCTCAGGACGAGGTGGAGTGCAGCGCCGATCACATCGCCCGCCCCATCCTCATCCTCAAGGAGACTCGGAGGCTGCCCTGGGC	chr11 - 62104155 62104256	cds
mir-10527	AAAGCAGATGTTGGGTGAACGGCTGTTTCCTCTTATTCAAGCCATGCACCCTACTCTCGCTGGTA	..((((((.((.(((((...((((...............))))...))))).))))).)))....	chr11 + 62846570 62846635	intron	95.38	1	-21.3	no		Primates	b		mir-10527	intron	95.38	B	0		Primates		AAAGCAGATGTTGGGTGAACGGCTGTTTCCTCTTATTCAAGCCATGCACCCTACTCTCGCTGGTA	chr11 + 62846570 62846635	intron
mir-548c-2	CATTGGCATCTATTAGGTTGGTACAAAACTAATTGCAGTTTTTGCCATTACTTTCAGTAGCAAAAATCTCAATTACTTTTGTACCAACTTAATACTT	..........((((((((((((((((((.((((((..((((((((...((((...))))))))))))..)))))).))))))))))))))))))...	chr11 + 63655899 63655996	intron	95.88	0	-35.5	no	mir-548	Primates	b, c		mir-548c-2	intron	95.88	A	0	mir-548	Primates	anotation	CATTGGCATCTATTAGGTTGGTACAAAACTAATTGCAGTTTTTGCCATTACTTTCAGTAGCAAAAATCTCAATTACTTTTGTACCAACTTAATACTT	chr11 + 63655899 63655996	intron
mir-548z	AAGTATTAAGTTGGTACAAAAGTAATTGAGATTTTTGCTACTGAAAGTAATGGCAAAAACTGCAATTAGTTTTGTACCAACCTAATAGATGCCAATG	...(((((.((((((((((((.((((((((.(((((((((.((....)).))))))))))).)))))).)))))))))))).)))))..........	chr11 - 63655899 63655996	space	95.88	3	-34.8	no	mir-548	Primates	a, b		mir-548z	space	95.88	C	0	mir-548	Primates	Ref2	AAGTATTAAGTTGGTACAAAAGTAATTGAGATTTTTGCTACTGAAAGTAATGGCAAAAACTGCAATTAGTTTTGTACCAACCTAATAGATGCCAATG	chr11 - 63655899 63655996	space
mir-7975	GAGCAGAGAGCAGGAGGACAGGGGATTGATCTCCCAAGGGAGGTCCCCTGATCCGAGTCACGGCACCA	..((...((...(((...((((((((....((((....)))))))))))).)))...))...))....	chr11 + 63838609 63838677	intron	94.12	1	-26.4	no		Primates	b		mir-7975	intron	94.12	B	0		Primates		GAGCAGAGAGCAGGAGGACAGGGGATTGATCTCCCAAGGGAGGTCCCCTGATCCGAGTCACGGCACCA	chr11 + 63838609 63838677	intron
mir-763	TTTTCTATAATGGTGCTTTAGCAATAATGATGGAGGTGCAGGCATTTCCTGAGGATTAATGACCAGCTGGGAGGAACCAGTGGCCCTTGGCTCTGCCTCCCAGCCAGCCATTAATTCTAAGGAAATGTCTTTTGCTGAGGTCGTTATTGCTATTATAAGCTTAAAATGGAAAA	.(((((((..(((.(((((((((((((((((...((((.(((((((((((.((((((((((.(..(((((((((...(((.((((...))))))))))))))))..).)))))))))).)))))))))))..))))...)))))))))))))....)))))))..))))))).	chr11 + 64932376 64932549	intron	100	0	-78.4	no	mir-763	Mammals	b		mir-763	intron	100	A	0	mir-763	Mammalia		TTTTCTATAATGGTGCTTTAGCAATAATGATGGAGGTGCAGGCATTTCCTGAGGATTAATGACCAGCTGGGAGGAACCAGTGGCCCTTGGCTCTGCCTCCCAGCCAGCCATTAATTCTAAGGAAATGTCTTTTGCTGAGGTCGTTATTGCTATTATAAGCTTAAAATGGAAAA	chr11 + 64932376 64932549	intron
mir-6502	CAGAGTGGGAGCTCTAGAAAGATTGTTGACCAATGATCTTATTGACTAGATCATCTTTCTAGAGTATGACTATTTT	.(((((((..(((((((((((((.(((...(((((....)))))....))).)))))))))))))....)))))))	chr11 + 65312538 65312614	space	96.05	0	-24.6	no		Primates	b		mir-6502	space	96.05	A	0		Primates		CAGAGTGGGAGCTCTAGAAAGATTGTTGACCAATGATCTTATTGACTAGATCATCTTTCTAGAGTATGACTATTTT	chr11 + 65312538 65312614	space
mir-3913-1	TTGTTTATAATAAACTGAAATATTTGGGACTGATCTTGACACTCTTACATAAAATGTTTTGGCAGACATCAAGATCAGTCCCAAATATTTCAGTTTATTATAGACAG	.((((((((((((((((((((((((((((((((((((((...(((..((..........))..)))..)))))))))))))))))))))))))))))))))))))).	chr11 - 68640732 68640839	space	94.12	0	-58.9	yes	mir-3913	Primates	b, c		mir-3913-1	space	94.12	A	2	mir-3913	Primates	anotation	TTGTTTATAATAAACTGAAATATTTGGGACTGATCTTGACACTCTTACATAAAATGTTTTGGCAGACATCAAGATCAGTCCCAAATATTTCAGTTTATTATAGACAG	chr11 - 68640732 68640839	space
mir-3913-2	TGTCTATAATAAACTGAAATATTTGGGACTGATCTTGATGTCTGCCAAAACATTTTATGTAAGAGTGTCAAGATCAGTCCCAAATATTTCAGTTTATTATAAACA	(((.(((((((((((((((((((((((((((((((((((.(((..((..........))..)))..))))))))))))))))))))))))))))))))))).)))	chr11 + 68640733 68640838	space	94	0	-55.3	no	mir-3913	Primates	b, c		mir-3913-2	space	94	A	0	mir-3913	Primates	anotation	TGTCTATAATAAACTGAAATATTTGGGACTGATCTTGATGTCTGCCAAAACATTTTATGTAAGAGTGTCAAGATCAGTCCCAAATATTTCAGTTTATTATAAACA	chr11 + 68640733 68640838	space
mir-1252	AAAAAATGTGAGGTGTAGAAAGAAGGAAGCTGAATTCATTTAGAAAAGAGAATGCCAAATGAGCTTAATTTCCTTTTTTCTAAATCTTAATAATCTGCCTTGCTTTTCT	.......((((((((((((((((((((((.(((.(((((((.(...........).))))))).))).)))))))))))))).............))))))))......	chr11 + 78657625 78657734	intron	97.25	1	-25.8	no	mir-1252	Primates	b		mir-1252	intron	97.25	B	0	mir-1252	Primates		AAAAAATGTGAGGTGTAGAAAGAAGGAAGCTGAATTCATTTAGAAAAGAGAATGCCAAATGAGCTTAATTTCCTTTTTTCTAAATCTTAATAATCTGCCTTGCTTTTCT	chr11 + 78657625 78657734	intron
mir-618	TCTTGTTCACAACCAAACTCTACTTGTCCTTCTGAGTGTGATTACGCCCATGGAGTAGCTCAGGAGGCAAACAGGGTTACCCTGTGGATAGGTCTGAAAA	.((((((((((....((((((..(((.((((((((((.....(((.((...)).))))))))))))))))..))))))....))))))))))........	chr11 - 80107195 80107295	intron	100	0	-36	no	mir-618	Primates	a		mir-618	intron	100	A	0	mir-618	Primates	Ref1	TCTTGTTCACAACCAAACTCTACTTGTCCTTCTGAGTGTGATTACGCCCATGGAGTAGCTCAGGAGGCAAACAGGGTTACCCTGTGGATAGGTCTGAAAA	chr11 - 80107195 80107295	intron
mir-6826	CTTGGTCAACAGGAAAGAGGTGGGACCTCCTGGCTCTTCCTCTGCAGCATGGCTCAGACCTAGAGCAATGTTTAAGCTCCCCTCTCTTCCCTGTTCAG	.......((((((.((((((.((((.((....(((((...((((.(((...)))))))...)))))........)).)))).)))))).))))))...	chr11 - 87902926 87903024	intron	94.9	1	-34.7	no		Primates	b, c		mir-6826	intron	94.9	B	0		Primates	anotation	CTTGGTCAACAGGAAAGAGGTGGGACCTCCTGGCTCTTCCTCTGCAGCATGGCTCAGACCTAGAGCAATGTTTAAGCTCCCCTCTCTTCCCTGTTCAG	chr11 - 87902926 87903024	intron
mir-7976	TCCCCTGAGACTTTTGCTCTAATAATTTATTCTAATAATAATTTACAGCAAAAGTCTCAGGGCAGA	..((((((((((((((((.(((....((((....))))....))).))))))))))))))))....	chr11 + 89626348 89626414	intron	93.94	1	-28.7	no		Primates	b		mir-7976	intron	93.94	B	0		Primates		TCCCCTGAGACTTTTGCTCTAATAATTTATTCTAATAATAATTTACAGCAAAAGTCTCAGGGCAGA	chr11 + 89626348 89626414	intron
mir-3059	AGGTGGTACACCCTTTCCTCTCTGCCCCATAGGGTGTAGCTCTAACTACCCTCTAGGGAAGAGAAGGTTGGGTGAACAGCCT	((((.((.(((((...(((((((..(((.(((((.((((......)))).)))))))).)))).)))..))))).)).))))	chr11 - 90247087 90247169	space	100	0	-37.4	no	mir-3059	Mammals	a, b		mir-3059	space	100	A	0	mir-3059	Mammalia	Ref1	AGGTGGTACACCCTTTCCTCTCTGCCCCATAGGGTGTAGCTCTAACTACCCTCTAGGGAAGAGAAGGTTGGGTGAACAGCCT	chr11 - 90247087 90247169	space
mir-5700	TTAATTAATGCATTAAATTACTGAAGGCCCTTGGGCACCCCAGGCCTTCAATAATTTAATGCATTTATTGA	(((((.((((((((((((((.((((((((..((((...)))))))))))).)))))))))))))).)))))	chr11 + 98262773 98262844	space	98.59	1	-35.7	no		Primates	b, c		mir-5700	space	98.59	B	0		Primates	anotation	TTAATTAATGCATTAAATTACTGAAGGCCCTTGGGCACCCCAGGCCTTCAATAATTTAATGCATTTATTGA	chr11 + 98262773 98262844	space
mir-7844	TGATTGTGTGGACTCGTGTGCAAGAAAAACTAGGGCTGTGTGGTGTAAATAACTACAATTCTCTTAACTCGGTAGCAGTTGCCAACTCAGTCCTTGTACTTTGTTAACACGAATCTATTTCA	.......(((((.((((((....(((..((.(((((((.(((((...(((..((((...............))))..)))))).)).))))))).))..)))....)))))).)))))....	chr11 - 98272202 98272324	3UTR	95.08	1	-31.9	no		Primates	b, c		mir-7844	3UTR	95.08	B	0		Primates	anotation	TGATTGTGTGGACTCGTGTGCAAGAAAAACTAGGGCTGTGTGGTGTAAATAACTACAATTCTCTTAACTCGGTAGCAGTTGCCAACTCAGTCCTTGTACTTTGTTAACACGAATCTATTTCA	chr11 - 98272202 98272324	3UTR
mir-331	CACTCCCAAGGAGTTTGGTTTTGTTTGGGTTTGTTCTAGGTATGGTCCCAGGGATCCCAGATCAAACCAGGCCCCTGGGCCTATCCTAGAACCAACCTAAACTCGCGCATC	.(((((...))))).((.....(((((((((.((((((((.((((.(((((((...((...........)).))))))).)))))))))))).))))))))).....))..	chr11 + 99016663 99016774	space	100	0	-48.4	yes	mir-331	Mammals	a, b		mir-331	space	100	A	1	mir-331	Mammalia	Ref1	CACTCCCAAGGAGTTTGGTTTTGTTTGGGTTTGTTCTAGGTATGGTCCCAGGGATCCCAGATCAAACCAGGCCCCTGGGCCTATCCTAGAACCAACCTAAACTCGCGCATC	chr11 + 99016663 99016774	space
mir-1251	TCCATGGGTCAGCTATGTGGACTCTAGCTGCCAAAGGCGCTTCTCCTTCTGAACAGAGCGCTTTGCTCAGCCAGTGTAGACATGGCCTGATAAACAATGGA	(((((..(((((((((((..((.((.((((...(((((((((.((.....))...)))))))))...)))).)).))..)))))).))))).....)))))	chr11 + 101220788 101220889	intron	100	0	-38.5	no	mir-1251	Mammals	a, b		mir-1251	intron	100	A	0	mir-1251	Mammalia	Ref1	TCCATGGGTCAGCTATGTGGACTCTAGCTGCCAAAGGCGCTTCTCCTTCTGAACAGAGCGCTTTGCTCAGCCAGTGTAGACATGGCCTGATAAACAATGGA	chr11 + 101220788 101220889	intron
mir-135a-2	AGATAAATTCACTCTAGTGCTTTATGGCTTTTTATTCCTATGTGATAGTAATAAAGTCTCATGTAGGGATGGAAGCCATGAAATACATTGTGAAAAATCA	.(((...(((((....(((.((((((((((((.((((((((((((.(.(.....).).)))))))))))))))))))))))).)))...)))))..))).	chr11 + 101292131 101292231	intron	100	0	-34.1	yes	mir-135	Vertebrates	a, b		mir-135a-2	intron	100	A	5	mir-135	Vertebrata	Ref1 Ref2	AGATAAATTCACTCTAGTGCTTTATGGCTTTTTATTCCTATGTGATAGTAATAAAGTCTCATGTAGGGATGGAAGCCATGAAATACATTGTGAAAAATCA	chr11 + 101292131 101292231	intron
mir-4495	AAGAAATGAAAACAGGCTTTTTGCTCAGTTGAGTGATTTTGAGCAAAAAGCTTATTTACATTTCTG	.(((((((.(((.(((((((((((((((..........))))))))))))))).))).))))))).	chr11 - 101634824 101634890	space	95.45	1	-27.8	no		Primates	b		mir-4495	space	95.45	B	0		Primates		AAGAAATGAAAACAGGCTTTTTGCTCAGTTGAGTGATTTTGAGCAAAAAGCTTATTTACATTTCTG	chr11 - 101634824 101634890	space
mir-3652	CGGCTGGAGGTGTGAGGATCCGAGCTTAGGGGTGGGGGTGGAGGCGGCTCCTGCGATCGAGAGGGACTTGAGACTCACCGGCCGCACGCCATGAGGGCCCTGTGGGTGCTGGGCCTCTGCTGCGTCCTGCT	.(((.(((.((((((((.((((.((((((((((....((((.(((((((..((.(.(((((.....)))))..).))..)))))).).))))....))))).)))))..)))))))).)).)).))).)))	chr11 + 107611848 107611979	5UTR	95.42	0	-55.9	no		Primates	b		mir-3652	5UTR	95.42	A	0		Primates		CGGCTGGAGGTGTGAGGATCCGAGCTTAGGGGTGGGGGTGGAGGCGGCTCCTGCGATCGAGAGGGACTTGAGACTCACCGGCCGCACGCCATGAGGGCCCTGTGGGTGCTGGGCCTCTGCTGCGTCCTGC	chr11 + 107611848 107611979	5UTR
mir-619	TCAAGTGATCCGCCCACCTCAGCCTCCCAAAATGCTGGGATTACAGGCATGAGCCACCGCAGTTGACCATGACCTGGACATGTTTGTGCCTGGGATTGTCAGTTTGCAGAGTGTCCCTC	....(((((((........((((..........)))))))))))((((((((((.....(((((......)).))).....))))))))))(((((..((........))..)))))..	chr11 - 112485528 112485647	intron	97.98	1	-31.7	yes	mir-619	Primates	a		mir-619	intron	97.98	B	1	mir-619	Primates	Ref1	CGCCCACCTCAGCCTCCCAAAATGCTGGGATTACAGGCATGAGCCACCGCAGTTGACCATGACCTGGACATGTTTGTGCCTGGGATTGTCAGTTTGCAG	chr11 - 112485538 112485637	intron
mir-7705	AATAGCTCAAAATGTCAGTTCTGTTTTAAATAACAGAATTGATAACTGAGAAAGGAA	.....((((...(((((((((((((......)))))))))))))..)))).......	chr11 - 112931512 112931569	space	94.74	1	-18.9	no		Primates	b		mir-7705	space	94.74	B	0		Primates		AATAGCTCAAAATGTCAGTTCTGTTTTAAATAACAGAATTGATAACTGAGAAAGGAA	chr11 - 112931512 112931569	space
mir-10527	AAAGCAAATGTTGGGTGAACGGCTGTTTCCTCTTATTCAAGCCATGCACCCTACTCTTGCTGGTA	..(((((..((.(((((...((((...............))))...))))).))..)))))....	chr11 - 112932085 112932150	intron	98.46	0	-22.2	no		Primates	b, c		mir-10527	intron	98.46	A	0		Primates	anotation	AAAGCAAATGTTGGGTGAACGGCTGTTTCCTCTTATTCAAGCCATGCACCCTACTCTTGCTGGTA	chr11 - 112932085 112932150	intron
mir-6760	CAGTGCAGGGAAAGGTGGAAGTGCAGAGTGGGCTCTGCGGTGGCCATGCTCACCTCTCGCCCATGCTGTCCCCTTCTCCCCAGC	....((.((((((((.((....((((.((((((...(.((((((...)).)))).)..)))))).)))))))))).))))..))	chr11 + 114936903 114936987	intron	95.59	1	-34.2	no		Primates	b		mir-6760	intron	95.59	B	0		Primates		CAGTGCAGGGAAAGGTGGAAGTGCAGAGTGGGCTCTGCGGTGGCCATGCTCACCTCTCGCCCATGCTGTCCCCTTCTCCCCAG	chr11 + 114936903 114936987	intron
mir-3657	TGTGTCCCATTATTAAATAATGAAATCTGAAATCACCAATAATGGGACACTAATGTGATTCATGTTGTTGTGTCCTGTTATTGGTGATTTCAGATTTCATTATATGATTAAGGACATA	(((((((....((((.(((((((((((((((((((((((((((((((((((((((((...)))))))..)))))))))))))))))))))))))))))))))).))))...)))))))	chr11 - 115718346 115718464	intron	96.58	2	-63.8	no		Primates	b		mir-3657	intron	96.58	C	0		Primates		TGTGTCCCATTATTAAATAATGAAATCTGAAATCACCAATAATGGGACACTAATGTGATTCATGTTGTTGTGTCCTGTTATTGGTGATTTCAGATTTCATTATATGATTAAGGACATA	chr11 - 115718346 115718464	intron
mir-6861	GAGGCACTGGGTAGGTGGGGTTCCAGGGCTCCTGACACCTGGGCCTCTCCTCCCCAGGCCCACA	(.(((.(((((.(((.(((((.(((((..........)))))))))).))).)))))))))...	chr11 - 115855444 115855508	intron	96.88	1	-36.4	no		Primates	b, c		mir-6861	intron	96.88	B	0		Primates	anotation	GAGGCACTGGGTAGGTGGGGTTCCAGGGCTCCTGACACCTGGGCCTCTCCTCCCCAGGCCCACA	chr11 - 115855444 115855508	intron
mir-1302-1	CAGAAAGCCCAGTTAAATTTGAATTTCAAGTAAACAATGAATAATTGTGTATGTAAGTATATCCCATACAGTATTTAGGACATACTTATGCTAAAAATTATTCATTGCTTATCTGAAATTCAAATGCAACTAGGATTCCTATA	.......((.((((..((((((((((((.((((.((((((((((((......((((((((.(((.............))).))))))))......)))))))))))).)))).))))))))))))..)))).)).........	chr11 - 116402867 116403010	space	95.8	1	-43.1	no	mir-1302	Mammals	b, c		mir-1302-1	space	95.8	B	0	mir-1302	Mammalia	anotation	CAGAAAGCCCAGTTAAATTTGAATTTCAAGTAAACAATGAATAATTGTGTATGTAAGTATATCCCATACAGTATTTAGGACATACTTATGCTAAAAATTATTCATTGCTTATCTGAAATTCAAATGCAACTAGGATTCCTATA	chr11 - 116402867 116403010	space
mir-7106	GCTTCTGGGAGGAGGGGATCTTGGGAGTGATTCCGACAGCTGAGCTCCCTGAATCCCTGTCCCAG	....((((((..(((((.((..((((((...............)))))).)).))))).))))))	chr11 - 116878887 116878952	intron	96.92	0	-27.5	no		Primates	b, c		mir-7106	intron	96.92	A	0		Primates	anotation	GCTTCTGGGAGGAGGGGATCTTGGGAGTGATTCCGACAGCTGAGCTCCCTGAATCCCTGTCCCAG	chr11 - 116878887 116878952	intron
mir-6762	AGAGCCAGGGCCATGGAGCAGCCTGTGTAGACGGGGACCTGCCCTGCATGGGCACCCCCTCACTGGCTGCTTCTCTTGGTCTCCAG	.(((((((((....(((((((((.(((.((..((((...(((((.....)))))))))))))).))))))))))))))).)))...	chr11 + 117014765 117014851	intron	97.67	1	-46.3	no		Primates	b, c		mir-6762	intron	97.67	B	0		Primates	anotation	AGAGCCAGGGCCATGGAGCAGCCTGTGTAGACGGGGACCTGCCCTGCATGGGCACCCCCTCACTGGCTGCTTCTCTTGGTCTCCAG	chr11 + 117014765 117014851	intron
mir-1178	GGGTTGGCTGGCAGAGGAAGGGAAGGGTCCGGGGTCAGCTGAGCATGCCCTCACGTTGCTCACTGTTCTTCCCTAGAATGTCAGGTGATG	..((((.((((((.....(((((((((....(((.((((((((......)))).)))))))....)))))))))....)))))).)))).	chr11 - 123571237 123571327	intron	97.78	0	-33.5	no	mir-1178	Primates	b, c		mir-1178	intron	97.78	A	0	mir-1178	Primates	anotation	GGGTTGGCTGGCAGAGGAAGGGAAGGGTCCGGGGTCAGCTGAGCATGCCCTCACGTTGCTCACTGTTCTTCCCTAGAATGTCAGGTGATG	chr11 - 123571237 123571327	intron
mir-7107	TGCCGTGGGCCTGGGGAGGAGGAAGGGCAAGTCCAAAGGTATACAGTTGGTCTGTTCCTTCTCTCTTTTTGGCCTACAAG	....(((((((..((((((((((((((..((.((((..(....)..)))).))..)))))).)))))))))))))))...	chr11 - 125457773 125457853	intron	97.5	1	-34.1	no		Primates	b, c		mir-7107	intron	97.5	B	0		Primates	anotation	TGCCGTGGGCCTGGGGAGGAGGAAGGGCAAGTCCAAAGGTATACAGTTGGTCTGTTCCTTCTCTCTTTTTGGCCTACAAG	chr11 - 125457773 125457853	intron
mir-9902-1	GCAGGGAAAGGGAACCCAGAAATCTGGTATGCCAGCAAAGAGAGTAAGAATTTCTGGCAAGCCAGGCTTCTGGTCTCTCTCTCTCTCTCTTTC	..(((((.(((((..((((((.((((((.((((((.(((...........))))))))).)))))).))))))..))))).))))).......	chr11 - 126920208 126920301	space	95.7	0	-39.2	no		Primates	b		mir-9902-1	space	95.7	A	0		Primates		GCAGGGAAAGGGAACCCAGAAATCTGGTATGCCAGCAAAGAGAGTAAGAATTTCTGGCAAGCCAGGCTTCTGGTCTCTCTCTCTCTCTCTTTC	chr11 - 126920208 126920301	space
mir-8072	GCGTCAAGATGGCGGCGGGGAGGTAGGCAGAGCCGGACGCCGCTGCTGCCGCCGCCACCGCCGCCTCCGCTCCAGTCGCC	(((.(.((..((((((((((.(((.((((((((.((...))))).)))))))).)).))))))))....))...).))).	chr11 - 127670177 127670257	intron	98.75	0	-43.8	no		Primates	b, c		mir-8072	intron	98.75	A	0		Primates	anotation	GCGTCAAGATGGCGGCGGGGAGGTAGGCAGAGCCGGACGCCGCTGCTGCCGCCGCCACCGCCGCCTCCGCTCCAGTCGCC	chr11 - 127670177 127670257	intron
mir-5188	GGGAGGCCTAGAAATTTCTCTGGTTTCAATGGGTACGATTATTGTAATCAGGATCCATTCAATAATCGGACCCATTTAAACCGAAGGTTTTAAAAGACATGAATAGAATCCCA	((((...((((((((((.((.(((((.(((((((.(((((((((.(((........)))))))))))).))))))).))))))))))))))............)))..)))).	chr11 + 129298537 129298650	space	94.69	1	-34	no		Primates	b, c		mir-5188	space	94.69	B	0		Primates	anotation	GGGAGGCCTAGAAATTTCTCTGGTTTCAATGGGTACGATTATTGTAATCAGGATCCATTCAATAATCGGACCCATTTAAACCGAAGGTTTTAAAAGACATGAATAGAATCCCA	chr11 + 129298537 129298650	space
mir-762-2	GCCCGGCTCCGGGTCTTGGCCCGTACGGTCCGGCCGGCCATGCTGGCGGGGCTGGGGCTGGAGCCGAGCCC	....(((((.((.(((.(((((...((((((.((((((...)))))).)))))))))))))).))))))).	chr11_KE145733_random - 4561 4632	space	97.18	1	-45.3	no	mir-762	Vertebrates	a, b		mir-762-2	space	97.18	B	0	mir-762	Vertebrata	Ref1	GCCCGGCTCCGGGTCTTGGCCCGTACGGTCCGGCCGGCCATGCTGGCGGGGCTGGGGCTGGAGCCGAGCCC	chr11_KE145733_random - 4561 4632	space
mir-4477a	GCCTCCTCCCATCAATCACAAATGTCCTTAACGGCATTTAAGGATTGCTTTTAAGGACATTTGTGATTCACGGGAGGAGGT	((((((((((...((((((((((((((((((.((((.........)))).))))))))))))))))))...))))))))))	chr12 + 403792 403873	space	96.3	1	-50.9	no	mir-4477	Primates	a, b		mir-4477a	space	96.3	B	0	mir-4477	Primates	Ref2	GCCTCCTCCCATCAATCACAAATGTCCTTAACGGCATTTAAGGATTGCTTTTAAGGACATTTGTGATTCACGGGAGGAGGT	chr12 + 403792 403873	space
mir-4477b	ACCTCCTCCCGTGAATCACAAATGTCCTTAAAAGCAATCCTTAAATGCCGTTAAGGACATTTGTGATTGATGGGAGGAGGC	.(((((((((((.((((((((((((((((((..(((.........)))..)))))))))))))))))).))))))))))).	chr12 - 403792 403873	space	96.3	0	-53.7	no	mir-4477	Primates	b		mir-4477b	space	96.3	A	0	mir-4477	Primates		ACCTCCTCCCGTGAATCACAAATGTCCTTAAAAGCAATCCTTAAATGCCGTTAAGGACATTTGTGATTGATGGGAGGAGGC	chr12 - 403792 403873	space
mir-4784	TGACTGGGCTGAGCAGATGCTGGGGCTGAGAGTGTCATGGTGGAGCCTCTGTCCCTGCTCATCCTCCCCGCATGTTG	.....(((.(((((((..((.((((((................)))))).))..))))))).)))............	chr12 - 1406994 1407071	intron	94.81	2	-25.6	no		Primates	b, c		mir-4784	intron	94.81	C	0		Primates	anotation	TGACTGGGCTGAGCAGATGCTGGGGCTGAGAGTGTCATGGTGGAGCCTCTGTCCCTGCTCATCCTCCCCGCATGTTG	chr12 - 1406994 1407071	intron
mir-7650	GCAAAAAATAAATCCTCTTTTGCAACCCAGAACTCATTGTTCAGTATGAGTTTTGATACATATAAGAAGGGATATTATGAT	.......((((((((.(((((......((((((((((........)))))))))).........))))))))).))))...	chr12 + 21499585 21499666	intron	93.22	2	-18	no		Mammals	b		mir-7650	intron	93.22	C	0		Mammalia	snoRNA	AATCCTCTTTTGCAACCCAGAACTCATTGTTCAGTATGAGTTTTGATACATATAAGAAGGG	chr12 + 21499595 21499656	intron
mir-128-1	TGCAATAATTGGCCTTGTTCCTGAGCTGTTGGATTCGGGGCCGTAGCACTGTCTGAGAGGTTTACATTTCTCACAGTGAACCGGTCTCTTTTTCAGCTGCTTCCTGGCT	..........((((..(.....((((.((((((...(((((((...((((((..(((((((....)))))))))))))...)))))))...)))))).)))))..))))	chr12 + 22055358 22055467	intron	100	0	-39.2	yes	mir-128	Vertebrates	a, b		mir-128-1	intron	100	A	1	mir-128	Vertebrata	Ref1	TGCAATAATTGGCCTTGTTCCTGAGCTGTTGGATTCGGGGCCGTAGCACTGTCTGAGAGGTTTACATTTCTCACAGTGAACCGGTCTCTTTTTCAGCTGCTTCCTGGCT	chr12 + 22055358 22055467	intron
mir-9899	GTCTGCAAACTCTGGCCCGCGGGAGCCGACCGCCCGGCGCAGGTGGGGCACTGGGGCGCCGCGCTCCTGCCCGCAGGGTGAGCGGAACTGGAGAGA	.(((((..((((((....((((((((((..(((((((.((.......)).)).))))).)).))))))))...))))))..)))))..........	chr12 - 38000831 38000927	space	94.79	1	-46	no		Primates	b, c		mir-9899	space	94.79	B	0		Primates	anotation	GTCTGCAAACTCTGGCCCGCGGGAGCCGACCGCCCGGCGCAGGTGGGGCACTGGGGCGCCGCGCTCCTGCCCGCAGGGTGAGCGGAACTGGAGAGA	chr12 - 38000831 38000927	space
mir-4785	GTAGGTGGGGACGCGGCGGCGCTGCTCCTCCGCTGCCGCCGGGAGAGTCGGCGACGCCGCCAGCTCCGCGCGC	((..((((((..((((((.(((((((((((.((....)).))).))).))))).))))))...))))))..))	chr12 - 49137337 49137410	space	100	0	-39.8	no		Primates	b, c		mir-4785	space	100	A	0		Primates	anotation	GTAGGTGGGGACGCGGCGGCGCTGCTCCTCCGCTGCCGCCGGGAGAGTCGGCGACGCCGCCAGCTCCGCGCGC	chr12 - 49137337 49137410	space
mir-548ak	GTGCAAAAGTAACTGCGGTTTTTGCCATTTTAAAAAGTAATGGTAAAACCGCAATTACTTTTGCAC	((((((((((((.(((((((((.((((((.........))))))))))))))).))))))))))))	chr12 + 53693596 53693662	intron	94.74	0	-34.8	no	mir-548	Primates	b		mir-548ak	intron	94.74	A	0	mir-548	Primates		GTGCAAAAGTAACTGCGGTTTTTGCCATTTTAAAAAGTAATGGTAAAACCGCAATTACTTTTGCAC	chr12 + 53693596 53693662	intron
mir-4774	TAGATTAGCCTATATTGTTGTCTGGTATGTAGTAGGTAATAACTAACAAACAGACGATTGCCTAACGTGCCAGAAAGCAACGTAGACAAGGCTTGCGGTTACAAAATAATGC	......(((((((.(((((.((((((((((..((((((((..((.......))...)))))))))))))))))).))))).)).....)))))...................	chr12 + 57461438 57461550	intron	93.75	0	-30	no	mir-4774	Primates	b		mir-4774	intron	93.75	A	0	mir-4774	Primates		TAGATTAGCCTATATTGTTGTCTGGTATGTAGTAGGTAATAACTAACAAACAGACGATTGCCTAACGTGCCAGAAAGCAACGTAGACAAGGCTTGCGGTTACAAAATAAT	chr12 + 57461438 57461550	intron
mir-933	CTTGGGTCAGTTCAGAGGTCCTCGGGGCGCGCGTCGAGTCAGCCGTGTGCGCAGGGAGACCTCTCCCACCCACAGT	..(((((..(...((((((((((.(.(((((((.(......).))))))).).))).))))))))..)))))....	chr12 - 64140710 64140786	intron	100	0	-34.8	yes	mir-933	Primates	a, b		mir-933	intron	100	A	1	mir-933	Primates	Ref1 Ref2	CTTGGGTCAGTTCAGAGGTCCTCGGGGCGCGCGTCGAGTCAGCCGTGTGCGCAGGGAGACCTCTCCCACCCACAGT	chr12 - 64140710 64140786	intron
mir-7164	TAGGAAAAGGAGTGGACAGAGGACATTCCCCTGTCGCTTCTTTTTCTTCT	.(((((((((((((.((((.(((...))).)))))))))))))))))...	chr12 + 65115697 65115747	intron	100	0	-23	no		Cercopithecidae	a, b		mir-7164	intron	100	A	0		Cercopithecidae	Ref1	TAGGAAAAGGAGTGGACAGAGGACATTCCCCTGTCGCTTCTTTTTCTTCT	chr12 + 65115697 65115747	intron
mir-10b	CCAGAGGTTGTAACGTTGTCTATATATACCCTGTAGAACCGAATTTGTGTGGTATCCATATAGTCACAGATTCGATTCTAGGGGAATATATGGTCGATGCAAAAACTTCA	...((((((....(((((.((((((((.((((.(((((.((((((((((.(.(((....))).))))))))))).))))))))).)))))))).)))))....)))))).	chr12 + 65116092 65116202	intron	100	0	-42.9	yes	mir-10	Vertebrates	a, b		mir-10b	intron	100	A	1	mir-10	Vertebrata	Ref1	CCAGAGGTTGTAACGTTGTCTATATATACCCTGTAGAACCGAATTTGTGTGGTATCCATATAGTCACAGATTCGATTCTAGGGGAATATATGGTCGATGCAAAAACTTCA	chr12 + 65116092 65116202	intron
mir-7704	GCAGCGGCGGCGTGGTCGGCGGCGACGTGCTCAGCTTGGCACCCAAGTTCTCCCGCTCCGACGTCCGGCCCGTGGCTCT	.....(((.(((.((((((((.((..(((...(((((((...)))))))....)))..)).)).))))))))).)))..	chr12 + 65154997 65155076	intron	94.92	1	-33.8	no		Primates	b, c		mir-7704	intron	94.92	B	0		Primates	anotation	CGTGGTCGGCGGCGACGTGCTCAGCTTGGCACCCAAGTTCTCCCGCTCCGACGTCCGGC	chr12 + 65155007 65155066	intron
mir-1246	TGCATCCTTGAATGGATTTTTGGAGCAGGAGTGGACACCTGACCCAAAGGAAATCAATCCATAGGCTAGCAAT	(((..(((...((((((((((((..((((........))))..))))).......))))))))))...)))..	chr12 - 65563447 65563520	space	98.63	0	-20.2	yes	mir-1246	Mammals	b		mir-1246	space	98.63	A	1	mir-1246	Mammalia	novel	TGCATCCTTGAATGGATTTTTGGAGCAGGAGTGGACACCTGACCCAAAGGAAATCAATCCATAGGCTAGCAAT	chr12 - 65563447 65563520	space
mir-4444-2	GTGACGACTGGCCCCGCCTCTTCCTCTCGGTCCCATATTGAACTCGAGTTGGAAGAGGCGAGTCCGGTCTCAAA	.(((.((((((.(.((((((((((.((((((.(......).)).))))..)))))))))).).)))))))))..	chr12 + 66165103 66165177	intron	100	0	-37.4	no	mir-4444	Mammals	b		mir-4444-2	intron	100	A	0	mir-4444	Mammalia		GTGACGACTGGCCCCGCCTCTTCCTCTCGGTCCCATATTGAACTCGAGTTGGAAGAGGCGAGTCCGGTCTCAAA	chr12 + 66165103 66165177	intron
mir-3128	TTCCTACTGCAAGTAAAAAACTCTCATTTTCCTTAAAAAATGAGTTTTTTACTTGCAAGAGGAAGTC	(((((..((((((((((((((((..(((((......)))))))))))))))))))))..)))))...	chr12 + 66208312 66208379	space	93.94	1	-27.9	no		Primates	b, c		mir-3128	space	93.94	B	0		Primates	anotation	TTCCTACTGCAAGTAAAAAACTCTCATTTTCCTTAAAAAATGAGTTTTTTACTTGCAAGAGGAA	chr12 + 66208312 66208379	space
mir-6512	TATGCTCTTACCATTAGAAGGGCTGGAAGAAGGCTGAGGGAGAAGCCTTCTTCCAGCTCTTCTAATGGTAAGAGCAT	.((((((((((((((((((((((((((((((((((........))))))))))))))))))))))))))))))))))	chr12 - 66266460 66266537	intron	94.81	1	-63.6	no		Primates	b		mir-6512	intron	94.81	B	0		Primates		TATGCTCTTACCATTAGAAGGGCTGGAAGAAGGCTGAGGGAGAAGCCTTCTTCCAGCTCTTCTAATGGTAAGAGCAT	chr12 - 66266460 66266537	intron
mir-1258	TACCCTGGGGAACTGAGGAGTCTGCTCCTGTGGCTTCCACGACCTAATCCTAACTCCAGGGACTCGCAGGAGTTAGGATTAGGTCGTGGAAGCCAGAGGCGCCTGGGCGC	...(((.((...)).))).((((((.(((.(((((((((((((((((((((((((((.(.(...).).))))))))))))))))))))))))))).))).))..))))..	chr12 + 68833175 68833285	space	99.09	0	-71.4	no	mir-1258	Mammals	a, b		mir-1258	space	99.09	A	0	mir-1258	Mammalia	Ref1	TACCCTGGGGAACTGAGGAGTCTGCTCCTGTGGCTTCCACGACCTAATCCTAACTCCAGGGACTCGCAGGAGTTAGGATTAGGTCGTGGAAGCCAGAGGCGCCTGGGCGC	chr12 + 68833175 68833285	space
mir-1258	CTCTGGCTTCCACGACCTAATCCTAACTCCTGCGAGTCCCTGGAGTTAGGATTAGGTCGTGGAAGCCACAGGA	((.(((((((((((((((((((((((((((...........))))))))))))))))))))))))))).))..	chr12 - 68833200 68833273	intron	98.63	0	-54.5	no	mir-1258	Mammals	b		mir-1258	intron	98.63	A	0	mir-1258	Mammalia		CTCTGGCTTCCACGACCTAATCCTAACTCCTGCGAGTCCCTGGAGTTAGGATTAGGTCGTGGAAGCCACAGGA	chr12 - 68833200 68833273	intron
mir-4437	ACTTTGTGCATTGGGTCCACAAGGAGGGGACGACCTTTGTGGGCTCAGGGTGTAAAGGTT	.((((((((.(((((((((((..((((......))))))))))))))).))))))))...	chr12 - 70277941 70278001	space	93.33	2	-26.2	no		Primates	b, c		mir-4437	space	93.33	C	0		Primates	anotation	ACTTTGTGCATTGGGTCCACAAGGAGGGGACGACCTTTGTGGGCTCAGGGTGTAAAGGTT	chr12 - 70277941 70278001	space
mir-9182	ACTTGATGGTGCTACTTTGAACTGCTTTTCTTTTCTCCTTTTTGCACAAAGAGTCTCATGTCTGATACTTAGACATGATGAGCTTTGTGCAAAAGGGGAGCTGGCTACTTCTTGCTCTGCTTCATCCCACTATTATTTTG	...((((((((.......(((......)))......(((((((((((((((..((((((((((((...)))))))))).)).)))))))))))))))((((.(((........)))..)))).....)))))))).....	chr12 + 78099674 78099814	intron	95.68	0	-47.9	no		Mammals	b		mir-9182	intron	95.68	A	0		Mammalia		ACTTGATGGTGCTACTTTGAACTGCTTTTCTTTTCTCCTTTTTGCACAAAGAGTCTCATGTCTGATACTTAGACATGATGAGCTTTGTGCAAAAGGGGAGCTGGCTACTTCTTGCTCTGCTTCATCCCACTATTATTTTG	chr12 + 78099674 78099814	intron
mir-1245	GTAGGCCTTTAGATCATCTAAAGAGTATTCAACATTAGATGAGCTAAAGGCCTATAC	((((((((((((.((((((((...((.....)).)))))))).))))))))))))..	chr12 - 78103359 78103416	space	100	0	-27.4	no	mir-1245	Primates	a, b		mir-1245	space	100	A	0	mir-1245	Primates	Ref1	GTAGGCCTTTAGATCATCTAAAGAGTATTCAACATTAGATGAGCTAAAGGCCTATAC	chr12 - 78103359 78103416	space
mir-2355	ATCCCCAGATACAGTGGACAATATGCTATTATAATTGTATGGCATTGTCCTTGCTGTTTGGAGATAA	(((.((((((((((.(((((..(((((((.........))))))))))))))).))))))).)))..	chr12 - 96706066 96706133	intron	98.51	1	-24	yes	mir-2355	Mammals	b		mir-2355	intron	98.51	B	1	mir-2355	Mammalia	novel	ATCCCCAGATACAGTGGACAATATGCTATTATAATTGTATGGCATTGTCCTTGCTGTTTGGAGATAA	chr12 - 96706066 96706133	intron
mir-1302-4	AATGCAGAAGCACAGCTTAAATTTGAATTTCAGATAAACAAATTTTTCTTAGAATAAGTATGTCCCCATGCAACATTTGGGACATACTTATGCTAAAACATTATTTGTGTTTCATCTGAAATTCAAATTCAACTGGACATCCTGTATTTT	((((((((.(..(((.((.((((((((((((((((..((((((.....((((.(((((((((((((.(((...)))..))))))))))))).))))......)))))).....)))))))))))))))).)))))..).).)))))))..	chr12 - 96865692 96865842	space	98	0	-51.4	no	mir-1302	Mammals	b		mir-1302-4	space	98	A	0	mir-1302	Mammalia		AATGCAGAAGCACAGCTTAAATTTGAATTTCAGATAAACAAATTTTTCTTAGAATAAGTATGTCCCCATGCAACATTTGGGACATACTTATGCTAAAACATTATTTGTGTTTCATCTGAAATTCAAATTCAACTGGACATCCTGTATTTT	chr12 - 96865692 96865842	space
mir-4775	ATTAAGCTTTTAATTTTTTGTTTTGGTCACTCTTGATAGCAGACATTGACTGAAACAAAAAATTAAAAGCTTTAT	...((((((((((((((((((((((((((.(((.......)))...))))))))))))))))))))))))))...	chr12 + 97366189 97366264	3UTR	98.67	1	-29.8	no		Primates	b, c		mir-4775	3UTR	98.67	B	0		Primates	anotation	ATTAAGCTTTTAATTTTTTGTTTTGGTCACTCTTGATAGCAGACATTGACTGAAACAAAAAATTAAAAGCTTTAT	chr12 + 97366189 97366264	3UTR
mir-4683	GCAGGACGAGGCGGGCCTGGAGGTGCACCAGTTCTGGCCGCTGGTGGAGATCCAATGCTCGCCGGACCTG	.((((....(((((((.((((..(.(((((((.......))))))).)..))))..)))))))...))))	chr12 - 97380150 97380220	CDS	95.71	2	-35.6	no		Primates	b		mir-4683	CDS	95.71	C	0		Primates		GCAGGACGAGGCGGGCCTGGAGGTGCACCAGTTCTGGCCGCTGGTGGAGATCCAATGCTCGCCGGACCTG	chr12 - 97380150 97380220	cds
mir-4776-1	CTATATGCAGTGGACCAGGATGGCAAGGGCTCTCGTGAAAGGACAGTAGAGCCCTTGCCATCCTGGTCCACTGCATATAG	(((((((((((((((((((((((((((((((((..((......))..)))))))))))))))))))))))))))))))))	chr12 + 102459998 102460078	space	98.75	0	-70.7	no	mir-4776	Primates	b, c		mir-4776-1	space	98.75	A	0	mir-4776	Primates	anotation	CTATATGCAGTGGACCAGGATGGCAAGGGCTCTCGTGAAAGGACAGTAGAGCCCTTGCCATCCTGGTCCACTGCATATAG	chr12 + 102459998 102460078	space
mir-4776-2	CTATATGCAGTGGACCAGGATGGCAAGGGCTCTACTGTCCTTTCACGAGAGCCCTTGCCATCCTGGTCCACTGCATATAG	(((((((((((((((((((((((((((((((((..((......))..)))))))))))))))))))))))))))))))))	chr12 - 102459998 102460078	space	98.75	0	-69.7	no	mir-4776	Primates	b, c		mir-4776-2	space	98.75	A	0	mir-4776	Primates	anotation	CTATATGCAGTGGACCAGGATGGCAAGGGCTCTACTGTCCTTTCACGAGAGCCCTTGCCATCCTGGTCCACTGCATATAG	chr12 - 102459998 102460078	space
mir-6809	AATGTTGGCAGGGAAAGGAGAAGAGGATCGTGTTTGCTCCTGTGGACAGCTCTCTGGTGTGCTCCTCCCGTCATCCTGCCCACCCCTGCATAATGCCGCTTCTCTTCTCTCCTTCTCAG	.....(((.(((((...((((((((((.(((((((((....((((.(((.....(((.(.......)))).....))).))))....))).)))).)).))))))))))))))).))).	chr12 - 107525415 107525534	intron	93.1	1	-34.8	no		Primates	b		mir-6809	intron	93.1	B	0		Primates		AATGTTGGCAGGGAAAGGAGAAGAGGATCGTGTTTGCTCCTGTGGACAGCTCTCTGGTGTGCTCCTCCCGTCATCCTGCCCACCCCTGCATAATGCCGCTTCTCTTCTCTCCTTCTCAG	chr12 - 107525415 107525534	intron
mir-6513	GCTTTGGGATTGAGGCCACATATCTCAGGTCCCTAGCTGGTCAAGTGTCATCTGTCCCTAGGCC	((((.(((((.(((((.((....(.(((........))))....))))).)).))))).)))).	chr12 - 107917098 107917162	intron	93.75	0	-18.9	no		Primates	b		mir-6513	intron	93.75	A	0		Primates		GCTTTGGGATTGAGGCCACATATCTCAGGTCCCTAGCTGGTCAAGTGTCATCTGTCCCTAGGC	chr12 - 107917098 107917162	intron
mir-6810	CCCCTTGGGCCTGGGATGGGGACAGGGATCAGCATGGCACAGATCCAGTACCTTCTCTCCCCTACTCCCTTGTTCCCCAGTCCCCTGTGT	(((...)))...((((((((((((((((..((...((.(.(((..........))).))).))..)))).)).)))))).))))......	chr12 + 107983392 107983482	intron	95.71	0	-27.3	no		Primates	b, c		mir-6810	intron	95.71	A	0		Primates	anotation	CTGGGATGGGGACAGGGATCAGCATGGCACAGATCCAGTACCTTCTCTCCCCTACTCCCTTGTTCCCCAG	chr12 + 107983402 107983472	intron
mir-26b	CCACCCTGCCCGGGACCCAGTTCAAGTAATTCAGGATAGGTTGTGTGCTGTCCAGCCTGTTCTCCATTACTTGGCTCGGGGACCGGTGCCCTGCAGCCTTGGGGTGAGGG	.((((((((((((..((((((.((((((((..(((((((((((.(......))))))))))))..))))))))))).)))..)))).))...........))))))....	chr12 + 108056932 108057042	intron	100	0	-52.1	yes	mir-26	Vertebrates	a, b		mir-26b	intron	100	A	1	mir-26	Vertebrata	Ref1	CCACCCTGCCCGGGACCCAGTTCAAGTAATTCAGGATAGGTTGTGTGCTGTCCAGCCTGTTCTCCATTACTTGGCTCGGGGACCGGTGCCCTGCAGCCTTGGGGTGAGGG	chr12 + 108056932 108057042	intron
mir-375	CGACCGCCAGGCCCCGGGCCCTCCGCTCCCGCCCCGCGACGAGCCCCTCGCACAAACCGGACCTGAGCGTTTTGTTCGTTCGGCTCGCGTGAGGCAGGGGCGGCCTCTCAGC	.........((((...))))..(((((((.(((.((((.((((((...((.(((((.((........)).))))).))...)))))))))).))).))))))).........	chr12 - 108686380 108686492	space	100	0	-51.3	yes	mir-375	Vertebrates	a, b		mir-375	space	100	A	1	mir-375	Vertebrata	Ref1	CGACCGCCAGGCCCCGGGCCCTCCGCTCCCGCCCCGCGACGAGCCCCTCGCACAAACCGGACCTGAGCGTTTTGTTCGTTCGGCTCGCGTGAGGCAGGGGCGGCCTCTCAGC	chr12 - 108686380 108686492	space
mir-1240	GTGGGCCAGGGCCGCGGTGGGGAGCAAGCCATCTAGCATTCCTGGGAAACGCTTACATCTCACCATGACCCTGATCCCACTAG	(((((.(((((.((.(((((((.(.((((..(((((.....)))))....)))).).))))))).)).)))))..)))))...	chr12 - 108913661 108913744	intron	98.8	0	-36.1	yes		Primates	a, b		mir-1240	intron	98.8	A	1		Primates	Ref1	GTGGGCCAGGGCCGCGGTGGGGAGCAAGCCATCTAGCATTCCTGGGAAACGCTTACATCTCACCATGACCCTGATCCCACTAG	chr12 - 108913661 108913744	intron
mir-153-1	CTCACAGCTGCCAGTGTCATTTTTGTGATCTGCAGCTAGTATTCTCACTCCAGTTGCATAGTCACAAAAGTGATCATTGGCAGGTGTGGC	.(((((.((((((((((((((((((((((.((((((((((......)))..)))))))..))))))))))))).))))))))).))))).	chr12 - 108984427 108984517	intron	100	0	-48.9	yes	mir-153	Vertebrates	a, b		mir-153-1	intron	100	A	1	mir-153	Vertebrata	Ref1	CTCACAGCTGCCAGTGTCATTTTTGTGATCTGCAGCTAGTATTCTCACTCCAGTTGCATAGTCACAAAAGTGATCATTGGCAGGTGTGGC	chr12 - 108984427 108984517	intron
mir-3132	TGATGACCACTGTGGTGGGATGGGTAGAGAAGGAGCTCAGAGGACTGTGCGCCTTATTTCCCCTGAGCCCTCCCTCTCTCTTCCCACCTGAGGCTCTAGGCTTCCAGATTC	.............(((((((.(((.((((.(((.((((((.(((..(((.....))).))).)))))))))..))))))).))))))).((((((...)))))).......	chr12 - 109234827 109234938	space	94.59	0	-44.6	no	mir-3132	Primates	b, c		mir-3132	space	94.59	A	0	mir-3132	Primates	anotation	TGATGACCACTGTGGTGGGATGGGTAGAGAAGGAGCTCAGAGGACTGTGCGCCTTATTTCCCCTGAGCCCTCCCTCTCTCTTCCCACCTGAGGCTCTAGGCTTCCAGATTC	chr12 - 109234827 109234938	space
mir-5702	GCCTCAGCTCCTGGGATATGCTGCTGGTCCAACCTGAAATCCTTCTGTAGGTTGAGTCAGCAACATATCCCATGACTTTTGGGT	((((.((.((.(((((((((.((((((.((((((((...........))))))).))))))).))))))))).))))...))))	chr12 - 116450449 116450533	space	96.43	0	-35.6	no		Primates	b, c		mir-5702	space	96.43	A	0		Primates	anotation	GCCTCAGCTCCTGGGATATGCTGCTGGTCCAACCTGAAATCCTTCTGTAGGTTGAGTCAGCAACATATCCCATGACTTTTGGGT	chr12 - 116450449 116450533	space
mir-4777	TGGAATATTACGGCATTCTAGATGAGATATATATATGTATACCTCATATGTATGTGGTATACCTCATCTAGAATGCCATAATATTCTA	((((((((((.(((((((((((((((..........(((((((.(((....))).)))))))))))))))))))))).))))))))))	chr12 + 121191252 121191340	intron	93.02	1	-43.7	no		Primates	b		mir-4777	intron	93.02	B	0		Primates		TGGAATATTACGGCATTCTAGATGAGATATATATATGTATACCTCATATGTATGTGGTATACCTCATCTAGAATGCCATAATATTCTA	chr12 + 121191252 121191340	intron
mir-1244-3	ATCTTATTCCGAGCATTCCAGTAACTTTTTTGTGTATGTACTTAGCTGTACTATAAGTAGTTGGTTTGTATGAGATGGTTAAAAA	(((((((.....(((..((((..(((......((((.((((......)))))))))))..))))..)))))))))).........	chr12 + 121548619 121548704	3UTR	100	0	-15	no	mir-1244	Mammals	b		mir-1244-3	3UTR	100	A	0	mir-1244	Mammalia		ATCTTATTCCGAGCATTCCAGTAACTTTTTTGTGTATGTACTTAGCTGTACTATAAGTAGTTGGTTTGTATGAGATGGTTAAAAA	chr12 + 121548619 121548704	3UTR
mir-1471	GGCCGCGTGTGGAGCCAGGTGTGGAGCCGGAGCACAGCTGGCTCTAATTTGAGGGGC	.(((.(...(((((((((.((((.........)))).)))))))))......).)))	chr12 - 121701247 121701304	space	98.25	1	-27.9	no	mir-1471	Primates	b, c		mir-1471	space	98.25	B	0	mir-1471	Primates	anotation	GGCCGCGTGTGGAGCCAGGTGTGGAGCCGGAGCACAGCTGGCTCTAATTTGAGGGGC	chr12 - 121701247 121701304	space
mir-562	AGTGAAATTGCTGGGTCATATGGTCAGTCTACTTTCAGAGTAATTGTGAAAGTATTTTTCAAAGTAGTTGTACCATTTGCATTCCCTGTGGCAAT	......(((((((((.((.((((((((.(((((((.((((((.((....)).))))))..)))))))))).))))).))....)))...))))))	chr12 + 121991265 121991360	intron	98.95	1	-23.7	no	mir-562	Mammals	a, b		mir-562	intron	98.95	B	0	mir-562	Mammalia	Ref1	AGTGAAATTGCTGGGTCATATGGTCAGTCTACTTTCAGAGTAATTGTGAAAGTATTTTTCAAAGTAGTTGTACCATTTGCATTCCCTGTGGCAAT	chr12 + 121991265 121991360	intron
mir-149	GCCGGCGCCCAAGCTCTGGCTCCGTGTCTTCACTCCCGTGTTTGTCCGAGGAGGGAGGGAGGGACGGGGGCTGTGCTGGGGCAGCCGGA	.(((((((((.(((.(.(.((((((.(((((.(((((.(.((.....)).).)))))))))).)))))).).).))).)))).))))).	chr12 + 130324770 130324859	intron	100	0	-54.4	yes	mir-149	Mammals	a, b		mir-149	intron	100	A	1	mir-149	Mammalia	Ref1	GCCGGCGCCCAAGCTCTGGCTCCGTGTCTTCACTCCCGTGTTTGTCCGAGGAGGGAGGGAGGGACGGGGGCTGTGCTGGGGCAGCCGGA	chr12 + 130324770 130324859	intron
mir-762-1	GCCCGGCTCCGGGTTTTGGCCCGTACGGTCCGGCCGGCCATGCTGGCGGGGCTGGGGCTGGAGCCGAGCCC	....(((((..(((((((((((...((((((.((((((...)))))).)))))))))))))))))))))).	chr12 + 131826077 131826148	space	95.77	1	-46.7	no	mir-762	Vertebrates	a, b		mir-762-1	space	95.77	B	0	mir-762	Vertebrata	Ref1	GCCCGGCTCCGGGTTTTGGCCCGTACGGTCCGGCCGGCCATGCTGGCGGGGCTGGGGCTGGAGCCGAGCCC	chr12 + 131826077 131826148	space
mir-1244-2	ATCTTATTCCGAGCATTCCAGTAACTTTTTTGTGTATGTACTTAGCTGTACTATAAGTAGTTGGTTTGTATGAGATGGTTAAAAA	(((((((.....(((..((((..(((......((((.((((......)))))))))))..))))..)))))))))).........	chr13 + 12852878 12852963	3UTR	100	0	-15	no	mir-1244	Mammals	b		mir-1244-2	3UTR	100	A	0	mir-1244	Mammalia		ATCTTATTCCGAGCATTCCAGTAACTTTTTTGTGTATGTACTTAGCTGTACTATAAGTAGTTGGTTTGTATGAGATGGTTAAAAA	chr13 + 12852878 12852963	3UTR
mir-4265	TGCAGTGGGTTGGAGCTTCAGCCTACACCTGTAAAGAACTGGTCAGCCTGGGGACTGGTGATCTCTGCAGCTGTGGGCTCAGCTCTGGGCTGGACCTGG	..((((((.((((((((..((((((((.(((((.((((((((((........)))))))..))).))))).)))))))).)))))))).)))...))).	chr13 - 13681650 13681749	space	97.98	0	-41.8	no		Primates	b, c		mir-4265	space	97.98	A	0		Primates	anotation	TGCAGTGGGTTGGAGCTTCAGCCTACACCTGTAAAGAACTGGTCAGCCTGGGGACTGGTGATCTCTGCAGCTGTGGGCTCAGCTCTGGGCTGGACCTGG	chr13 - 13681650 13681749	space
mir-4267	CTAAGCAGGCTCCAGCTCGGCGGCACTGGGGGAAGGTTCCAGACCCCAGCCTCTGTCATCCCTGCATGGAGCCCACACCTCC	.......(((((((((..((.((((((((((............))))))....))))..))..)).))))))).........	chr13 - 14545501 14545583	space	95.12	1	-31.6	no		Primates	b, c		mir-4267	space	95.12	B	0		Primates	anotation	CTAAGCAGGCTCCAGCTCGGCGGCACTGGGGGAAGGTTCCAGACCCCAGCCTCTGTCATCCCTGCATGGAGCCCACACCTCC	chr13 - 14545501 14545583	space
mir-4435-1	AGGCAGCAAATGGCCAGAGTTCATACAGAGGGATGAGTGCACTTCACCTGCAATGTGACTCAGCAGGCCAACAGATGCTA	.((((.....(((((.((((.((((..(.(((.((((.....))))))).)..))))))))....))))).....)))).	chr13 - 15450350 15450430	space	96.25	2	-24.1	no	mir-4435	Primates	b, c		mir-4435-1	space	96.25	C	0	mir-4435	Primates	anotation	AGGCAGCAAATGGCCAGAGTTCATACAGAGGGATGAGTGCACTTCACCTGCAATGTGACTCAGCAGGCCAACAGATGCTA	chr13 - 15450350 15450430	space
mir-4436b-1	GTGTCCTCACTTGTCCACTTCTGCCTGCCCTGCCCAAATCACGGAGCAGATTCGAGGGGCAGGGCAGGCAGAAGTGGAAAAGTAAGGCCAT	(((.(((.((((.((((((((((((((((((((((......((((.....))))..)))))))))))))))))))))).)))).))).)))	chr13 + 19526843 19526934	space	93.41	0	-60.8	no	mir-4436	Primates	b, c		mir-4436b-1	space	93.41	A	0	mir-4436	Primates	anotation	GTGTCCTCACTTGTCCACTTCTGCCTGCCCTGCCCAAATCACGGAGCAGATTCGAGGGGCAGGGCAGGCAGAAGTGGAAAAGTAAGGCCAT	chr13 + 19526843 19526934	space
mir-548i-2	AGGTTGGCGTAAAAGTAATTGCAGTTTTTGCCATTAAAACTTTTTTGCCATTACTGTTAATGGCAAAAACTGCAATTACTTTTGCACCAACCT	(((((((.(((((((((((((((((((((((((((((...................))))))))))))))))))))))))))))).)))))))	chr13 - 19917650 19917743	space	93.15	1	-52.2	no	mir-548	Primates	b		mir-548i-2	space	93.15	B	0	mir-548	Primates		AGGTTGGCGTAAAAGTAATTGCAGTTTTTGCCATTAAAACTTTTTTGCCATTACTGTTAATGGCAAAAACTGCAATTACTTTTGCACCAACCT	chr13 - 19917650 19917743	space
mir-4780	GGCCAGTGCCAGGGGGTCAGGCTCACGGACCAGCCCAAAGGCCAGGCCTGACCCTTGAGCCTGACCCCTAGCACTGATCCC	((.((((((..((((((((((((((.((..(((.((........)).)))..)).)))))))))))))).))))))..)).	chr13 + 20334350 20334431	space	97.53	1	-49	no		Primates	b, c		mir-4780	space	97.53	B	0		Primates	anotation	GGCCAGTGCCAGGGGGTCAGGCTCACGGACCAGCCCAAAGGCCAGGCCTGACCCTTGAGCCTGACCCCTAGCACTGATCCC	chr13 + 20334350 20334431	space
mir-6071	GTTTCTGCTGCCAGCCAAGGCTCTGGGTCTGGCTTACTCCCTAGCTTACTGTCCTCAGAACCTCTGCCACCACGGAAG	..(((((.((...((..(((.((((((...((((........))))......)).)))).)))..))...))))))).	chr13 + 23655169 23655247	space	93.59	1	-20.5	no		Primates	b, c		mir-6071	space	93.59	B	0		Primates	anotation	GTTTCTGCTGCCAGCCAAGGCTCTGGGTCTGGCTTACTCCCTAGCTTACTGTCCTCAGAACCTCTGCCACCACGGAAG	chr13 + 23655169 23655247	space
mir-8080	ATGGCTCTAAGAAGGACACTGGTGTCAACGGCTGAGCCCTTTGATAAGGGGGAAGTTTGGAAGACTCTTATGTCCTGGATTGGGAAATG	.....(((((..((((((..((.(((..(((((...(((((....)))))...)).)))...))).))..))))))...))))).....	chr13 + 29837226 29837315	space	97.75	0	-26.1	no		Primates	b, c		mir-8080	space	97.75	A	0		Primates	anotation	ATGGCTCTAAGAAGGACACTGGTGTCAACGGCTGAGCCCTTTGATAAGGGGGAAGTTTGGAAGACTCTTATGTCCTGGATTGGGAAATG	chr13 + 29837226 29837315	space
mir-5000	CTGAAGAGTAGAGTGTGTGGTCCAGGTTCAGAAGTGTTCCCGAGTAACTTGTGCTTATAACTCAGGACACTTCTGAACTTGGACCATACAGGTCTCCCTGCTT	.....((((((((((((((((((((((((((((((((.((.((((..............)))).))))))))))))))))))))))))))...)))..)))))	chr13 - 34805683 34805786	space	97.09	0	-52.3	no		Primates	b, c		mir-5000	space	97.09	A	0		Primates	anotation	CTGAAGAGTAGAGTGTGTGGTCCAGGTTCAGAAGTGTTCCCGAGTAACTTGTGCTTATAACTCAGGACACTTCTGAACTTGGACCATACAGGTCTCCCTGCTT	chr13 - 34805683 34805786	space
mir-3126	ATGATTATATGAGGGACAGATGCCAGAAGCACTGGTTATGATTTGGATCTGGCATCTCTCACACAGATAATTAT	((((((((.((...((.((((((((((..((............))..)))))))))).))...)).))))))))	chr13 - 40886543 40886617	intron	95.95	0	-22.9	no	mir-3126	Primates	b, c		mir-3126	intron	95.95	A	0	mir-3126	Primates	anotation	ATGATTATATGAGGGACAGATGCCAGAAGCACTGGTTATGATTTGGATCTGGCATCTCTCACACAGATAATTAT	chr13 - 40886543 40886617	intron
mir-4434	TCACTTTAGGATAAGTAAAGTAGAACTTTGGTTTTCAACTTTTCCTATGGTGT	.((((.(((((.((((...(.(((((....)))))).)))).))))).)))).	chr13 - 45478312 45478365	intron	94.34	1	-15.2	no		Primates	b, c		mir-4434	intron	94.34	B	0		Primates	anotation	TCACTTTAGGATAAGTAAAGTAGAACTTTGGTTTTCAACTTTTCCTATGGTGT	chr13 - 45478312 45478365	intron
mir-4433b	TGTGTCCCCTATCCTCCTTATGTCCCACCCCCACTCCTGTTTGAATATTTCACCAGAAACAGGAGTAGGGGTGGGACGTAAGGAGGATGTGGGAAAGGACAT	.((((((((((((((((((((((((((((((.((((((((((..............)))))))))).)))))))))))))))))))))).))....))))))	chr13 + 45661194 45661296	space	95.1	0	-68.8	no	mir-4433	Primates	b, c		mir-4433b	space	95.1	A	0	mir-4433	Primates	anotation	TGTGTCCCCTATCCTCCTTATGTCCCACCCCCACTCCTGTTTGAATATTTCACCAGAAACAGGAGTAGGGGTGGGACGTAAGGAGGATGTGGGAAAGGACA	chr13 + 45661194 45661296	space
mir-4433a	CATCCTCCTTACGTCCCACCCCTACTCCTGTTTCTGGTGAAATATTCAAACAGGAGTGGGGGTGGGACATAAGGAGGATAG	.((((((((((.((((((((((((((((((((..(((........))))))))))))))))))))))).))))))))))..	chr13 - 45661202 45661283	space	97.53	0	-59.1	no	mir-4433	Primates	b, c		mir-4433a	space	97.53	A	0	mir-4433	Primates	anotation	CATCCTCCTTACGTCCCACCCCTACTCCTGTTTCTGGTGAAATATTCAAACAGGAGTGGGGGTGGGACATAAGGAGGATA	chr13 - 45661202 45661283	space
mir-7975	GAGCAAAGAGCAGGAGGACAGGGGATTGATCTCCCAAGGGAGGTCCCCTGATCCGAGTCACGGCACCA	..((...((...(((...((((((((....((((....)))))))))))).)))...))...))....	chr13 - 48108311 48108379	intron	95.59	1	-26.4	no		Primates	b		mir-7975	intron	95.59	B	0		Primates		GAGCAAAGAGCAGGAGGACAGGGGATTGATCTCCCAAGGGAGGTCCCCTGATCCGAGTCACGGCACCA	chr13 - 48108311 48108379	intron
mir-4432	GCATCTTGCAGAGCCGTTCCAATGTGACACCTCTAGAGTGTCATCCCCTAGAATATCACCTTGGAAAGGCTCTGCAAGATGCCT	(((((((((((((((.((((((.((((....(((((.(.(....)).)))))...)))).)))))).)))))))))))))))..	chr13 + 49742157 49742241	space	96.43	1	-46.6	no		Primates	b, c		mir-4432	space	96.43	B	0		Primates	anotation	GCATCTTGCAGAGCCGTTCCAATGTGACACCTCTAGAGTGTCATCCCCTAGAATATCACCTTGGAAAGGCTCTGCAAGATGCCT	chr13 + 49742157 49742241	space
mir-216b	GCAGACTGGAAAATCTCTGCAGGCAAATGTGATGTCACTGAAGAAATCACACACTTACCCGTAGAGATTCTACAGTCTGACA	.(((((((...(((((((((.((.((.((((((.((......)).))))))...)).)).)))))))))...)))))))...	chr13 + 54036426 54036508	space	100	0	-32.4	no	mir-216	Vertebrates	a, b		mir-216b	space	100	A	0	mir-216	Vertebrata	Ref1	GCAGACTGGAAAATCTCTGCAGGCAAATGTGATGTCACTGAAGAAATCACACACTTACCCGTAGAGATTCTACAGTCTGACA	chr13 + 54036426 54036508	space
mir-1461	ATCTCTACGGGTAAGTGTGTGATTTCTTCAGTGACATCACATTTGCCTGCAGAGAT	((((((.(((((((..(((((((.((......)).)))))))))))))).))))))	chr13 - 54036438 54036494	space	98.21	0	-24.3	no		Mammals	b, c		mir-1461	space	98.21	A	0		Mammalia	anotation	ATCTCTACGGGTAAGTGTGTGATTTCTTCAGTGACATCACATTTGCCTGCAGAGAT	chr13 - 54036438 54036494	space
mir-216a	GATGGCTGTGAGTTGGCTTAATCTCAGCTGGCAACTGTGAGATGTTCATACAATCCCTCACAGTGGTCTCTGGGATTACGCTAAACAGAGCAATTTCCTTGCCCTCGCGA	....(((.((..(((((.(((((((((..(((.((((((((.(((....)))....)))))))).))).))))))))).))))).)).))).......((((....))))	chr13 + 54048315 54048425	space	100	0	-39.2	no	mir-216	Vertebrates	a, b		mir-216a	space	100	A	0	mir-216	Vertebrata	Ref1	GATGGCTGTGAGTTGGCTTAATCTCAGCTGGCAACTGTGAGATGTTCATACAATCCCTCACAGTGGTCTCTGGGATTACGCTAAACAGAGCAATTTCCTTGCCCTCGCGA	chr13 + 54048315 54048425	space
mir-217	AATATAATTATTACATAGTTTTTGATGTCGCAGATACTGCATCAGGAACTGATTGGATAAGAATCAGTCACCATCAGTTCCTAATGCATTGCCTTCAGCATCTAAACAAG	.................((((..(((((.(.((.((.(((((.((((((((((.((((........))).).)))))))))).))))).)).)).).))))).))))...	chr13 + 54054227 54054337	space	100	0	-31.4	no	mir-217	Vertebrates	a, b		mir-217	space	100	A	0	mir-217	Vertebrata	Ref1	AATATAATTATTACATAGTTTTTGATGTCGCAGATACTGCATCAGGAACTGATTGGATAAGAATCAGTCACCATCAGTTCCTAATGCATTGCCTTCAGCATCTAAACAAG	chr13 + 54054227 54054337	space
mir-4431	TGTTCTGCGACTCTGAAAACTAGGAGGTTTATGATTGGGCATTTCTCACCCGATGCCCAATATTGAACTTCCTAGTTGTCAGAGTCATTAACCA	........((((((((.((((((((((((((..((((((((((........))))))))))..)))))))))))))).))))))))........	chr13 + 57443820 57443914	space	92.55	1	-50.2	no		Primates	b		mir-4431	space	92.55	B	0		Primates		TGTTCTGCGACTCTGAAAACTAGGAGGTTTATGATTGGGCATTTCTCACCCGATGCCCAATATTGAACTTCCTAGTTGTCAGAGTCATTAACCA	chr13 + 57443820 57443914	space
mir-9153	CGTTAACCGGGGTGTCGGCCAGGAGCGTCGCGGGCTCAGCGCAGAAGATGGAGAAGCTGAGCTGCAGGCGGCCGCCGCGCGTCAGGATCAGCTCTAGGAAGTCGCAGAAGCCCTCGTCGTCGAAGTAGAGCACGAGGCCGCGGGCGCTGCGCGTCTTGAGCTGGA	......((((.(((.((((..((..((((((((.((((((...............)))))))))).)))).))))))))).)).))..((((((.((((.(.(((((..((((.((.(.(((..........))).).)).)))).)))))).))))))))))..	chr13 - 59214471 59214636	space	94.48	1	-73.3	no		Mammals	b, c		mir-9153	space	94.48	B	0		Mammalia	anotation	GGTGTCGGCCAGGAGCGTCGCGGGCTCAGCGCAGAAGATGGAGAAGCTGAGCTGCAGGCGGCCGCCGCGCGTCAGGATCAGCTCTAGGAAGTCGCAGAAGCCCTCGTCGTCGAAGTAGAGCACGAGGCCGCGGGCGCTGCGCGTC	chr13 - 59214481 59214626	space
mir-559	CTCCAGTAACATCTTAAAGTAAATATGCACCAAAATAACTTTCAGTAAATATGGTTTTGGTGCATATTTACTTTAGGATGTTACTGGAGCTCCCA	((((((((((((((((((((((((((((((((((((.................))))))))))))))))))))))))))))))))))))......	chr13 - 62999893 62999988	intron	95.79	0	-54.1	no	mir-559	Primates	b, c		mir-559	intron	95.79	A	0	mir-559	Primates	anotation	CTCCAGTAACATCTTAAAGTAAATATGCACCAAAATAACTTTCAGTAAATATGGTTTTGGTGCATATTTACTTTAGGATGTTACTGGAGCTCCCA	chr13 - 62999893 62999988	intron
mir-559	TGGGAGCTCCAGTAACATCCTAAAGTAAATATGCACCAAAACCATATTTACTGAAAGTTATTTTGGTGCATATTTACTTTAAGATGTTACTGGAGCTCATCCAC	(((((((((((((((((((.(((((((((((((((((((((....((((.....))))..))))))))))))))))))))).))))))))))))))))..))).	chr13 + 62999893 62999997	space	93.27	0	-59.1	no	mir-559	Primates	b		mir-559	space	93.27	A	0	mir-559	Primates		TGGGAGCTCCAGTAACATCCTAAAGTAAATATGCACCAAAACCATATTTACTGAAAGTTATTTTGGTGCATATTTACTTTAAGATGTTACTGGAGCTCATCCA	chr13 + 62999893 62999997	space
mir-703	TAAAACCTTCAGAAGGAAAGGAGAATGTTTTGTGGACCACTTTGGTTTTCTTTTTTGCGTGTGGCAGTTTTA	((((((..(((.(.(.(((((((((.........(((((...)))))))))))))).).).)))..))))))	chr13 + 71228075 71228147	intron	100	0	-14.8	no	mir-703	Vertebrates	b, c		mir-703	intron	100	A	0	mir-703	Vertebrata	anotation	TAAAACCTTCAGAAGGAAAGGAGAATGTTTTGTGGACCACTTTGGTTTTCTTTTTTGCGTGTGGCAGTTTTA	chr13 + 71228075 71228147	intron
mir-548ad	CTATTAGGTTGGTGCAAAAGTAATTGTGGTTTTTGAAAGTAACTTGGCGAAAACCACAATGACTTTGCACCAACCTAATACA	.(((((((((((((((((.((.(((((((((((((.(((...)))..))))))))))))).)))))))))))))))))))..	chr13 - 75230945 75231027	space	95.12	0	-43.9	yes	mir-548	Primates	b		mir-548ad	space	95.12	A	1	mir-548	Primates	novel	CTATTAGGTTGGTGCAAAAGTAATTGTGGTTTTTGAAAGTAACTTGGCGAAAACCACAATGACTTTGCACCAACCTAATAC	chr13 - 75230945 75231027	space
mir-548aq	GAAAGTAATTGAAGTTCTTGCCATTACTTTCAGTGGCAAAACTGCAATTACTTTTGCA	(((((((((((.((((.((((((((......)))))))))))).)))))))))))...	chr13 + 75601003 75601061	space	93.1	1	-23.7	no	mir-548	Primates	a		mir-548aq	space	93.1	B	0	mir-548	Primates	Ref2	GAAAGTAATTGAAGTTCTTGCCATTACTTTCAGTGGCAAAACTGCAATTACTTTTGC	chr13 + 75601003 75601061	space
mir-4765	TGGTGATTTTGAACGTAGCTATCAACCACTCAACCTGGAAAAAGCTGAGTGATTGATAGCTATGTTCAAAATCACCA	(((((((((((((((((((((((((.((((((..((......)).)))))).)))))))))))))))))))))))))	chr13 - 78092913 78092990	intron	97.4	0	-47.4	no		Primates	b, c		mir-4765	intron	97.4	A	0		Primates	anotation	TGGTGATTTTGAACGTAGCTATCAACCACTCAACCTGGAAAAAGCTGAGTGATTGATAGCTATGTTCAAAATCACCA	chr13 - 78092913 78092990	intron
mir-558	GTGTGTGTGTGTGTTTGTGTTTATTTTGGCATAGTAGCTCTAGACTCTATTATAGTTTCCTGAGCTGCTGTACCAAAATACCACAAACTGCCTG	........(((.(((((((..((((((((.((((((((((..((..(((...)))..))..)))))))))).)))))))).))))))))))...	chr13 - 78195333 78195427	intron	100	0	-34.7	no	mir-558	Primates	a, b		mir-558	intron	100	A	0	mir-558	Primates	Ref1	GTGTGTGTGTGTGTTTGTGTTTATTTTGGCATAGTAGCTCTAGACTCTATTATAGTTTCCTGAGCTGCTGTACCAAAATACCACAAACTGCCTG	chr13 - 78195333 78195427	intron
mir-4263	ATAGGGCTCTTCAGAGTTTTACTTGGGAGACTGGAGTGGCCAGTGTTCCTAAACAATTCTAAGTGCCTTGTCCCACAACATAC	(((((((.(((.((((((......((((.(((((.....))))).)))).....))))))))).)))))))............	chr13 - 82824402 82824485	intron	95.18	1	-28.2	no		Primates	b		mir-4263	intron	95.18	B	0		Primates		ATAGGGCTCTTCAGAGTTTTACTTGGGAGACTGGAGTGGCCAGTGTTCCTAAACAATTCTAAGTGCCTTGTCCCACAACATAC	chr13 - 82824402 82824485	intron
mir-548h	AGAAGTAATTGCTGTTTTTGCCATTACTTTTAAAGACAAAAACTGCAGTGACTTCTGT	((((((.(((((.(((((((.(.(((....))).).))))))).))))).))))))..	chr13 - 84035294 84035352	intron	100	0	-18.1	no	mir-548	Primates	a, b		mir-548h	intron	100	A	0	mir-548	Primates	Ref1 Ref2	AGAAGTAATTGCTGTTTTTGCCATTACTTTTAAAGACAAAAACTGCAGTGACTTCTGT	chr13 - 84035294 84035352	intron
mir-1301	CTGCCAAGCGACCCCTAGAATGGGGATTGTGGGGGGTCGCTCTAGGCACCGCAGCACTGTGCTGGGGATGTTGCAGCTGCCTGGGAGTGACTTCACACAGTCCTCTCTGCCT	...............((((..((((((((((.(((((((((((((((((.((((((((.......)).)))))).).))))).))))))))))).))))))))))))))...	chr13 + 85571464 85571576	intron	100	0	-51.1	yes	mir-1301	Mammals	b, c		mir-1301	intron	100	A	1	mir-1301	Mammalia	anotation	CTGCCAAGCGACCCCTAGAATGGGGATTGTGGGGGGTCGCTCTAGGCACCGCAGCACTGTGCTGGGGATGTTGCAGCTGCCTGGGAGTGACTTCACACAGTCCTCTCTGCCT	chr13 + 85571464 85571576	intron
mir-548g	AGAGTAATTGTGGTTTCTGTCATGAAAAGTATGGCAAAAACCATAATTACTTTTG	.(((((((((((((((.(((((((.....))))))).)))))))))))))))...	chr13 + 91957209 91957264	space	100	0	-24.8	no	mir-548	Primates	a, b		mir-548g	space	100	A	0	mir-548	Primates	Ref1	AGAGTAATTGTGGTTTCTGTCATGAAAAGTATGGCAAAAACCATAATTACTTTTG	chr13 + 91957209 91957264	space
mir-4429	CATAAACTCCACAGGTGTTATTGAAGGGAGAAAAGCTGGGCTGAGAGGCGACTGGTGTCTAACCTGTTCGTCTCTCCAACTCAGACTGCCTGACCCACAGCCACAGCTCGGCCCTGAGCTGCTCTGACATCT	............((((((((..(..(((.....(((((((..((((((((((.(((.....))).).)))))))))...))))).))......))).......(((((((....))))))))..))))))))	chr13 + 99445119 99445251	space	95.37	0	-43.8	no	mir-4429	Primates	b, c		mir-4429	space	95.37	A	0	mir-4429	Primates	anotation	ACAGGTGTTATTGAAGGGAGAAAAGCTGGGCTGAGAGGCGACTGGTGTCTAACCTGTTCGTCTCTCCAACTCAGACTGCCTGACCCACAGCCACAGCTCGGCCCTGAGCTGC	chr13 + 99445129 99445241	space
mir-4261	GGCAGAAGTGGGTTCCTCCCAGATCCTCAGACAGGAAACAGGGACCCAGGAGACCAGC	((......(((((((((......((((.....))))...))))))))).....))...	chr13 + 100781154 100781212	space	93.1	0	-17.8	no		Primates	b, c		mir-4261	space	93.1	A	0		Primates	anotation	GGCAGAAGTGGGTTCCTCCCAGATCCTCAGACAGGAAACAGGGACCCAGGAGACCAGC	chr13 + 100781154 100781212	space
mir-6743	GGGTAAAGGGACAGGGACGGGTGGCCCCAGGAAGAGGGGCCTGGTGGAGCCGCTCGTCTCCCTGCCCACAG	((((..(((((....((((((((((((((((........))))..)).)))))))))))))))))))....	chr14 + 20569 20640	intron	95.77	1	-38.5	no		Primates	b, c		mir-6743	intron	95.77	B	0		Primates	anotation	GGGTAAAGGGACAGGGACGGGTGGCCCCAGGAAGAGGGGCCTGGTGGAGCCGCTCGTCTCCCTGCCCACAG	chr14 + 20569 20640	intron
mir-210	GCCCACCCGGCAGTCCCTCCAGGCGCAGGGCAGCCCCTGCCCACCGCACACTGCGCTGCCCCAGACCCACTGTGCGTGTGACAGCGGCTGATCTGTGCCTGGGCAGCGCGA	(((.....)))......(((((((((((..(((((.(((..(((((((((.((.((((...))).).)).)))))).))).))).)))))..)))))))))))........	chr14 - 385597 385708	space	100	0	-54.4	yes	mir-210	Vertebrates	a, b		mir-210	space	100	A	1	mir-210	Vertebrata	Ref1	GCCCACCCGGCAGTCCCTCCAGGCGCAGGGCAGCCCCTGCCCACCGCACACTGCGCTGCCCCAGACCCACTGTGCGTGTGACAGCGGCTGATCTGTGCCTGGGCAGCGCGA	chr14 - 385597 385708	space
mir-675	CCCAGGGTCTGGTGCGGAGAGGGCCCACAGTGGACTTGGTGACACTGTATGCCCTCACCGCTCAGCCCCTGGG	(((((((.((((.((((.((((((..((((((..........))))))..)))))).)))))))).)))))))	chr14 - 1967017 1967090	CDS	100	0	-48.2	no	mir-675	Mammals	a, b		mir-675	cds	100	A	0	mir-675	Mammalia	Ref1	CCCAGGGTCTGGTGCGGAGAGGGCCCACAGTGGACTTGGTGACACTGTATGCCCTCACCGCTCAGCCCCTGGG	chr14 - 1967017 1967090	cds
mir-3164	CTTGGAAACTGTGACTTTAAGGGAAATGACGCACAGCAGGCCCTGGAATCACGCCGTTTTGCTTGAAGTTGCAGTTTCCCAGG	((.((((((((((((((((((.((((((.((.....(((...)))......)).)))))).)))))))))))))))))).)).	chr14 - 5677587 5677670	intron	93.98	1	-35.9	yes		Primates	b		mir-3164	intron	93.98	B	2		Primates	novel	CTTGGAAACTGTGACTTTAAGGGAAATGACGCACAGCAGGCCCTGGAATCACGCCGTTTTGCTTGAAGTTGCAGTTTCCCAGG	chr14 - 5677587 5677670	intron
mir-4691	GGAGCACTCCCAGGTCCTCCAGGCCATGAGCTGCGACCCTGATGTCTCTACTCCAGCCACAGACTGGGAGCGCATAGGAGTGTCC	(((.((((((...((.((((.(((..((.((((.((....((....))...))))))))..).)).)))).))...)))))))))	chr14 - 6660857 6660942	intron	95.29	0	-28.3	no		Primates	b, c		mir-4691	intron	95.29	A	0		Primates	anotation	GGAGCACTCCCAGGTCCTCCAGGCCATGAGCTGCGACCCTGATGTCTCTACTCCAGCCACAGACTGGGAGCGCATAGGAGTGTCC	chr14 - 6660857 6660942	intron
mir-7113	CTCCAGGGAGACAGTGTGCGAGGCCCCTGCCACGGCCTCCCTGCCCGCCTCTCTGCAGA	((.(((((((...(((.((((((((........))))))...)).)))))))))).)).	chr14 - 6661916 6661975	intron	93.22	0	-24.7	no		Primates	b		mir-7113	intron	93.22	A	0		Primates		CTCCAGGGAGACAGTGTGCGAGGCCCCTGCCACGGCCTCCCTGCCCGCCTCTCTGCAG	chr14 - 6661916 6661975	intron
mir-3163	TTCCTCATGTATAAAATGAGGGCATTAAGACCTTCCTTCCTTATATTACTGCCCCCATTTTATAGATGAGGAA	.(((((((.(((((((((.(((((.(((.................))).))))).))))))))).))))))).	chr14 + 7534919 7534992	intron	93.15	1	-30.4	no		Primates	b		mir-3163	intron	93.15	B	0		Primates		TTCCTCATGTATAAAATGAGGGCATTAAGACCTTCCTTCCTTATATTACTGCCCCCATTTTATAGATGAGGAA	chr14 + 7534919 7534992	intron
mir-3577	TGTGGCAGCCCTGAGAGCCAGGTGGAGTTGTCCTTTCATCTGTCCCTCTTGGCTGCCAGC	..((((((((..(((.(.(((((((((......))))))))).).)))..))))))))..	chr14 + 7589974 7590034	intron	100	0	-30.7	no		Mammals	a, b		mir-3577	intron	100	A	0		Mammalia	Ref1	TGTGGCAGCCCTGAGAGCCAGGTGGAGTTGTCCTTTCATCTGTCCCTCTTGGCTGCCAGC	chr14 + 7589974 7590034	intron
mir-4489	GGGGGTGGGGCTGGTGATGCAGGACGCTGGGGACTGGGGAAGTCCTGCCTGACCCTGTCCCC	(((((((((((.(((....(((....)))((((((.....))))))))).).))))))))))	chr14 - 8835884 8835946	intron	95.16	1	-27.6	no		Primates	b		mir-4489	intron	95.16	B	0		Primates		GGGGGTGGGGCTGGTGATGCAGGACGCTGGGGACTGGGGAAGTCCTGCCTGACCCTGTCCCC	chr14 - 8835884 8835946	intron
mir-4690	GAGCAGGCGAGGCTGGGCTGAACCCGTGGGTGAGAAGTGCAGCCCAGCTGAGGTCTCTGC	.((.((((..((((((((((.((.(........)..)).))))))))))...))))))..	chr14 - 8849509 8849569	intron	96.67	0	-25.4	no		Primates	b, c		mir-4690	intron	96.67	A	0		Primates	anotation	GAGCAGGCGAGGCTGGGCTGAACCCGTGGGTGAGAAGTGCAGCCCAGCTGAGGTCTCTGC	chr14 - 8849509 8849569	intron
mir-612	TCTCATCTGGACCCCGCTGGGGAGGGCTTCTGAGCTCCTCAGCACTGGCAGGAGGGGCTCCAGGGGCCCTCCCTCCATGGCAGCCAGGACAGGACTCTCA	(((..(((((...(((..((((((((((((((((((((((.((....))..)))))))).))))))))))))))...)))...)))))..))).......	chr14 - 9059067 9059167	3UTR	99	0	-54.1	no	mir-612	Primates	a, b		mir-612	3UTR	99	A	0	mir-612	Primates	Ref1	TCTCATCTGGACCCCGCTGGGGAGGGCTTCTGAGCTCCTCAGCACTGGCAGGAGGGGCTCCAGGGGCCCTCCCTCCATGGCAGCCAGGACAGGACTCTCA	chr14 - 9059067 9059167	3UTR
mir-6751	TCTTCTGGGGGGTGAGGTTGGTGTCTGGCCCCAGCAGCCCAGACTGAGCCTTTCTCTCTCTCTCCAG	....((((((((.((((..(((((((((.(......).))))))...)))....)))).))))))))	chr14 + 9399961 9400028	intron	98.41	1	-26.9	no		Primates	b		mir-6751	intron	98.41	B	0		Primates		TCTTCTGGGGGGTGAGGTTGGTGTCTGGCCCCAGCAGCCCAGACTGAGCCTTTCTCTCTCTCTCCAG	chr14 + 9399961 9400028	intron
mir-6879	CAGAGCAGGGCAGGGAAGGTGGGAGAGGGGCCCAGCTGACCCTCTTGTCACCTGCTTCTTGCCCAG	.......((((((((((((((((((((((..........))))))).))))))..)))))))))..	chr14 - 9522467 9522533	intron	95.45	0	-33.7	no		Primates	b, c		mir-6879	intron	95.45	A	0		Primates	anotation	CAGAGCAGGGCAGGGAAGGTGGGAGAGGGGCCCAGCTGACCCTCTTGTCACCTGCTTCTTGCCCAG	chr14 - 9522467 9522533	intron
mir-194-2	TGGCTCCCGCCCCCTGTAACAGCAACTCCATGTGGAAGTGTCCACTGATTCCAGTGGGGCTGCTGTTATCTGGGGCGAGGGCCGG	((((((.((((((..(((((((((.((((((.(((((...........))))))))))).)))))))))..)))))).)))))).	chr14 + 9660229 9660314	space	100	0	-50.1	yes	mir-194	Vertebrates	a, b		mir-194-2	space	100	A	1	mir-194	Vertebrata	Ref1	TGGCTCCCGCCCCCTGTAACAGCAACTCCATGTGGAAGTGTCCACTGATTCCAGTGGGGCTGCTGTTATCTGGGGCGAGGGCCGG	chr14 + 9660229 9660314	space
mir-192	GAGACCGAGTGCACAGGGCTCTGACCTATGAATTGACAGCCAGTGCTCTCGTCTCCCCTCTGGCTGCCAATTCCATAGGTCACAGGTATGTTCGCCTCAATGCCAGCCACCA	......(((.(((((.(.((.((((((((((((((.(((((((................))))))).))))).))))))))).)).).)))..)))))..............	chr14 + 9660425 9660537	space	100	0	-39	yes	mir-192	Vertebrates	a, b		mir-192	space	100	A	1	mir-192	Vertebrata	Ref1	GAGACCGAGTGCACAGGGCTCTGACCTATGAATTGACAGCCAGTGCTCTCGTCTCCCCTCTGGCTGCCAATTCCATAGGTCACAGGTATGTTCGCCTCAATGCCAGCCACCA	chr14 + 9660425 9660537	space
mir-6748	TGGTGTGTGGGTGGGAAGGACTGGATTTGAAATGGTCCCATTCCTGACACTCCTGTCCCTGTCTCCCACAG	.....((((((.((.(.((((.(((..((....((.......))...)).))).)))).).)).)))))).	chr14 - 11474341 11474412	intron	94.37	0	-22.8	no		Primates	b, c		mir-6748	intron	94.37	A	0		Primates	anotation	TGGTGTGTGGGTGGGAAGGACTGGATTTGAAATGGTCCCATTCCTGACACTCCTGTCCCTGTCTCCCACAG	chr14 - 11474341 11474412	intron
mir-6747	TTTGGAGGGGTGTGGAAAGAGGCAGAACATTCATTCACTTTCCTCCCTTCCTCTGCACCAG	...(((((((...((((((.((..((....))..)).)))))).)))))))..........	chr14 + 11707827 11707888	intron	96.72	0	-19.1	no		Primates	b, c		mir-6747	intron	96.72	A	0		Primates	anotation	TTTGGAGGGGTGTGGAAAGAGGCAGAACATTCATTCACTTTCCTCCCTTCCTCTGCACCAG	chr14 + 11707827 11707888	intron
mir-6746	CTTGCCCAGGAGAAGGAGGTGGCCTGGAGAGCTGCTGTCTCCAGCCACTGCCTGTCTCCACAG	........((((((((.((((((.((((((.......)))))))))))).))).)))))....	chr14 + 12333735 12333798	intron	95.24	1	-32	no		Primates	b, c		mir-6746	intron	95.24	B	0		Primates	anotation	CTTGCCCAGGAGAAGGAGGTGGCCTGGAGAGCTGCTGTCTCCAGCCACTGCCTGTCTCCACAG	chr14 + 12333735 12333798	intron
mir-611	AAAATGGTGAGAGGGTTAAGGGGAGTTCCCGACGGAGATGCGAGGACCCCTCGGGGTCTGACCC	.....(((.(((......(((((...(((((.((....)))).)))))))).....))).))).	chr14 + 12474550 12474617	overlap	100	0	-21.61	no	mir-611	Primates	a, b		mir-611	overlap	100	A	0	mir-611	Primates	Ref1	AAAATGGTGAGAGGGTTAAGGGGAGTTCCCGACGGAGATGCGAGGACCCCTCGGGGTCTGACCCACA	chr14 + 12474550 12474617	overlap
mir-4488	CGGTGGGCTGGATGGGCAGGTAGGGGGCGGGCTCCGGCGCTGGGACCCCGCTCGGGTGGCGCCTTGGCCCCGCCCCGCCCCGCCCTCCCTCCGCCTCATTGGCAGCCGC	.((((((..(((.((((.((...((((((((((..((((((...((((.....))))))))))..)).))))))))...))))))))).))))))..............	chr14 - 12755964 12756073	space	96.33	0	-61.8	no	mir-4488	Primates	b, c		mir-4488	space	96.33	A	0	mir-4488	Primates	anotation	CGGTGGGCTGGATGGGCAGGTAGGGGGCGGGCTCCGGCGCTGGGACCCCGCTCGGGTGGCGCCTTGGCCCCGCCCCGCCCCGCCCTCCCTCCGCCTCATTGGCAGCCGC	chr14 - 12755964 12756073	space
mir-6503-2	AATGGTCCCCGAGGGAGGTCTGCATTCTAATCCCCAGAAGCGAAGGATTAGGGGGACAAGGATGCAGACCTCCCTGGGGGACCATTA	((((((((((.(((((((((((((((((..(((((..((........))..)))))..))))))))))))))))).)))))))))).	chr14 - 13926370 13926457	intron	93.02	1	-66.6	yes		Primates	b		mir-6503-2	intron	93.02	B	2		Primates		AATGGTCCCCGAGGGAGGTCTGCATTCTAATCCCCAGAAGCGAAGGATTAGGGGGACAAGGATGCAGACCTCCCTGGGGGACCATT	chr14 - 13926370 13926457	intron
mir-6503	AATGGTCCCCCAGGGAGGTCTGCGTTCTAATCCCCAGAAGCTAAGGATTAGGGGGACAAGGATGCAGACCTCCCTGGGGGACCGTTA	((((((((((((((((((((((((((((..(((((..((........))..)))))..)))))))))))))))))))))))))))).	chr14 + 14008010 14008097	space	93.02	1	-69.8	yes		Primates	b		mir-6503	space	93.02	B	2		Primates	novel	AATGGTCCCCCAGGGAGGTCTGCGTTCTAATCCCCAGAAGCTAAGGATTAGGGGGACAAGGATGCAGACCTCCCTGGGGGACCGTT	chr14 + 14008010 14008097	space
mir-3162	CTGACTTTTTTGGGGAGTAGATGGGTGGGGAGCATTAACAATGTTTCTCACTCCCTACCCCTCCACTCCCCAAAAAAGTCAG	((((((((((((((((((.((.((((((((((....(((...))).....)))))))))).)).))))))))))))))))))	chr14 + 14461951 14462033	intron	96.34	0	-51.7	no		Primates	b		mir-3162	intron	96.34	A	0		Primates		CTGACTTTTTTGGGGAGTAGATGGGTGGGGAGCATTAACAATGTTTCTCACTCCCTACCCCTCCACTCCCCAAAAAAGTCAG	chr14 + 14461951 14462033	intron
mir-130a	TGCTGCTGGCCAGAGCTCTTTTCACATTGTGCTACTGTCTGCACCTGTCACTAGCAGTGCAATGTTAAAAGGGCATTGGCCGTGTAGTG	.((((((((((((.((((((((.((((((((((.(((...((....))...))).)))))))))).)))))))).))))))).))))).	chr14 - 15972409 15972498	space	100	0	-42.2	yes	mir-130	Vertebrates	a, b		mir-130a	space	100	A	1	mir-130	Vertebrata	Ref1	TGCTGCTGGCCAGAGCTCTTTTCACATTGTGCTACTGTCTGCACCTGTCACTAGCAGTGCAATGTTAAAAGGGCATTGGCCGTGTAGTG	chr14 - 15972409 15972498	space
mir-1244-1	ATCTTATTCCGAGCATTCCAGTAACTTTTTTGTGTATGTACTTAGCTATACTATAAGTAGTTGGTTTGTATGAGATGGTTAAAAA	(((((((.....(((..((((..((((....(((((.((.....)))))))...))))..))))..)))))))))).........	chr14 + 19303341 19303426	3UTR	98.82	0	-16.2	no	mir-1244	Mammals	a, b		mir-1244-1	3utr	98.82	A	0	mir-1244	Mammalia	Ref2	ATCTTATTCCGAGCATTCCAGTAACTTTTTTGTGTATGTACTTAGCTATACTATAAGTAGTTGGTTTGTATGAGATGGTTAAAAA	chr14 + 19303341 19303426	3UTR
mir-3160-1	GGACCTACCCTGGGCTTTCTAGTCTCAGCTCTCCTCCAGCTCAACTGGTCAGGAGAGCTGAGACTAGAAAGCCCAGGGCAGGTTC	((((((.((((((((((((((((((((((((((((((((.....))))..)))))))))))))))))))))))))))).))))))	chr14 + 21135888 21135973	intron	97.65	0	-72.5	yes	mir-3160	Primates	b, c		mir-3160-1	intron	97.65	A	1	mir-3160	Primates	anotation	GGACCTACCCTGGGCTTTCTAGTCTCAGCTCTCCTCCAGCTCAACTGGTCAGGAGAGCTGAGACTAGAAAGCCCAGGGCAGGTTC	chr14 + 21135888 21135973	intron
mir-3160-2	ACCTGCCCTGGGCTTTCTAGTCTCAGCTCTCCTGACCAGTTGAGCTGGAGGAGAGCTGAGACTAGAAAGCCCAGGGTAGGT	(((((((((((((((((((((((((((((((((..(((((...))))))))))))))))))))))))))))))))))))))	chr14 - 21135890 21135971	space	97.53	0	-75.1	yes	mir-3160	Primates	b, c		mir-3160-2	space	97.53	A	5?	mir-3160	Primates	anotation	ACCTGCCCTGGGCTTTCTAGTCTCAGCTCTCCTGACCAGTTGAGCTGGAGGAGAGCTGAGACTAGAAAGCCCAGGGTAGGT	chr14 - 21135890 21135971	space
mir-7154	TTCATGAACTGGGTCTAGCTTGGAGCCTTGTAGGGAAGCAAGTTGAGGAGATAGGAGGACAAGGTGTGGGGTG	(((((..(((..((((((((((...(((....)))...))))))............))))..))))))))...	chr14 + 21907627 21907700	space	94.52	0	-15.2	no		Primates	b, c		mir-7154	space	94.52	A	0		Primates	anotation	TTCATGAACTGGGTCTAGCTTGGAGCCTTGTAGGGAAGCAAGTTGAGGAGATAGGAGGACAAGGTGTGGGGT	chr14 + 21907627 21907700	space
mir-129-2	CTGCCCTTCGTGAATCTTTTTGCGGTCTGGGCTTGCTGTACATAACTCAATAGCCGGAAGCCCTTACCCCAAAAAGCATTCGCGGAGGGCGC	.(((((((((((((((((((((.(((..(((((((((((..........)))))...))))))..))).))))))).)))))))))))))).	chr14 - 23994489 23994581	space	100	0	-48.9	no	mir-129	Vertebrates	a, b		mir-129-2	space	100	A	0	mir-129	Vertebrata	Ref1	CTGCCCTTCGTGAATCTTTTTGCGGTCTGGGCTTGCTGTACATAACTCAATAGCCGGAAGCCCTTACCCCAAAAAGCATTCGCGGAGGGCGC	chr14 - 23994489 23994581	space
mir-129b	GCTTTTTGGGGTAAGGGCTTCCGGCTATTGAGTTATGTACAGCAAGCCCAGACCGCAAAAAGATT	.(((((((.(((..((((((...(((..............)))))))))..))).)))))))...	chr14 + 23994504 23994569	space	100	0	-24	no	mir-129	Vertebrates	b		mir-129b	space	100	A	0	mir-129	Vertebrata		GCTTTTTGGGGTAAGGGCTTCCGGCTATTGAGTTATGTACAGCAAGCCCAGACCGCAAAAAGATT	chr14 + 23994504 23994569	space
mir-670	GTTTAGGGGTGGACCTGATGTCCCTGAGTGTATGTGGTGAACCTGAATTTGCCTTGGGTTTCCTCATATTCATTCAGGAGTGTCAGTTGCCCCTTCAC	((..((((((((..((((((.(((((((((.((((((.((((((((.......)))))))).).))))).)))))))).)))))))))))))))..))	chr14 - 24016346 24016444	intron	100	0	-39.6	no	mir-670	Mammals	a, b		mir-670	intron	100	A	0	mir-670	Mammalia	Ref1	GTTTAGGGGTGGACCTGATGTCCCTGAGTGTATGTGGTGAACCTGAATTTGCCTTGGGTTTCCTCATATTCATTCAGGAGTGTCAGTTGCCCCTTCAC	chr14 - 24016346 24016444	intron
mir-3973	GCCCAGGATAGCTTTCTGTATTGCTTGTTACATTTTAGGATTGCTTGCCCCTTGCTCCAATGGTGCAGGCAGAAGAAATGCAAACAAAGTACAGCATTAGCCTTAGC	((..(((.(((....(((((((..(((((.((((((....((((((((((.(((...))).)).))))))))..))))))..))))))))))))..))).)))..))	chr14 - 31408730 31408837	intron	98.13	0	-27.9	no		Primates	b		mir-3973	intron	98.13	A	0		Primates		GCCCAGGATAGCTTTCTGTATTGCTTGTTACATTTTAGGATTGCTTGCCCCTTGCTCCAATGGTGCAGGCAGAAGAAATGCAAACAAAGTACAGCATTAGCCTTAGC	chr14 - 31408730 31408837	intron
mir-7975	GAGCAAAGAGCAGGAGGACAGGAGATTGATCTCCCAAGGGAGGTCCCCTGATCCGAGTCACGGCACCA	..((...((...(((...((((.(...(((((((....)))))))))))).)))...))...))....	chr14 + 33764920 33764988	space	94.12	1	-21.7	no		Primates	b		mir-7975	space	94.12	B	0		Primates		GAGCAAAGAGCAGGAGGACAGGAGATTGATCTCCCAAGGGAGGTCCCCTGATCCGAGTCACGGCACCA	chr14 + 33764920 33764988	space
mir-1902	GTTTATTTTGAGAGTGTTTGCTGTATAATTGGACTTAATAAAATGTTTAGAGGTACAGTAGGCATGACTTTGGGTAGATAA	((((((((.(((.(((((((((((((...(((((..........)))))...)))))))))))))..))).))))))))..	chr14 - 34090222 34090303	3UTR	95	1	-25.2	no	mir-1902	Mammals	b		mir-1902	3UTR	95	B	0	mir-1902	Mammalia		GTTTATTTTGAGAGTGTTTGCTGTATAATTGGACTTAATAAAATGTTTAGAGGTACAGTAGGCATGACTTTGGGTAGATAA	chr14 - 34090222 34090303	3UTR
mir-8068	GGCTAACTCATGTTTGTTGTAAGGACAGTTGTGGCAATACAGTTATCCTTACAACAAATAACTTGCCA	(((.......(((((((((((((((.(((((((....))))))).)))))))))))))))....))).	chr14 + 38984357 38984425	space	94.12	2	-26.3	no		Primates	b, c		mir-8068	space	94.12	C	0		Primates	anotation	GGCTAACTCATGTTTGTTGTAAGGACAGTTGTGGCAATACAGTTATCCTTACAACAAATAACTTGCCA	chr14 + 38984357 38984425	space
mir-610	TCTATTTGTCTTAGGTGAGCTAAATGTGTGCTAGGACACATTTGAGCCAAATGTCCCAGCACACATTTAGCTCACATAAGAAAAATGAACTCTAGT	..(((((.(((((.((((((((((((((((((.(((((..((((...))))))))).)))))))))))))))))).))))).))))).........	chr14 - 39431218 39431314	space	97.92	1	-46.2	yes	mir-610	Primates	b, c		mir-610	space	97.92	B	6	mir-610	Primates	anotation	TCTATTTGTCTTAGGTGAGCTAAATGTGTGCTAGGACACATTTGAGCCAAATGTCCCAGCACACATTTAGCTCACATAAGAAAAATGAACTCTAGT	chr14 - 39431218 39431314	space
mir-8054	TGGCAATGCAGAAAGTACAGATCGGATAGGTTCAATAGATTGCTTTAGCTGAAGCAAGCCTTCCCATTTTACATATCTCATTGTCT	.(((((((.(((..(((.((((.(((.((((........(((((((....)))))))))))))).)))))))...)))))))))).	chr14 + 44182084 44182170	space	95.35	1	-24	no		Primates	b, c		mir-8054	space	95.35	B	0		Primates	anotation	TGGCAATGCAGAAAGTACAGATCGGATAGGTTCAATAGATTGCTTTAGCTGAAGCAAGCCTTCCCATTTTACATATCTCATTGTCT	chr14 + 44182084 44182170	space
mir-4486	GCATGCTGGGCAAGGCTGGCATCTAGCACAGGCGGTAGATGCTTGCTCTTGCCATCGCAATGA	.(((((..((((((((.((((((((.(......).)))))))).)).))))))...)).))).	chr14 - 48063490 48063553	intron	96.83	1	-29.7	no		Primates	b, c		mir-4486	intron	96.83	B	0		Primates	anotation	GCATGCTGGGCAAGGCTGGCATCTAGCACAGGCGGTAGATGCTTGCTCTTGCCATCGCAATGA	chr14 - 48063490 48063553	intron
mir-6124	GGGGAGGTAGGGAAAAGGAAGGGGGAGGAGAAGGTGAGACCAGTGTCCTGGGTGCTACTCCTGCCCAGTGCCTCCCTTCCTCGTT	...((((.(((((...((...(((.(((((.((......((((....))))...)).))))).)))....))))))).))))...	chr14 - 55591473 55591558	intron	97.65	0	-37.3	no		Primates	b, c		mir-6124	intron	97.65	A	0		Primates	anotation	GGGGAGGTAGGGAAAAGGAAGGGGGAGGAGAAGGTGAGACCAGTGTCCTGGGTGCTACTCCTGCCCAGTGCCTCCCTTCCTCGTT	chr14 - 55591473 55591558	intron
mir-703	TAAAACCTTCAGAAGGAAAGGAGAATGTTTTGTGGAACACTTTGGTTTTCTTTTTTGCGTGTGGCAGTTTTA	((((((((.((...((((((((((((.....(((...)))....))))))))))))...)).))..))))))	chr14 + 60496597 60496669	3UTR	98.44	0	-14.7	no	mir-703	Vertebrates	b		mir-703	3UTR	98.44	A	0	mir-703	Vertebrata		TAAAACCTTCAGAAGGAAAGGAGAATGTTTTGTGGAACACTTTGGTTTTCTTTTTTGCGTGTGGCAGTTTTA	chr14 + 60496597 60496669	3UTR
mir-302e	TTGAGTAAGTGCTTCCATGCTTCAGTTTCCTTACTGGTAAGATGGATGTAGTAATAGCACCTACCTTACAGA	....(((.((((((((((...(((((......)))))....))))).........))))).)))........	chr14 - 60680246 60680318	space	97.22	0	-17.1	no	mir-302	Vertebrates	b		mir-302e	space	97.22	A	0	mir-302	Vertebrata		TTGAGTAAGTGCTTCCATGCTTCAGTTTCCTTACTGGTAAGATGGATGTAGTAATAGCACCTACCTTACAGA	chr14 - 60680246 60680318	space
mir-4687	ACCTGAGGAGCCAGCCCTCCTCCCGCACTCAAACTTGGAGCACTTGACCTTTGGCTGTTGGAGGGGGCAGGCCTGCGGGT	(((((.((.(((.((((.(((((.(((.(((((..(.((....)).)..))))).))).))))))))).))))).)))))	chr14 - 66769816 66769896	5UTR	96.25	0	-36.9	no		Primates	b, c		mir-4687	5utr	96.25	A	0		Primates	anotation	ACCTGAGGAGCCAGCCCTCCTCCCGCACTCAAACTTGGAGCACTTGACCTTTGGCTGTTGGAGGGGGCAGGCCTGCGGGT	chr14 - 66769816 66769896	5UTR
mir-3165	CCGGTGGCAAGGTGGATGCAATGTGACCTCAACACTTGGTCCTCTGAGGTCACATTGTATCCACGTTACCACTGG	(((((((.((.((((((((((((((((((((.............)))))))))))))))))))).)).)))))))	chr14 - 67205638 67205713	intron	97.33	0	-48.8	no	mir-3165	Primates	b, c		mir-3165	intron	97.33	A	0	mir-3165	Primates	anotation	CCGGTGGCAAGGTGGATGCAATGTGACCTCAACACTTGGTCCTCTGAGGTCACATTGTATCCACGTTACCACTGG	chr14 - 67205638 67205713	intron
mir-139	CGGGACTGGCTCAGGTGTATTCTACAGTGCACGTGTCTCCAGTGTGGCTCGGAGGCTGGAGACGCGGCCCTGTTGGAGTAACAACTGAAGCCGGAGTCTGCGAAGGGTGGGC	.....(((((((((.((((((((((((.((.((((((((((((.(.......).)))))))))))))).))).)))))).))).))).)))))).((((((.....))))))	chr14 - 67794883 67794995	intron	100	0	-56	yes	mir-139	Vertebrates	a, b		mir-139	intron	100	A	1	mir-139	Vertebrata	Ref1	CGGGACTGGCTCAGGTGTATTCTACAGTGCACGTGTCTCCAGTGTGGCTCGGAGGCTGGAGACGCGGCCCTGTTGGAGTAACAACTGAAGCCGGAGTCTGCGAAGGGTGGGC	chr14 - 67794883 67794995	intron
mir-4692	GTTTTACCTGATACCCACACTGCCTGGGTGGGACACTCAGGCAGTGTGGGTCTCAGATAAAAC	((((((.((((.((((((((((((((((((...)))))))))))))))))).)))).))))))	chr14 + 67967875 67967938	space	96.83	1	-44.7	no		Primates	b, c		mir-4692	space	96.83	B	0		Primates	anotation	GTTTTACCTGATACCCACACTGCCTGGGTGGGACACTCAGGCAGTGTGGGTCTCAGATAAAAC	chr14 + 67967875 67967938	space
mir-548al	GGTCGGTGCAAAAATAACTGCGGTTTTTGCCATTAAAAATAATAGCATTAAAAGTAATGGCAAAAACGGCAATGACTTTTGTACCAACCTAATAGCT	(((.(((((((((.....(((.(((((((((((((....((((...))))....))))))))))))).))).....))))))))).)))........	chr14 + 69688660 69688757	space	93.81	0	-36.8	no	mir-548	Primates	b		mir-548al	space	93.81	A	0	mir-548	Primates		GGTCGGTGCAAAAATAACTGCGGTTTTTGCCATTAAAAATAATAGCATTAAAAGTAATGGCAAAAACGGCAATGACTTTTGTACCAACCTAATAGCT	chr14 + 69688660 69688757	space
mir-4696	CAAAGCCACTGCAAGACGGATACTGTCATCTATTCCGGAAGATGACAATGTCCATTTTGCAGTGGCTTTG	((((((((((((((((.(((((.((((((((........)))))))).))))).))))))))))))))))	chr14 - 70008851 70008921	intron	98.57	0	-43.9	no		Primates	b, c		mir-4696	intron	98.57	A	0		Primates	anotation	CAAAGCCACTGCAAGACGGATACTGTCATCTATTCCGGAAGATGACAATGTCCATTTTGCAGTGGCTTTG	chr14 - 70008851 70008921	intron
mir-326	CTCATCTGTCTGTTGGGCTGGAGGCAGGGCCTTTGTGAAGGCGGGTGGTGCTCAGATCGCCTCTGGGCCCTTCCTCCAGCCCCGAGGCGGATTCA	...((((((((...((((((((((.(((((((......((((((.((.....))..))))))..))))))).))))))))))..))))))))...	chr14 - 70625367 70625462	intron	100	0	-54.7	yes	mir-326	Mammals	b, c		mir-326	intron	100	A	1	mir-326	Mammalia	anotation	CTCATCTGTCTGTTGGGCTGGAGGCAGGGCCTTTGTGAAGGCGGGTGGTGCTCAGATCGCCTCTGGGCCCTTCCTCCAGCCCCGAGGCGGATTCA	chr14 - 70625367 70625462	intron
mir-708	GGTAACTGCCCTCAAGGAGCTTACAATCTAGCTGGGGGTAAATGACTTGCACATGAACACAACTAGACTGTGAGCTTCTAGAGGGCAGGGACC	(((..((((((((.(((((((((((.(((((.((...((..(((.......)))..)).)).))))).))))))))))).))))))))..)))	chr14 - 74793700 74793793	intron	100	0	-46.3	yes	mir-708	Mammals	a, b		mir-708	intron	100	A	1	mir-708	Mammalia	Ref1 Ref2	GGTAACTGCCCTCAAGGAGCTTACAATCTAGCTGGGGGTAAATGACTTGCACATGAACACAACTAGACTGTGAGCTTCTAGAGGGCAGGGACC	chr14 - 74793700 74793793	intron
mir-6755	TGTTTTAGGGTAGACACTGACAACGTTATGTGTGGTCTTTAACCTGTTGTCATGTTTTTTTCCTTAG	.....(((((.(((((.((((((((........(((.....))))))))))))))))....))))).	chr14 + 81851496 81851563	intron	98.48	0	-14.9	no		Primates	b		mir-6755	intron	98.48	A	0		Primates		TGTTTTAGGGTAGACACTGACAACGTTATGTGTGGTCTTTAACCTGTTGTCATGTTTTTTTCCTTAG	chr14 + 81851496 81851563	intron
mir-1304	TAATCCCTTGAGCCCAGTGGTTCGAGGCTACAATGAGATGTGATCCTGCCACATCTCACTGTAGCCTCAAACCCTTGGGCTCAAGCGATTCAGCAAGAATCACACGATTTTC	.((((.(((((((((((.((((.(((((((((.(((((((((.......))))))))).))))))))).)))).))))))))))).)))).....((((((....)))))).	chr14 - 89611337 89611449	intron	99.11	0	-61.6	yes	mir-1304	Primates	a, b		mir-1304	intron	99.11	A	1	mir-1304	Primates	Ref1	TAATCCCTTGAGCCCAGTGGTTCGAGGCTACAATGAGATGTGATCCTGCCACATCTCACTGTAGCCTCAAACCCTTGGGCTCAAGCGATTCAGCAAGAATCACACGATTTTC	chr14 - 89611337 89611449	intron
mir-7650	GCAAAAAATAAATCCTCTTTTGCAACCCAGAACTCATTGTTCAGTATGAGTTTTGATACATATAAGAAGGGATATTATGAT	.......((((((((.(((((......((((((((((........)))))))))).........))))))))).))))...	chr14 - 89612741 89612822	intron	93.22	2	-18	no		Mammals	b		mir-7650	intron	93.22	C	0		Mammalia	snoRNA	AATCCTCTTTTGCAACCCAGAACTCATTGTTCAGTATGAGTTTTGATACATATAAGAAGGG	chr14 - 89612751 89612812	intron
mir-548l	TATTAGGTTGGTGCAAAAGTATTTGCGGGTTTTGTCATTGAAAGTAATGGCAAAAACTGCAATTACTTCTGCACCAACCTAATGC	(((((((((((((((.(((((.((((((..((((((((((....))))))))))..)))))).))))).))))))))))))))).	chr14 - 90314609 90314694	intron	95.29	0	-49	yes	mir-548	Primates	b		mir-548l	intron	95.29	A	2	mir-548	Primates	novel	TATTAGGTTGGTGCAAAAGTATTTGCGGGTTTTGTCATTGAAAGTAATGGCAAAAACTGCAATTACTTCTGCACCAACCTAATGC	chr14 - 90314609 90314694	intron
mir-1260b	GTGGCTGCTGCTCTCCGTTTATCCCACCACTGCCACCATTATTGCTACTGTTCAGCAGGTGCTGCTGGTGGTGATGGTGATAGTCTGGTGGGGGCGGTGGGGCTGCTG	......((.(((((((((...(((((((((((.((((((((((((.......((((((...)))))))))))))))))).))))..))))))))))).))))).))..	chr14 + 92220826 92220934	space	100	0	-50.5	yes	mir-1260a	Mammals	a, b		mir-1260b	space	100	A	1	mir-1260a	Mammalia	Ref1	GTGGCTGCTGCTCTCCGTTTATCCCACCACTGCCACCATTATTGCTACTGTTCAGCAGGTGCTGCTGGTGGTGATGGTGATAGTCTGGTGGGGGCGGTGGGGCTGCTG	chr14 + 92220826 92220934	space
mir-3920	ACTGAGTGAAGGGGTCAGAGAGTTAAGAGAATTAGTACAGGTGAGATTGTACTGATTCTTTTAACTCTCTGACACCCTCGCTCAGT	(((((((((.((((((((((((((((((((((((((((((......))))))))))))))))))))))))))).))))))))))))	chr14 - 97454581 97454667	intron	93.02	2	-61	no		Primates	b		mir-3920	intron	93.02	C	0		Primates		ACTGAGTGAAGGGGTCAGAGAGTTAAGAGAATTAGTACAGGTGAGATTGTACTGATTCTTTTAACTCTCTGACACCCTCGCTCAGT	chr14 - 97454581 97454667	intron
mir-2985-1	GTGGGTGGAATAGTATAACAATATAACATGTGTTGTTATAGTATTCCACCTTCCCT	(.((((((((((.((((((((((((...)))))))))))).)))))))))).)...	chr14 + 101967882 101967938	intron	100	0	-28.2	no	mir-2985	Vertebrates	b, c		mir-2985-1	intron	100	A	0	mir-2985	Vertebrata	anotation	GTGGGTGGAATAGTATAACAATATAACATGTGTTGTTATAGTATTCCACCTTCCCT	chr14 + 101967882 101967938	intron
mir-4491	ACATTCGGTCATACCAGTCCACATTAACATGGACCAGACAATATTAATGTGGACTGGTGTGACCAAAT	......(((((((((((((((((((((..((.......))...)))))))))))))))))))))....	chr14 + 107314122 107314190	space	94.12	0	-36.7	no		Primates	b, c		mir-4491	space	94.12	A	0		Primates	anotation	ACATTCGGTCATACCAGTCCACATTAACATGGACCAGACAATATTAATGTGGACTGGTGTGACCAAAT	chr14 + 107314122 107314190	space
mir-34b	GTGCTCGGTTTGTAGGCAGTGTCATTAGCTGATTGTACTGTGGTGGTTACAATCACTAACTCCACTGCCATCAAAACAAGGCAC	(((((..((((...(((((((...((((.((((((((((.....)).))))))))))))...)))))))....))))..)))))	chr14 + 107474425 107474509	space	100	0	-32.8	no	mir-34	Vertebrates	a, b		mir-34b	space	100	A	0	mir-34	Vertebrata	Ref1	GTGCTCGGTTTGTAGGCAGTGTCATTAGCTGATTGTACTGTGGTGGTTACAATCACTAACTCCACTGCCATCAAAACAAGGCAC	chr14 + 107474425 107474509	space
mir-34c	AGTCTAGTTACCAGGCAGTGTAGTTAGCTGATTGCTGATAGTACCAATCACTAACCACACGGCCAGGTAAAAAGATT	.((((..(((((.(((.((((.(((((.((((((.((....)).))))))))))).)))).))).)))))..)))).	chr14 + 107474928 107475005	space	100	0	-30.2	no	mir-34	Vertebrates	a, b		mir-34c	space	100	A	0	mir-34	Vertebrata	Ref1	AGTCTAGTTACCAGGCAGTGTAGTTAGCTGATTGCTGATAGTACCAATCACTAACCACACGGCCAGGTAAAAAGATT	chr14 + 107474928 107475005	space
mir-4301	ACCAGCCACCTCCCACTACTTCACTTGTGAACATTGCATTCATGGAGGGTGGCAGGTGCAGCTCGG	.((((((((((.(((((.(((((...(((.......)))...)))))))))).)))))..))).))	chr14 - 109450977 109451043	intron	96.97	0	-23.7	no		Primates	b, c		mir-4301	intron	96.97	A	0		Primates	anotation	ACCAGCCACCTCCCACTACTTCACTTGTGAACATTGCATTCATGGAGGGTGGCAGGTGCAGCTCGG	chr14 - 109450977 109451043	intron
mir-6756	ACCCTAGGGTGGGGTTGGAGGTGGGACTGAGGCTGAGTCTTCCTCCCCTTCCTCCCTGCCCAG	......((((((((..(((((.((((..(((((...)))))..))))))))).))))))))..	chr14 - 115356584 115356647	intron	96.83	0	-33.9	no		Primates	b, c		mir-6756	intron	96.83	A	0		Primates	anotation	ACCCTAGGGTGGGGTTGGAGGTGGGACTGAGGCTGAGTCTTCCTCCCCTTCCTCCCTGCCCAG	chr14 - 115356584 115356647	intron
mir-9818	GAAACAACCTGGCCAATGAATCATCAGGCTCCTCAATAGCATTCAAATGATTGTTGGCCAGGACGAGGG	.......((((((((((.((((((...(((.......)))......)))))))))))))))).......	chr14 - 117119033 117119102	space	94.2	1	-23.2	no		Mammals	b, c		mir-9818	space	94.2	B	0		Mammalia	anotation	GAAACAACCTGGCCAATGAATCATCAGGCTCCTCAATAGCATTCAAATGATTGTTGGCCAGGACGAGGG	chr14 - 117119033 117119102	space
mir-125b-1	TGTTGCGCTCCTCTCAGTCCCTGAGACCCTAACTTGTGATGTTTACCGTTTAAATCCACGGGTTAGGCTCTTGGGAGCTGCGAGTCGTGCTTTTGCA	....((((..(((.((((.(((((((.(((((((((((..(((((.....))))).))))))))))).))))))).)))).)))..)))).......	chr14 - 118125299 118125396	space	100	0	-41.1	yes	mir-10	Vertebrates	a, b		mir-125b-1	space	100	A	1	mir-10	Vertebrata	Ref1	TGTTGCGCTCCTCTCAGTCCCTGAGACCCTAACTTGTGATGTTTACCGTTTAAATCCACGGGTTAGGCTCTTGGGAGCTGCGAGTCGTGCTTTTGCA	chr14 - 118125299 118125396	space
mir-3596a	GTTGTTTAGTGCAAGACCCAAGGAAAGCTAGGAGGCTGTACAGTTATCTCCCTTGATGTAATTCTAAACTATACAACCTACTACCTCAGCCTGGGAGCATGCAGTCACAATGGC	(((((..(.((((...((((.((..((.(((.(((.((((.(((((((......)))).........))).)))).))).))).))...))))))....)))).).)))))...	chr14 + 118172222 118172336	space	93.86	0	-25.7	no	let-7	Mammals	b, c		mir-3596a	space	93.86	A	0	let-7	Mammalia	anotation	GTTGTTTAGTGCAAGACCCAAGGAAAGCTAGGAGGCTGTACAGTTATCTCCCTTGATGTAATTCTAAACTATACAACCTACTACCTCAGCCTGGGAGCATGCAGTCACAATGGC	chr14 + 118172222 118172336	space
let-7a-2	AGGCTGAGGTAGTAGGTTGTATAGTTTAGAATTACATCAAGGGAGATAACTGTACAGCCTCCTAGCTTTCCT	(((..(((.(((.(((((((((((((.........(((......)))))))))))))))).))).))).)))	chr14 - 118172242 118172314	space	100	0	-25.2	yes	let-7	Vertebrates	a, b		let-7a-2	space	100	A	5	let-7	Vertebrata	Ref1	AGGCTGAGGTAGTAGGTTGTATAGTTTAGAATTACATCAAGGGAGATAACTGTACAGCCTCCTAGCTTTCCT	chr14 - 118172242 118172314	space
mir-10526	TCCCCTTAGTTTCCTTTAAGAGCGATAAAAATGGAAAAGGGGGCTGAGGTGGAG	(((((((((((((((((..................)))))))))))))).))).	chr14 - 118177802 118177856	space	98.15	0	-20.9	no		Primates	b, c		mir-10526	space	98.15	A	0		Primates	anotation	TCCCCTTAGTTTCCTTTAAGAGCGATAAAAATGGAAAAGGGGGCTGAGGTGGAG	chr14 - 118177802 118177856	space
mir-100	CCTGTTGCCACAAACCCGTAGATCCGAACTTGTGGTATTAGTCCGCACAAGCTTGTGTCTATAGGTATGTGTCTTTTAGG	((((....((((.(((.((((((.(((.((((((...........)))))).))).)))))).))).)))).....))))	chr14 - 118177927 118178007	space	100	0	-26	yes	mir-10	Vertebrates	a, b		mir-100	space	100	A	1	mir-10	Vertebrata	Ref1	CCTGTTGCCACAAACCCGTAGATCCGAACTTGTGGTATTAGTCCGCACAAGCTTGTGTCTATAGGTATGTGTCTTTTAGG	chr14 - 118177927 118178007	space
mir-3167	CAGTATTTCTGAAATTCTATTTTCTGAAGTTCTTCAGGAAGGATTTCAGAAATACTGGT	((((((((((((((((((...(((((((....)))))))))))))))))))))))))..	chr14 - 122814415 122814474	intron	100	0	-29.7	no	mir-3167	Primates	a, b		mir-3167	intron	100	A	0	mir-3167	Primates	Ref1	CAGTATTTCTGAAATTCTATTTTCTGAAGTTCTTCAGGAAGGATTTCAGAAATACTGGT	chr14 - 122814415 122814474	intron
mir-6090	CGCTGGGTCCGCGCGCCCCGGGCCCGGCGATGTCCGCTGGGGGGAGCGAGGGGCGGGGCG	((((..((((.(.((((((...(((((((.....)))))))))).))).)))))..))))	chr14 + 124313838 124313898	space	95	0	-33.4	no		Primates	b, c		mir-6090	space	95	A	0		Primates	anotation	CGCTGGGTCCGCGCGCCCCGGGCCCGGCGATGTCCGCTGGGGGGAGCGAGGGGCGGGGCG	chr14 + 124313838 124313898	space
mir-1232	GTGGGGTGGCGGCGACATGGCGGGGGCGGCGGGCCCTGCGGAGGCTGTGCGCCTGACCCCGACCACCCCGCAG	((((((((((((......((((((.(((.(((.(((...)).).)))))).)))).))))).)))))))))..	chr15 + 1288259 1288332	intron	100	0	-42.6	no		Cercopithecidae	a, b		mir-1232	intron	100	A	0		Cercopithecidae	Ref1	GTGGGGTGGCGGCGACATGGCGGGGGCGGCGGGCCCTGCGGAGGCTGTGCGCCTGACCCCGACCACCCCGCAG	chr15 + 1288259 1288332	intron
mir-126	CGCTGGTGATGGGACATTATTACTTTTGGTACGCGCTGTGACACTTCAAACTCGTACCGTGAGTAATAATGCGCTGTCCACAGCA	.((((..(((((..(((((((((((.(((((((.....(((....)))....))))))).)))))))))))..)))))..)))).	chr15 - 1660720 1660805	intron	100	0	-36.8	yes	mir-126	Vertebrates	a, b		mir-126	intron	100	A	1	mir-126	Vertebrata	Ref1 Ref2	CGCTGGTGATGGGACATTATTACTTTTGGTACGCGCTGTGACACTTCAAACTCGTACCGTGAGTAATAATGCGCTGTCCACAGCA	chr15 - 1660720 1660805	intron
mir-126b	ATTATTACTCACGGTACGAGTTTGAAGTGTCACAGCGCGTACCAAAAGTAATAATGTC	(((((((((...((((((.((((((....))).))).))))))...)))))))))...	chr15 + 1660735 1660793	intron	98.28	0	-19.3	no	mir-126	Vertebrates	b, c		mir-126b	intron	98.28	A	0	mir-126	Vertebrata	anotation	ATTATTACTCACGGTACGAGTTTGAAGTGTCACAGCGCGTACCAAAAGTAATAATGTC	chr15 + 1660735 1660793	intron
mir-4674	CCCAGGCGCCCGCTCCCGACCCACGCCGCGCCGCCGGGTCCCTCCTCCCCGGAGAGGCTGGGCTCGGGACGCGCGGCTCAGCTCGGG	(((.(((((((((((((((((((.(((.(.(((..(((........)))))).).))))))).)))))).))).)))...))).)))	chr15 + 1794775 1794862	intron	100	0	-49.6	no		Primates	b, c		mir-4674	intron	100	A	0		Primates	anotation	CCCAGGCGCCCGCTCCCGACCCACGCCGCGCCGCCGGGTCCCTCCTCCCCGGAGAGGCTGGGCTCGGGACGCGCGGCTCAGCTCGGG	chr15 + 1794775 1794862	intron
mir-7975	GAGCAAAGAGCAGGAGGACAGGGGATTGATCTCCCAAGGGAGGTCCCCTGATCCGAGTCACGGCACCA	..((...((...(((...((((((((....((((....)))))))))))).)))...))...))....	chr15 - 7526437 7526505	space	95.59	1	-26.4	no		Primates	b		mir-7975	space	95.59	B	0		Primates		GAGCAAAGAGCAGGAGGACAGGGGATTGATCTCCCAAGGGAGGTCCCCTGATCCGAGTCACGGCACCA	chr15 - 7526437 7526505	space
mir-219a-2	ACTCAGGGGCTTCGCCACTGATTGTCCAAACGCAATTCTTGTACGAGTCTGCGGCCAACCGAGAATTGTGGCTGGACATCTGTGGCTGAGCTCCGGG	.(((.(((((((.(((((.(((.(((((..(((((((((((...(.(((...))))...)))))))))))..)))))))).))))).))))))))))	chr15 + 10801003 10801100	space	100	0	-49.8	yes	mir-219	Vertebrates	a, b		mir-219a-2	space	100	A	5	mir-219	Vertebrata	Ref1	ACTCAGGGGCTTCGCCACTGATTGTCCAAACGCAATTCTTGTACGAGTCTGCGGCCAACCGAGAATTGTGGCTGGACATCTGTGGCTGAGCTCCGGG	chr15 + 10801003 10801100	space
mir-219b	GGAGCTCAGCCACAGATGTCCAGCCACAATTCTCGGTTGGCCGCAGACTCGTACAAGAATTGCGTTTGGACAATCAGTGGCGAAGCCC	((.(((..(((((.(((((((((.(.((((((((((((.......))).))....))))))).).)))))).))).)))))..)))))	chr15 - 10801009 10801097	space	100	0	-35.1	yes	mir-219	Vertebrates	b, c		mir-219b	space	100	A	1	mir-219	Vertebrata	anotation	GGAGCTCAGCCACAGATGTCCAGCCACAATTCTCGGTTGGCCGCAGACTCGTACAAGAATTGCGTTTGGACAATCAGTGGCGAAGCCC	chr15 - 10801009 10801097	space
mir-3154	GGCCGGCCCCCTCCTCAGGCCCCTCCTTCTCAGCCCCAGCTCCCGCTCACCCCTGCCACGTCAAAGGAGGCAGAAGGGGAGTTGGGAGCAGAGAGGGGACCACGGGCTGGCT	(((((((((........((((((((..(((..((((((((((((.((.....(((((.(......)..))))).)))))))))))).))))))))))).))..)))))))))	chr15 + 10960721 10960833	intron	100	0	-60.8	no	mir-3154	Mammals	a, b		mir-3154	intron	100	A	0	mir-3154	Mammalia	Ref1	GGCCGGCCCCCTCCTCAGGCCCCTCCTTCTCAGCCCCAGCTCCCGCTCACCCCTGCCACGTCAAAGGAGGCAGAAGGGGAGTTGGGAGCAGAGAGGGGACCACGGGCTGGCT	chr15 + 10960721 10960833	intron
mir-199b	CCAGAGGACACCTCCACTCCGTCTACCCAGTGTTTAGACTATCTGTTCAGGACTCCCAAATTGTACAGTAGTCTGCACATTGGTTAGGCTGGGCTGGGTTAGACCCTCGG	((.((((.....(((((((.(((((.(((((((.(((((((.((((.(((..........))).))))))))))).))))))).))))).))).))))......))))))	chr15 + 10960938 10961048	space	100	0	-42.1	yes	mir-199	Vertebrates	b, c		mir-199b	space	100	A	1	mir-199	Vertebrata	anotation	CCAGAGGACACCTCCACTCCGTCTACCCAGTGTTTAGACTATCTGTTCAGGACTCCCAAATTGTACAGTAGTCTGCACATTGGTTAGGCTGGGCTGGGTTAGACCCTCGG	chr15 + 10960938 10961048	space
mir-3604-2	CAGCCTAACCAATGTGCAGACTACTGTACAATTTGGGAGTCCTGAACAGATAGTCTAAACACTGGGTAGACGG	....(((.(((.(((..((((((((((.((....((....)))).)))).))))))..))).))).)))....	chr15 - 10960956 10961029	intron	100	0	-20.7	no	mir-3604	Mammals	a, b		mir-3604-2	intron	100	A	0	mir-3604	Mammalia	Ref2	CAGCCTAACCAATGTGCAGACTACTGTACAATTTGGGAGTCCTGAACAGATAGTCTAAACACTGGGTAGACGG	chr15 - 10960956 10961029	intron
mir-181b-2	CTGATGGCTGCACTCAACATTCATTGCTGTCGGTGGGTTTGAGTCTGAATCAACTCACTGATCGATGAATGCAAACTGCGGACCAAACA	....((((((((.....(((((((((..(((((((((((.((.......)))))))))))))))))))))).....))))).)))....	chr15 - 11398154 11398243	intron	100	0	-34.4	yes	mir-181	Vertebrates	a, b		mir-181b-2	intron	100	A	1	mir-181	Vertebrata	Ref1	CTGATGGCTGCACTCAACATTCATTGCTGTCGGTGGGTTTGAGTCTGAATCAACTCACTGATCGATGAATGCAAACTGCGGACCAAACA	chr15 - 11398154 11398243	intron
mir-181a-2	AGAAGGGCTATCAGGCCAGCCTTCAGAGGACTCCAAGGAACATTCAACGCTGTCGGTGAGTTTGGGATTTGAAAAAACCACTGACCGTTGACTGTACCTCGGGGTCCTTA	.((((((((....)))...))))).(((((((((.(((.(((.((((((..(((((((.((((...........))))))))))))))))).))).))).))))))))).	chr15 - 11399379 11399489	intron	100	0	-49.5	yes	mir-181	Vertebrates	a, b		mir-181a-2	intron	100	A	1	mir-181	Vertebrata	Ref1	AGAAGGGCTATCAGGCCAGCCTTCAGAGGACTCCAAGGAACATTCAACGCTGTCGGTGAGTTTGGGATTTGAAAAAACCACTGACCGTTGACTGTACCTCGGGGTCCTTA	chr15 - 11399379 11399489	intron
mir-601	TGCATGAGTTCATCTTGGTCTAGGATTGTTGGAGGAGTCAGAAAAATTACCCCAGGGATCCTGAAGTCATTGGGGTGGA	........(((((((((((.(((((((.((((.(((((.......))).)))))).))))))).....)))))))))))	chr15 + 12641970 12642049	intron	100	0	-21.4	no	mir-601	Primates	a, b		mir-601	intron	100	A	0	mir-601	Primates	Ref1	TGCATGAGTTCATCTTGGTCTAGGATTGTTGGAGGAGTCAGAAAAATTACCCCAGGGATCCTGAAGTCATTGGGGTGGA	chr15 + 12641970 12642049	intron
mir-600	AAGTCACTTACTGTGTCTCTAGCTTCACAGGAAGGCTCTTGTCTGTCAGGCAGTGGAGTTACAGACAAGAGCCTTGCTCAGGCCAGCCCTGCCC	.((.(((.....))).))((.((((...((.(((((((((((((((..(((......)))))))))))))))))).)).)))).))........	chr15 + 12929061 12929155	intron	98.94	0	-36.5	no	mir-600	Primates	a		mir-600	intron	98.94	A	0	mir-600	Primates	Ref1 Ref2	AAGTCACTTACTGTGTCTCTAGCTTCACAGGAAGGCTCTTGTCTGTCAGGCAGTGGAGTTACAGACAAGAGCCTTGCTCAGGCCAGCCCTGCCC	chr15 + 12929061 12929155	intron
mir-147a	AATCTAAAGAAAACATTTCTGCACACACACCAGACTATTGAAGCCAGTGTGTGGAAATGCTTCTGCTACATT	.......((((..(((((((((((((....................))))))))))))).))))........	chr15 + 17083843 17083915	space	100	0	-17.6	no	mir-147	Vertebrates	a		mir-147a	space	100	A	0	mir-147	Vertebrata	Ref1	AATCTAAAGAAAACATTTCTGCACACACACCAGACTATTGAAGCCAGTGTGTGGAAATGCTTCTGCTACATT	chr15 + 17083843 17083915	space
mir-455	TCCCTGGCGTGAGGGTATGTGCCTTTGGACTACATCGTGGAAGCCAGCACCATGCAGTCCATGGGCATATACACTTGCCTCAAGGCCTATGTCATC	.....(((.(((((((((((((((.((((((.(((.(((........))).))).)))))).)))))))))).....)))))..))).........	chr15 - 23371473 23371569	intron	100	0	-42.1	yes	mir-455	Vertebrates	a, b		mir-455	intron	100	A	1	mir-455	Vertebrata	Ref1	TCCCTGGCGTGAGGGTATGTGCCTTTGGACTACATCGTGGAAGCCAGCACCATGCAGTCCATGGGCATATACACTTGCCTCAAGGCCTATGTCATC	chr15 - 23371473 23371569	intron
mir-7702	CTTAGACTGCCAGGCTCCCTGAGAACATGCAGTTTCAGGGAGTCTGGCAGTCTAAGTGT	((((((((((((((((((((((((........))))))))))))))))))))))))...	chr15 + 26384523 26384582	space	94.92	1	-45.1	no		Primates	b		mir-7702	space	94.92	B	0		Primates		CTTAGACTGCCAGGCTCCCTGAGAACATGCAGTTTCAGGGAGTCTGGCAGTCTAAGTGT	chr15 + 26384523 26384582	space
mir-3927	GGCCCTAGGACTTGGTTTTGCCAGTGTGCCAATGCCTATCAAATATCTACCTGTCATGTTTGTCATAGGACAGGTAGATATTTGATAGGCATTGGCACGTTGGGGTCGGCC	((((((((.(((.(((...))))))(((((((((((((((((((((((((((((((((.....)))..)))))))))))))))))))))))))))))).))))))))....	chr15 - 28167966 28168077	space	100	0	-68.5	no	mir-3927	Primates	a, b		mir-3927	space	100	A	0	mir-3927	Primates	Ref1	GGCCCTAGGACTTGGTTTTGCCAGTGTGCCAATGCCTATCAAATATCTACCTGTCATGTTTGTCATAGGACAGGTAGATATTTGATAGGCATTGGCACGTTGGGGTCGGCC	chr15 - 28167966 28168077	space
mir-3927b	TGCCAATGCCTATCAAATATCTACCTGTCCTATGACAAACATGACAGGTAGATATTTGATAGGCATTGGCA	(((((((((((((((((((((((((((((..(((.....))))))))))))))))))))))))))))))))	chr15 + 28167980 28168051	space	95.77	0	-50.9	no	mir-3927	Primates	b		mir-3927b	space	95.77	A	0	mir-3927	Primates		TGCCAATGCCTATCAAATATCTACCTGTCCTATGACAAACATGACAGGTAGATATTTGATAGGCATTGGCA	chr15 + 28167980 28168051	space
mir-32	GCTTGCTCTGGTGGAGATATTGCACATTACTAAGTTGCATGTTGTCACGGCCTCAATGCAATTTAGTGTGTGTGATATTTTCACATGAGTGCATGC	((..((((..(((((((((((((((((.(((((((((((((..((....))..).)))))))))))))))))))))))))))))..))))))....	chr15 + 28647834 28647930	intron	100	0	-43.6	yes	mir-32	Vertebrates	a, b		mir-32	intron	100	A	1	mir-32	Vertebrata	Ref1	GCTTGCTCTGGTGGAGATATTGCACATTACTAAGTTGCATGTTGTCACGGCCTCAATGCAATTTAGTGTGTGTGATATTTTCACATGAGTGCATGC	chr15 + 28647834 28647930	intron
mir-8081	TTATTGTCTTTATTTTCTGAGTCGTGCCTCTATGGCCCCCCTCCTCTCTGAAAGCAAGGCCACTTGAGTCGTGCCTTTCTGAATGAAGTCAATGT	.(((((.((((((((...(((.((((.(((..(((((....................)))))...))).)))).)))...)))))))).))))).	chr15 - 31083194 31083289	space	98.95	0	-23.5	no		Primates	b, c		mir-8081	space	98.95	A	0		Primates	anotation	TTATTGTCTTTATTTTCTGAGTCGTGCCTCTATGGCCCCCCTCCTCTCTGAAAGCAAGGCCACTTGAGTCGTGCCTTTCTGAATGAAGTCAATGT	chr15 - 31083194 31083289	space
mir-7975	GAGCAAAGAGCAGGAGGACAGGGGATTGATCTCCCAAGGGAGGTCCCCTGATCCGAGTTACGGCACCA	..((....(((....(((((((((((....((((....)))))))))))).)))..)))...))....	chr15 + 33057326 33057394	intron	94.12	2	-26.4	no		Primates	b		mir-7975	intron	94.12	C	0		Primates		GAGCAAAGAGCAGGAGGACAGGGGATTGATCTCCCAAGGGAGGTCCCCTGATCCGAGTTACGGCACCA	chr15 + 33057326 33057394	intron
mir-9949	GCTGCCCCCGGCCTTCCAGCTGCTGCTGCGCGCGTGTGACCAGGGCGACACGGAGACCGCGCGGCGGCTGCTGGAGCCGGGGGCAGC	((((((((((((..((((((.((((((((((((((((..(....)..))))).....))))))))))).))))))))))))))))))	chr15 + 38973529 38973616	CDS	94.25	2	-68.3	no		Primates	b		mir-9949	CDS	94.25	C	0		Primates		GCTGCCCCCGGCCTTCCAGCTGCTGCTGCGCGCGTGTGACCAGGGCGACACGGAGACCGCGCGGCGGCTGCTGGAGCCGGGGGCAGC	chr15 + 38973529 38973616	cds
mir-548aq	AAAAGTAATTGCGGTTTTTGCCATTACTTTCCGTGGCAAAAACCGCAATTACTTTTGC	((((((((((((((((((((((((........))))))))))))))))))))))))..	chr15 + 39058680 39058738	space	93.1	1	-35.3	no	mir-548	Primates	a		mir-548aq	space	93.1	B	0	mir-548	Primates	Ref2	AAAAGTAATTGCGGTTTTTGCCATTACTTTCCGTGGCAAAAACCGCAATTACTTTTGC	chr15 + 39058680 39058738	space
mir-6854	AAAGCAAGCTCAGGTTTGAGAACTGCTGATGTCATCCATCATAACTTCTGTGTTTCTCCTCTTGAGCAG	.......(((((((...(((((.((((((((.....)))))........))).)))))..)))))))..	chr15 + 39547272 39547341	intron	95.65	0	-17.8	no		Primates	b		mir-6854	intron	95.65	A	0		Primates		AAAGCAAGCTCAGGTTTGAGAACTGCTGATGTCATCCATCATAACTTCTGTGTTTCTCCTCTTGAGCAG	chr15 + 39547272 39547341	intron
mir-1302-8	CCCATTTAAATTTGAATTTCATATAAACAGAGTAATTTTCAGTATTAGTGTATCACGTGCAGCATTTGGGACATACTTATGCTAAAAAAATTAGGTGGTGTTGATCTGAAATTCCAGTGTAGATGGGCA	((((((((.(((.((((((((.((.((((...(((((((.(((((.(((((.(((.(((...))).)))...))))).)))))...))))))).....)))).)).)))))))).))).))))))))..	chr15 + 40410249 40410378	space	96.88	0	-32.7	no	mir-1302	Mammals	b		mir-1302-8	space	96.88	A	0	mir-1302	Mammalia		CCCATTTAAATTTGAATTTCATATAAACAGAGTAATTTTCAGTATTAGTGTATCACGTGCAGCATTTGGGACATACTTATGCTAAAAAAATTAGGTGGTGTTGATCTGAAATTCCAGTGTAGATGGGCA	chr15 + 40410249 40410378	space
mir-4476	AAAAGCCTGTCCCTAAGTCCCACCCAGCCTCCCAGAGTTGGTGCCAGGAAGGACTTAGGGACAGGCTTTG	.(((((((((((((((((((..((..((...(((....))).))..))..))))))))))))))))))).	chr15 + 42113704 42113774	intron	95.71	1	-43.2	no		Primates	b, c		mir-4476	intron	95.71	B	0		Primates	anotation	AAAAGCCTGTCCCTAAGTCCCACCCAGCCTCCCAGAGTTGGTGCCAGGAAGGACTTAGGGACAGGCTTTG	chr15 + 42113704 42113774	intron
mir-6853	GGGAAAGCGTGGGATGTCCATGAGGTCAGGGGATGGTGATAGGTCAAGGCCTGTTCACTGGAACCCTGCGCAGG	.......(((((.....))))).(..(((((..(((((((((((....))))).))))))...)))))..)...	chr15 - 43377844 43377918	intron	94.59	1	-26.6	no		Primates	b, c		mir-6853	intron	94.59	B	0		Primates	anotation	GGGAAAGCGTGGGATGTCCATGAGGTCAGGGGATGGTGATAGGTCAAGGCCTGTTCACTGGAACCCTGCGCAG	chr15 - 43377844 43377918	intron
mir-6852	TGCTGCCCTGGGGTTCTGAGAACACGCTGTGACTCCCCTGATGTCCTCTGTTCCTCAGGTGCTGGG	....(((((((((..(.(((.(((((............)).))).))).)..))))))).))....	chr15 + 43400433 43400499	intron	95.45	0	-19.5	no		Primates	b, c		mir-6852	intron	95.45	A	0		Primates	anotation	TGCTGCCCTGGGGTTCTGAGAACACGCTGTGACTCCCCTGATGTCCTCTGTTCCTCAGGTGCTGGG	chr15 + 43400433 43400499	intron
mir-4667	CCCTAGAGGTTGAGGTTCTGACTGGGGAGCAGAAGGAGAACCCAAGAAAAGCTGACTTGGAGATTCCTCCTTCTGTCCCCACAGGACTTTGGCCTGGATGTGCCTGCCTTCC	......((((((((((((((..((((((.(((((((((((((((((.........))))).).)).)))))))))))))))))))))))))))))(((.((....))..)))	chr15 - 43505234 43505346	intron	98.21	0	-50.1	yes	mir-4667	Mammals	a, b		mir-4667	intron	98.21	A	1	mir-4667	Mammalia	Ref1	CCCTAGAGGTTGAGGTTCTGACTGGGGAGCAGAAGGAGAACCCAAGAAAAGCTGACTTGGAGATTCCTCCTTCTGTCCCCACAGGACTTTGGCCTGGATGTGCCTGCCTTCC	chr15 - 43505234 43505346	intron
mir-6851	CAGGGAGGAGGTGGTACTAGGGACCAGCAACCTGATTACTCCTCTTTGGCCCTCTGTACCCCTCCAG	......(((((.(((((.((((.((((..................))))))))..))))))))))..	chr15 + 45389969 45390036	intron	95.52	1	-26.3	no		Primates	b, c		mir-6851	intron	95.52	B	0		Primates	anotation	CAGGGAGGAGGTGGTACTAGGGACCAGCAACCTGATTACTCCTCTTTGGCCCTCTGTACCCCTCCAG	chr15 + 45389969 45390036	intron
mir-622	AGTACTGGTCTCAGCAGATTGAGGAGAGCACCACAGTGGTCACTACTCAATCTGCTGAGGTTGGAGCT	(((.(((((((((((((((((((..((.(((....))).))....))))))))))))))))))).)))	chr15 - 48007346 48007414	intron	94.12	1	-33.6	no	mir-622	Primates	b		mir-622	intron	94.12	B	0	mir-622	Primates		AGTACTGGTCTCAGCAGATTGAGGAGAGCACCACAGTGGTCACTACTCAATCTGCTGAGGTTGGAGCT	chr15 - 48007346 48007414	intron
mir-873	GAATAAGTTTGTGTGCATTTGCAGGAACTTGTGAGTCTCCTATTGAAAATGAACAGGAGACTGATGAGTTCCCGGGAACACCCACAAATCTTCCTACTCATTTCTACTGC	(((...(((((((.(..(((.(.(((((((((.((((((((.((.......)).)))))))).))))))))).).)))..).))))))).))).................	chr15 + 49896262 49896372	intron	100	0	-36	no	mir-873	Mammals	a, b		mir-873	intron	100	A	0	mir-873	Mammalia	Ref1	GAATAAGTTTGTGTGCATTTGCAGGAACTTGTGAGTCTCCTATTGAAAATGAACAGGAGACTGATGAGTTCCCGGGAACACCCACAAATCTTCCTACTCATTTCTACTGC	chr15 + 49896262 49896372	intron
mir-873b	TTGTGGGTGTTCCCGGGAACTCATCAGTCTCCTGTTCATTTTCAATAGGAGACTCACAAGTTCCTGCAAATGCACAC	..(((.(((((..((((((((....(((((((((((.......)))))))))))....))))))))..))))).)))	chr15 - 49896272 49896349	space	94.81	0	-31.6	no	mir-873	Mammals	b, c		mir-873b	space	94.81	A	0	mir-873	Mammalia	anotation	TTGTGGGTGTTCCCGGGAACTCATCAGTCTCCTGTTCATTTTCAATAGGAGACTCACAAGTTCCTGCAAATGCACAC	chr15 - 49896272 49896349	space
mir-876	CTGTGAAGTGCTGTGGATTTCTTTGTGAATCACCATATCTAAGCTAATGTGGTGGTGGTTTACAAAGTAATTCATAGTGCTTCACAG	(((((((((((((((((((.((((((((((((((((..(.........)..)))))))))))))))).)))))))))))))))))))	chr15 + 49917108 49917195	intron	100	0	-48.5	no	mir-876	Mammals	a, b		mir-876	intron	100	A	0	mir-876	Mammalia	Ref1	CTGTGAAGTGCTGTGGATTTCTTTGTGAATCACCATATCTAAGCTAATGTGGTGGTGGTTTACAAAGTAATTCATAGTGCTTCACAG	chr15 + 49917108 49917195	intron
mir-548i-2	AGGCTGGTGGAAAAGTAATTGCTGTTTTTGCCATTAAAAATAATGGCAAAACTGCAATTACTTTTGCACCAATCTA	(((.(((((.((((((((((((.(((((.(((((((....)))))))))))).)))))))))))).))))).))).	chr15 + 53399674 53399750	space	93.15	1	-39.3	no	mir-548	Primates	b		mir-548i-2	space	93.15	B	0	mir-548	Primates		AGGCTGGTGGAAAAGTAATTGCTGTTTTTGCCATTAAAAATAATGGCAAAACTGCAATTACTTTTGCACCAATCT	chr15 + 53399674 53399750	space
mir-31b	TGGCCATGGCTGCTGTCAGACAGGAAAGATGGCAATATGTTGGCATAGCAGGTTCCCAGTTCAACAGCTATGCCAGCATCTTGCCTCCTCTCCAGTTCCAAGTTACAGGAGAATACTAT	...((.((...(((....(((.(((.((..(((((.(((((((((((((..(((........))).))))))))))))).)))))..)).))).)))...)))..))))..........	chr15 - 57236419 57236538	space	95.76	0	-42.4	no	mir-31	Vertebrates	b, c		mir-31b	space	95.76	A	0	mir-31	Vertebrata	anotation	TGGCCATGGCTGCTGTCAGACAGGAAAGATGGCAATATGTTGGCATAGCAGGTTCCCAGTTCAACAGCTATGCCAGCATCTTGCCTCCTCTCCAGTTCCAAGTTACAGGAGAATACTA	chr15 - 57236419 57236538	space
mir-31	TTGGAACTGGAGAGGAGGCAAGATGCTGGCATAGCTGTTGAACTGGGAACCTGCTATGCCAACATATTGCCATCTTTCCTGTCTGA	(((((.(.(((((((.(((((.(((.(((((((((.(((........)))..))))))))).))).))))).))))))).))))))	chr15 + 57236437 57236523	space	100	0	-39.8	yes	mir-31	Vertebrates	a, b		mir-31	space	100	A	1	mir-31	Vertebrata	Ref1	TTGGAACTGGAGAGGAGGCAAGATGCTGGCATAGCTGTTGAACTGGGAACCTGCTATGCCAACATATTGCCATCTTTCCTGTCTGA	chr15 + 57236437 57236523	space
mir-491	GGAATTGACTTAGCTGGGTAGTGGGGAACCCTTCCATGAGGAGTAGAACACTCCTTATGCAAGATTCCCTTCTACCTGGCTGGGTTGGAGTC	......(((((((((((((((.((((((..(((.((((((((((.....)))))))))).))).)))))).)))))))))))))))......	chr15 - 58034214 58034306	intron	100	0	-48	yes	mir-491	Mammals	a, b		mir-491	intron	100	A	1	mir-491	Mammalia	Ref1	GGAATTGACTTAGCTGGGTAGTGGGGAACCCTTCCATGAGGAGTAGAACACTCCTTATGCAAGATTCCCTTCTACCTGGCTGGGTTGGAGTC	chr15 - 58034214 58034306	intron
mir-4474	CTACCTACCTTATTAGTCTCATGATCAGACACAAATATGGCTCTTTGTGGCTGGTCATGAGGCTAACAAGGTAGGCAC	...((((((((.((((((((((((((((.((((((........)))))).)))))))))))))))).))))))))...	chr15 + 58257396 58257474	intron	96.15	0	-44.5	no		Primates	b, c		mir-4474	intron	96.15	A	0		Primates	anotation	CTACCTACCTTATTAGTCTCATGATCAGACACAAATATGGCTCTTTGTGGCTGGTCATGAGGCTAACAAGGTAGGCAC	chr15 + 58257396 58257474	intron
mir-4473	AAGGAACAGGGGACACTTGTAATGGAGAGCACTAAGCTATGGACTGCTATGGACTGCTGGTGCTCTCCATTACAAGTATCCCCTGTAACCT	.(((.((((((((.((((((((((((((((((((((((((((....)))))).))..)))))))))))))))))))).))))))))..)))	chr15 + 58350059 58350150	intron	95.6	2	-57.9	no		Primates	b, c		mir-4473	intron	95.6	C	0		Primates	anotation	AAGGAACAGGGGACACTTGTAATGGAGAGCACTAAGCTATGGACTGCTATGGACTGCTGGTGCTCTCCATTACAAGTATCCCCTGTAACCT	chr15 + 58350059 58350150	intron
mir-3152	GTGCAGAGTTATTGTCTCTGTTCTAACACAAGACGAGGCTTCCCTGTGTTAGAATACGGCAATAACTCTGCACT	((((((((((((((((..((((((((((((.(..........).)))))))))))).)))))))))))))))).	chr15 - 60184508 60184582	intron	94.59	1	-39.5	no		Primates	b		mir-3152	intron	94.59	B	0		Primates		GTGCAGAGTTATTGTCTCTGTTCTAACACAAGACGAGGCTTCCCTGTGTTAGAATACGGCAATAACTCTGCAC	chr15 - 60184508 60184582	intron
mir-4665	CTCGAGGTGCTGGGGGACGCGTGAGCGCGAGCCGCTTCCTCACGGCTCGGCCGCGGCGCGTAGCCCCTGCCACATCGGG	(((((.((((.((((.((((((..((((((((((........)))))))..))).))))))..)))).).))).)))))	chr15 - 73003921 73004000	space	98.73	0	-44.3	no		Primates	b, c		mir-4665	space	98.73	A	0		Primates	anotation	CTCGAGGTGCTGGGGGACGCGTGAGCGCGAGCCGCTTCCTCACGGCTCGGCCGCGGCGCGTAGCCCCTGCCACATCGGG	chr15 - 73003921 73004000	space
mir-101-2	GACTGAACTGTCCTTTTTCGGTTATCATGGTACCGATGCTGTATATCTGAAAGGTACAGTACTGTGATAACTGAAGAATGGTGGTGCCATC	(((......)))..(((((((((((((((((((.(.((((............))))).)))))))))))))))))))(((((...))))).	chr15 - 74252694 74252785	intron	100	0	-31.2	yes	mir-101	Vertebrates	a, b		mir-101-2	intron	100	A	1	mir-101	Vertebrata	Ref1	GACTGAACTGTCCTTTTTCGGTTATCATGGTACCGATGCTGTATATCTGAAAGGTACAGTACTGTGATAACTGAAGAATGGTGGTGCCATC	chr15 - 74252694 74252785	intron
mir-204	GGCTACAGTCTTTCTTCATGTGACTCGTGGACTTCCCTTTGTCATCCTATGCCTGAGAATATATGAAGGAGGCTGGGAAGGCAAAGGGACGTTCAATTGTCATCACTGGC	.....((((..........(((((...(((((.((((((((((.(((((.((((...............))))))))).)))))))))).)))))...))))).))))..	chr15 - 81544829 81544939	intron	100	0	-42	yes	mir-204	Vertebrates	a, b		mir-204	intron	100	A	1	mir-204	Vertebrata	Ref1	GGCTACAGTCTTTCTTCATGTGACTCGTGGACTTCCCTTTGTCATCCTATGCCTGAGAATATATGAAGGAGGCTGGGAAGGCAAAGGGACGTTCAATTGTCATCACTGGC	chr15 - 81544829 81544939	intron
mir-548c-1	AGATTGGTGCAAAAGTAATTGTGGTTTTGTCATTACTTTCAATGGCAAAAACCACAATTACTTTTGCACCAACCTA	((.(((((((((((((((((((((((((((((((......)))))).))))))))))))))))))))))))).)).	chr15 + 90131766 90131842	space	93.42	1	-44.3	no	mir-548	Primates	b		mir-548c-1	space	93.42	B	0	mir-548	Primates		AGATTGGTGCAAAAGTAATTGTGGTTTTGTCATTACTTTCAATGGCAAAAACCACAATTACTTTTGCACCAACCT	chr15 + 90131766 90131842	space
mir-7-1	TTGGATGTTGGCCTAGTTCTGTGTGGAAGACTAGTGATTTTGTTGTTTTTAGATAACTAAATTGACAACAAATCACAGTCTGCCATATGGCACAGGCCATGCCTCTACAG	.((((.((((((((.((.((((((((.(((((.(((((((.(((((((((((....)))))..)))))))))))))))))).)))))))).)))))))).)).))))...	chr15 - 94780601 94780711	intron	100	0	-47.7	yes	mir-7	Vertebrates	a, b		mir-7-1	intron	100	A	1	mir-7	Vertebrata	Ref1 Ref2	TTGGATGTTGGCCTAGTTCTGTGTGGAAGACTAGTGATTTTGTTGTTTTTAGATAACTAAATTGACAACAAATCACAGTCTGCCATATGGCACAGGCCATGCCTCTACAG	chr15 - 94780601 94780711	intron
mir-4672	GGCTGCTTCTCGCCTCTTTCCAGCTGTGTGGCCTTGGGCAAGCCTCTTGGTCACACAGCTGGAAAGAGGCATGAAACAGCC	(((((.(((..((((((((((((((((((((((..(((.....)))..))))))))))))))))))))))..))).)))))	chr15 + 100883816 100883897	intron	93.83	2	-59.7	no	mir-4672	Primates	b		mir-4672	intron	93.83	C	0	mir-4672	Primates		GGCTGCTTCTCGCCTCTTTCCAGCTGTGTGGCCTTGGGCAAGCCTCTTGGTCACACAGCTGGAAAGAGGCATGAAACAGCC	chr15 + 100883816 100883897	intron
mir-2861	CGGCGGCGGAGGCGCCTCTGCAGCTCCGGCTCCCCCTGGCCTCTCGGGAACTACAAGTCCCAGGGGGCCTGGCGGCGGGCGGCGGGCGGAAGAGGCGGGGTCGGCGCC	.((((.(((...(((((((...(((((.((((((((.(((((((.((((........)))).))))))).)).)).)))).).))))...)))))))...))).))))	chr15 - 100978499 100978607	space	99.07	1	-68	no	mir-2861	Mammals	b, c		mir-2861	space	99.07	B	0	mir-2861	Mammalia	anotation	CGGCGGCGGAGGCGCCTCTGCAGCTCCGGCTCCCCCTGGCCTCTCGGGAACTACAAGTCCCAGGGGGCCTGGCGGCGGGCGGCGGGCGGAAGAGGCGGGGTCGGCGCC	chr15 - 100978499 100978607	space
mir-3911	GGGTGAGGATGTGCGTGGATCCTGGAGGAGGCAGAGAAGACAGTGAGCTTGCCAGTTCTGGTTTCTAACACTTTTCCTTTCCTGCGCCTCTTGACTGCCAGATCTGCACCC	(((((.((((.((.((((.((..(((((..((((.((((..((((.....((((....))))......))))....)))).)))).))))).)))))))).)))).)))))	chr15 + 101083131 101083242	space	94.5	1	-42.5	no		Primates	b, c		mir-3911	space	94.5	B	0		Primates	anotation	GGGTGAGGATGTGCGTGGATCCTGGAGGAGGCAGAGAAGACAGTGAGCTTGCCAGTTCTGGTTTCTAACACTTTTCCTTTCCTGCGCCTCTTGACTGCCAGATCTGCACCC	chr15 + 101083131 101083242	space
mir-3651	GATTCGATGGGCCATAGCAATCCTGTGATTTATGCATGGAGGCTGCTTCTCCTCAGCAGCCGCCATAGCCCGGTCACTGGTACATGGTTC	........(((((((.(....((.((((((...((((((.(((((((.......))))))).)))).))..)))))).))..))))))))	chr15 - 106465111 106465201	intron	96.67	1	-33.7	no		Primates	b, c		mir-3651	intron	96.67	B	0		Primates	anotation	GATTCGATGGGCCATAGCAATCCTGTGATTTATGCATGGAGGCTGCTTCTCCTCAGCAGCCGCCATAGCCCGGTCACTGGTACATGGTTC	chr15 - 106465111 106465201	intron
mir-4670	CTCTAGGAAGCGACCATGATGTAGCTTCACAGACTCTCCAAAAGTCTGTGAAATTACATCATGGTCGCTTCCTAGAG	((((((((((((((((((((((((.((((((((((.......)))))))))).))))))))))))))))))))))))	chr15 - 106709463 106709540	intron	97.33	1	-58.2	no		Primates	b, c		mir-4670	intron	97.33	B	0		Primates	anotation	CTCTAGGAAGCGACCATGATGTAGCTTCACAGACTCTCCAAAAGTCTGTGAAATTACATCATGGTCGCTTCCTAGAG	chr15 - 106709463 106709540	intron
let-7a-1	CACTGTGGGATGAGGTAGTAGGTTGTATAGTTTTAGGGTCACACCCACCACTGGGAGATAACTATACAATCTACTGTCTTTCCTAACGTGAT	(((..(((((.(((((((((((((((((((((.....(((...((((....)))).)))))))))))))))))))))))))))))..)))..	chr15 + 108223782 108223874	space	100	0	-38	yes	let-7	Vertebrates	a, b		let-7a-1	space	100	A	1	let-7	Vertebrata	Ref1	CACTGTGGGATGAGGTAGTAGGTTGTATAGTTTTAGGGTCACACCCACCACTGGGAGATAACTATACAATCTACTGTCTTTCCTAACGTGAT	chr15 + 108223782 108223874	space
let-7f-1	AAAAGATTGCTCTATCAGAGTGAGGTAGTAGATTGTATAGTTGTGGGGTAGTGATTTTACCCTGTTCAGGAGATAACTATACAATCTATTGCCTTCCCTGAGGAGTAGAC	.......((((((.((((.(.((((((((((((((((((((((((((((((.....))))))).........))))))))))))))))))))))).)))))))))))...	chr15 + 108224163 108224273	space	100	0	-50.2	yes	let-7	Vertebrates	a, b		let-7f-1	space	100	A	1	let-7	Vertebrata	Ref1	AAAAGATTGCTCTATCAGAGTGAGGTAGTAGATTGTATAGTTGTGGGGTAGTGATTTTACCCTGTTCAGGAGATAACTATACAATCTATTGCCTTCCCTGAGGAGTAGAC	chr15 + 108224163 108224273	space
mir-3596d	ACTCCTCAGGGAAGGCAATAGATTGTATAGTTATCTCCTGAACAGGGTAAAATCACTACCCCACAACTATACAATCTACTACCTCACTCTGATAGAG	.(((.((((((.(((...((((((((((((((.((....))...(((((.......)))))...))))))))))))))...)))..))))))..)))	chr15 - 108224172 108224269	space	98.97	0	-31.4	no	let-7	Mammals	b, c		mir-3596d	space	98.97	A	0	let-7	Mammalia	anotation	ACTCCTCAGGGAAGGCAATAGATTGTATAGTTATCTCCTGAACAGGGTAAAATCACTACCCCACAACTATACAATCTACTACCTCACTCTGATAGAG	chr15 - 108224172 108224269	space
let-7d	AATGGGTTCCTAGGAAGAGGTAGTAGGTTGCATAGTTTTAGGGCAGGGATTTTGCCCACAAGGAGGTAACTATACGACCTGCTGCCTTTCTTAGGGCCTTATTAT	((((((.((((((((.((((((((((((((.((((((...((((((.....))))))..........)))))).)))))))))))))))))))))).))))))..	chr15 + 108226644 108226749	space	100	0	-48.8	yes	let-7	Vertebrates	a, b		let-7d	space	100	A	1	let-7	Vertebrata	Ref1 Ref2	AATGGGTTCCTAGGAAGAGGTAGTAGGTTGCATAGTTTTAGGGCAGGGATTTTGCCCACAAGGAGGTAACTATACGACCTGCTGCCTTTCTTAGGGCCTTATTAT	chr15 + 108226644 108226749	space
mir-3596b	GGCCCTAAGAAAGGCAGCAGGTCGTATAGTTACCTCCTTGTGGGCAAAATCCCTGCCCTAAAACTATGCAACCTACTACCTCTTCCTAGGAACCC	((.((((.((((((.((.((((.((((((((......(((.(((((.......)))))))))))))))).)))).)).))).))).))))..)).	chr15 - 108226647 108226742	space	96.84	0	-31.7	no	let-7	Mammals	b, c		mir-3596b	space	96.84	A	0	let-7	Mammalia	anotation	GGCCCTAAGAAAGGCAGCAGGTCGTATAGTTACCTCCTTGTGGGCAAAATCCCTGCCCTAAAACTATGCAACCTACTACCTCTTCCTAGGAACCC	chr15 - 108226647 108226742	space
mir-23b	GGGCGGCGCTGCTCTCAGGTGCTCTGGCTGCTTGGGTTCCTGGCATGCTGATTTGTGACTTAAGATTAAAATCACATTGCCAGGGATTACCACGCAACCACGACCTTG	(((((....)))))..((((....(((.(((.(((((((((((((((.((((((..............)))))))).))))))))))..))).))).)))..))))..	chr15 + 109228189 109228297	intron	100	0	-39.5	yes	mir-23	Vertebrates	a, b		mir-23b	intron	100	A	1	mir-23	Vertebrata	Ref1	GGGCGGCGCTGCTCTCAGGTGCTCTGGCTGCTTGGGTTCCTGGCATGCTGATTTGTGACTTAAGATTAAAATCACATTGCCAGGGATTACCACGCAACCACGACCTTG	chr15 + 109228189 109228297	intron
mir-27b	CCCAGCGATGACCTCTCTAACAAGGTGCAGAGCTTAGCTGATTGGTGAACAGTGATTGGTTTCCGCTTTGTTCACAGTGGCTAAGTTCTGCACCTGAAGAGAAGGTGA	..........((((((((....(((((((((((((((((.((((.(((((((....(((...)))..))))))))))))))))))))))))))))..)))).))))..	chr15 + 109228429 109228537	intron	100	0	-49.9	yes	mir-27	Vertebrates	a, b		mir-27b	intron	100	A	1	mir-27	Vertebrata	Ref1	CCCAGCGATGACCTCTCTAACAAGGTGCAGAGCTTAGCTGATTGGTGAACAGTGATTGGTTTCCGCTTTGTTCACAGTGGCTAAGTTCTGCACCTGAAGAGAAGGTGA	chr15 + 109228429 109228537	intron
mir-3074	GGGCTCGACTCCTGTTCCTGCTGAACTGAGCCAGTGTGTAAAATGAGAACTGATATCAGCTCAGTAGGCACCGGAGGGCGGGTCC	(((((((.((((.((.((((((((.((((..((((.............))))...)))).)))))))).)).))))..)))))))	chr15 - 109229002 109229087	space	100	0	-40.3	yes	mir-3074	Mammals	b, c		mir-3074	space	100	A	1	mir-3074	Mammalia	anotation	GGGCTCGACTCCTGTTCCTGCTGAACTGAGCCAGTGTGTAAAATGAGAACTGATATCAGCTCAGTAGGCACCGGAGGGCGGGTCC	chr15 - 109229002 109229087	space
mir-24-1	GACCCGCCCTCCGGTGCCTACTGAGCTGATATCAGTTCTCATTTTACACACTGGCTCAGTTCAGCAGGAACAGGAGTCGA	....((..((((.((.(((.(((((((((..(((((.............))))).))))))))).))).)).)))).)).	chr15 + 109229003 109229083	intron	100	0	-27.9	yes	mir-24	Vertebrates	a, b		mir-24-1	intron	100	A	1	mir-24	Vertebrata	Ref1 Ref2	GACCCGCCCTCCGGTGCCTACTGAGCTGATATCAGTTCTCATTTTACACACTGGCTCAGTTCAGCAGGAACAGGAGTCGA	chr15 + 109229003 109229083	intron
mir-22	CCTCACCTGGCTGAGCCGCAGTAGTTCTTCAGTGGCAAGCTTTATGTCCTGACCCAGCTAAAGCTGCCAGTTGAAGAACTGTTGCCCTCTGCCCCTGGCTT	.....((.(((.(((..((((((((((((((((((((.((((((.((.........))))))))))))).))))))))))))))).))).)))...))...	chr16 - 1601385 1601486	space	100	0	-41.9	yes	mir-22	Vertebrates	a, b		mir-22	space	100	A	1	mir-22	Vertebrata	Ref1 Ref2	CCTCACCTGGCTGAGCCGCAGTAGTTCTTCAGTGGCAAGCTTTATGTCCTGACCCAGCTAAAGCTGCCAGTTGAAGAACTGTTGCCCTCTGCCCCTGGCTT	chr16 - 1601385 1601486	space
mir-3600	CAGAGGGCAACAGTTCTTCAACTGGCAGCTTTAGCTGGGTCAGGACATAAAGCTTGCCACTGAAGAACTACTGCGGCTCAG	..(((.(((..(((((((((..((((((((((((((......)).).)))))).))))).)))))))))..)))..)))..	chr16 + 1601395 1601476	space	100	0	-32.5	no		Mammals	b, c		mir-3600	space	100	A	0		Mammalia	anotation	CAGAGGGCAACAGTTCTTCAACTGGCAGCTTTAGCTGGGTCAGGACATAAAGCTTGCCACTGAAGAACTACTGCGGCTCAG	chr16 + 1601395 1601476	space
mir-132	CCGCCCCCGCGTCTCCAGGGCAACCGTGGCTTTCGATTGTTACTGTGGGAACTGGAGGTAACAGTCTACAGCCATGGTCGCCCCGCAGCACGCCCACGCGC	.(((....((((((.(.((((.(((((((((...((((((((((..(....)....))))))))))...))))))))).)))).).)).))))....))).	chr16 - 1954993 1955094	space	100	0	-46.3	yes	mir-132	Vertebrates	a, b		mir-132	space	100	A	1	mir-132	Vertebrata	Ref1	CCGCCCCCGCGTCTCCAGGGCAACCGTGGCTTTCGATTGTTACTGTGGGAACTGGAGGTAACAGTCTACAGCCATGGTCGCCCCGCAGCACGCCCACGCGC	chr16 - 1954993 1955094	space
mir-212	CGGGGCACCCCGCCCGGACAGCGCGCCGGCACCTTGGCTCTAGACTGCTTACTGCCCGGGCCGCCCTCAGTAACAGTCTCCAGTCAGGGCCACCGACGCCTGGCCCCGCC	((((((...((....)).(((.(((.(((..((((((((..((((((.((((((...(((...))).))))))))))))..))))))))...))).))))))))))))..	chr16 - 1955353 1955463	space	100	0	-53.8	yes	mir-132	Vertebrates	a, b		mir-212	space	100	A	1	mir-132	Vertebrata	Ref1	CGGGGCACCCCGCCCGGACAGCGCGCCGGCACCTTGGCTCTAGACTGCTTACTGCCCGGGCCGCCCTCAGTAACAGTCTCCAGTCAGGGCCACCGACGCCTGGCCCCGCC	chr16 - 1955353 1955463	space
mir-4520-1	GTGTGCCACTTGCGTGTTTTCTGTCCAAATCAGAAAAGGATTTGGACAGAAAACAGGCAGGAAGAAGGAA	........(((((.(((((((((((((((((.......))))))))))))))))).))))).........	chr16 - 6680282 6680352	space	97.14	1	-35	no	mir-4520	Primates	b, c		mir-4520-1	space	97.14	B	0	mir-4520	Primates	anotation	GTGTGCCACTTGCGTGTTTTCTGTCCAAATCAGAAAAGGATTTGGACAGAAAACAGGCAGGAAGAAGGAA	chr16 - 6680282 6680352	space
mir-4520-2	CCTGCCTGTTTTCTGTCCAAATCCTTTTCTGATTTGGACAGAAAACACGCAAGT	..(((.(((((((((((((((((.......))))))))))))))))).)))...	chr16 + 6680291 6680345	space	96.3	1	-28.5	no	mir-4520	Primates	b, c		mir-4520-2	space	96.3	B	0	mir-4520	Primates	anotation	CCTGCCTGTTTTCTGTCCAAATCCTTTTCTGATTTGGACAGAAAACACGCAAGT	chr16 + 6680291 6680345	space
mir-195	AGCTTCCCTGGCTCTAGCAGCACAGAAATATTGGCACAGGGAAGCAAGTCTGCCAATATTGGCTGTGCTGCTCCAGGCAGGGTGGTG	.(((.(((((.((..((((((((((.((((((((((..((........))))))))))))..))))))))))..)).))))).))).	chr16 - 7046633 7046720	intron	100	0	-46.3	yes	mir-15	Mammals	a, b		mir-195	intron	100	A	1	mir-15	Mammalia	Ref1	AGCTTCCCTGGCTCTAGCAGCACAGAAATATTGGCACAGGGAAGCAAGTCTGCCAATATTGGCTGTGCTGCTCCAGGCAGGGTGGTG	chr16 - 7046633 7046720	intron
mir-497	CCACCCCGGTCCTGCTCCCGCCCCAGCAGCACACTGTGGTTTGTACGGCACTGTGGCCACGTCCAAACCACACTGTGGTGTTAGAGCGAGGGTGGGGGAGGCACCGCCGAGG	...((.(((((((.((((((((((((((.((((.(((((((((.(((((......)))..)).))))))))).)))).)))).....).))))))))))))....)))).))	chr16 - 7046930 7047042	intron	100	0	-55.1	yes	mir-497	Vertebrates	a, b		mir-497	intron	100	A	1	mir-497	Vertebrata	Ref1	CCACCCCGGTCCTGCTCCCGCCCCAGCAGCACACTGTGGTTTGTACGGCACTGTGGCCACGTCCAAACCACACTGTGGTGTTAGAGCGAGGGTGGGGGAGGCACCGCCGAGG	chr16 - 7046930 7047042	intron
mir-497b	TCGGCGGTGCCTCCCCCACCCTCGCTCTAACACCACAGTGTGGTTTGGACGTGGCCACAGTGCCGTACAAACCACAGTGTGCTGCTGGGGCGGGAGCAGGACCGGGGTGGGCTGAGAGGAAGAGA	((..(...((((.((((.(((((((((((.((.((((.(((((((((.(((..((....))..))).))))))))).)))).)).)))))))))....))...)))).))))...)..)).....	chr16 + 7046932 7047057	space	95.2	0	-56.9	no	mir-497	Vertebrates	c		mir-497b	space	95.2	A	0	mir-497	Vertebrata	anotation	TCGGCGGTGCCTCCCCCACCCTCGCTCTAACACCACAGTGTGGTTTGGACGTGGCCACAGTGCCGTACAAACCACAGTGTGCTGCTGGGGCGGGAGCAGGACCGGGGTGGGCTGAGAGGAAGAGA	chr16 + 7046932 7047057	space
mir-324	CTGACTATGCCTCCCCGCATCCCCTAGGGCATTGGTGTAAAGCTGGAGACCCACTGCCCCAGGTGCTGCTGGGGGTTGTAGTC	..(((((((.(((((.(((.(.(((.(((((.(((.((..........))))).))))).))).).))).))))).)))))))	chr16 - 7280251 7280334	space	100	0	-36.8	yes	mir-324	Mammals	a, b		mir-324	space	100	A	1	mir-324	Mammalia	Ref1	CTGACTATGCCTCCCCGCATCCCCTAGGGCATTGGTGTAAAGCTGGAGACCCACTGCCCCAGGTGCTGCTGGGGGTTGTAGTC	chr16 - 7280251 7280334	space
mir-4314	GACCATTCCTCTCTGGGAAATGGGGCAGGTAGTGGCCGCAGTGAGAAAGCTGGCCTGTCCTTCTGCCCCAGGGCCCAGAGTCTGTGACAGGA	...(((....(((((((...(((((((((....((((((.........)).))))......)))))))))...)))))))...)))......	chr16 + 8208474 8208566	space	95.65	1	-42.2	no		Primates	b, c		mir-4314	space	95.65	B	0		Primates	anotation	GACCATTCCTCTCTGGGAAATGGGGCAGGTAGTGGCCGCAGTGAGAAAGCTGGCCTGTCCTTCTGCCCCAGGGCCCAGAGTCTGTGACAGGA	chr16 + 8208474 8208566	space
mir-762-1	GCCCGGCTCCGGGTCTCGGCCCGTACGGTCCGGCCGGCCATGCTGGCGGGGCTGGGGCCGGAGCCGAGCCC	....(((((.((.((.((((((...((((((.((((((...)))))).)))))))))))))).))))))).	chr16 + 12018609 12018680	intron	100	0	-50.4	no	mir-762	Vertebrates	a, b		mir-762-1	intron	100	A	0	mir-762	Vertebrata	Ref1	GCCCGGCTCCGGGTCTCGGCCCGTACGGTCCGGCCGGCCATGCTGGCGGGGCTGGGGCCGGAGCCGAGCCC	chr16 + 12018609 12018680	intron
mir-744	TTGGGCAAGGTGCGGGGCTAGGGCTAACAGCAGTCTTACTGAAGGTTTCCTGGAAACCACGCACATGCTGTTGCCACTAACCTCAACCTTACTCGGTC	(((((.(((((..((((.((((((.(((((((...........((((((...)))))).......)))))))))).))).)))).))))).)))))..	chr16 + 12269422 12269520	intron	100	0	-36.5	yes	mir-744	Mammals	b, c		mir-744	intron	100	A	1	mir-744	Mammalia	anotation	TTGGGCAAGGTGCGGGGCTAGGGCTAACAGCAGTCTTACTGAAGGTTTCCTGGAAACCACGCACATGCTGTTGCCACTAACCTCAACCTTACTCGGTC	chr16 + 12269422 12269520	intron
mir-1288	GAGGGTGTTGATCAGCAGATCAGGACTGTAACTCACCATAGTGGTGGACTGCCCTGATCTGGAGACCACTGCCTT	.((((((.((.((..(((((((((...(((..((((((...))))))..))))))))))))..)).)).))))))	chr16 - 16592646 16592721	intron	100	0	-30.1	no	mir-1288	Primates	b, c		mir-1288	intron	100	A	0	mir-1288	Primates	anotation	GAGGGTGTTGATCAGCAGATCAGGACTGTAACTCACCATAGTGGTGGACTGCCCTGATCTGGAGACCACTGCCTT	chr16 - 16592646 16592721	intron
mir-6777	TCAAGATGGGGAGTCAGGCAGTGGTGGAGAGGGACAGCCCTGAGCCTCCACTCTCCTGGCCCCCAG	......(((((.((((((.((.(((((((((((....))))....)))))))))))))))))))).	chr16 - 18135796 18135862	intron	95.45	0	-36.2	no		Primates	b, c		mir-6777	intron	95.45	A	0		Primates	anotation	TCAAGATGGGGAGTCAGGCAGTGGTGGAGAGGGACAGCCCTGAGCCTCCACTCTCCTGGCCCCCAG	chr16 - 18135796 18135862	intron
mir-33b	GCGGGCGGCCCCGCGGTGCATTGCTGTTGCATTGCACGTGTGTGAGGCGGGTGCAGTGCCTCGGCAGTGCAGCCCGGAGCCGGCCCCTGGCACCGC	((((.((((.(((.((((((((((((..(((((((((.(((.....))).)))))))))..)))))))))).))))).))))(((...))).))))	chr16 - 18136153 18136249	intron	100	0	-60.3	no	mir-33	Vertebrates	a, b		mir-33b	intron	100	A	0	mir-33	Vertebrata	Ref1	GCGGGCGGCCCCGCGGTGCATTGCTGTTGCATTGCACGTGTGTGAGGCGGGTGCAGTGCCTCGGCAGTGCAGCCCGGAGCCGGCCCCTGGCACCGC	chr16 - 18136153 18136249	intron
mir-6778	GTTCAGGTGGGAGGACAGGAGGCAGGTGTGGCTGGAGGAAGCCGCCTGAACCTGCCTCCCTGACATTCCACAG	......((((((...((((((((((((((((((......))))))....)))))))).))))...))))))..	chr16 - 18686596 18686669	intron	95.89	0	-39.4	no		Primates	b, c		mir-6778	intron	95.89	A	0		Primates	anotation	GTTCAGGTGGGAGGACAGGAGGCAGGTGTGGCTGGAGGAAGCCGCCTGAACCTGCCTCCCTGACATTCCACAG	chr16 - 18686596 18686669	intron
mir-1180	GGACCCACCCGGCCGGGAATAGTGCTCCTGGTTGTTTCCGGCTCGCGTGGGTGTGT	(.((((((.(((((((((((((..(....).))))))))))).)).)))))).)..	chr16 - 19331469 19331525	intron	100	0	-29.1	yes	mir-1180	Mammals	a, b		mir-1180	intron	100	A	1	mir-1180	Mammalia	Ref1	GGACCCACCCGGCCGGGAATAGTGCTCCTGGTTGTTTCCGGCTCGCGTGGGTGTGT	chr16 - 19331469 19331525	intron
mir-622	AGAGGAGCTGGGCAAGTACTGATCTCAGCAGATTGAGGAGAGCACTGCAGTGGTCACCACGCAGTCTGCCGAGGTTGGAGCTGCTGAGATG	.......((.((((.((.((((((((.((((((((.((.((.(((....))).)).))...)))))))).)))))))).)))))).))...	chr16 - 24479458 24479549	3UTR	93.41	1	-38.6	no	mir-622	Primates	a		mir-622	3UTR	93.41	B	0	mir-622	Primates	Ref1	AGAGGAGCTGGGCAAGTACTGATCTCAGCAGATTGAGGAGAGCACTGCAGTGGTCACCACGCAGTCTGCCGAGGTTGGAGCTGCTGAGATG	chr16 - 24479458 24479549	3UTR
mir-4723	AGTTGGTGGGGGAGGCAGCCATGAGATAAGAGCGCCTCCTAGAGAATGTTGAACTAAAGGTTCCCTCTCTGGCTCCTCCCCAAAG	........(((((((.(((((.((((....((((.(((...)))..))))(((((...)))))..))))))))))))))))....	chr16 + 24582673 24582758	intron	97.53	0	-31.3	no		Primates	b		mir-4723	intron	97.53	A	0		Primates		AGTTGGTGGGGGAGGCAGCCATGAGATAAGAGCGCCTCCTAGAGAATGTTGAACTAAAGGTTCCCTCTCTGGCTCCTCCCCAAAG	chr16 + 24582673 24582758	intron
mir-451	CTTGGGAATGGCAAGGAAACCGTTACCATTACTGAGTTTAGTAATGGTAAGGGTTCTCTTGCTATATCCAGA	.(((((.(((((((((.((((.((((((((((((....)))))))))))).)))).))))))))).))))).	chr16 - 25123023 25123095	intron	100	0	-39.5	yes	mir-451	Vertebrates	a, b		mir-451	intron	100	A	1	mir-451	Vertebrata	Ref1	CTTGGGAATGGCAAGGAAACCGTTACCATTACTGAGTTTAGTAATGGTAAGGGTTCTCTTGCTATATCCAGA	chr16 - 25123023 25123095	intron
mir-451b	TGGATATAGCAAGAGAACCCTTACCATTACTAAACTCAGTAATGGTAACGGTTTCCTTGCCATTCCCA	(((..((.(((((.(((((.(((((((((((......))))))))))).))))).))))).))..)))	chr16 + 25123025 25123093	space	97.06	1	-29.9	no	mir-451	Vertebrates	b, c		mir-451b	space	97.06	B	0	mir-451	Vertebrata	anotation	TGGATATAGCAAGAGAACCCTTACCATTACTAAACTCAGTAATGGTAACGGTTTCCTTGCCATTCCCA	chr16 + 25123025 25123093	space
mir-144	TGGGGCCCTGGCTGGGATATCATCATATACTGTAAGTTTGTGATGAGACACTACAGTATAGATGATGTACTAGTCCGGGCACCCCC	.(((((((.((((((.((((((((.(((((((((.((((......))))..))))))))))))))))).)))))).)))).)))..	chr16 - 25123187 25123273	intron	100	0	-45	yes	mir-144	Vertebrates	a, b		mir-144	intron	100	A	1	mir-144	Vertebrata	Ref1	TGGGGCCCTGGCTGGGATATCATCATATACTGTAAGTTTGTGATGAGACACTACAGTATAGATGATGTACTAGTCCGGGCACCCCC	chr16 - 25123187 25123273	intron
mir-4732	GAGGGAGCCGTAGAGCAGGGAGCAGGGAGCAGGGAGCTGTGTGTGTCCAGCCCTGACCTGTTCTGTTCTGCCCCCAGCCCCCC	..(((.((.((((((((((..(((((...((((..((((........)))))))).))))))))))))))).....)).))).	chr16 - 25123309 25123392	intron	96.05	1	-34.8	no		Vertebrates	b		mir-4732	intron	96.05	B	0		Vertebrata		GAGGGAGCCGTAGAGCAGGGAGCAGGGAGCAGGGAGCTGTGTGTGTCCAGCCCTGACCTGTTCTGTTCTGCCCCCAGCCCCCC	chr16 - 25123309 25123392	intron
mir-423	ACTTGTGAGGAAATAAAGGAAGTTAGGCTGAGGGGCAGAGAGCGAGACTTTTCTATTTTCCAAAAGCTCGGTCTGAGGCCCCTCAGTCTTGCTTCCTACCCCGCGCTTGAGTTTCTCCCC	(((((((.((......(((((((.((((((((((((..(((.((((.(((((.........))))))))).)))...)))))))))))).)))))))...)).)))..))))........	chr16 + 26441873 26441993	intron	100	0	-52.6	yes	mir-423	Mammals	a, b		mir-423	intron	100	A	1	mir-423	Mammalia	Ref1 Ref2	ACTTGTGAGGAAATAAAGGAAGTTAGGCTGAGGGGCAGAGAGCGAGACTTTTCTATTTTCCAAAAGCTCGGTCTGAGGCCCCTCAGTCTTGCTTCCTACCCCGCGCTTGAGTTTCTCCCC	chr16 + 26441873 26441993	intron
mir-3184	AAGCAAGACTGAGGGGCCTCAGACCGAGCTTTTGGAAAATAGAAAAGTCTCGCTCTCTGCCCCTCAGCCTAACTT	(((..((.(((((((((...(((.(((((((((.........))))).)))).)))..))))))))).))..)))	chr16 - 26441892 26441967	space	100	0	-30.6	no		Primates	b, c		mir-3184	space	100	A	0		Primates	anotation	AAGCAAGACTGAGGGGCCTCAGACCGAGCTTTTGGAAAATAGAAAAGTCTCGCTCTCTGCCCCTCAGCCTAACTT	chr16 - 26441892 26441967	space
mir-4733	GGTCGCTTAAATCCCAATGCTAGACCCAGTGGCGATCAAGGTCTAGCCACCGGGTCTAGCATTGGGATTTAAGCCC	....(((((((((((((((((((((((.(((((............))))).)))))))))))))))))))))))..	chr16 - 27271692 27271768	space	96.05	1	-53.1	no		Primates	b, c		mir-4733	space	96.05	B	0		Primates	anotation	GGTCGCTTAAATCCCAATGCTAGACCCAGTGGCGATCAAGGTCTAGCCACCGGGTCTAGCATTGGGATTTAAGCCC	chr16 - 27271692 27271768	space
mir-193a	GGATGGGAGCTGAGGGCTGGGTCTTTGCGGGCGAGATGAGGGTGTCGGATCAACTGGCCTACAAAGTCCCAGTCCTCGGCCCCCG	....(((.(((((((((((((.(((((.((((.((.(((..........))).)).)))).))))).))))))))))))).))).	chr16 + 27755005 27755090	space	100	0	-53	yes	mir-193	Vertebrates	a, b		mir-193a	space	100	A	1	mir-193	Vertebrata	Ref1 Ref2	GGATGGGAGCTGAGGGCTGGGTCTTTGCGGGCGAGATGAGGGTGTCGGATCAACTGGCCTACAAAGTCCCAGTCCTCGGCCCCCG	chr16 + 27755005 27755090	space
mir-365-2	AGAGTGTTCAAGGACAGCAAGAAAAATGAGGGACTTTCAGGGGCAGCTGTGTTTTCTGACTCAGTCATAATGCCCCTAAAAATCCTTATTGTTCTTGCAGTGTGCATCAGG	...........(.((((((((((.((((((((..(((.(((((((((((.(((....))).)))).....))))))).))).)))))))).)))))))..))).)......	chr16 + 27770412 27770523	space	100	0	-39.3	yes	mir-365	Vertebrates	a, b		mir-365-2	space	100	A	5	mir-365	Vertebrata	Ref1	AGAGTGTTCAAGGACAGCAAGAAAAATGAGGGACTTTCAGGGGCAGCTGTGTTTTCTGACTCAGTCATAATGCCCCTAAAAATCCTTATTGTTCTTGCAGTGTGCATCAGG	chr16 + 27770412 27770523	space
mir-632	CGCCTCCTGCCGCAGTGCCTGACGGGAGGCGGAGCGGCGAACGAGGCCGTCGGCCATTTTGTGTCTGCTTCCTGTGGGACGCGGTCGTAGCCGT	((.((.(.(((((.((.((..((((((((((((...(((((...((((...))))..))))).)))))))))))))).))))))).).)).)).	chr16 + 28737876 28737970	5UTR	100	0	-43.1	no	mir-632	Mammals	a, b		mir-632	5utr	100	A	0	mir-632	Mammalia	Ref1	CGCCTCCTGCCGCAGTGCCTGACGGGAGGCGGAGCGGCGAACGAGGCCGTCGGCCATTTTGTGTCTGCTTCCTGTGGGACGCGGTCGTAGCCGT	chr16 + 28737876 28737970	5UTR
mir-7975	GAGCAAAGAGCAGGAGGACAGGGGATTGATCTCCCAAGGGAGGTCCCCGATCCGAGTCACGGCACCAA	..((...((...(((.....((((((....((((....))))))))))..)))...))...)).....	chr16 - 29153853 29153921	intron	94.12	1	-22.6	no		Primates	b		mir-7975	intron	94.12	B	0		Primates		GAGCAAAGAGCAGGAGGACAGGGGATTGATCTCCCAAGGGAGGTCCCCGATCCGAGTCACGGCACCA	chr16 - 29153853 29153921	intron
mir-10226	GAGGGAACTTCCATGTGTCTGGGCTGGGAAACTGGAGTTCTCCACTGGGAGACATTTAGTGTATCTTTCT	(((((((((...((((.(((.((.((((.(((....))).)))))).))).))))..)))...)))))).	chr16 + 33365362 33365432	space	97.14	0	-20.9	no		Primates	b, c		mir-10226	space	97.14	A	0		Primates	anotation	GAGGGAACTTCCATGTGTCTGGGCTGGGAAACTGGAGTTCTCCACTGGGAGACATTTAGTGTATCTTTCT	chr16 + 33365362 33365432	space
mir-152	GAGGAGGCTCGGCCCGCTGTCCCCCCCGGCCCAGGTTCTGTGATACACTCCGACTCGGGCTCTGGAGCAGTCAGTGCATGACAGAACTTGGGCCCGGAAGGACCTTCTGC	.((..(((...)))..))((((..((.((((((((((((((.((.((((..((((...(((....))))))))))).)).)))))))))))))).))..)))).......	chr16 - 33369953 33370063	intron	100	0	-51.7	yes	mir-148	Vertebrates	a, b		mir-152	intron	100	A	1	mir-148	Vertebrata	Ref1	GAGGAGGCTCGGCCCGCTGTCCCCCCCGGCCCAGGTTCTGTGATACACTCCGACTCGGGCTCTGGAGCAGTCAGTGCATGACAGAACTTGGGCCCGGAAGGACCTTCTGC	chr16 - 33369953 33370063	intron
mir-148c	CGGGCCCAAGTTCTGTCATGCACTGACTGCTCCAGAGCCCGAGTCGGAGTGTATCACAGAACCTGGGCCGG	..((((((.(((((((.(((((((..((((((........))).)))))))))).))))))).))))))..	chr16 + 33369967 33370038	space	100	0	-36.7	no	mir-148	Vertebrates	b, c		mir-148c	space	100	A	0	mir-148	Vertebrata	anotation	CGGGCCCAAGTTCTGTCATGCACTGACTGCTCCAGAGCCCGAGTCGGAGTGTATCACAGAACCTGGGCCGG	chr16 + 33369967 33370038	space
mir-7167	AGGCTCGGAGCTCTAGGCCGGCCGGTGGCGGCGGCGAGGCCGGGACTCGGGCTTAGGGCCTGC	((((((.((((((.((.((((((....((....))..))))))..)).)))))).))))))..	chr16 + 33380560 33380623	5UTR	100	0	-36.3	no		Cercopithecidae	a, b		mir-7167	5utr	100	A	0		Cercopithecidae	Ref1	AGGCTCGGAGCTCTAGGCCGGCCGGTGGCGGCGGCGAGGCCGGGACTCGGGCTTAGGGCCTGC	chr16 + 33380560 33380623	5UTR
mir-1203	TCCTCCCCGGAGCCAGGACGCAGCTCAAGCCACAGCGGGGTGTTTAGCGCTCTTCAGTGGCTCCAGATTGTGGCGCTGGTGCAGG	......((...(((((..(((((((..((((((.(.(((((((...))))))).).))))))..)).)))))...)))))...))	chr16 - 33499016 33499101	intron	97.65	1	-34.5	no	mir-1203	Primates	b, c		mir-1203	intron	97.65	B	0	mir-1203	Primates	anotation	TCCTCCCCGGAGCCAGGACGCAGCTCAAGCCACAGCGGGGTGTTTAGCGCTCTTCAGTGGCTCCAGATTGTGGCGCTGGTGCAGG	chr16 - 33499016 33499101	intron
mir-10a	GATCTGTCTGTCTTCTGTATATACCCTGTAGATCCGAATTTGTGTAAGGAATTTTGTGGTCACAAATTCGTATCTAGGGGAATATGTAGTTGACATAAACACTCCGCTCG	....(((.((((..((((((((.((((.(((((.((((((((((................)))))))))).))))))))).))))))))..))))...))).........	chr16 - 33933617 33933727	intron	100	0	-34	yes	mir-10	Vertebrates	a, b		mir-10a	intron	100	A	1	mir-10	Vertebrata	Ref1	GATCTGTCTGTCTTCTGTATATACCCTGTAGATCCGAATTTGTGTAAGGAATTTTGTGGTCACAAATTCGTATCTAGGGGAATATGTAGTTGACATAAACACTCCGCTCG	chr16 - 33933617 33933727	intron
mir-196a-1	GTGAATTAGGTAGTTTCATGTTGTTGGGCCTGGGTTTCTGAACACAACAACATTAAACCACCCGATTCAC	(((((((.(((.((((.((((((((((..(.........)..).))))))))).)))).))).)))))))	chr16 - 33989290 33989360	space	100	0	-24.8	yes	mir-196	Vertebrates	a, b		mir-196a-1	space	100	A	1	mir-196	Vertebrata	Ref1	GTGAATTAGGTAGTTTCATGTTGTTGGGCCTGGGTTTCTGAACACAACAACATTAAACCACCCGATTCAC	chr16 - 33989290 33989360	space
mir-6165	CAGCAGATCAGCAGGAGGTGAGGGGAGAGGATCCACCCCGTCCTGTCCTGTCCTCTCCTGCCCTGTTCTGGCTCCAGCCCCTCCC	.(((((....((((((((.((.((((.(((((.......))))).)))).)).)))))))).)))))..(((....)))......	chr16 + 34895776 34895861	intron	96.43	0	-37.1	no		Primates	b		mir-6165	intron	96.43	A	0		Primates		CAGCAGATCAGCAGGAGGTGAGGGGAGAGGATCCACCCCGTCCTGTCCTGTCCTCTCCTGCCCTGTTCTGGCTCCAGCCCCTCCC	chr16 + 34895776 34895861	intron
mir-8059	TACAGGTGCAGGGAAACTGTAGATGAAAAGGTCTGGCACTTGAGGGGAAGCCTCAGTTCATTCTCACTTTGCTCACCTGTT	.(((((((.((.(((..((..((((((............((((((.....))))))))))))..)).))).))))))))).	chr16 + 36171850 36171931	space	93.83	1	-24.3	no		Primates	b, c		mir-8059	space	93.83	B	0		Primates	anotation	TACAGGTGCAGGGAAACTGTAGATGAAAAGGTCTGGCACTTGAGGGGAAGCCTCAGTTCATTCTCACTTTGCTCACCTGTT	chr16 + 36171850 36171931	space
mir-3614	GGTTCTGTCTTGGGTCACTTGGATCTGAAGGCTGCCCCTTTGCTCTCTGGGGTAGCCTTCAGATCTTGGTGTTTTGATTACTCGCT	..........(((((((((.((((((((((((((((((..........)))))))))))))))))).))))........)))))..	chr16 - 42380759 42380845	3UTR	94.19	0	-42.1	yes		Primates	a, b		mir-3614	3utr	94.19	A	1		Primates	Ref2	GGTTCTGTCTTGGGTCACTTGGATCTGAAGGCTGCCCCTTTGCTCTCTGGGGTAGCCTTCAGATCTTGGTGTTTTGATTACTCGCT	chr16 - 42380759 42380845	3UTR
mir-142	ACAGACAGACAGTGCAGTCACCCATAAAGTAGAAAGCACTACTAACAGCACTGGAGGGTGTAGTGTTTCCTACTTTATGGATGAGTGTACTGTGGGCTTCGGAGATCACGC	..((.(..((((((((.(((.(((((((((((.(((((((((...(..(....)..)..))))))))).))))))))))).))).))))))))..))).............	chr16 - 43850674 43850785	space	100	0	-44.6	yes	mir-142	Vertebrates	a, b		mir-142	space	100	A	1	mir-142	Vertebrata	Ref1	ACAGACAGACAGTGCAGTCACCCATAAAGTAGAAAGCACTACTAACAGCACTGGAGGGTGTAGTGTTTCCTACTTTATGGATGAGTGTACTGTGGGCTTCGGAGATCACGC	chr16 - 43850674 43850785	space
mir-142b	GCGTGATCTCCGAAGCCCACAGTACACTCATCCATAAAGTAGGAAACACTACACCCTCCAGTGCTGTTAGTAGTGCTTTCTACTTTATGGGTGACTGCACTGTCTGTCTGTCCGT	(((.(((......((...(((((.((.((((((((((((((((((.((((((.................)))))).)))))))))))))))))).)).)))))))....))))))	chr16 + 43850674 43850789	intron	96.52	0	-41.1	no	mir-142	Vertebrates	b		mir-142b	intron	96.52	A	0	mir-142	Vertebrata		GCGTGATCTCCGAAGCCCACAGTACACTCATCCATAAAGTAGGAAACACTACACCCTCCAGTGCTGTTAGTAGTGCTTTCTACTTTATGGGTGACTGCACTGTCTGTCTGTCCGT	chr16 + 43850674 43850789	intron
mir-4736	AGGCAGGTTATCTGGGCTGCCATCTCCCACTGGCTGCTTGCCTGCCT	((((((((.....((((.((((........)))).))))))))))))	chr16 - 43855441 43855488	space	100	0	-22.5	no		Primates	b, c		mir-4736	space	100	A	0		Primates	anotation	AGGCAGGTTATCTGGGCTGCCATCTCCCACTGGCTGCTTGCCTGCCT	chr16 - 43855441 43855488	space
mir-454	TCTGTTTATCACCAGATCCTAGAACCCTATCAATATTGTCTCTGCTGTGTAAATAGTTCTGAGTAGTGCAATATTGCTTATAGGGTTTTGGTGTTTGGGAAGAACAATGGGCAGG	..(((((.((.((((((.((((((((((((((((((((((((.(((((....)))))...)))....)))))))))...)))))))))))).)))))))).))))).........	chr16 - 44684077 44684192	intron	100	0	-42.3	yes	mir-454	Vertebrates	a, b		mir-454	intron	100	A	1	mir-454	Vertebrata	Ref1	TCTGTTTATCACCAGATCCTAGAACCCTATCAATATTGTCTCTGCTGTGTAAATAGTTCTGAGTAGTGCAATATTGCTTATAGGGTTTTGGTGTTTGGGAAGAACAATGGGCAGG	chr16 - 44684077 44684192	intron
mir-301a	ACTGCTAACGAATGCTCTGACTTTATTGCACTACTGTACTTTACAGCTAGCAGTGCAATAGTATTGTCAAAGCATCTGAAAGCAGG	.(((((..((.(((((.((((.((((((((((.((((........)).)).))))))))))....)))).))))).))..))))).	chr16 - 44697955 44698041	intron	100	0	-30.2	yes	mir-130	Vertebrates	a, b		mir-301a	intron	100	A	1	mir-130	Vertebrata	Ref1	ACTGCTAACGAATGCTCTGACTTTATTGCACTACTGTACTTTACAGCTAGCAGTGCAATAGTATTGTCAAAGCATCTGAAAGCAGG	chr16 - 44697955 44698041	intron
mir-4729	TCTGTTTCCTCATGTATCTGTTGGGAAGCTAACTGTCACCTTAGCGTCCCAGCCGATAAATGAGGAAGCAGA	(((((((((((((.((((.(((((((.(((((........))))).))))))).)))).)))))))))))))	chr16 + 44916809 44916881	intron	94.44	1	-41.3	no		Primates	b, c		mir-4729	intron	94.44	B	0		Primates	anotation	TCTGTTTCCTCATGTATCTGTTGGGAAGCTAACTGTCACCTTAGCGTCCCAGCCGATAAATGAGGAAGCAGA	chr16 + 44916809 44916881	intron
mir-21	TGTCGGGTAGCTTATCAGACTGATGTTGACTGTTGAATCTCATGGCAACACCAGTCGATGGGCTGTCTGACA	((((((((((((((((.(((((.(((((.((((.((...))))))))))).)))))))))))))))))))))	chr16 + 45407574 45407646	3UTR	100	0	-34.6	yes	mir-21	Vertebrates	a, b		mir-21	3UTR	100	A	1	mir-21	Vertebrata	Ref1	TGTCGGGTAGCTTATCAGACTGATGTTGACTGTTGAATCTCATGGCAACACCAGTCGATGGGCTGTCTGACA	chr16 + 45407574 45407646	3UTR
mir-378j	ATGCAGTGAGTGGGGGAGGAACTGGATTTGGAGCCAGAAGAACTGGTTCTAATATCTACTTCCCTGTGTAGAGTTGGGATTTGGGATTATATGAGTTAGTACACACCAA	..........(((((((((...(((((((((((((((.....)))))))))).)))))))))))((((((.......((((((........))))))..))))))))).	chr16 - 49061568 49061677	intron	100	0	-30.7	no	mir-378	Mammals	a, b		mir-378j	intron	100	A	0	mir-378	Mammalia	Ref1	ATGCAGTGAGTGGGGGAGGAACTGGATTTGGAGCCAGAAGAACTGGTTCTAATATCTACTTCCCTGTGTAGAGTTGGGATTTGGGATTATATGAGTTAGTACACACCAA	chr16 - 49061568 49061677	intron
mir-4734	CTCGGGCCCGACCGCGCCGGCCCGCACCTCCCGGCCCGGAGCTGCGGGCTGCGGTCGGGGCGGTCCCGGG	(((((((((((((((...((((((((.((((......)))).))))))))))))))))).....))))))	chr16 - 50195213 50195283	space	97.14	1	-49.9	no		Primates	b, c		mir-4734	space	97.14	B	0		Primates	anotation	CTCGGGCCCGACCGCGCCGGCCCGCACCTCCCGGCCCGGAGCTGCGGGCTGCGGTCGGGGCGGTCCCGGG	chr16 - 50195213 50195283	space
mir-6779	GAGCTCTGGGAGGGGCTGGGTTTGGCAGGGCAGTTTTCGAGCCCTGTCTCCTCCCATCTTCCAG	.....((((((((...((((...((((((((.........))))))))....))))))))))))	chr16 + 50434077 50434141	intron	95.31	0	-30.3	no		Primates	b, c		mir-6779	intron	95.31	A	0		Primates	anotation	GAGCTCTGGGAGGGGCTGGGTTTGGCAGGGCAGTTTTCGAGCCCTGTCTCCTCCCATCTTCCAG	chr16 + 50434077 50434141	intron
mir-548bc	TCTTTTGTTACAGGTTGGTGAAAAGTAATCGCGGTTTTTGCCATTACTGTTAATTAACAGTAACTGCCATTATTGTTAATGGCAAAAACTGTGATTACTTTTGCACAAACCTAATATAATATTTGGTCTTCAATCA	....((((...(((((.(((((((((((((((((((((((((((((..........(((((((......))))))))))))))))))))))))))))))))).))).)))))...)))).................	chr16 + 50855225 50855361	space	97.27	0	-48.4	no	mir-548	Primates	b		mir-548bc	space	97.27	A	0	mir-548	Primates		TCTTTTGTTACAGGTTGGTGAAAAGTAATCGCGGTTTTTGCCATTACTGTTAATTAACAGTAACTGCCATTATTGTTAATGGCAAAAACTGTGATTACTTTTGCACAAACCTAATATAATATTTGGTCTTCAATCA	chr16 + 50855225 50855361	space
mir-6884	CCCACAGAGGCTGAGAAGGTGATGGTGGTTCAGGAAAGGGAGATAGATGGTAGCCCATCACCTTTCCCTCTCCCCTAG	.((((....(((.....)))....))))....(((.(((((((..(((((....)))))...))))))).))).....	chr16 - 51642471 51642549	intron	93.59	1	-26	no		Primates	b, c		mir-6884	intron	93.59	B	0		Primates	anotation	CCCACAGAGGCTGAGAAGGTGATGGTGGTTCAGGAAAGGGAGATAGATGGTAGCCCATCACCTTTCCCTCTCCCCTAG	chr16 - 51642471 51642549	intron
mir-6866	CCATTTTAGAGGCTGGAATAGGGATTATTGAGTCTGGAAGAGTAAGGATCCCTTTATCTGTCCTCTAGG	.....(((((((.((((..(((((((....(.(((...))).)...)))))))...)))).))))))).	chr16 + 51796961 51797030	intron	94.2	0	-21.9	yes		Primates	b		mir-6866	intron	94.2	A	2		Primates		CCATTTTAGAGGCTGGAATAGGGATTATTGAGTCTGGAAGAGTAAGGATCCCTTTATCTGTCCTCTAG	chr16 + 51796961 51797030	intron
mir-6867	CCCGGTGTGTGTGTAGAGGAAAAAGGGAGGCTGGGAACCTGACTGCCTCTCCCTCTTTACCCACTAG	...((((.(.(((.(((((.....(((((((.((........)))))))))))))).))))))))..	chr16 + 51829991 51830058	intron	97.01	0	-24.7	no		Primates	b, c		mir-6867	intron	97.01	A	0		Primates	anotation	CCCGGTGTGTGTGTAGAGGAAAAAGGGAGGCTGGGAACCTGACTGCCTCTCCCTCTTTACCCACTAG	chr16 + 51829991 51830058	intron
mir-6510	AGCAGCAAGGGAGAGAGAGGAGTCCTCTAGGCACCAACTCTGTCTCCTGCAGAT	....(((..(((((.((((..((((....)).))...)))).))))))))....	chr16 - 53172827 53172881	intron	94.44	1	-19.3	no		Primates	b, c		mir-6510	intron	94.44	B	0		Primates	anotation	AGCAGCAAGGGAGAGAGAGGAGTCCTCTAGGCACCAACTCTGTCTCCTGCAGAT	chr16 - 53172827 53172881	intron
mir-548at	AAAAGTTGTTGCGGTTTTGGCCGCCAAAAGAAATGGCCAAAACCGCAATAACTTTTGT	(((((((((((((((((((((((..........)))))))))))))))))))))))..	chr16 + 54250187 54250245	intron	94.83	1	-34.6	yes	mir-548	Primates	b		mir-548at	intron	94.83	B	2	mir-548	Primates	novel	AAAAGTTGTTGCGGTTTTGGCCGCCAAAAGAAATGGCCAAAACCGCAATAACTTTTGT	chr16 + 54250187 54250245	intron
mir-5010	GGTCCAGGGAACCCTAGTGGGGGAATGGCAGAGCAAAATTCGTGCCTACAGCTACCTCTTGCCAAACTGCACTGGATTTTGTGTCTCCCATTCCCCAGAGCTGTCTGAGGTGCTTTGGAC	.((((((((.((((((((.(((((((((.((((((((((((((((.....((........))......)))).))))))))).))).)))))))))...))))...).))).))))))))	chr16 + 54269684 54269804	intron	93.33	0	-50	no		Primates	a, b		mir-5010	intron	93.33	A	0		Primates	Ref2	GGTCCAGGGAACCCTAGTGGGGGAATGGCAGAGCAAAATTCGTGCCTACAGCTACCTCTTGCCAAACTGCACTGGATTTTGTGTCTCCCATTCCCCAGAGCTGTCTGAGGTGCTTTG	chr16 + 54269684 54269804	intron
mir-8101	CTCCGAATGTTGTTGTTGGTGGCGGCGGCGAGCGGAGCCGGAGGAGCCGCCGCAAAGATGGAGGAGCCGTCGAGGAGGCGCTGCCGTCGCTGCCGCCGCCGCTGCTGCCGC	................((((((((((((((.(((((((.((.(((((.(((.(...(((((.....)))))...).)))))).)).))))).)))))))))))))))))).	chr16 - 55891624 55891735	5UTR	96.4	0	-60.7	no		Mammals	b, c		mir-8101	5utr	96.4	A	0		Mammalia	anotation	CTCCGAATGTTGTTGTTGGTGGCGGCGGCGAGCGGAGCCGGAGGAGCCGCCGCAAAGATGGAGGAGCCGTCGAGGAGGCGCTGCCGTCGCTGCCGCCGCCGCTGCTGCCGC	chr16 - 55891624 55891735	5UTR
mir-6782	TGGGGTAGGGGTGGGGGGATTCAGGGGTGTCTGGAACTCACGGCTGCCACCTTCGTGTCCCCATCCTGCAG	....((((((.((((((.((..(((((((.(((.......))).)))).)))..)).))))))))))))..	chr16 - 55988372 55988443	intron	95.65	1	-31.4	no		Mammals	b, c		mir-6782	intron	95.65	B	0		Mammalia	anotation	TGGGGTAGGGGTGGGGGGATTCAGGGGTGTCTGGAACTCACGGCTGCCACCTTCGTGTCCCCATCCTGCAG	chr16 - 55988372 55988443	intron
mir-6783	CCTGTTAGGGGAAAAGTCCTGGTCGGGGAACCCACAGCCCCGTTCCTGGGCCTCTCCTCTGTAG	.....(((((((...((((.((.(((((.........)))))..)).))))...)))))))...	chr16 - 56746450 56746514	intron	95.31	1	-25.7	no		Primates	b		mir-6783	intron	95.31	B	0		Primates		CCTGTTAGGGGAAAAGTCCTGGTCGGGGAACCCACAGCCCCGTTCCTGGGCCTCTCCTCTGTAG	chr16 - 56746450 56746514	intron
mir-6784	TATAGGCCGGGGCTTTGGGTGAGGGACCCCCGGGGTCTGTCACAGTCTCACCCCAACTCTGCCCCAG	........(((((...(((((((((((((...))))))........))))))).......)))))..	chr16 - 56928860 56928927	intron	95.52	0	-28.6	no		Primates	b, c		mir-6784	intron	95.52	A	0		Primates	anotation	TATAGGCCGGGGCTTTGGGTGAGGGACCCCCGGGGTCTGTCACAGTCTCACCCCAACTCTGCCCCAG	chr16 - 56928860 56928927	intron
mir-4315-2	TGGGCTTTGCCCGCTCTCTGAGCTGGACCCTCTCTCTACCTCTGGTGCAGAACTACAGCGGAAGGAGTCTCTG	.(((((((..(((((....(..(((.(((..............))).)))..)...)))))..)))))))...	chr16 - 57308295 57308368	CDS	97.26	1	-22.8	no	mir-4315	Primates	b, c		mir-4315-2	CDS	97.26	B	0	mir-4315	Primates	anotation	TGGGCTTTGCCCGCTCTCTGAGCTGGACCCTCTCTCTACCTCTGGTGCAGAACTACAGCGGAAGGAGTCTCTG	chr16 - 57308295 57308368	cds
mir-8885	CTTCTAGTCTGTTCTCTGGGGAGGCAGTAAGGGGCCGTGGAGCTGGCCTCGGCCTCGGCCTCGGCATCGGGAGAGGCTGGACTTCCTGTCTCTCTGTGCTGAATGGCTGCGATGGCGCCCGCTCTCACTGACGCAGCAGCTGAAGCACACCATATCC	((((.(((((((((..(((((.(((.....(((((((.((......)).)))))))(((((((((((..((((((((.((....)).)))))))))))))))..))))((....)))))...)))))..)).))))..)))))))............	chr16 - 58535638 58535795	5UTR	97.93	0	-64.1	no		Mammals	b		mir-8885	5utr	97.93	A	0		Mammalia		CTTCTAGTCTGTTCTCTGGGGAGGCAGTAAGGGGCCGTGGAGCTGGCCTCGGCCTCGGCCTCGGCATCGGGAGAGGCTGGACTTCCTGTCTCTCTGTGCTGAATGGCTGCGATGGCGCCCGCTCTCACTGACGCAGCAGCTGAAGCACACCATATCC	chr16 - 58535638 58535795	5UTR
mir-633	AACCTCTCTTAGCCTCTGTTTCTTTACTGTGGTAGATACTATTAGCCTAAAATAAGAAGGCTAATAGTATCTACCACAATAAAATTATTGTGATGATA	......................((((.(((((((((((((((((((((.........))))))))))))))))))))).))))...............	chr16 + 60221556 60221654	space	98.98	0	-35.7	no	mir-633	Primates	a, b		mir-633	space	98.98	A	0	mir-633	Primates	Ref1	AACCTCTCTTAGCCTCTGTTTCTTTACTGTGGTAGATACTATTAGCCTAAAATAAGAAGGCTAATAGTATCTACCACAATAAAATTATTGTGATGATA	chr16 + 60221556 60221654	space
mir-3064	GGTCTGGCTGTTGTGGTGTGCAAAACTCCGTACATTGCTATTTTGCCACACTGCAACACCTTACAGA	.((..((.(((((((((((((((((...((.....))...))))).))))))))))))))..))...	chr16 - 61839928 61839995	intron	100	0	-23	yes	mir-3064	Vertebrates	a, b		mir-3064	intron	100	A	1	mir-3064	Vertebrata	Ref2	GGTCTGGCTGTTGTGGTGTGCAAAACTCCGTACATTGCTATTTTGCCACACTGCAACACCTTACAGA	chr16 - 61839928 61839995	intron
mir-5047	GAAGCGCTTGCCTAGACGAGACACAGTGCATAAAAACAACTTTTGGGGGACAGGTATGTTTTCTTGCAGCTGCGGTTGTAAGGTCTTGGCAAGACAAGCA	...(((((((((.((((..(((.(((((((..(((((((((..((.....))))).))))))..)))).)))..))).....)))).)))))).)..)).	chr16 - 61840368 61840468	intron	100	0	-31.3	no		Primates	b, c		mir-5047	intron	100	A	0		Primates	anotation	GAAGCGCTTGCCTAGACGAGACACAGTGCATAAAAACAACTTTTGGGGGACAGGTATGTTTTCTTGCAGCTGCGGTTGTAAGGTCTTGGCAAGACAAGCA	chr16 - 61840368 61840468	intron
mir-4524b	TAGCTGGGTGGATGTATTCTTTGGAAGGATAGCAGCATGAGCCTGTCTCAAAATAATTCTGCAATGAGACAGGCTTATGCTGCTATCCTTCCAAAGAGGAAGGGTAATCACTGTC	......(((((((...((((((((((((((((((((((((((((((((((..............)))))))))))))))))))))))))))))))))).....))..)))))...	chr16 + 66244898 66245013	space	93.91	1	-64.9	no	mir-4524	Primates	b, c		mir-4524b	space	93.91	B	0	mir-4524	Primates	anotation	TAGCTGGGTGGATGTATTCTTTGGAAGGATAGCAGCATGAGCCTGTCTCAAAATAATTCTGCAATGAGACAGGCTTATGCTGCTATCCTTCCAAAGAGGAAGGGTAATCACTGTC	chr16 + 66244898 66245013	space
mir-4524a	AAAGAGACAGTGATTACCCTTCCTCTTTGGAAGGATAGCAGCATAAGCCTGTCTCATTGCAGAATTATTTTGAGACAGGCTCATGCTGCTATCCTTCCAAAGAATACATCC	.......................(((((((((((((((((((((.(((((((((((..............))))))))))).)))))))))))))))))))))........	chr16 - 66244907 66245018	intron	94.59	1	-58.6	no	mir-4524	Primates	b		mir-4524a	intron	94.59	B	0	mir-4524	Primates		AAAGAGACAGTGATTACCCTTCCTCTTTGGAAGGATAGCAGCATAAGCCTGTCTCATTGCAGAATTATTTTGAGACAGGCTCATGCTGCTATCCTTCCAAAGAATACATCC	chr16 - 66244907 66245018	intron
mir-684-1	GTAGGGCAATCTGTCTTTAAGTAGGGATAAATTACTCTAAAACAAAAAAGAATCTTAGATAGTTTTCCCTTCAAGTCAAGCGTCTTGT	.((((((....((.(((.....(((((.((((((.(((((..............))))))))))))))))..))).))...)))))).	chr16 - 72448366 72448454	3UTR	94.19	0	-16.3	no	mir-684	Mammals	b		mir-684-1	3UTR	94.19	A	0	mir-684	Mammalia		GTAGGGCAATCTGTCTTTAAGTAGGGATAAATTACTCTAAAACAAAAAAGAATCTTAGATAGTTTTCCCTTCAAGTCAAGCGTCTTGT	chr16 - 72448366 72448454	3UTR
mir-4738	GGGAATTGCAGTCCGGTCGCGTTTATCCTTCTTACCAGCGCGTTTTCAGTTTCAAAGGGAAGCCTCTCCATGAAACTGGAGCGCCTGGAGGAGAAGGGGGCCCAGAGCTAG	.(((.......)))((((.......((((((((.((((.((((((.((((((((..((((....))))..))))))))))))))))))..)))))))))))).........	chr16 - 73102321 73102432	space	95.45	0	-43.2	no	mir-4738	Primates	b, c		mir-4738	space	95.45	A	0	mir-4738	Primates	anotation	GGGAATTGCAGTCCGGTCGCGTTTATCCTTCTTACCAGCGCGTTTTCAGTTTCAAAGGGAAGCCTCTCCATGAAACTGGAGCGCCTGGAGGAGAAGGGGGCCCAGAGCTAG	chr16 - 73102321 73102432	space
mir-6868	CCAGGACTGGCAGAGCACTGAAGCAGCAGGCACCCGCTTCCTTCTGTTGTCCCTGCAG	.((((((.(((((((....(((((...........))))).))))))))).))))...	chr16 - 73451459 73451517	intron	93.1	1	-16	no		Primates	b, c		mir-6868	intron	93.1	B	0		Primates	anotation	CCAGGACTGGCAGAGCACTGAAGCAGCAGGCACCCGCTTCCTTCTGTTGTCCCTGCAG	chr16 - 73451459 73451517	intron
mir-636	TGGCGGCCTGGGCGGGAGCGCGCGGGCGGGGCCGGCCCCGCTGCCTGGAATTAACCCCGCTGTGCTTGCTCGTCCCGCCTGCAGCCCTAGGCGGCGTCG	..((.(((((((.....((..(((((((((((.(((..(((.((..((......))..)).)))...))).))))))))))).))))))))).))....	chr16 - 74117573 74117672	intron	100	0	-52.1	no	mir-636	Primates	a, b		mir-636	intron	100	A	0	mir-636	Primates	Ref1	TGGCGGCCTGGGCGGGAGCGCGCGGGCGGGGCCGGCCCCGCTGCCTGGAATTAACCCCGCTGTGCTTGCTCGTCCCGCCTGCAGCCCTAGGCGGCGTCG	chr16 - 74117573 74117672	intron
mir-6516	TGGGTTTTGAATTTGCAGTAACAGGTGTGAGCATTCTAGCAGCAGTTTGGTGATCATGTATGATACTGCAAACAGGACCTA	(((((((((..(((((((((.((..(((((.((((..(((....))).)))).)))))..)).))))))))))))))))))	chr16 + 74472873 74472954	intron	98.77	0	-27.8	yes	mir-6516	Vertebrates	b		mir-6516	intron	98.77	A	1	mir-6516	Vertebrata		TGGGTTTTGAATTTGCAGTAACAGGTGTGAGCATTCTAGCAGCAGTTTGGTGATCATGTATGATACTGCAAACAGGACCTA	chr16 + 74472873 74472954	intron
mir-7166	TTCTCAGCTGTGACTCCCAGGTGGCTACTCTGCAGGTAACGTGGAAGGTCTCACCTGTAAGAG	.((((((.((.((((.(((.((.(((........))).)).)))..)))).)).)))..))).	chr16 - 76760709 76760772	intron	98.41	0	-17.3	no		Cercopithecidae	a, b		mir-7166	intron	98.41	A	0		Cercopithecidae	Ref1	TTCTCAGCTGTGACTCCCAGGTGGCTACTCTGCAGGTAACGTGGAAGGTCTCACCTGTAAGAG	chr16 - 76760709 76760772	intron
mir-657	GGAGGAGAGGGTCCTGGAGAAGCGTGGACAGGTCCAGGTGGGTTCTGGCAGGTCCTCACCCTCTCTAGGCCCCATTCTC	.(((((..(((.((((((((.(.(.((((..(.(((((.....))))))..)))).).)..)))))))))))..)))))	chr16 - 78700471 78700550	intron	97.47	0	-38.2	no	mir-657	Primates	a		mir-657	intron	97.47	A	0	mir-657	Primates	Ref1	GGAGGAGAGGGTCCTGGAGAAGCGTGGACAGGTCCAGGTGGGTTCTGGCAGGTCCTCACCCTCTCTAGGCCCCATTCTC	chr16 - 78700471 78700550	intron
mir-3065	CTACCCTCTTCAACAAAATCACTGATGCTGGAGTCACCTGAGTCATCACTCAGCACCAGGATATTGTTGGAGAGGACGG	....((((((((((((.(((.(((.(((((((.((....)).))......))))).)))))).))))))))))))....	chr16 + 78701076 78701155	space	96.2	0	-33.2	no	mir-3065	Mammals	b, c		mir-3065	space	96.2	A	0	mir-3065	Mammalia	anotation	CTACCCTCTTCAACAAAATCACTGATGCTGGAGTCACCTGAGTCATCACTCAGCACCAGGATATTGTTGGAGAGGACGG	chr16 + 78701076 78701155	space
mir-338	TCTCCAACAATATCCTGGTGCTGAGTGATGACTCAGGTGACTCCAGCATCAGTGATTTTGTTGAAGA	(((.((((((.(((((((((((((((.((.......)).))).))))))))).))).)))))).)))	chr16 - 78701082 78701149	intron	100	0	-29.4	yes	mir-338	Vertebrates	a, b		mir-338	intron	100	A	1	mir-338	Vertebrata	Ref1	TCTCCAACAATATCCTGGTGCTGAGTGATGACTCAGGTGACTCCAGCATCAGTGATTTTGTTGAAGA	chr16 - 78701082 78701149	intron
mir-1250	TCTCGCTGGCCTGGAAGGTGACGGTGCTGAATGTGGCCTTTTTGCCTTTTCCAAAGGCCACATTTTCCAGCCCATTCACCCTTCCAGAGCCCTCTGAGGTGGCCTAGGCC	(((((..((((((((((((((.((.((((((((((((((((...........))))))))))))...))))))..))).)))))))).)))...))))).(((....)))	chr16 - 78708335 78708445	intron	100	0	-52	yes	mir-1250	Primates	a, b		mir-1250	intron	100	A	1	mir-1250	Primates	Ref1	TCTCGCTGGCCTGGAAGGTGACGGTGCTGAATGTGGCCTTTTTGCCTTTTCCAAAGGCCACATTTTCCAGCCCATTCACCCTTCCAGAGCCCTCTGAGGTGGCCTAGGCC	chr16 - 78708335 78708445	intron
mir-7165	GGGCGGGAATTCAGAGCCAGTCAGGGCACGGGAGTGACTGACGGCCTGTTTCTCTCCTAG	(((.(((((..(((.(((.(((((..(((....))).))))))))))).))))).)))..	chr16 + 79653680 79653740	intron	100	0	-28	no		Cercopithecidae	a, b		mir-7165	intron	100	A	0		Cercopithecidae	Ref1	GGGCGGGAATTCAGAGCCAGTCAGGGCACGGGAGTGACTGACGGCCTGTTTCTCTCCTAG	chr16 + 79653680 79653740	intron
mir-4499	AAGACTGAGAGGAGGGAACTGGTGAGTTTTAAATAGAAATGCTTTCTAACTCCTTGTCTCCGTCTGTTT	.((((.((((.(((((...(((.((((.............)))).)))..))))).)))).))))....	chr17 + 1133996 1134065	intron	95.65	0	-21	no		Primates	b, c		mir-4499	intron	95.65	A	0		Primates	anotation	AAGACTGAGAGGAGGGAACTGGTGAGTTTTAAATAGAAATGCTTTCTAACTCCTTGTCTCCGTCTGTTT	chr17 + 1133996 1134065	intron
mir-2276	GTGTTCCTTCCAGTCCGCCCTCTGTCACCTTGCAGACGGCTTTCTCTCCGAATGTCTGCAAGTGTCAGAGGCGAGGAGCAGCAGCTGCAT	.(((((((.......((((.((((.(((.(((((((((...(((.....))))))))))))))).)))))))))))))))((....))..	chr17 + 4469592 4469682	intron	97.75	0	-37.6	no		Primates	b		mir-2276	intron	97.75	A	0		Primates		GTGTTCCTTCCAGTCCGCCCTCTGTCACCTTGCAGACGGCTTTCTCTCCGAATGTCTGCAAGTGTCAGAGGCGAGGAGCAGCAGCTGCAT	chr17 + 4469592 4469682	intron
mir-7975	GAGCAAAGAGCAGGAGGACAGGGGATTGATCTCCCAAGGGAGGTCCCCTGATCCGAGTCACGGCACCA	..((...((...(((...((((((((....((((....)))))))))))).)))...))...))....	chr17 - 4923739 4923807	space	95.59	1	-26.4	no		Primates	b		mir-7975	space	95.59	B	0		Primates		GAGCAAAGAGCAGGAGGACAGGGGATTGATCTCCCAAGGGAGGTCCCCTGATCCGAGTCACGGCACCA	chr17 - 4923739 4923807	space
mir-7705	AATAGCTCAAAATGTCAGTTCTGTTTTAAGTAACAGAATTGATAACTGAGCAAGGAA	....(((((...(((((((((((((......)))))))))))))..)))))......	chr17 + 5063628 5063685	3UTR	98.25	1	-22.5	no		Primates	b, c		mir-7705	3utr	98.25	B	0		Primates	anotation	AATAGCTCAAAATGTCAGTTCTGTTTTAAGTAACAGAATTGATAACTGAGCAAGGAA	chr17 + 5063628 5063685	3UTR
mir-9946	TCGAGTGAGAATATTGAATTCCACCTATGGTCTTCCTAATGCTGTTTGAGTGATGCAAAGTAGAGAAGTTACTGTTGAAGGTACTAAATCATTCTCTACTTGG	.((((((((((((((.....((..(.((((((((((((.(((.(((.....))))))...))).))))..))))).)..)).....))).)))))).))))).	chr17 - 11104339 11104442	space	94.17	2	-22.4	no		Primates	b		mir-9946	space	94.17	C	0		Primates		TCGAGTGAGAATATTGAATTCCACCTATGGTCTTCCTAATGCTGTTTGAGTGATGCAAAGTAGAGAAGTTACTGTTGAAGGTACTAAATCATTCTCTACTTGG	chr17 - 11104339 11104442	space
mir-7171	CGAGATTCTAGGGGCTACCACGCACCTGTGTGCACAGAACAGGGTGTGTGGTGGCCCTTAGAATCTCTGC	.((((((((((((((((((((((((((.(((.......)))))))))))))))))))))))))))))...	chr17 + 12768553 12768623	space	100	0	-51.9	no		Cercopithecidae	a, b		mir-7171	space	100	A	0		Cercopithecidae	Ref1	CGAGATTCTAGGGGCTACCACGCACCTGTGTGCACAGAACAGGGTGTGTGGTGGCCCTTAGAATCTCTGC	chr17 + 12768553 12768623	space
mir-320d-1	TTCTCTTCCCAGTTCTTCCCAAAGTTGAGAAAAGCTGGGTTGAGAGGA	(((((..(((((((.(((.((....)).))).)))))))..)))))..	chr17 - 20010324 20010372	space	100	0	-20.4	yes	mir-320	Vertebrates	b, c		mir-320d-1	space	100	A	1	mir-320	Vertebrata	anotation	TTCTCTTCCCAGTTCTTCCCAAAGTTGAGAAAAGCTGGGTTGAGAGGA	chr17 - 20010324 20010372	space
mir-621	TAGATTGAGGAAGGGGCTGAGTGGTAGGCAGTGCCGCTGTGCTTTGATGAAGACCCACGTGGCTGGCAACAGCTCTTACCTTTTGTCTCTGGGTCC	((((..((.((((((...((((.((.(.((..(((((.(((((((...))))...)))))))))).).)).))))...)))))).)))))).....	chr17 + 20097535 20097631	3UTR	96.88	0	-30	no	mir-621	Primates	b, c		mir-621	3UTR	96.88	A	0	mir-621	Primates	anotation	TAGATTGAGGAAGGGGCTGAGTGGTAGGCAGTGCCGCTGTGCTTTGATGAAGACCCACGTGGCTGGCAACAGCTCTTACCTTTTGTCTCTGGGTCC	chr17 + 20097535 20097631	3UTR
mir-5006	AACCATTAGGAGGCTGTGGTTTGCCAGGGCAGGAGGTGGAAGGGAGCACCATTTACAGGGGTAACTTCCTTACCCTTTCCATCCTGGCAGGCTGCAGAGAACTTTACCAG	..((....))...((((((((((((((((..(((((.(((((((((.(((.........)))..))))))).)))))))..)))))))))))))))).............	chr17 - 20761889 20761999	intron	95.45	0	-44.9	no		Primates	b, c		mir-5006	intron	95.45	A	0		Primates	anotation	AACCATTAGGAGGCTGTGGTTTGCCAGGGCAGGAGGTGGAAGGGAGCACCATTTACAGGGGTAACTTCCTTACCCTTTCCATCCTGGCAGGCTGCAGAGAACTTTACCAG	chr17 - 20761889 20761999	intron
mir-7168	CATTTTACAGATTAAATAGTGAGGCATACTTGTACTTCAGTGTTTAATCTGTAAAATGGA	((((((((((((((((((.(((((((....))..))))).))))))))))))))))))..	chr17 - 22427833 22427893	intron	100	0	-27.6	no		Cercopithecidae	a, b		mir-7168	intron	100	A	0		Cercopithecidae	Ref1	CATTTTACAGATTAAATAGTGAGGCATACTTGTACTTCAGTGTTTAATCTGTAAAATGGA	chr17 - 22427833 22427893	intron
mir-7169	CCTTCAGTCTAGGACTCATTTTTCCCTTAAATGAGTCCTAGACTGAAGGGA	(((((((((((((((((((((.......)))))))))))))))))))))..	chr17 - 23658310 23658361	intron	100	0	-36.6	no		Cercopithecidae	a, b		mir-7169	intron	100	A	0		Cercopithecidae	Ref1	CCTTCAGTCTAGGACTCATTTTTCCCTTAAATGAGTCCTAGACTGAAGGGA	chr17 - 23658310 23658361	intron
mir-3613	TGGTTGGGTTTGGATTGTTGTACTTTTTTTTTTGTTCGTTGCATTTTTAGGAACAAAAAAAAAAGCCCAACCCTTCACACCACTTCA	(((...(((.((((..((((..(((((((((((((((.(.........).)))))))))))))))..))))..)))).)))...)))	chr17 - 29209967 29210054	intron	100	0	-26.3	yes	mir-3613	Mammals	b, c		mir-3613	intron	100	A	1	mir-3613	Mammalia	anotation	TGGTTGGGTTTGGATTGTTGTACTTTTTTTTTTGTTCGTTGCATTTTTAGGAACAAAAAAAAAAGCCCAACCCTTCACACCACTTCA	chr17 - 29209967 29210054	intron
mir-3613b	GTTGGGCTTTTTTTTTTGTTCCTAAAAATGCAACGAACAAAAAAAAAAGTACAAC	((((.((((((((((((((((.............)))))))))))))))).))))	chr17 + 29209983 29210038	space	100	0	-18.6	no	mir-3613	Mammals	b, c		mir-3613b	space	100	A	0	mir-3613	Mammalia	anotation	GTTGGGCTTTTTTTTTTGTTCCTAAAAATGCAACGAACAAAAAAAAAAGTACAAC	chr17 + 29209983 29210038	space
mir-16-1	GTCAGCAGTGCCTTAGCAGCACGTAAATATTGGCGTTAAGATTCTAAAATTATCTCCAGTATTAACTGTGCTGCTGAAGTAAGGTTGAC	((((((..(((.((((((((((((.((((((((.(.(((..........))).).)))))))).)).)))))))))).)))..))))))	chr17 - 29263944 29264033	intron	100	0	-37	yes	mir-15	Vertebrates	a, b		mir-16-1	intron	100	A	1	mir-15	Vertebrata	Ref1	GTCAGCAGTGCCTTAGCAGCACGTAAATATTGGCGTTAAGATTCTAAAATTATCTCCAGTATTAACTGTGCTGCTGAAGTAAGGTTGAC	chr17 - 29263944 29264033	intron
mir-15a	ACCTTGGAGTAAAGTAGCAGCACATAATGGTTTGTGGATTTTGAAAAGGTGCAGGCCATATTGTGCTGCCTCAAAAATACAAGGATCTGATCTTC	.(((((.......(..((((((((..((((((((((.............))))))))))..))))))))..).......)))))...........	chr17 - 29264079 29264174	intron	100	0	-31.6	yes	mir-15	Vertebrates	a, b		mir-15a	intron	100	A	1	mir-15	Vertebrata	Ref1	ACCTTGGAGTAAAGTAGCAGCACATAATGGTTTGTGGATTTTGAAAAGGTGCAGGCCATATTGTGCTGCCTCAAAAATACAAGGATCTGATCTTC	chr17 - 29264079 29264174	intron
mir-5693	CTGGGAAGTTAGTTCATTTCAGTCTGTGCCGTGAGCTAGCCAGCAGTGGCTCTGAAATGGACTCAAACTCTAG	((((..((((((((((((((((.....(((((..(((....))).))))).))))))))))))..))))))))	chr17 - 30600124 30600197	space	97.26	1	-22.7	no		Primates	b, c		mir-5693	space	97.26	B	0		Primates	anotation	CTGGGAAGTTAGTTCATTTCAGTCTGTGCCGTGAGCTAGCCAGCAGTGGCTCTGAAATGGACTCAAACTCTAG	chr17 - 30600124 30600197	space
mir-4703	TGGCAATACAGTACAAATACAGTGTGTTTGATTTGCACTGTAGTTGTACTGTATTGCCGCT	.(((((((((((((((.(((((((((.......))))))))).)))))))))))))))...	chr17 + 30804536 30804597	space	98.36	0	-36	no	mir-4703	Primates	a, b		mir-4703	space	98.36	A	0	mir-4703	Primates	Ref1	TGGCAATACAGTACAAATACAGTGTGTTTGATTTGCACTGTAGTTGTACTGTATTGCCGCT	chr17 + 30804536 30804597	space
mir-759	GGATTATAATAAATTAAATGCCTAAACTGGCAGAGTGCAAACAATTTTGACTCAGATCTAAATGTTTGCACTGGCTGTTTAAACATTTAATTTGTT	.......(((((((((((((..(((((.(((..((((((((((.(((.((......)).))))))))))))).))))))))..)))))))))))))	chr17 + 32148612 32148708	space	100	0	-30.9	no	mir-759	Mammals	a, b		mir-759	space	100	A	0	mir-759	Mammalia	Ref1	GGATTATAATAAATTAAATGCCTAAACTGGCAGAGTGCAAACAATTTTGACTCAGATCTAAATGTTTGCACTGGCTGTTTAAACATTTAATTTGTT	chr17 + 32148612 32148708	space
mir-1297	TGATTATCTCTAGGGTTGATCTATTGGAATTACTTATCTGAGCCAAAGTAATTCAAGTAATTCAGGTGTAGTGAAAC	......((.(((.(.((((..((((.(((((((((..........))))))))).))))..)))).).))).))...	chr17 - 33663808 33663885	space	97.4	0	-19.1	no	mir-1297	Mammals	b, c		mir-1297	space	97.4	A	0	mir-1297	Mammalia	anotation	TGATTATCTCTAGGGTTGATCTATTGGAATTACTTATCTGAGCCAAAGTAATTCAAGTAATTCAGGTGTAGTGAAAC	chr17 - 33663808 33663885	space
mir-17	GTCAGAATAATGTCAAAGTGCTTACAGTGCAGGTAGTGATATGTGCATCTACTGCAGTGAAGGCACTTGTAGCATTATGGTGAC	((((..(((((((..((((((((.((.(((((.(((((.......)).)))))))).)).))))))))...)))))))..))))	chr17 + 74024859 74024943	space	100	0	-33.8	yes	mir-17	Vertebrates	a, b		mir-17	space	100	A	1	mir-17	Vertebrata	Ref1	GTCAGAATAATGTCAAAGTGCTTACAGTGCAGGTAGTGATATGTGCATCTACTGCAGTGAAGGCACTTGTAGCATTATGGTGAC	chr17 + 74024859 74024943	space
mir-18a	GTGCTTTTTGTTCTAAGGTGCATCTAGTGCAGATAGTGAAGTAGATTAGCATCTACTGCCCTAAGTGCTCCTTCTGGCATAAGAAGTTATGT	..(((((((((.((((((.((((.(((.((((.(((((..(.....)..)).))))))).))).)))).)))..))).))))))))).....	chr17 + 74024997 74025089	space	100	0	-26.9	yes	mir-17	Vertebrates	a, b		mir-18a	space	100	A	1	mir-17	Vertebrata	Ref1	GTGCTTTTTGTTCTAAGGTGCATCTAGTGCAGATAGTGAAGTAGATTAGCATCTACTGCCCTAAGTGCTCCTTCTGGCATAAGAAGTTATGT	chr17 + 74024997 74025089	space
mir-19a	GCAGTCCTCTGTTAGTTTTGCATAGTTGCACTACAAGAAGAATGTAGTTGTGCAAATCTATGCAAAACTGATGGTGGCCTGC	((((.((.(((((((((((((((((((((((((((.......))))...))))))..))))))))))))))))).)).))))	chr17 + 74025145 74025227	space	100	0	-38.7	yes	mir-19	Vertebrates	a, b		mir-19a	space	100	A	1	mir-19	Vertebrata	Ref1	GCAGTCCTCTGTTAGTTTTGCATAGTTGCACTACAAGAAGAATGTAGTTGTGCAAATCTATGCAAAACTGATGGTGGCCTGC	chr17 + 74025145 74025227	space
mir-20a	CTGATGTGACAGCTTCTGTAGCACTAAAGTGCTTATAGTGCAGGTAGTGTTTAGTTATCTACTGCATTATGAGCACTTAAAGTACTGCTAGCTGTAGAACTCCAG	(((..((.((((((...((((.(((.(((((((((((((((((.(((...........))))))))))))))))))))..))).)))).))))))...))..)))	chr17 + 74025302 74025407	space	100	0	-42.3	yes	mir-17	Vertebrates	a, b		mir-20a	space	100	A	1	mir-17	Vertebrata	Ref1	CTGATGTGACAGCTTCTGTAGCACTAAAGTGCTTATAGTGCAGGTAGTGTTTAGTTATCTACTGCATTATGAGCACTTAAAGTACTGCTAGCTGTAGAACTCCAG	chr17 + 74025302 74025407	space
mir-19b-1	ACTGAACACTGTTCTATGGTTAGTTTTGCAGGTTTGCATCCAGCTGTGTGATATTCTGCTGTGCAAATCCATGCAAAACTGACTGTGGTAGTGAAAAGT	(((...(((((..(((((((((((((((((((((((((..((((.............)))))))))).)).))))))))))))))))))))))...)))	chr17 + 74025440 74025539	space	100	0	-40.6	yes	mir-19	Vertebrates	a, b		mir-19b-1	space	100	A	1	mir-19	Vertebrata	Ref1	ACTGAACACTGTTCTATGGTTAGTTTTGCAGGTTTGCATCCAGCTGTGTGATATTCTGCTGTGCAAATCCATGCAAAACTGACTGTGGTAGTGAAAAGT	chr17 + 74025440 74025539	space
mir-92a-1	CTTTCTACACAGGTTGGGATCGGTTGCAATGCTGTGTTTCTGTATGGTATTGCACTTGTCCCGGCCTGTTGAGTTTGGTG	....((..((((((((((((.(((.(((((((((((......)))))))))))))).))))))))))))..)).......	chr17 + 74025568 74025648	space	100	0	-35.5	yes	mir-25	Vertebrates	a, b		mir-92a-1	space	100	A	1	mir-25	Vertebrata	Ref1	CTTTCTACACAGGTTGGGATCGGTTGCAATGCTGTGTTTCTGTATGGTATTGCACTTGTCCCGGCCTGTTGAGTTTGGTG	chr17 + 74025568 74025648	space
mir-4501	TGTGTGACCTTGGATGAAGCACTGAAATATGTTTGAGCTTCTGTTTCATCAGATGTCACATTTT	.(((((((.((.(((((((((((.(((....))).))....))))))))).)).)))))))...	chr17 + 79066663 79066727	intron	93.75	3	-20.4	no		Primates	b		mir-4501	intron	93.75	C	0		Primates		TGTGTGACCTTGGATGAAGCACTGAAATATGTTTGAGCTTCTGTTTCATCAGATGTCACATTTT	chr17 + 79066663 79066727	intron
mir-4306	AAGCTGTTTTGTGTTCTTAGAGTCTCCAGAGGCGTCCCTTAACCCAGAATCTTTTGACTGTCCTCTAGAGAGAAAGGCAGTAGGTCTGTACC	..((((((((............((((.(((((((((...................))).).))))).))))..)))))))).(((....)))	chr17 + 82256824 82256916	intron	94.51	1	-18.5	no		Primates	b, c		mir-4306	intron	94.51	B	0		Primates	anotation	AAGCTGTTTTGTGTTCTTAGAGTCTCCAGAGGCGTCCCTTAACCCAGAATCTTTTGACTGTCCTCTAGAGAGAAAGGCAGTAGGTCTGTACC	chr17 + 82256824 82256916	intron
mir-2681	GCCCCCTTTTTATGCATTTGTGTTTTACCACCTCCAGGAGACTGCCCAAAGACTCTTCAGTATCATGGAGTTGGTAAAGCACAGATGCATGAAAAATTCAATGTG	......((((((((((((((((((((((((.(((((.((.((((.............)))).)).))))).))))))))))))))))))))))))..........	chr17 - 84550113 84550218	intron	96.19	0	-45.5	no		Primates	b, c		mir-2681	intron	96.19	A	0		Primates	anotation	GCCCCCTTTTTATGCATTTGTGTTTTACCACCTCCAGGAGACTGCCCAAAGACTCTTCAGTATCATGGAGTTGGTAAAGCACAGATGCATGAAAAATTCAATGTG	chr17 - 84550113 84550218	intron
mir-9334	GGGACGAGGCGCGCTCCCGGTCCCGCTCGCGCCGGGACACGGCCGTGTTGGTGGAGCGCGAGCGGGACCGCGACTCCCGCCGC	.((.((.((.((((....(((((((((((((((..(((((....)))))....).))))))))))))))))).).))))))..	chr17 + 89031757 89031840	space	97.59	1	-49.2	no		Mammals	b, c		mir-9334	space	97.59	B	0		Mammalia	anotation	GGGACGAGGCGCGCTCCCGGTCCCGCTCGCGCCGGGACACGGCCGTGTTGGTGGAGCGCGAGCGGGACCGCGACTCCCGCCGC	chr17 + 89031757 89031840	space
mir-1267	CTCCCAAATCTCCTGTTGAAATGTGATCCCCACCTCCAGCATTGGGGTATTACATTTTAACATGAGATTTGGATGAGGA	((((((((((((.(((((((((((((((((((..........))))).)))))))))))))).)))))))))..)))..	chr17 - 90010172 90010251	intron	96.15	2	-39.4	no	mir-1267	Primates	b		mir-1267	intron	96.15	C	0	mir-1267	Primates		CTCCCAAATCTCCTGTTGAAATGTGATCCCCACCTCCAGCATTGGGGTATTACATTTTAACATGAGATTTGGATGAGGA	chr17 - 90010172 90010251	intron
mir-7170	AGGACTGCTGGAGGACCGCAGAGAAATGAGCCTACTCCTCTGGGGCCCTGGGCAGACCTCC	(((.(((((.(.((.((.(((((....(((....)))))))).)))).).))))).)))..	chr17 - 92649048 92649109	intron	100	0	-26.9	no		Cercopithecidae	a, b		mir-7170	intron	100	A	0		Cercopithecidae	Ref1	AGGACTGCTGGAGGACCGCAGAGAAATGAGCCTACTCCTCTGGGGCCCTGGGCAGACCTCC	chr17 - 92649048 92649109	intron
mir-8073	GATTTCAGTGACCTGGCAGGAGGGAGCGTCGTCAGTGTTTGACTGTTTATGGTATGTCAGGGAACTGGTTCC	((..(((((..(((((((.....((((((((........)))).))))......)))))))..))))).)).	chr17 + 92751231 92751303	intron	97.22	1	-24.3	no		Primates	b, c		mir-8073	intron	97.22	B	0		Primates	anotation	GATTTCAGTGACCTGGCAGGAGGGAGCGTCGTCAGTGTTTGACTGTTTATGGTATGTCAGGGAACTGGTTCC	chr17 + 92751231 92751303	intron
mir-684-1	GTAGGGCAATCTGTCTTTAAGTAGGGATAAATTACTCTAAAACAAAAAAGAATCTTAGATAGTTTTCCCTTCAAGTCAAGCGTCTTGT	.((((((....((.(((.....(((((.((((((.(((((..............))))))))))))))))..))).))...)))))).	chr18 + 5592613 5592701	3UTR	94.19	0	-16.3	no	mir-684	Mammals	b, c		mir-684-1	3UTR	94.19	A	0	mir-684	Mammalia	anotation	GTAGGGCAATCTGTCTTTAAGTAGGGATAAATTACTCTAAAACAAAAAAGAATCTTAGATAGTTTTCCCTTCAAGTCAAGCGTCTTGT	chr18 + 5592613 5592701	3UTR
mir-548av	AAAAGTACTTGTGGATTTGCCATTACCTTTACCTTTAATGGCAAAACTGCAGTTACTTTTGC	(((((((.((((((.((((((((((..........)))))))))).)))))).)))))))..	chr18 + 7283161 7283223	intron	96.77	0	-22.1	yes	mir-548	Primates	c		mir-548av	intron	96.77	A	1	mir-548	Primates	anotation	AAAAGTACTTGTGGATTTGCCATTACCTTTACCTTTAATGGCAAAACTGCAGTTACTTTTGC	chr18 + 7283161 7283223	intron
mir-7173	ATGCTGTGTGTCCTCAAGCTGGCTTCCCAGATGCCGCTGGAGAACACCACGGTTCA	..(((((((((.(((.(((.(((.((...)).)))))).))).))).))))))...	chr18 + 10083512 10083568	CDS	100	0	-22.1	no		Cercopithecidae	a, b		mir-7173	cds	100	A	0		Cercopithecidae	Ref1	ATGCTGTGTGTCCTCAAGCTGGCTTCCCAGATGCCGCTGGAGAACACCACGGTTCA	chr18 + 10083512 10083568	cds
mir-122a	CCTTAGCAGAGCTGTGGAGTGTGACAATGGTGTTTGTGTCTAAACTATCAAACGCCATTATCACACTAAATAGCTACTACTAGGC	.(((((.((((((((..(((((((.(((((((((((............))))))))))).)))))))..)))))).)).))))).	chr18 - 22098141 22098226	space	100	0	-39	yes	mir-122	Vertebrates	a, b		mir-122a	space	100	A	4	mir-122	Vertebrata	Ref1	CCTTAGCAGAGCTGTGGAGTGTGACAATGGTGTTTGTGTCTAAACTATCAAACGCCATTATCACACTAAATAGCTACTACTAGGC	chr18 - 22098141 22098226	space
mir-122b	TAGTAGCTATTTAGTGTGATAATGGCGTTTGATAGTTTAGACACAAACACCATTGTCACACTCCACAGCTCTG	(((.((((....(((((((((((((.(((((...((....)).))))).)))))))))))))....)))))))	chr18 + 22098147 22098220	space	98.63	0	-29	no	mir-122	Vertebrates	b, c		mir-122b	space	98.63	A	0	mir-122	Vertebrata	anotation	TAGTAGCTATTTAGTGTGATAATGGCGTTTGATAGTTTAGACACAAACACCATTGTCACACTCCACAGCTCTG	chr18 + 22098147 22098220	space
mir-4528	TATTCTACTGAGAGTACAGGCCTTTATATATATGATCATTATATGTGTGATGAGGTCATTATATGTATGATCTGGACACCCAGTAGAATC	.(((((((((.(.((.((((...(((((((((((((((((((....))))))).....)))))))))))))))).)).).))))))))).	chr18 - 28422522 28422612	intron	95.56	0	-27.4	no		Primates	b		mir-4528	intron	95.56	A	0		Primates		TATTCTACTGAGAGTACAGGCCTTTATATATATGATCATTATATGTGTGATGAGGTCATTATATGTATGATCTGGACACCCAGTAGAATC	chr18 - 28422522 28422612	intron
mir-4744	GTAATCACATCTAAAGACTAGACTTCACTGTGACCAGGCCATAGTAAGCATCATAGTATGTCTAGTCTTTAGGCTTGATTAC	(((((((..((((((((((((((...(((((((....((........)).)))))))..))))))))))))))..)))))))	chr18 + 32761862 32761944	intron	95.12	2	-33.2	no		Primates	b, c		mir-4744	intron	95.12	C	0		Primates	anotation	GTAATCACATCTAAAGACTAGACTTCACTGTGACCAGGCCATAGTAAGCATCATAGTATGTCTAGTCTTTAGGCTTGATTAC	chr18 + 32761862 32761944	intron
mir-4743	GCTGGCCGGATGGGACAGGAGGCATGAATGAGCCATCTTTCCAATGCCTTTCTGTCTTTTCTGGTCCAG	.(((((((((.(((((((((((((((((.((....)).)))..))))).))))))))).))))).))))	chr18 - 33148266 33148335	intron	100	0	-34.5	no	mir-4743	Primates	a, b		mir-4743	intron	100	A	0	mir-4743	Primates	Ref1	GCTGGCCGGATGGGACAGGAGGCATGAATGAGCCATCTTTCCAATGCCTTTCTGTCTTTTCTGGTCCAG	chr18 - 33148266 33148335	intron
mir-4527	CCAGAAGTGGTCTGCAAAGAGATGACTGTGGATCCCAGATCCACGTCAGCTCTGTGCTGCCTACATCTGA	.((((.((((.(.(((.((((.((((.(((((((...))))))))))).)))).))).).)))).)))).	chr18 - 34495288 34495358	space	95.71	0	-33.7	no		Primates	b		mir-4527	space	95.71	A	0		Primates		CCAGAAGTGGTCTGCAAAGAGATGACTGTGGATCCCAGATCCACGTCAGCTCTGTGCTGCCTACATCTGA	chr18 - 34495288 34495358	space
mir-5583-1	AAACTAATATACCCATATTCTGGCTAGGTGATCATCAGAGTATGGGTATATTAGTTTGG	(((((((((((((((((((((((...........)))))))))))))))))))))))..	chr18 - 42282279 42282338	space	98.31	0	-30.2	no	mir-5583	Primates	c		mir-5583-1	space	98.31	A	0	mir-5583	Primates	anotation	AAACTAATATACCCATATTCTGGCTAGGTGATCATCAGAGTATGGGTATATTAGTTTGG	chr18 - 42282279 42282338	space
mir-5583-2	AAACTAATATACCCATACTCTGATGATCACCTAGCCAGAATATGGGTATATTAGTTTGC	(((((((((((((((((.((((.............)))).)))))))))))))))))..	chr18 + 42282281 42282340	space	96.61	0	-26	no	mir-5583	Primates	c		mir-5583-2	space	96.61	A	0	mir-5583	Primates	anotation	AAACTAATATACCCATACTCTGATGATCACCTAGCCAGAATATGGGTATATTAGTTTGC	chr18 + 42282281 42282340	space
mir-4318	GCTTCTTAATTATGTCATAAACCCACTGTGGGCAAGGGCCTTGTTTTAGACAGTCACTGTTGGTACATGCTAGGTGGTCAA	......................(((((...((((.(.(((........(((((...)))))))).).)))).)))))....	chr18 - 44384180 44384261	space	95.06	1	-15.1	no		Primates	b, c		mir-4318	space	95.06	B	0		Primates	anotation	GCTTCTTAATTATGTCATAAACCCACTGTGGGCAAGGGCCTTGTTTTAGACAGTCACTGTTGGTACATGCTAGGTGGTCAA	chr18 - 44384180 44384261	space
mir-3929	AGTGGCTCACACCAGTAATCTCAGCACTTCGGGAGGCTGATGTGGGTAGACCACT	(((((((((((.((((..((((........)))).)))).))))))....)))))	chr18 + 46072504 46072559	space	94.55	1	-20.5	no		Primates	b, c		mir-3929	space	94.55	B	0		Primates	anotation	AGTGGCTCACACCAGTAATCTCAGCACTTCGGGAGGCTGATGTGGGTAGACCACT	chr18 + 46072504 46072559	space
mir-187	GGTCAGGCTCACTATGACACAGTGTGAGACCTCGGGCTACAACACAGGACCCGGGTGCTGCTCTGACCCCTCGTGTCTTGTGTTGCAGCCGGAGGGACGCAGGTCCGCA	.......(((((..((...))..)))))..(((.((((.((((((((((((.((((.(......)))))...).))))))))))).)))).)))((((....))))...	chr18 + 46101824 46101933	space	100	0	-48.3	yes	mir-187	Vertebrates	a, b		mir-187	space	100	A	1	mir-187	Vertebrata	Ref1	GGTCAGGCTCACTATGACACAGTGTGAGACCTCGGGCTACAACACAGGACCCGGGTGCTGCTCTGACCCCTCGTGTCTTGTGTTGCAGCCGGAGGGACGCAGGTCCGCA	chr18 + 46101824 46101933	space
mir-7172	AGGCCTCTCAGGGTTTCTGGATGTGTGTGTGTTCCATAAACCCTCAGAGAGTCACC	.(((((((.(((((((.((((...........)))).))))))).)))).)))...	chr18 + 46529908 46529964	space	100	0	-22.9	yes		Cercopithecidae	a, b		mir-7172	space	100	A	1		Cercopithecidae	Ref1	AGGCCTCTCAGGGTTTCTGGATGTGTGTGTGTTCCATAAACCCTCAGAGAGTCACC	chr18 + 46529908 46529964	space
mir-320c-2	AGGAGCACTGGGTATGTACAAATAAAATGGCATGGCAGGCCTTCTCTTTCCAGTTCTTCCCAGAATTGGGAAAAGCTGGGTTGACAGGGTAAAAAAAAGAAAAACAAAT	.......(((..(((((.((.......))))))).)))(((((.((..(((((((.((((((....)))))).)))))))..)).)))))...................	chr18 - 57950173 57950282	space	100	0	-29.9	no	mir-320	Vertebrates	a, b		mir-320c-2	space	100	A	0	mir-320	Vertebrata	Ref1	AGGAGCACTGGGTATGTACAAATAAAATGGCATGGCAGGCCTTCTCTTTCCAGTTCTTCCCAGAATTGGGAAAAGCTGGGTTGACAGGGTAAAAAAAAGAAAAACAAAT	chr18 - 57950173 57950282	space
mir-4741	CGGGCGGGGCGGGTCCGGCCGCCTCCGTGCCCGGCCGGCAGCCCCCGGCCTTAAAGCGCGGGCTGTCCGGAGGGGTCGGCCTTCCCACCG	..((.((((.(((.((((((.((((((.((((((((((......)))))).........))))....))))))))))))))))))).)).	chr18 - 59351483 59351573	intron	97.78	0	-53.5	no		Primates	b, c		mir-4741	intron	97.78	A	0		Primates	anotation	CGGGCGGGGCGGGTCCGGCCGCCTCCGTGCCCGGCCGGCAGCCCCCGGCCTTAAAGCGCGGGCTGTCCGGAGGGGTCGGCCTTCCCACCG	chr18 - 59351483 59351573	intron
mir-1b	CTCAGTTTAATTCTCTTTTGGTGGTCTATTGCCTACCAAAAATACATACTTCTTTACATTCCATAGCATTGTATGTTCATATGGGTACATAAAGAAGTATGTACTCTGAGTAGGTATTAAGTTGTTAGCTGTAAAA	(((((..........(((((((((.(....).))))))))).((((((((((((((...((((((((((...))))...))))))....))))))))))))))..)))))(((.((.........)).))).....	chr18 - 60473805 60473941	intron	94.85	0	-36.3	no	mir-1	Vertebrates	b		mir-1b	intron	94.85	A	0	mir-1	Vertebrata		CTCAGTTTAATTCTCTTTTGGTGGTCTATTGCCTACCAAAAATACATACTTCTTTACATTCCATAGCATTGTATGTTCATATGGGTACATAAAGAAGTATGTACTCTGAGTAGGTATTAAGTTGTTAGCTGTA	chr18 - 60473805 60473941	intron
mir-1-2	ACCTACTCAGAGTACATACTTCTTTATGTACCCATATGAACATACAATGCTATGGAATGTAAAGAAGTATGTATTTTTGGTAGGC	.((((((.(((((((((((((((((((((..(((((..(........)..))))).))))))))))))))))))))).)))))).	chr18 + 60473826 60473911	space	100	0	-36	yes	mir-1	Vertebrates	a, b		mir-1-2	space	100	A	5	mir-1	Vertebrata	Ref1	ACCTACTCAGAGTACATACTTCTTTATGTACCCATATGAACATACAATGCTATGGAATGTAAAGAAGTATGTATTTTTGGTAGGC	chr18 + 60473826 60473911	space
mir-133a-1	ACAATGCTTTGCTAGAGCTGGTAAAATGGAACCAAATCGCCTCTTCAATGGATTTGGTCCCCTTCAACCAGCTGTAGCTATGCATTGA	.((((((...((((.(((((((..((.((.((((((((............)))))))).)).))..))))))).))))...)))))).	chr18 + 60477100 60477188	space	100	0	-40.7	no	mir-133	Vertebrates	a, b		mir-133a-1	space	100	A	0	mir-133	Vertebrata	Ref1	ACAATGCTTTGCTAGAGCTGGTAAAATGGAACCAAATCGCCTCTTCAATGGATTTGGTCCCCTTCAACCAGCTGTAGCTATGCATTGA	chr18 + 60477100 60477188	space
mir-320c-1	AAAAATGAGGCCTTATCTTCCCAGTTCTTCCCAGAGTCAGGAAAAGCTGGGTTGAGAGGGTAGAAAAAAAAT	.........(((((.((..(((((((.((((........)))).)))))))..)).)))))...........	chr18 - 60637934 60638006	space	98.61	0	-24.3	yes	mir-320	Vertebrates	b, c		mir-320c-1	space	98.61	A	1	mir-320	Vertebrata	anotation	AAAAATGAGGCCTTATCTTCCCAGTTCTTCCCAGAGTCAGGAAAAGCTGGGTTGAGAGGGTAGAAAAAAAAT	chr18 - 60637934 60638006	space
mir-6718	AGTGAATCCCTAGTGGCCAGAGGGCTTATGATATATTGTGAGAGCCATGTCATAAGCCCTTTGGCCACTAGGGATTCAGT	..((((((((((((((((((((((((((((((((...((....)).))))))))))))))))))))))))))))))))..	chr18 + 65062633 65062713	intron	96.25	1	-59.9	no		Primates	b		mir-6718	intron	96.25	B	0		Primates		AGTGAATCCCTAGTGGCCAGAGGGCTTATGATATATTGTGAGAGCCATGTCATAAGCCCTTTGGCCACTAGGGATTCAGT	chr18 + 65062633 65062713	intron
mir-4317	AAAAGGCGAGACATTGCCAGGGAGTTTATTTTGTAGCTCTCTTGATAAAATGTTTTAGCAAACAC	.....((((((((((..(((((((((........))))).))))....)))))))).))......	chr18 - 67453152 67453217	intron	100	0	-16.3	no		Primates	b		mir-4317	intron	100	A	0		Primates		AAAAGGCGAGACATTGCCAGGGAGTTTATTTTGTAGCTCTCTTGATAAAATGTTTTAGCAAACAC	chr18 - 67453152 67453217	intron
mir-7174	AGGAGTGACAGAGTTAGACTCTTTTTTTTTTTTTGAGACAGAGTCTCGCTCTGTCAGTCAGGCT	..((.(((((((((.(((((((.((((.......)))).))))))).))))))))).)).....	chr18 - 68584348 68584412	space	98.44	0	-30	yes		Cercopithecidae	a, b		mir-7174	space	98.44	A	1		Cercopithecidae	Ref1	AGGAGTGACAGAGTTAGACTCTTTTTTTTTTTTTGAGACAGAGTCTCGCTCTGTCAGTCAGGC	chr18 - 68584348 68584412	space
mir-6788	GACGGCTGGGAGAAGCGGGGTGAAGAAGAGTATTGATTGTGCTGTTCGCCACTTCCCTCCCTGCAG	....((.(((((..(.((((((..(((.(((((.....))))).)))..)))))))))))).))..	chr18 + 72889791 72889857	intron	96.97	0	-26.1	no		Primates	b, c		mir-6788	intron	96.97	A	0		Primates	anotation	GACGGCTGGGAGAAGCGGGGTGAAGAAGAGTATTGATTGTGCTGTTCGCCACTTCCCTCCCTGCAG	chr18 + 72889791 72889857	intron
mir-4526	CGCGGTGACATCAGGGCCCGGTCCCTGCTGTCGTGCCCCAGGTGACGCGCCCGGGCTGACAGCAGGGCTGGCCGCTGACGTCACTGTC	.((((((((.((((((((.((.(((((((((((.((((..((((...)))).))))))))))))))))))))).)))).)))))))).	chr18 + 74568248 74568336	intron	93.1	0	-61.4	no	mir-4526	Primates	b		mir-4526	intron	93.1	A	0	mir-4526	Primates		CGCGGTGACATCAGGGCCCGGTCCCTGCTGTCGTGCCCCAGGTGACGCGCCCGGGCTGACAGCAGGGCTGGCCGCTGACGTCACTGTC	chr18 + 74568248 74568336	intron
mir-3156-2	TGCAGAAGAAAGATGTGGAAGTGAGAGACACTTTCACTATATATAGTGGCTCCCACTTCCAGATCTTTCTCTCTGTG	.(((((((((((((.((((((((.(((.((((............)))).))).)))))))).)))))))).))))).	chr18 + 75687740 75687817	space	96.1	0	-38.5	no	mir-3156	Primates	b, c		mir-3156-2	space	96.1	A	0	mir-3156	Primates	anotation	TGCAGAAGAAAGATGTGGAAGTGAGAGACACTTTCACTATATATAGTGGCTCCCACTTCCAGATCTTTCTCTCTGTG	chr18 + 75687740 75687817	space
mir-3187	GCTGGCCCTGGGCAGCGTGTGGCTGAAGGTCACCATGTTCTCCTTGGCCATGGGGCTGCGCGGGGCCAGC	((((((((((.(((((.(((((((.((((............)))))))))))..))))).))))))))))	chr19 + 570991 571061	space	100	0	-46.1	no		Primates	b, c		mir-3187	space	100	A	0		Primates	anotation	GCTGGCCCTGGGCAGCGTGTGGCTGAAGGTCACCATGTTCTCCTTGGCCATGGGGCTGCGCGGGGCCAGC	chr19 + 570991 571061	space
mir-1905c	GGTGTGTGTCCGCTGCTGGATGCGCTTGATGGTGGCGCCCTTAGGCCCCACCACCAGCCCCACCACCCGGTAGGGCACGCGCA	.((((((((((((((.(((.((.(((.(.((((((.(((....))).))))))).)))..)))))..)))).)))))))))).	chr19 + 1356708 1356791	space	93.98	1	-42.3	no	mir-1905	Vertebrates	c		mir-1905c	space	93.98	B	0	mir-1905	Vertebrata	anotation	GGTGTGTGTCCGCTGCTGGATGCGCTTGATGGTGGCGCCCTTAGGCCCCACCACCAGCCCCACCACCCGGTAGGGCACGCGCA	chr19 + 1356708 1356791	space
mir-1227	GTGGGGCCAGGCGGTGGTGGGCACCGCTGGGGTGGGCACAGCAGCCATGCAGAGCAGGCAGCTGACCCCGTGCCACCCTCTTCCCCAG	.(((((...(((((((.....)))))))(((((((.((((((.(((.(((...)))))).)))......))))))))))...))))).	chr19 - 2102695 2102783	intron	98.86	0	-43.2	no	mir-1227	Primates	a, b		mir-1227	intron	98.86	A	0	mir-1227	Primates	Ref1 Ref2	GTGGGGCCAGGCGGTGGTGGGCACCGCTGGGGTGGGCACAGCAGCCATGCAGAGCAGGCAGCTGACCCCGTGCCACCCTCTTCCCCAG	chr19 - 2102695 2102783	intron
mir-6789	CGAGGTAGGGGCGTCGAGGGCGCGCGGGCGGGTCCCAGGCTGGGGCCCCGCGGAGGCCGGGTGCTCACTGCTCCGTCCCGGCGCCCGTGTCTCCTCCAG	.((((((.((((((((.(((((.((((((((((((((...))))).))))).(((........))).))))..))))))))))))).))))))......	chr19 - 2104430 2104529	intron	95.92	0	-55.8	no		Primates	b, c		mir-6789	intron	95.92	A	0		Primates	anotation	CGAGGTAGGGGCGTCGAGGGCGCGCGGGCGGGTCCCAGGCTGGGGCCCCGCGGAGGCCGGGTGCTCACTGCTCCGTCCCGGCGCCCGTGTCTCCTCCAG	chr19 - 2104430 2104529	intron
mir-7850	GGTCAGAAGTTTGGACATAGTGTGGCTGGGTCCTCTGTGCAGGGTCTTACCCAGCCACACTACATCCAAACTTCTGACC	(((((((((((((((..((((((((((((((.((((....))))....))))))))))))))..)))))))))))))))	chr19 + 2547824 2547903	space	100	0	-54.6	no		Primates	b, c		mir-7850	space	100	A	0		Primates	anotation	GGTCAGAAGTTTGGACATAGTGTGGCTGGGTCCTCTGTGCAGGGTCTTACCCAGCCACACTACATCCAAACTTCTGACC	chr19 + 2547824 2547903	space
mir-8804	CTTGGCGGTCAGGTGGGGGCCCACGGCCTGGTGCAGCAGGTCGCGGCACTCGAGCAGCCCGGCGGCCAGCACGCGCCGGTCGAAGGTGAAGTCCACCTGCTGGAAGCTGACGG	(((..(((.(((((((..(((..(((((.(((((.((.(((((((((.........)))..)))))).))..))))))))))..))).....)))))))))).))).......	chr19 - 4735176 4735289	intron	95.58	0	-51.8	no		Mammals	b, c		mir-8804	intron	95.58	A	0		Mammalia	anotation	CTTGGCGGTCAGGTGGGGGCCCACGGCCTGGTGCAGCAGGTCGCGGCACTCGAGCAGCCCGGCGGCCAGCACGCGCCGGTCGAAGGTGAAGTCCACCTGCTGGAAGCTGACGG	chr19 - 4735176 4735289	intron
mir-7-3	AGATTAGAGTGGCTATGGTCTAGTGCTGTGTGGAAGACTAGTGATTTTGTTGTTCTGATGTGCTACGACAACAAGTCACAGCCGGCCTCATAGCGCAGACTCCCTTCGAC	......(((.((....(((((.((((((((.((..(.((.(((((((.((((((.((......)).))))))))))))))).)..)).))))))))))))))).)))...	chr19 + 4868374 4868484	space	99.09	0	-38	yes	mir-7	Vertebrates	a, b		mir-7-3	space	99.09	A	5	mir-7	Vertebrata	Ref1	AGATTAGAGTGGCTATGGTCTAGTGCTGTGTGGAAGACTAGTGATTTTGTTGTTCTGATGTGCTACGACAACAAGTCACAGCCGGCCTCATAGCGCAGACTCCCTTCGAC	chr19 + 4868374 4868484	space
mir-6790	AGTGAGTGTGGATTTGGCGGGGTTCCGGGGTCCCGACGGCGACCTCGGCAACTCCTCACTCACCGT	.(((((((.(((.(((.((((((((((.........))).))))))).))).))).)))))))...	chr19 - 6568826 6568892	intron	100	0	-35.6	yes	mir-6790	Primates	a, b		mir-6790	intron	100	A	1	mir-6790	Primates	Ref1	AGTGAGTGTGGATTTGGCGGGGTTCCGGGGTCCCGACGGCGACCTCGGCAACTCCTCACTCACCGT	chr19 - 6568826 6568892	intron
mir-3940	GACCACGCCAAGCAGCTTATCGAGGAGAAGATCGAGGTGGGTTGGGGCGGGCTCTGGGGGTTTGGGCTCGCAGCCCAGATCCCAGCCCACTCACCTCGGCTACTCTCCTTCCT	......((......)).....(((((((((.(((((((((((......(((((...((((((((((((...))))))))))))))))))))))))))))))..)))))))...	chr19 - 6590056 6590169	overlap	94.69	1	-56.1	no	mir-3940	Primates	b		mir-3940	overlap	94.69	B	0	mir-3940	Primates		GACCACGCCAAGCAGCTTATCGAGGAGAAGATCGAGGTGGGTTGGGGCGGGCTCTGGGGGTTTGGGCTCGCAGCCCAGATCCCAGCCCACTCACCTCGGCTACTCTCCTTCCT	chr19 - 6590056 6590169	overlap
mir-4999	ATAGAAAATAAAACACATACTGCCGTATTGTCAGGTAGTGATAGGATTTATCACTACCTGACAATACAATATGTGTTTGTTTTATTTTATGT	....(((((((((((.((((....(((((((((((((((((((.....))))))))))))))))))).....)))).)))))))))))....	chr19 - 8768915 8769007	intron	95.6	1	-42.2	yes		Primates	b		mir-4999	intron	95.6	B	2		Primates	novel	ATAGAAAATAAAACACATACTGCCGTATTGTCAGGTAGTGATAGGATTTATCACTACCTGACAATACAATATGTGTTTGTTTTATTTTATGT	chr19 - 8768915 8769007	intron
mir-4322	ACCGCGAGTTCCGCGCCTGCCCGAGTCGCCCCACGCGGGGGACCGTGGGCTCAGCGCGTGGCGCCCGGAGCAT	.(((.(.((.(((((((((((((.(((.((((....)))))))..)))))..)).)))))).)))))).....	chr19 + 10496441 10496514	space	93.15	2	-36.7	no		Primates	b, c		mir-4322	space	93.15	C	0		Primates	anotation	ACCGCGAGTTCCGCGCCTGCCCGAGTCGCCCCACGCGGGGGACCGTGGGCTCAGCGCGTGGCGCCCGGAGCAT	chr19 + 10496441 10496514	space
mir-1181	TCCAGCGCCGCCGCCGTCGCCGCCAACCGAGCCGTAGCGGGCTGGGCCGCCAAGGCAAGATGGTGGACTACAGCGTGTGGG	.(((((((..(((((((((((((...((.((((......)))).))..))...)))..))))))))......)))).))).	chr19 - 10688915 10688996	intron	93.83	1	-35.8	no	mir-1181	Primates	b, c		mir-1181	intron	93.83	B	0	mir-1181	Primates	anotation	TCCAGCGCCGCCGCCGTCGCCGCCAACCGAGCCGTAGCGGGCTGGGCCGCCAAGGCAAGATGGTGGACTACAGCGTGTGGG	chr19 - 10688915 10688996	intron
mir-4748	TGACTGGCTAAGGTTTGGGGAGGATTTGCTGGTGCTAAAGAGGAAAGCAGACCCTACCCAACCCCACACCCTACTACAGCCA	....(((((..(((.((((((((.((((((..(.((....)).).)))))).)))......))))).))).......)))))	chr19 + 11080372 11080454	intron	95.12	0	-24.6	no		Primates	b		mir-4748	intron	95.12	A	0		Primates		TGACTGGCTAAGGTTTGGGGAGGATTTGCTGGTGCTAAAGAGGAAAGCAGACCCTACCCAACCCCACACCCTACTACAGCCA	chr19 + 11080372 11080454	intron
mir-3604-1	CCCAGCCTAACCAATGTGCAGACTACTGTACACGTTGAGAGCCTCCTGAACAGGTAGTCTGAACACTGGGTTGGCAAGG	((..(((...(((.(((.(((((((((......(((.((......)).))).))))))))).))).)))...)))..))	chr19 + 11115823 11115902	intron	94.87	0	-27.8	no	mir-3604	Mammals	a, b		mir-3604-1	intron	94.87	A	0	mir-3604	Mammalia	Ref2	CCCAGCCTAACCAATGTGCAGACTACTGTACACGTTGAGAGCCTCCTGAACAGGTAGTCTGAACACTGGGTTGGCAAGG	chr19 + 11115823 11115902	intron
mir-199a-1	GCCAACCCAGTGTTCAGACTACCTGTTCAGGAGGCTCTCAACGTGTACAGTAGTCTGCACATTGGTTAGGC	(((...(((((((.((((((((.(((.((.(..(....)..).)).))))))))))).)))))))...)))	chr19 - 11115827 11115898	space	100	0	-29.4	yes	mir-199	Vertebrates	a, b		mir-199a-1	space	100	A	4	mir-199	Vertebrata	Ref1	GCCAACCCAGTGTTCAGACTACCTGTTCAGGAGGCTCTCAACGTGTACAGTAGTCTGCACATTGGTTAGGC	chr19 - 11115827 11115898	space
mir-7974	CTGGGGCAGGGCTCGGCCCCCACGGTGAAACGGCCGCCTAAACCACCCAGGCCTTATGGCTCCATAGGCTGTGATGCTCTCCTGAGCCCTGGCTAAGCT	...((.((((((((((....((((((.....((((((((.........)))).....))))......))))))........)))))))))).)).....	chr19 - 11831966 11832065	intron	96.2	0	-36.3	no		Primates	b, c		mir-7974	intron	96.2	A	0		Primates	anotation	GCTCGGCCCCCACGGTGAAACGGCCGCCTAAACCACCCAGGCCTTATGGCTCCATAGGCTGTGATGCTCTCCTGAGCCC	chr19 - 11831976 11832055	intron
mir-5684	GCTGAACTCTAGCCTGAGCAACAGAGTGAGATGGTCTTGCTTTGTTGCCCAGGCTGGAGTCCAGT	((((.(((((((((((.((((((((((((((...)))))))))))))).))))))))))).))))	chr19 + 13008470 13008535	space	98.46	0	-44.3	no		Primates	b		mir-5684	space	98.46	A	0		Primates		GCTGAACTCTAGCCTGAGCAACAGAGTGAGATGGTCTTGCTTTGTTGCCCAGGCTGGAGTCCAGT	chr19 + 13008470 13008535	space
mir-6794	CAGGGGGACTGGGGGTGAGCAGGCACAGACCCCAGCTCGTGCTCACTCTCGGTCCCTCCCTA	..((((((((((((((((((((((..........)))..)))))))))))))))))))....	chr19 + 13076243 13076305	intron	100	0	-37.5	no	mir-6794	Primates	a, b		mir-6794	intron	100	A	0	mir-6794	Primates	Ref1	CAGGGGGACTGGGGGTGAGCAGGCACAGACCCCAGCTCGTGCTCACTCTCGGTCCCTCCCTA	chr19 + 13076243 13076305	intron
mir-3074-2	CAGGCTCCAAGGGGGCTTGACTCCTGTTCCTGCTGAACTGAGCCAGTGTGCACAAACCAACTGTGTTTCAGCTCAGTAGGCACGGGAGGCAGAGCCCAGGGAGGCCA	..((((((....((((((..(((((((.((((((((.((((((((((((......))..)))).).))))).)))))))).)))))))...))))))..))).))).	chr19 + 14166258 14166365	intron	96.26	0	-56.4	yes	mir-3074	Mammals	b		mir-3074-2	intron	96.26	A	5	mir-3074	Mammalia		CAGGCTCCAAGGGGGCTTGACTCCTGTTCCTGCTGAACTGAGCCAGTGTGCACAAACCAACTGTGTTTCAGCTCAGTAGGCACGGGAGGCAGAGCCCAGGGAGGCCA	chr19 + 14166258 14166365	intron
mir-24-2	CTCTGCCTCCCGTGCCTACTGAGCTGAAACACAGTTGGTTTGTGCACACTGGCTCAGTTCAGCAGGAACAGGA	.......(((.((.(((.(((((((((....((((..((....))..))))..))))))))).))).)).)))	chr19 - 14166279 14166352	space	100	0	-26	yes	mir-24	Vertebrates	a, b		mir-24-2	space	100	A	1	mir-24	Vertebrata	Ref1 Ref2	CTCTGCCTCCCGTGCCTACTGAGCTGAAACACAGTTGGTTTGTGCACACTGGCTCAGTTCAGCAGGAACAGGA	chr19 - 14166279 14166352	space
mir-27a	CTGAGGAGCAGGGCTTAGCTGCTTGTGAGCAGGGTCCACACCAAGTCGTGTTCACAGTGGCTAAGTTCCGCCCCCCAG	(((.((.((.(((((((((((((.(((((((.((.(........))).)))))))))))))))))))).)).)).)))	chr19 - 14166432 14166510	space	100	0	-37.8	yes	mir-27	Vertebrates	a, b		mir-27a	space	100	A	1	mir-27	Vertebrata	Ref1	CTGAGGAGCAGGGCTTAGCTGCTTGTGAGCAGGGTCCACACCAAGTCGTGTTCACAGTGGCTAAGTTCCGCCCCCCAG	chr19 - 14166432 14166510	space
mir-23a	GGCCGGCTGGGGTTCCTGGGGATGGGATTTGCTTCCTGTCACAAATCACATTGCCAGGGATTTCCAACCGACC	((.(((.((((((((((((.((((.((((((..........)))))).)))).))))))).))))).))).))	chr19 - 14166577 14166650	space	100	0	-33.3	yes	mir-23	Vertebrates	a, b		mir-23a	space	100	A	1	mir-23	Vertebrata	Ref1	GGCCGGCTGGGGTTCCTGGGGATGGGATTTGCTTCCTGTCACAAATCACATTGCCAGGGATTTCCAACCGACC	chr19 - 14166577 14166650	space
mir-181c	CGGAGAATTTGCCAAGGGTTTGGGGGAACATTCAACCTGTCGGTGAGTTTGGGCAGCTCAGGCAAACCATCGACCGTTGAGTGGACCCTGAGACCTGGACTTGCCATCCT	.(((......((((..(((((.((((..((((((((..(((((((.(((((...........)))))))))))).))))))))..)))).)))))))).)......))).	chr19 + 14206540 14206650	intron	100	0	-46.9	yes	mir-181	Vertebrates	a, b		mir-181c	intron	100	A	1	mir-181	Vertebrata	Ref1	CGGAGAATTTGCCAAGGGTTTGGGGGAACATTCAACCTGTCGGTGAGTTTGGGCAGCTCAGGCAAACCATCGACCGTTGAGTGGACCCTGAGACCTGGACTTGCCATCCT	chr19 + 14206540 14206650	intron
mir-181d	GTCCCCTCCCCTAGGCCACAGCCAAGGTCACAATCAACATTCATTGTTGTCGGTGGGTTGTGAGGACCGAGGCCAGACCCACCGGGGGATGAATGTCACTGTGGCTGGGCCAGACACGGCTTAAGGGGAATGGGGAC	(((((((((((((((((...(((..(((((((....(((((((((....((((((((((.((.(........)))))))))))))..)))))))))...))))))).))).......))))).))))))..))))))	chr19 + 14206716 14206853	intron	100	0	-68.1	yes	mir-181	Vertebrates	a, b		mir-181d	intron	100	A	1	mir-181	Vertebrata	Ref1	GTCCCCTCCCCTAGGCCACAGCCAAGGTCACAATCAACATTCATTGTTGTCGGTGGGTTGTGAGGACCGAGGCCAGACCCACCGGGGGATGAATGTCACTGTGGCTGGGCCAGACACGGCTTAAGGGGAATGGGGAC	chr19 + 14206716 14206853	intron
mir-8994	GGGCGAGGTGTCGTGGTAGTTGGCGGTATTGATGACCGTCTCCCCGCTCTTGATGCGCGTCCGCAGGTCATACTTGACGATGTTGCGCGTGCGCTCCTTGTTGTAGAAGACGGCACCATCATAGACCACAAAGCCTGTGCCATCC	.((((((((...(((((...(((.(((......(.((((((....((.(..(..(((((.((((((((((....))))....))))).))))))..)..)..))...)))))))))).)))...)))))...)))).))))....	chr19 + 14522034 14522179	space	93.1	1	-49.3	no		Mammals	b, c		mir-8994	space	93.1	B	0		Mammalia	anotation	GGGCGAGGTGTCGTGGTAGTTGGCGGTATTGATGACCGTCTCCCCGCTCTTGATGCGCGTCCGCAGGTCATACTTGACGATGTTGCGCGTGCGCTCCTTGTTGTAGAAGACGGCACCATCATAGACCACAAAGCCTGTGCCATCC	chr19 + 14522034 14522179	space
mir-9307	CAGACTGGTGCTCCGACTCGTGTGTCGAGGTGGGCTCCAGCACCTTCTGCAGGGTCCCTGGGCACACGAAGACT	.....(((....)))..(((((((((.(((..(((.((.(((.....))).)))))))).))))))))).....	chr19 + 14522330 14522404	space	97.3	0	-29	no		Mammals	b, c		mir-9307	space	97.3	A	0		Mammalia	anotation	CAGACTGGTGCTCCGACTCGTGTGTCGAGGTGGGCTCCAGCACCTTCTGCAGGGTCCCTGGGCACACGAAGACT	chr19 + 14522330 14522404	space
mir-639	TGGCCGACGGGGCGCGCGCGGCCGGGAGGGGCGGGGCGGACGCACAGCCGCGTTTAGTCTAGCGCAGCGGTCGCGAGCGCTCTGGGTATCCTGTCCTG	..(((..((((((((.((((((((....(.((.((((((((((......)))))).)))).)).)..)))))))).)))))))))))...........	chr19 + 14922789 14922887	intron	100	0	-50.5	no	mir-639	Primates	a		mir-639	intron	100	A	0	mir-639	Primates	Ref1	TGGCCGACGGGGCGCGCGCGGCCGGGAGGGGCGGGGCGGACGCACAGCCGCGTTTAGTCTAGCGCAGCGGTCGCGAGCGCTCTGGGTATCCTGTCCTG	chr19 + 14922789 14922887	intron
mir-1470	GTCCTCCGCCCGTGCACCCCGGGGCGGGAGACCCCGCGGGACGCACCGAGGTAGGGGGGAC	(((((((((((((((..((((.((.((....)))).))))..))).)).)))..)))))))	chr19 + 15755154 15755215	space	95.08	1	-36.8	no		Primates	b, c		mir-1470	space	95.08	B	0		Primates	anotation	GTCCTCCGCCCGTGCACCCCGGGGCGGGAGACCCCGCGGGACGCACCGAGGTAGGGGGGAC	chr19 + 15755154 15755215	space
mir-1239	GTGGGTGGGCAGGTGGGTGGGAAGCCCTGGGACGCTGCCTCCTCTCTCCTGGGGCCTCTCTCGGGCTGGGGGCTGGTCTCAGTTTCCCCATTCTGCCTGGCCTAG	..((.((((((((((((.((((....(((((((.(.((((((.....((((((......))))))..)))))).)))))))))))))))).)))))))).))...	chr19 + 18515597 18515702	intron	100	0	-53.4	no		Cercopithecidae	a, b		mir-1239	intron	100	A	0		Cercopithecidae	Ref1	GTGGGTGGGCAGGTGGGTGGGAAGCCCTGGGACGCTGCCTCCTCTCTCCTGGGGCCTCTCTCGGGCTGGGGGCTGGTCTCAGTTTCCCCATTCTGCCTGGCCTAG	chr19 + 18515597 18515702	intron
mir-3188	TGGATAAATAACTCCTTGGCGCCTCCTGCTCTGCTGTGCTGCCAGCGCCTCCCCTAGCGCGCCTTCTGGAGGGGCTTTGTGCGGACTTGGGGCTGGAGGCCTGGTGGGGCT	...........((((((((.((((((.((((((..((.(((((((.(((.((.((((........)))).))))).))).)))))).)))))).)))))))))).))))..	chr19 + 18702774 18702885	intron	93.69	2	-47.1	no	mir-3188	Primates	b		mir-3188	intron	93.69	C	0	mir-3188	Primates		TGGATAAATAACTCCTTGGCGCCTCCTGCTCTGCTGTGCTGCCAGCGCCTCCCCTAGCGCGCCTTCTGGAGGGGCTTTGTGCGGACTTGGGGCTGGAGGCCTGGTGGGGC	chr19 + 18702774 18702885	intron
mir-3189	GCCTCAGTTGCCCCGTCTGTGCCCTGGGTAGGAACGTCCTGGACCCCCTTGGGTCTGATGGGGTAGCTGATGC	((.((((((((((((((.(.((((.((((((((...)))))....)))..))))).)))))))))))))).))	chr19 + 18824032 18824105	intron	93.15	0	-40.8	no		Primates	b		mir-3189	intron	93.15	A	0		Primates		GCCTCAGTTGCCCCGTCTGTGCCCTGGGTAGGAACGTCCTGGACCCCCTTGGGTCTGATGGGGTAGCTGATGC	chr19 + 18824032 18824105	intron
mir-640	GTGACCCTGGGCAAGTTCCTGAAGATCAAACACATCAGATCCCTTATCTGTAAAATGGGCATGATCCAGGAACCTGCCTCTATGGTTGCCTTGGAG	((((((..(((((.(((((((..(((((....((((((((.....)))))....)))....)))))))))))).)))))....)))))).......	chr19 + 19944455 19944551	intron	100	0	-32.9	no	mir-640	Primates	a, b		mir-640	intron	100	A	0	mir-640	Primates	Ref1	GTGACCCTGGGCAAGTTCCTGAAGATCAAACACATCAGATCCCTTATCTGTAAAATGGGCATGATCCAGGAACCTGCCTCTATGGTTGCCTTGGAG	chr19 + 19944455 19944551	intron
mir-1270	CATAATGTTATACTGGAGAGCAGGAAGAGCTGTGTTGGGTATAAGTAACAGGCTTTTCTTTATCTTCTATGTGACTCTTTGCA	......((((((..(((((..((((((((((.(((((........)))))))))))))))..)))))..))))))........	chr19 - 20827871 20827954	intron	93.98	0	-26.5	no	mir-1270	Primates	c		mir-1270	intron	93.98	A	0	mir-1270	Primates	anotation	CATAATGTTATACTGGAGAGCAGGAAGAGCTGTGTTGGGTATAAGTAACAGGCTTTTCTTTATCTTCTATGTGACTCTTTGCA	chr19 - 20827871 20827954	intron
mir-684-1	GCTGCTACATGTAGGGCAATCTGTCTTTAAGTAGGGATAAATTACTCTAAAACAAAAAAGAATCCTAGATAGTTTTCCCTTCAAGTCAAGCATCTTGTTGTTTAAACA	(((...((.((.((((.((.((((((.......(((((.......................))))))))))).)).)))).)).))..)))....((((.....))))	chr19 - 21537553 21537661	intron	94.19	0	-19.9	no	mir-684	Mammals	b		mir-684-1	intron	94.19	A	0	mir-684	Mammalia		GTAGGGCAATCTGTCTTTAAGTAGGGATAAATTACTCTAAAACAAAAAAGAATCCTAGATAGTTTTCCCTTCAAGTCAAGCATCTTGT	chr19 - 21537563 21537651	intron
mir-4707	GGTTCCGGAACCCCGGCGCGGGCGGATTCTGGGGTGTAGACGCTGCTGACCAGCCCACCCCAGCCGAGGTTCTCCGCACC	(((..(((((((.((((..(((.((...((((...((((...))))...)))).)).)))..)))).)))..)))).)))	chr19 + 28661860 28661940	5UTR	93.75	1	-35.3	no		Primates	a, b		mir-4707	5utr	93.75	B	0		Primates	Ref2	GGTTCCGGAACCCCGGCGCGGGCGGATTCTGGGGTGTAGACGCTGCTGACCAGCCCACCCCAGCCGAGGTTCTCCGCACC	chr19 + 28661860 28661940	5UTR
mir-6887	GAGGATGGGGGGACGGATGGAGAGGACATAGCCTGGCACTGAGGTCCCCTCCACTTTCCTCCTAG	.....((((((((.((.(((((.((((.(((.......)))..)))).))))))).)))))))).	chr19 + 35564566 35564631	intron	93.85	0	-28.4	no		Primates	b		mir-6887	intron	93.85	A	0		Primates		GAGGATGGGGGGACGGATGGAGAGGACATAGCCTGGCACTGAGGTCCCCTCCACTTTCCTCCTAG	chr19 + 35564566 35564631	intron
mir-5196	TCTGGGGAGACCTGGGCTGTCAGAGGCCAGGGAAGGGGACGAGGGTTGGGTAACAGGTGGTTAGCACTTCACCCTCGTCTCCCTCCCAGGTTAGAAGGACCCCCCTCTCTGAAGG	.((..(((((...(((((.((...((((.((((.((((((((((((.((.((((.....)))).).)...)))))))))))).)))).)))).)).)).)))...)))))..)).	chr19 + 35807295 35807410	intron	96.52	0	-52.4	no		Primates	b, c		mir-5196	intron	96.52	A	0		Primates	anotation	TCTGGGGAGACCTGGGCTGTCAGAGGCCAGGGAAGGGGACGAGGGTTGGGTAACAGGTGGTTAGCACTTCACCCTCGTCTCCCTCCCAGGTTAGAAGGACCCCCCTCTCTGAAGG	chr19 + 35807295 35807410	intron
mir-7176	ACCCGGAGTGGAGGGGACAGGGGCCCAGCCAAACCCTCAGTCCCAGTTCCTACCACTCCTGGCCA	.((.(((((((.((((((.(((((..((.......))..))))).)))))).))))))).))...	chr19 - 36005773 36005838	intron	98.46	0	-32.7	no		Cercopithecidae	a, b		mir-7176	intron	98.46	A	0		Cercopithecidae	Ref1	ACCCGGAGTGGAGGGGACAGGGGCCCAGCCAAACCCTCAGTCCCAGTTCCTACCACTCCTGGCCA	chr19 - 36005773 36005838	intron
mir-1244-1	TCTTATTCTGAGCATTCCAGTAACTTTTTTGTGTATGTACTTAGCTGTACTATAAGCAGTTGGTTTGTATGAGATGGTTAAAAA	........(((.((((.((..((((...((((.(((((((......)))).))).))))..))))....)).)))).)))....	chr19 - 37550269 37550353	intron	98.81	1	-14.8	no	mir-1244	Mammals	a, b		mir-1244-1	intron	98.81	B	0	mir-1244	Mammalia	Ref2	TCTTATTCTGAGCATTCCAGTAACTTTTTTGTGTATGTACTTAGCTGTACTATAAGCAGTTGGTTTGTATGAGATGGTTAAAAA	chr19 - 37550269 37550353	intron
mir-641	CAGGCTGGGTGAAAGGAAGGAAAGACATAGGATAGAGTCACCTCTGTCCTCTGTCCTCCACCTATAGAGGTGACTATCCTATGTCTTTCCTTCCTCTCACCCCTGAGTCTCA	.(((((((((((.((((((((((((((((((((..((((((((((((....((.....))...)))))))))))))))))))))))))))))))).))))))...)))))..	chr19 - 40757992 40758104	intron	96.43	0	-67.2	yes	mir-641	Primates	b, c		mir-641	intron	96.43	A	1	mir-641	Primates	anotation	CAGGCTGGGTGAAAGGAAGGAAAGACATAGGATAGAGTCACCTCTGTCCTCTGTCCTCCACCTATAGAGGTGACTATCCTATGTCTTTCCTTCCTCTCACCCCTGAGTCTCA	chr19 - 40757992 40758104	intron
mir-6796	TTACCTTGTGGGGTTGGAGAGCTGGCTGGTCCAGCCCCTCAGACGCTCTCCCCTCCCTGCAG	......(((((((..(((((((.(((((...)))))........)))))))...))))))).	chr19 + 40850474 40850536	intron	96.77	0	-27	no		Primates	b, c		mir-6796	intron	96.77	A	0		Primates	anotation	TTACCTTGTGGGGTTGGAGAGCTGGCTGGTCCAGCCCCTCAGACGCTCTCCCCTCCCTGCAG	chr19 + 40850474 40850536	intron
mir-6797	CAACCAGGAGGGAGAGGGCTGAAAACAGGACCTGTGCTCACGGGGGCCTGCATGACCCTTCCCTCCCCACAG	......(((((((.(((((((....((((.(((.((....)).))))))))).).)))))))))))......	chr19 + 42365788 42365860	intron	93.06	0	-30.1	no		Primates	b, c		mir-6797	intron	93.06	A	0		Primates	anotation	CAACCAGGAGGGAGAGGGCTGAAAACAGGACCTGTGCTCACGGGGGCCTGCATGACCCTTCCCTCCCCACAG	chr19 + 42365788 42365860	intron
mir-4323	CGGAGCCCAGGCGGGCAGGTGGGGTGTCTGGAGACGCCAGGCAGCCCCACAGCCTCAGACCTCAGGACC	.((..(..((((((((..(((((((((((((.....))))))).)))))).))))..).)))..)..))	chr19 - 42642997 42643066	intron	94.2	0	-33.1	no		Primates	b		mir-4323	intron	94.2	A	0		Primates		CGGAGCCCAGGCGGGCAGGTGGGGTGTCTGGAGACGCCAGGCAGCCCCACAGCCTCAGACCTCAGGAC	chr19 - 42642997 42643066	intron
mir-8077	GTGGGGCAGGGGGTGGGATAGGCACTGGGATCCCAAAGGAGATGGCTGAGTGGGGTTCTGACTCCTCTGCCCAAC	...(((((((((((.(((....((((.(((((((...)).)))..)).))))....))).)).)))))))))...	chr19 + 42875771 42875846	intron	93.33	0	-34.8	no		Primates	b, c		mir-8077	intron	93.33	A	0		Primates	anotation	GTGGGGCAGGGGGTGGGATAGGCACTGGGATCCCAAAGGAGATGGCTGAGTGGGGTTCTGACTCCTCTGCCCAAC	chr19 + 42875771 42875846	intron
mir-8085	CTAGGAGGGATAGAAGGAGAGAGGGCTGTGAGGCAGGGGTGGCTCTATGGTGACGCCCATCTTCCTAC	..............((((.(((((((.((.(...((((....))))....).)))))).)))))))..	chr19 + 45492910 45492978	intron	95.38	2	-18.9	no		Primates	b		mir-8085	intron	95.38	C	0		Primates		CTAGGAGGGATAGAAGGAGAGAGGGCTGTGAGGCAGGGGTGGCTCTATGGTGACGCCCATCTTCCTAC	chr19 + 45492910 45492978	intron
mir-330	CTTTGGCGATCACTGCCTCTCTGGGCCTGTGTCTTAGGCTCTGCAAGATCAACCGAGCAAAGCACACGGCCTGCAGAGAGGCAGCGCTCTGCCC	....(((((.(.(((((((((((((((((((.(((..((((.............)))).))))))).))))..))))))))))).).)).))).	chr19 - 46462074 46462168	intron	100	0	-46.9	yes	mir-330	Mammals	a, b		mir-330	intron	100	A	1	mir-330	Mammalia	Ref1	CTTTGGCGATCACTGCCTCTCTGGGCCTGTGTCTTAGGCTCTGCAAGATCAACCGAGCAAAGCACACGGCCTGCAGAGAGGCAGCGCTCTGCCC	chr19 - 46462074 46462168	intron
mir-642	ATCTGAGCTGGGAGGGTCCCTCTCCAAATGTGTCTTGGGGTGGGGGATCAAGACACATTTGGAGAGGGAACCTCCCAACTCGGCCTC	..(((((.(((((((.((((((((((((((((((((((.........)))))))))))))))))))))).))))))).)))))....	chr19 + 46491310 46491397	intron	100	0	-61.1	no	mir-642	Primates	a		mir-642	intron	100	A	0	mir-642	Primates	Ref1	ATCTGAGCTGGGAGGGTCCCTCTCCAAATGTGTCTTGGGGTGGGGGATCAAGACACATTTGGAGAGGGAACCTCCCAACTCGGCCTC	chr19 + 46491310 46491397	intron
mir-642b	GAGTTGGGAGGTTCCCTCTCCAAATGTGTCTTGATCCCCCACCCCAAGACACATTTGGAGAGGGACCCTCCCAGCTC	(((((((((((.(((((((((((((((((((((...........))))))))))))))))))))).)))))))))))	chr19 - 46491314 46491391	space	98.7	0	-60.2	no	mir-642	Primates	b, c		mir-642b	space	98.7	A	0	mir-642	Primates	anotation	GAGTTGGGAGGTTCCCTCTCCAAATGTGTCTTGATCCCCCACCCCAAGACACATTTGGAGAGGGACCCTCCCAGCTC	chr19 - 46491314 46491391	space
mir-703	TAAAACCTTCAAAAGGAAAGGAGAATGTTTTGTGGACCACTTTGGTTTTCTTTTTTGCGTGTGGCAGTTTTA	((((((((.((...((((((((((((.....(((...)))....))))))))))))...)).))..))))))	chr19 - 46947559 46947631	space	98.44	1	-14.5	no	mir-703	Vertebrates	b		mir-703	space	98.44	B	0	mir-703	Vertebrata		TAAAACCTTCAAAAGGAAAGGAGAATGTTTTGTGGACCACTTTGGTTTTCTTTTTTGCGTGTGGCAGTTTTA	chr19 - 46947559 46947631	space
mir-320e	CTCCATGGGGCTTTCTCTTCCCAGTTCTTCCTGGAGTCGGGGAAAAGCTGGGTTGAGAGGGTGAACAGAAAAA	.....((..((((((((..(((((((.(((((.(...).))))).)))))))..))))))))...))......	chr19 - 47476801 47476874	intron	95.89	1	-30.9	yes	mir-320	Vertebrates	b, c		mir-320e	intron	95.89	B	2	mir-320	Vertebrata	anotation	CTCCATGGGGCTTTCTCTTCCCAGTTCTTCCTGGAGTCGGGGAAAAGCTGGGTTGAGAGGGTGAACAGAAAAA	chr19 - 47476801 47476874	intron
mir-3190	CTGGGGTCACCTGTCTGGCCAGCTACGTCCCCACGGCCCTTGTCAGTGTGGAAGGTAGACGGCCAGACAGGTGACCCCTGG	..((((((((((((((((((..((((.(((.((((((....))).))).)))..))))..))))))))))))))))))...	chr19 + 48021604 48021685	space	98.75	0	-56.9	no	mir-3190	Primates	b, c		mir-3190	space	98.75	A	0	mir-3190	Primates	anotation	CTGGGGTCACCTGTCTGGCCAGCTACGTCCCCACGGCCCTTGTCAGTGTGGAAGGTAGACGGCCAGACAGGTGACCCCTGG	chr19 + 48021604 48021685	space
mir-3191	GGGGTCACCTGTCTGGCCGTCTACCTTCCACACTGACAAGGGCCGTGGGGACGTAGCTGGCCAGACAGGTGACCCC	(((((((((((((((((((.((((.((((.(((.(.(....)).))))))).)))).)))))))))))))))))))	chr19 - 48021606 48021682	intron	98.68	0	-54.5	yes	mir-3190	Primates	b, c		mir-3191	intron	98.68	A	1	mir-3190	Primates	anotation	GGGGTCACCTGTCTGGCCGTCTACCTTCCACACTGACAAGGGCCGTGGGGACGTAGCTGGCCAGACAGGTGACCCC	chr19 - 48021606 48021682	intron
mir-150	CTCCCCATGGCCCTGTCTCCCAACCCTTGTACCAGTGCTGGGCTCAGACCCTGGTACAGGCCTGGGGGACAGGGACCTGGGGAC	.((((((.((((((((((((((..(((.(((((((.((((....))).).))))))))))..)))))))))))).)))))))).	chr19 - 50335226 50335310	intron	100	0	-57.8	yes	mir-150	Vertebrates	a, b		mir-150	intron	100	A	1	mir-150	Vertebrata	Ref1	CTCCCCATGGCCCTGTCTCCCAACCCTTGTACCAGTGCTGGGCTCAGACCCTGGTACAGGCCTGGGGGACAGGGACCTGGGGAC	chr19 - 50335226 50335310	intron
mir-4750	CGCTCGGGCGGAGGTGGCTGAGTGCTGACTGGCGCCTGACCCACCCCCTCCCGCAG	..((((((.((.(((((.(.((((((....)))).)).).))))).)).)))).))	chr19 + 50770621 50770677	intron	96.43	0	-25.7	no		Primates	b, c		mir-4750	intron	96.43	A	0		Primates	anotation	CGCTCGGGCGGAGGTGGCTGAGTGCTGACTGGCGCCTGACCCACCCCCTCCCGCAG	chr19 + 50770621 50770677	intron
mir-4751	CCCGGAGCCAGAGGACCCGTAGCTGCTAGAAGGACGGGGGTGTGGCTTCTGGGGGCTGGTCTTCAGCTCTGGCT	.(((((((..(((((((...((((.(((((((.(((....)))..))))))).))))))))))).)))))))..	chr19 + 50815271 50815345	3UTR	95.95	0	-39.2	no		Primates	a, b		mir-4751	3UTR	95.95	A	0		Primates	Ref2	CCCGGAGCCAGAGGACCCGTAGCTGCTAGAAGGACGGGGGTGTGGCTTCTGGGGGCTGGTCTTCAGCTCTGGCT	chr19 + 50815271 50815345	3UTR
mir-99b	TCCTGGCACCCACCCGTAGAACCGACCTTGCGGGGCCTTCGCCGCACACAAGCTCGTGTCTGTGGGTCCGTGTCGGGGGC	(((((((((..(((((((((..(((.((((.(.(((....))).)...)))).)))..)))))))))..)))))))))..	chr19 + 52420893 52420973	intron	100	0	-38	yes	mir-10	Vertebrates	a, b		mir-99b	intron	100	A	1	mir-10	Vertebrata	Ref1	TCCTGGCACCCACCCGTAGAACCGACCTTGCGGGGCCTTCGCCGCACACAAGCTCGTGTCTGTGGGTCCGTGTCGGGGGC	chr19 + 52420893 52420973	intron
mir-3596c	CCCCGTCCCGTGCAGGGCGCAGCCTGGGGAAAGCTAGGAGGCCGTATAGTGATCTCCTTGGGTGTCCTCCTCAACTATACAACCTCCTACCTCAGCCCGGGGGGCGCGGCAGGCGGA	..(((((...(((...((((..((((((...((.(((((((..(((((((.........(((......)))..)))))))..))))))).))...))))))..)))).)))))))).	chr19 - 52421056 52421173	intron	94.87	0	-51.3	no	let-7	Mammals	b		mir-3596c	intron	94.87	A	0	let-7	Mammalia		CCCCGTCCCGTGCAGGGCGCAGCCTGGGGAAAGCTAGGAGGCCGTATAGTGATCTCCTTGGGTGTCCTCCTCAACTATACAACCTCCTACCTCAGCCCGGGGGGCGCGGCAGGCGGA	chr19 - 52421056 52421173	intron
let-7e	CCCGGGCTGAGGTAGGAGGTTGTATAGTTGAGGAGGACACCCAAGGAGATCACTATACGGCCTCCTAGCTTTCCCCAGG	((.(((..(((.((((((((((((((((.((((.(....))).......)))))))))))))))))).)))..))).))	chr19 + 52421072 52421151	intron	100	0	-36.7	yes	let-7	Vertebrates	a, b		let-7e	intron	100	A	1	let-7	Vertebrata	Ref1	CCCGGGCTGAGGTAGGAGGTTGTATAGTTGAGGAGGACACCCAAGGAGATCACTATACGGCCTCCTAGCTTTCCCCAGG	chr19 + 52421072 52421151	intron
mir-125a	TGCCAGTCTCTGGGTCCCTGAGACCCTTTAACCTGTGAGGACATCCAGGGTCACAGGTGAGGTTCTTGGGAGCCTGGCGTCTGGCC	.(((((.(.((((((.(((((((.((((..((((((((((....))....)))))))))))).))))))).)))))).).))))).	chr19 + 52421541 52421627	intron	100	0	-44.9	yes	mir-10	Vertebrates	a, b		mir-125a	intron	100	A	1	mir-10	Vertebrata	Ref1	TGCCAGTCTCTGGGTCCCTGAGACCCTTTAACCTGTGAGGACATCCAGGGTCACAGGTGAGGTTCTTGGGAGCCTGGCGTCTGGCC	chr19 + 52421541 52421627	intron
mir-643	ACCAACTGATACGCATTATCTACCTGAGCTAGAATACAAGTAGTTGGTGTCTTCAGAGACACTTGTATTCTAGCTCAGGTAGATACTGAATGGAAAA	.............((.(((((((((((((((((((((((((.(((..((....))..)))))))))))))))))))))))))))).)).........	chr19 + 52993592 52993689	intron	100	0	-46.9	no	mir-643	Primates	a		mir-643	intron	100	A	0	mir-643	Primates	Ref1 Ref2	ACCAACTGATACGCATTATCTACCTGAGCTAGAATACAAGTAGTTGGTGTCTTCAGAGACACTTGTATTCTAGCTCAGGTAGATACTGAATGGAAAA	chr19 + 52993592 52993689	intron
mir-512	TCTCACTCTGTGGCACTCAGCCTCGGGGGCACTTTCTGGTGTCAGAATGAAAGTGCCGTCATTGCTGAGATCCAATGACTGAGG	.((((.((..(((..((((((...((.(((((((((............))))))))).))...))))))..)))..)).)))).	chr19 + 54493931 54494015	space	98.81	0	-37.8	no	mir-506	Mammals	a		mir-512	space	98.81	A	0	mir-506	Mammalia	Ref1	TCTCACTCTGTGGCACTCAGCCTCGGGGGCACTTTCTGGTGTCAGAATGAAAGTGCCGTCATTGCTGAGATCCAATGACTGAGG	chr19 + 54493931 54494015	space
mir-512-2	GGTACTTCTCACTCTGTGGCACTCAGCCTCGGGGGCACTTTCTGGTGTCAGAATGAAAGTGCTGTCATTGCTGAGATCCAATGACTGAGGCGAGCACC	(((.(((((((.((..(((..((((((...((.(((((((((............))))))))).))...))))))..)))..)).))))..))).)))	chr19 + 54496377 54496475	space	93.88	2	-38.8	no	mir-506	Mammals	a, b		mir-512-2	space	93.88	C	0	mir-506	Mammalia	Ref1	GGTACTTCTCACTCTGTGGCACTCAGCCTCGGGGGCACTTTCTGGTGTCAGAATGAAAGTGCTGTCATTGCTGAGATCCAATGACTGAGGCGAGCACC	chr19 + 54496377 54496475	space
mir-1323	TGACATTCAGACTGATGTCCTCAAAACTGAGGGGCATTTTCTGTGATTTGAAAGGAAAGTGCACCCAGTTTTGGGGATGTCAATTGTGAATACTCATCATAACCCATT	(((.(((((.(.(((((((((((((((((.((.(((((((((...........))))))))).)))))))))))))))))))..).)))))..)))............	chr19 + 54498487 54498595	space	100	0	-42.3	no	mir-1323	Primates	a, b		mir-1323	space	100	A	0	mir-1323	Primates	Ref1	TGACATTCAGACTGATGTCCTCAAAACTGAGGGGCATTTTCTGTGATTTGAAAGGAAAGTGCACCCAGTTTTGGGGATGTCAATTGTGAATACTCATCATAACCCATT	chr19 + 54498487 54498595	space
mir-498	AATCCTCCTTGGGAAGTGAAGCTCAGGCTGTGATTTCAAGCCAGGGGGCGTTTTTCTGTGACTGGATGAAAAGCACCTCCGGGGCTTGAAGCTCACAGTTTGAGAGCAATCATCTAAGGAAGTT	.....((((((((........(((((((((((((((((((((.(((((.(((((((...........))))))).)))))..))))))))).))))))))))))........))))))))....	chr19 + 54500246 54500370	space	100	0	-58.5	no	mir-498	Mammals	a, b		mir-498	space	100	A	0	mir-498	Mammalia	Ref1	AATCCTCCTTGGGAAGTGAAGCTCAGGCTGTGATTTCAAGCCAGGGGGCGTTTTTCTGTGACTGGATGAAAAGCACCTCCGGGGCTTGAAGCTCACAGTTTGAGAGCAATCATCTAAGGAAGTT	chr19 + 54500246 54500370	space
mir-515-2	TTGGAGCGAGAAGATCTCATGCAGTCATTCTCCAATAGGAAGCACCATCTGTGGTCTGAAAGCAAGCAGAGGGCCTCCTTTTGGAGCGTTACTGTTTGAGAAAAACTACGTTGAAGTTG	....((((((....(((((.(((((.((.((((((.((((.((.((.(((((.((......))..))))))))).)))).)))))).)).))))).)))))....)).)))).......	chr19 + 54503181 54503300	space	93.04	2	-43.4	no	mir-515	Primates	c		mir-515-2	space	93.04	C	0	mir-515	Primates	anotation	TTGGAGCGAGAAGATCTCATGCAGTCATTCTCCAATAGGAAGCACCATCTGTGGTCTGAAAGCAAGCAGAGGGCCTCCTTTTGGAGCGTTACTGTTTGAGAAAAACTACGTTGAAGTTG	chr19 + 54503181 54503300	space
mir-519e	GAGAAGATCTCATGCAGTCATTCTCCAATGGGAAGCACCTTCTGTGGTCTGAAAGCAAGCAGAGGGCCTCCTTTTGGAGCATTACTGTTTGAGAGAAACCACGTCAAAGT	.......(((((.(((((.((.((((((.((((.((.(((.((((.((......))..))))))))).)))).)))))).)).))))).)))))................	chr19 + 54504431 54504541	space	98.18	0	-39.4	no	mir-515	Primates	a, b		mir-519e	space	98.18	A	0	mir-515	Primates	Ref1	GAGAAGATCTCATGCAGTCATTCTCCAATGGGAAGCACCTTCTGTGGTCTGAAAGCAAGCAGAGGGCCTCCTTTTGGAGCATTACTGTTTGAGAGAAACCACGTCAAAGT	chr19 + 54504431 54504541	space
mir-519e	GAGAAGATCTCATGCAGTCATTCTCCAATGGGAAGCACCTTCTGTGGTCTGAAAGCAAGCAGAGGGCCTCCTTTTGGAGCATTACTGTTTGAGAGAAACCACGTTGAAGT	.......(((((.(((((.((.((((((.((((.((.(((.((((.((......))..))))))))).)))).)))))).)).))))).)))))................	chr19 + 54505364 54505474	space	98.18	0	-39.4	no	mir-515	Primates	a, b		mir-519e	space	98.18	A	0	mir-515	Primates	Ref1	GAGAAGATCTCATGCAGTCATTCTCCAATGGGAAGCACCTTCTGTGGTCTGAAAGCAAGCAGAGGGCCTCCTTTTGGAGCATTACTGTTTGAGAGAAACCACGTTGAAGT	chr19 + 54505364 54505474	space
mir-519e	GAGAAGATCTCATGCAGTCATTCTCCAATGGGAAGCACCTTCTGTGGTCTGAAAGCAAGCAGAGGGCCTCCTTTTGGAGCATTACTGTTTGAGAGTAACCACGTCGAAGT	.......(((((.(((((.((.((((((.((((.((.(((.((((.((......))..))))))))).)))).)))))).)).))))).)))))................	chr19 + 54506870 54506980	space	100	0	-39.4	no	mir-515	Primates	a, b		mir-519e	space	100	A	0	mir-515	Primates	Ref1	GAGAAGATCTCATGCAGTCATTCTCCAATGGGAAGCACCTTCTGTGGTCTGAAAGCAAGCAGAGGGCCTCCTTTTGGAGCATTACTGTTTGAGAGTAACCACGTCGAAGT	chr19 + 54506870 54506980	space
mir-519c	TCTCAGTCTGTGACCCTCTAGAAGGAAGCGCTTTCTGTTGTTTGAAAGAAAAGAAAGTGCGTCATTTTAGAGGATTACAGTTTGAGA	((((((.((((((.(((((((((.((.(((((((((.((.((...)).)).))))))))).)).))))))))).)))))).))))))	chr19 + 54508678 54508765	space	97.7	1	-39.5	no	mir-515	Primates	a, b		mir-519c	space	97.7	B	0	mir-515	Primates	Ref1	TCTCAGTCTGTGACCCTCTAGAAGGAAGCGCTTTCTGTTGTTTGAAAGAAAAGAAAGTGCGTCATTTTAGAGGATTACAGTTTGAGA	chr19 + 54508678 54508765	space
mir-1283	GAACATCCCAGGCTGTGACTCTACGAAGGAAAGCACTTTCTGTTGTCGAAAGAAAAGAAAGCGCTTCCCTTTTGAGAATTACGGTTTGAGAAAAGCAGTGTTGAAGTTGA	.....((.((((((((((.(((..(((((.((((.((((((....((....))..)))))).)))).)))))..))).)))))))))).))...................	chr19 + 54511548 54511658	space	99.09	1	-34.2	no	mir-515	Primates	a, b		mir-1283	space	99.09	B	0	mir-515	Primates	Ref1	GAACATCCCAGGCTGTGACTCTACGAAGGAAAGCACTTTCTGTTGTCGAAAGAAAAGAAAGCGCTTCCCTTTTGAGAATTACGGTTTGAGAAAAGCAGTGTTGAAGTTGA	chr19 + 54511548 54511658	space
mir-520a	CTCAGGCTGTGACCCTCCAGAGGGAAGTATTTTCTGTTGTCTGAAGGAAAAGAAAGTGCTTCCCTTTGGACTGTTTCGGTTTGAG	(((((((((.(((..((((((((((((((((((((....(((...)))..))))))))))))))))))))..))).)))))))))	chr19 + 54513173 54513258	space	100	0	-46	no	mir-515	Mammals	a, b		mir-520a	space	100	A	0	mir-515	Mammalia	Ref1	CTCAGGCTGTGACCCTCCAGAGGGAAGTATTTTCTGTTGTCTGAAGGAAAAGAAAGTGCTTCCCTTTGGACTGTTTCGGTTTGAG	chr19 + 54513173 54513258	space
mir-526b	TCAGGCTGTGACCCTCTTGAGGGAAGCACTTTCTGTTGTCTGAATAAAAAGAAAGTGCTTCCTTTTAGAGGCTTACGGTCTGA	(((((((((((.(((((.((((((((((((((((.((((....))))..)))))))))))))))).))))).)))))))))))	chr19 + 54520778 54520861	space	100	0	-49	no	mir-515	Mammals	a, b		mir-526b	space	100	A	0	mir-515	Mammalia	Ref1	TCAGGCTGTGACCCTCTTGAGGGAAGCACTTTCTGTTGTCTGAATAAAAAGAAAGTGCTTCCTTTTAGAGGCTTACGGTCTGA	chr19 + 54520778 54520861	space
mir-519a-2	GTGCTGGAGCAAGAAGATCTCAGGCTCTAACCCTCTAGAGGGAAGCGCTTTCTGTCGTCTGAGAGAGAAGAAAGTGCATCCTTTTAGAGGATTACGGTTTGAGAAAAGCAATGGTGAAG	.((((............(((((((((.(((.((((((((((((.(((((((((.((........))..))))))))).)))))))))))).))).)))))))))..)))).........	chr19 + 54521576 54521695	space	100	0	-48	no	mir-515	Primates	a		mir-519a-2	space	100	A	0	mir-515	Primates	Ref1	GTGCTGGAGCAAGAAGATCTCAGGCTCTAACCCTCTAGAGGGAAGCGCTTTCTGTCGTCTGAGAGAGAAGAAAGTGCATCCTTTTAGAGGATTACGGTTTGAGAAAAGCAATGGTGAAG	chr19 + 54521576 54521695	space
mir-525	CTCAGGCTGTGACTCTCCAGAGGGATGCACTTTCTTTTATGTGAAAAAAAAAGAAGGCGCATCCCTTTGGAGCGTTACGGTTTGGG	(((((((((((((.((((((((((((((.(((((((((.(......).))))))))).)))))))))))))).)))))))))))))	chr19 + 54523963 54524049	space	100	0	-54.4	no	mir-515	Primates	a, b		mir-525	space	100	A	0	mir-515	Primates	Ref1	CTCAGGCTGTGACTCTCCAGAGGGATGCACTTTCTTTTATGTGAAAAAAAAAGAAGGCGCATCCCTTTGGAGCGTTACGGTTTGGG	chr19 + 54523963 54524049	space
mir-523a	TCTCAGGCTGTGACCCTCTAGAGGGAAGCACTTTCTGTTGTCTGGAAGAAAAGAATGCGCTTCCCTTTAGAGGGTTACTCTCTGAGA	(((((((..((((((((((((((((((((.(.((((....(((...)))..)))).).))))))))))))))))))))..)))))))	chr19 + 54524809 54524896	space	100	0	-52	no	mir-515	Primates	a		mir-523a	space	100	A	0	mir-515	Primates	Ref1	TCTCAGGCTGTGACCCTCTAGAGGGAAGCACTTTCTGTTGTCTGGAAGAAAAGAATGCGCTTCCCTTTAGAGGGTTACTCTCTGAGA	chr19 + 54524809 54524896	space
mir-518f	TCTCAGGCTGTGACCCTCTAGAGGGAAGCACTTTATCTTGTGTGAAAGGAAAGAAAGCGCTTCCCTTCAGAGGATTACTCTTTGAGA	(((((((..((((.(((((.(((((((((.((((.((((.......))))...)))).))))))))).))))).))))..)))))))	chr19 + 54526779 54526866	space	100	0	-39.4	no	mir-515	Primates	a		mir-518f	space	100	A	0	mir-515	Primates	Ref1	TCTCAGGCTGTGACCCTCTAGAGGGAAGCACTTTATCTTGTGTGAAAGGAAAGAAAGCGCTTCCCTTCAGAGGATTACTCTTTGAGA	chr19 + 54526779 54526866	space
mir-519a	CTCAGGCTGTGACCCTCTAGAGGGAAGCGCTTTCTGTGGTCTGAAAGAAAAGAAAGTGCTTCCTTTTAGAGGGTTACCGTTTGAG	(((((((.(((((((((((((((((((((((((((....(((...)))..))))))))))))))))))))))))))).)))))))	chr19 + 54527954 54528039	space	100	0	-55.7	no	mir-515	Primates	a, b		mir-519a	space	100	A	0	mir-515	Primates	Ref1	CTCAGGCTGTGACCCTCTAGAGGGAAGCGCTTTCTGTGGTCTGAAAGAAAAGAAAGTGCTTCCTTTTAGAGGGTTACCGTTTGAG	chr19 + 54527954 54528039	space
mir-518b	TCAGGCTGTGACCCTCCAGAGGGAAGCACTTTCTGTTGTCTGAAAGAAAGCAAAGCGCTCCCCTTTAGAGGATTACGGTTTGA	(((((((((((.((((.((((((.(((.(((..((((.(((...))).))))))).))).)))))).)))).)))))))))))	chr19 + 54530313 54530396	space	100	0	-37.4	no	mir-515	Primates	a, b		mir-518b	space	100	A	0	mir-515	Primates	Ref1	TCAGGCTGTGACCCTCCAGAGGGAAGCACTTTCTGTTGTCTGAAAGAAAGCAAAGCGCTCCCCTTTAGAGGATTACGGTTTGA	chr19 + 54530313 54530396	space
mir-526a-1	CTCAGGCTGTGACCGTCTAGAGGGAAGCACTTTCTGTTGCTTGAAAGAAGGGAAAGCGCTTCCTTTTAGAGGATTACTCTTTGAG	((((((..((((.(.(((((((((((((.((((((.((.((....)))).)))))).))))))))))))).).))))..))))))	chr19 + 54533911 54533996	space	97.65	0	-39.1	no	mir-515	Mammals	b, c		mir-526a-1	space	97.65	A	0	mir-515	Mammalia	anotation	CTCAGGCTGTGACCGTCTAGAGGGAAGCACTTTCTGTTGCTTGAAAGAAGGGAAAGCGCTTCCTTTTAGAGGATTACTCTTTGAG	chr19 + 54533911 54533996	space
mir-518c	GCGAGAAGATTTCATGCTGTGACTCTCTGGAGGGAAGCGCTTTCTGTTGTCTGAAAGAAAACAAAGCGCTTCTCTTTAGAGAGTTACGGTTTGAGAAAAGC	.........(((((.(((((((((((((((((((((((((((..((((.(((...))).))))))))))))))))))))))))))))))).))))).....	chr19 + 54538142 54538243	space	99.01	0	-53.1	no	mir-515	Primates	a, b		mir-518c	space	99.01	A	0	mir-515	Primates	Ref1	GCGAGAAGATTTCATGCTGTGACTCTCTGGAGGGAAGCGCTTTCTGTTGTCTGAAAGAAAACAAAGCGCTTCTCTTTAGAGAGTTACGGTTTGAGAAAAGC	chr19 + 54538142 54538243	space
mir-524	TCATGCTGTGACCCTACAAAGGCAAGCACTTTCTCTTGTCTAAAAGAAAAGAAGGTGCTTCCCTTTGCAGTGTTACGGTTTGAGA	(((.((((((((.((.((((((.((((((((((((((......))))...)))))))))).)))))).)).)))))))).)))..	chr19 + 54540026 54540111	space	100	0	-38.8	no	mir-515	Primates	a, b		mir-524	space	100	A	0	mir-515	Primates	Ref1	TCATGCTGTGACCCTACAAAGGCAAGCACTTTCTCTTGTCTAAAAGAAAAGAAGGTGCTTCCCTTTGCAGTGTTACGGTTTGAGA	chr19 + 54540026 54540111	space
mir-517a	CTCATGCAGTGACCCTCTAGATGGAAGCACTGTCTGTGGTCTAAAAGAAAAGATCGTGCATCCTTTTAGAGTGTTACCGTTTGAGA	((((.((.(((((.(((((((.(((.((((.((((....(((...)))..)))).)))).))).))))))).))))).)).)))).	chr19 + 54542039 54542125	space	100	0	-35.9	no	mir-515	Primates	a, b		mir-517a	space	100	A	0	mir-515	Primates	Ref1	CTCATGCAGTGACCCTCTAGATGGAAGCACTGTCTGTGGTCTAAAAGAAAAGATCGTGCATCCTTTTAGAGTGTTACCGTTTGAGA	chr19 + 54542039 54542125	space
mir-519d	TCCCAAGCTGTGACCCTCCAAAGGGAAGCACTTTCTGTTTGTTGTCTGAGAGAAAACAAAGTGCTTCCTTTTAGAGTGTGACCGCTTGGGA	((((((((.((.((.(((.((((((((((((((..(((((.............))))))))))))))))))).))).)).)).))))))))	chr19 + 54543187 54543278	space	100	0	-45.2	no	mir-515	Primates	a		mir-519d	space	100	A	0	mir-515	Primates	Ref1	TCCCAAGCTGTGACCCTCCAAAGGGAAGCACTTTCTGTTTGTTGTCTGAGAGAAAACAAAGTGCTTCCTTTTAGAGTGTGACCGCTTGGGA	chr19 + 54543187 54543278	space
mir-518a-1	TCTCATGCTGTGACCCTACAAAGGGAAGCCCTTTCTGTTGTCTAAACGAAAAGAAAGTGCTTCTCTTTGCTGGGTTACGGTTTGAGA	(((((.((((((((((..(((((((((((.((((((.((((....))))..)))))).)))))))))))..)))))))))).)))))	chr19 + 54549196 54549283	space	100	0	-49	no	mir-515	Primates	a, b		mir-518a-1	space	100	A	0	mir-515	Primates	Ref1	TCTCATGCTGTGACCCTACAAAGGGAAGCCCTTTCTGTTGTCTAAACGAAAAGAAAGTGCTTCTCTTTGCTGGGTTACGGTTTGAGA	chr19 + 54549196 54549283	space
mir-520g	TCCCATGCTGTGGCCCTCTAGAGAAAGCACTTTCTGTTTGTTGTCTGAGGAAAAACAAAGTGCTTCCCTTCAGAGTGTGGCTGTTTGGGA	(((((.((.((.((.((((.(((.(((((((((...(((.((.....)).)))...)))))))))..))).)))).)).)).)).)))))	chr19 + 54551240 54551330	space	100	0	-32.2	no	mir-515	Mammals	a, b		mir-520g	space	100	A	0	mir-515	Mammalia	Ref1	TCCCATGCTGTGGCCCTCTAGAGAAAGCACTTTCTGTTTGTTGTCTGAGGAAAAACAAAGTGCTTCCCTTCAGAGTGTGGCTGTTTGGGA	chr19 + 54551240 54551330	space
mir-518d-1	GAAGATCTCATGATGTGACTCTCTAGAGGAAAGCGCTTACTGTTGGCTAAAAAAATAGGAAGCGCTTCTCTTTAGAGTGTTACGCTTTGAGAAAAGCAACGCGGATCTTG	.(((((((......(((((.(((((((((.(((((((..(((((.........)))))..))))))).))))))))).)))))(((((....))))).....))))))).	chr19 + 54556026 54556136	space	100	0	-44.8	no	mir-515	Primates	a, b		mir-518d-1	space	100	A	0	mir-515	Primates	Ref1	GAAGATCTCATGATGTGACTCTCTAGAGGAAAGCGCTTACTGTTGGCTAAAAAAATAGGAAGCGCTTCTCTTTAGAGTGTTACGCTTTGAGAAAAGCAACGCGGATCTTG	chr19 + 54556026 54556136	space
mir-518g	CTCTAGAGGAAAGCGCTTTCTGTTGGCCAAAAGAATAGGAAGCACTTCCCTTTAGAGTG	(((((((((.(((.((((((((((.........)))))))))).))).)))))))))..	chr19 + 54558699 54558758	space	100	0	-27.7	no	mir-515	Primates	a, b		mir-518g	space	100	A	0	mir-515	Primates	Ref1	CTCTAGAGGAAAGCGCTTTCTGTTGGCCAAAAGAATAGGAAGCACTTCCCTTTAGAGTG	chr19 + 54558699 54558758	space
mir-518d-2	CTCTAGAGGAAAGCGCTTACTGTTGGCTAAAAAAATAGGAAGCGCTTCTCTTTAGAGTG	(((((((((.(((((((..(((((.........)))))..))))))).)))))))))..	chr19 + 54560559 54560618	space	100	0	-27.2	no	mir-515	Primates	a, b		mir-518d-2	space	100	A	0	mir-515	Primates	Ref1	CTCTAGAGGAAAGCGCTTACTGTTGGCTAAAAAAATAGGAAGCGCTTCTCTTTAGAGTG	chr19 + 54560559 54560618	space
mir-523b	TCTCATGATGTGACCCTCTAGAGCGAAGCGCTTTCTGTTGGCTAGAAAAGAATAGGAAGCGCTTCCCTTTAGAGTGTTACGCTTTGAGA	(((((...((((((.((((((((.(((((((((((((((...........))))))))))))))).)))))))).))))))...)))))	chr19 + 54563138 54563227	space	100	0	-45.3	no	mir-515	Primates	a, b		mir-523b	space	100	A	0	mir-515	Primates	Ref1	TCTCATGATGTGACCCTCTAGAGCGAAGCGCTTTCTGTTGGCTAGAAAAGAATAGGAAGCGCTTCCCTTTAGAGTGTTACGCTTTGAGA	chr19 + 54563138 54563227	space
mir-516b-1	TCTCAGGCTGTGACCATCTGGAGGTAAGAAGCACTTTCTGTTTTGTGAAAGAAAAGAAAGTGCTTCCTTTCAGAGGGTTACTCTTTGAGA	(((((((..((((((.((((((((...((((((((((((.((((.....)))).)))))))))))))))))))).))))))..)))))))	chr19 + 54572573 54572663	space	100	0	-44	no	mir-515	Primates	a, b		mir-516b-1	space	100	A	0	mir-515	Primates	Ref1	TCTCAGGCTGTGACCATCTGGAGGTAAGAAGCACTTTCTGTTTTGTGAAAGAAAAGAAAGTGCTTCCTTTCAGAGGGTTACTCTTTGAGA	chr19 + 54572573 54572663	space
mir-518a-3	CTGGAGCCAGAAGATCTCGGGCTGTGACCCTACAAAGGGAAGCCCTTTCTGTTGTCTAAACGAAAAGAAAGTGCTTCTCTTTGCTGGGTTACGGTTTGAGAAAAGCAGCGTTGAAGTTG	(((....)))....((((((((((((((((..(((((((((((.((((((.((((....))))..)))))).)))))))))))..))))))))))))))))....((((......))))	chr19 + 54575790 54575909	space	100	0	-55.2	no	mir-515	Primates	a, b		mir-518a-3	space	100	A	0	mir-515	Primates	Ref1	CTGGAGCCAGAAGATCTCGGGCTGTGACCCTACAAAGGGAAGCCCTTTCTGTTGTCTAAACGAAAAGAAAGTGCTTCTCTTTGCTGGGTTACGGTTTGAGAAAAGCAGCGTTGAAGTTG	chr19 + 54575790 54575909	space
mir-517c	TATTGGAGCGAGAAGATCTCCTCATGCAGTGACACTCTAAATGGCAGCACTGTCTGTGGTCTAAAACAAGATCGTGCAGCCTTTTAGAGTGTTACTGTGTGAGAAAAGCAA	.........((((...))))(((((((((((((((((((((.(((.((((.((((((........)).)))).)))).))).)))))))))))))))))))))........	chr19 + 54577755 54577866	space	100	0	-52.6	no	mir-515	Primates	a, b		mir-517c	space	100	A	0	mir-515	Primates	Ref1	TATTGGAGCGAGAAGATCTCCTCATGCAGTGACACTCTAAATGGCAGCACTGTCTGTGGTCTAAAACAAGATCGTGCAGCCTTTTAGAGTGTTACTGTGTGAGAAAAGCAA	chr19 + 54577755 54577866	space
mir-520g	TGCCATGCTGTGGCCCTCTAGAGAAAGCACTTTCTGTTTGTTGTCTGAGGAAAAACAAAGTGCTTCCCTTCAGAGTGTGACCATTTGGGA	..(((....((.((.((((.(((.(((((((((...(((.((.....)).)))...)))))))))..))).)))).)).))....)))..	chr19 + 54578975 54579065	space	95.56	0	-25.2	no	mir-515	Mammals	a		mir-520g	space	95.56	A	0	mir-515	Mammalia	Ref1	TGCCATGCTGTGGCCCTCTAGAGAAAGCACTTTCTGTTTGTTGTCTGAGGAAAAACAAAGTGCTTCCCTTCAGAGTGTGACCATTTGGGA	chr19 + 54578975 54579065	space
mir-519b	CATGCTGTGACCCTCTGGAGGGAAGCGCTTTCTGTTGTCTGAAAGAAAAGAACGTGCATCCCTTTAGAGGGTTACTCTTTG	......(((((((((((((((((.((((.((((....(((...)))..)))).)))).)))))))))))))))))......	chr19 + 54585129 54585210	space	100	0	-41.1	no	mir-515	Primates	a, b		mir-519b	space	100	A	0	mir-515	Primates	Ref1	CATGCTGTGACCCTCTGGAGGGAAGCGCTTTCTGTTGTCTGAAAGAAAAGAACGTGCATCCCTTTAGAGGGTTACTCTTTG	chr19 + 54585129 54585210	space
mir-521	TCTCATGCTGTGACCCTCCAAAGGGAAGTACTTTCTGTTGTCTAAAAGAAAAGAACGCACTTCCCTTTGGAGTGTTACCGTTTGAGA	(((((.((.(((((.((((((((((((((.(.((((....(((...)))..)))).).)))))))))))))).))))).)).)))))	chr19 + 54586824 54586911	space	100	0	-41.8	no	mir-515	Primates	a, b		mir-521	space	100	A	0	mir-515	Primates	Ref1	TCTCATGCTGTGACCCTCCAAAGGGAAGTACTTTCTGTTGTCTAAAAGAAAAGAACGCACTTCCCTTTGGAGTGTTACCGTTTGAGA	chr19 + 54586824 54586911	space
mir-518e	TCTCAGGCTGTGACCCTCTAGAGGGAAGCGATTTCTGTGATCTGAAAGAAAAGAAAATGGTTCCCTTTAGAGTGTTACTGTTTGAGA	((((((((.(((((.((((((((((((.((.(((((....(((...)))..))))).)).)))))))))))).))))).))))))))	chr19 + 54588396 54588483	space	100	0	-41.8	no	mir-515	Primates	a, b		mir-518e	space	100	A	0	mir-515	Primates	Ref1	TCTCAGGCTGTGACCCTCTAGAGGGAAGCGATTTCTGTGATCTGAAAGAAAAGAAAATGGTTCCCTTTAGAGTGTTACTGTTTGAGA	chr19 + 54588396 54588483	space
mir-518a-4	CAAGAAGATTTCATGCTGTGACCCTACAAAGGGAAGCCCTTTCTGTTGTCTAAACGAAAAGAAAGTGCTTCTCTTTGCTGGGTTACGGTTTGAGAAAAGCAACGTTGAAG	........(((((.((((((((((..(((((((((((.((((((.((((....))))..)))))).)))))))))))..)))))))))).)))))...............	chr19 + 54590872 54590982	space	99.09	0	-47.2	no	mir-515	Primates	a, b		mir-518a-4	space	99.09	A	0	mir-515	Primates	Ref1	CAAGAAGATTTCATGCTGTGACCCTACAAAGGGAAGCCCTTTCTGTTGTCTAAACGAAAAGAAAGTGCTTCTCTTTGCTGGGTTACGGTTTGAGAAAAGCAACGTTGAAG	chr19 + 54590872 54590982	space
mir-516a-2	TCTCAGGCTGTGACCGTCTCGAGGAAAGAAGCACTTTCTGTTGTCTAAAGAAAAGGAAGTGTTTCCTTCCCGAGGGTTACGGTTTGAGA	(((((((((((((((..((((.((((.((((((((((((.((........)).)))))))))))).)))))))))))))))))))))))	chr19 + 54592481 54592570	space	100	0	-48.2	no	mir-515	Primates	a, b		mir-516a-2	space	100	A	0	mir-515	Primates	Ref1	TCTCAGGCTGTGACCGTCTCGAGGAAAGAAGCACTTTCTGTTGTCTAAAGAAAAGGAAGTGTTTCCTTCCCGAGGGTTACGGTTTGAGA	chr19 + 54592481 54592570	space
mir-516a-1	TCTCAGGCTGTGACCGTCTCGAGGAAAGAAGCACTTTCTGTTGTCTAAAGAAAAGGAAGTGTTTCCTTCCCGAGGGTTACGGTTTGAGA	(((((((((((((((..((((.((((.((((((((((((.((........)).)))))))))))).)))))))))))))))))))))))	chr19 + 54597162 54597251	space	100	0	-48.2	no	mir-515	Primates	a, b		mir-516a-1	space	100	A	0	mir-515	Primates	Ref1	TCTCAGGCTGTGACCGTCTCGAGGAAAGAAGCACTTTCTGTTGTCTAAAGAAAAGGAAGTGTTTCCTTCCCGAGGGTTACGGTTTGAGA	chr19 + 54597162 54597251	space
mir-517b	CTGGAGCAAGAAGATCTCAGGCTGTGACCGTCTACAGGGAAGCACTTTCTATGGTCAGAAAAAGAAAGTGCATCCTTTTAGAGTGTTACTATTTGAGAAAAGCAACATTGAA	.((..((.......(((((((..(((((..((((.(((((.(((((((((.(........).))))))))).))))).))))..)))))..)))))))...))..)).....	chr19 + 54598646 54598758	space	99.11	0	-36.8	no	mir-515	Primates	a		mir-517b	space	99.11	A	0	mir-515	Primates	Ref1	CTGGAGCAAGAAGATCTCAGGCTGTGACCGTCTACAGGGAAGCACTTTCTATGGTCAGAAAAAGAAAGTGCATCCTTTTAGAGTGTTACTATTTGAGAAAAGCAACATTGAA	chr19 + 54598646 54598758	space
mir-371	GTGGCACTCAAACTGTGGGGGCACTTTCTGCTCTCTGGTGAAAAAAGTGCCGCCATGTTTTGAGTGTTAC	((((((((((((.(((((.((((((((.((((....))))...)))))))).))))).))))))))))))	chr19 + 54627979 54628049	space	100	0	-35.6	yes	mir-290	Mammals	a, b		mir-371	space	100	A	4	mir-290	Mammalia	Ref1	GTGGCACTCAAACTGTGGGGGCACTTTCTGCTCTCTGGTGAAAAAAGTGCCGCCATGTTTTGAGTGTTAC	chr19 + 54627979 54628049	space
mir-371b	GGTAACACTCAAAACATGGCGGCACTTTTTTCACCAGAGAGCAGAAAGTGCCCCCACAGTTTGAGTGCC	.....((((((((...(((.((((((((((.(........).)))))))))).)))...))))))))..	chr19 - 54627981 54628050	intron	98.48	0	-27.7	yes	mir-290	Mammals	b		mir-371b	intron	98.48	A	2	mir-290	Mammalia		GGTAACACTCAAAACATGGCGGCACTTTTTTCACCAGAGAGCAGAAAGTGCCCCCACAGTTTGAGTGCC	chr19 - 54627981 54628050	intron
mir-372	GTGATCCTCAAATGTGGAGCACTATTCTGATGTCCAAGTGGAAAGTGCTGCGACATTTGAGCGTCAC	(((((.(((((((((.(((((((.((((..(.....)..)))))))))).).))))))))).)))))	chr19 + 54628188 54628255	space	100	0	-29.4	yes	mir-290	Mammals	a, b		mir-372	space	100	A	1	mir-290	Mammalia	Ref1	GTGATCCTCAAATGTGGAGCACTATTCTGATGTCCAAGTGGAAAGTGCTGCGACATTTGAGCGTCAC	chr19 + 54628188 54628255	space
mir-373	GGGATACCCAAAATGGGAGCACTTTCCCTTTTGTCTGTGCTGGGAAGTGCTTCGATTTTGGGGTGTCCC	((((((((((((((.(((((((((.(((.............)))))))))))).))))).)))))))))	chr19 + 54628899 54628968	space	100	0	-39.8	yes	mir-373	Mammals	a		mir-373	space	100	A	1	mir-373	Mammalia	Ref1	GGGATACCCAAAATGGGAGCACTTTCCCTTTTGTCTGTGCTGGGAAGTGCTTCGATTTTGGGGTGTCCC	chr19 + 54628899 54628968	space
mir-935	GGCGGGGGCGCGGGCGGCAGTGGCGGGAGCGGCCCCTCGGCCATCCTCCGTCTGCCCAGTTACCGCTTCCGCTACCGCCGCCGCTCCCGCT	(((((((((...((((((.(((((((((((((...((.(((............))).))...))))))))))))).)))))))))))))))	chr19 + 54825024 54825115	CDS	100	0	-61.2	yes	mir-935	Mammals	b, c		mir-935	cds	100	A	1	mir-935	Mammalia	anotation	GGCGGGGGCGCGGGCGGCAGTGGCGGGAGCGGCCCCTCGGCCATCCTCCGTCTGCCCAGTTACCGCTTCCGCTACCGCCGCCGCTCCCGCT	chr19 + 54825024 54825115	cds
mir-4752	AGTGTCTCCTTGTGGATCTCAAGGATGTGCTTCCACATAGCAGCATGTTCTTCAGATGGACAAGGAGACACT	(((((((((((((..((((.(((((((((((.(......).))))))))))).))))..)))))))))))))	chr19 + 55181007 55181079	space	100	0	-37.3	no		Primates	a, b		mir-4752	space	100	A	0		Primates	Ref2	AGTGTCTCCTTGTGGATCTCAAGGATGTGCTTCCACATAGCAGCATGTTCTTCAGATGGACAAGGAGACACT	chr19 + 55181007 55181079	space
mir-4752	AGTGTCTACTTGTGGACCTCAAGGATGTGCTTCCACATAGCAGCATGTTCTTCAGATGAACAAGGAGACACT	(((((((.(((((....((.(((((((((((.(......).))))))))))).))....))))).)))))))	chr19 - 55506715 55506787	space	95.83	1	-27.2	no		Primates	a, b		mir-4752	space	95.83	B	0		Primates	Ref2	AGTGTCTACTTGTGGACCTCAAGGATGTGCTTCCACATAGCAGCATGTTCTTCAGATGAACAAGGAGACACT	chr19 - 55506715 55506787	space
mir-6806	TGATCTGTAGGCATGAGGCAGGGCCCAGGTTCCATGTGATGCTGAAGCTCTGACGTTCCTGCAG	....(((((((.(((...((((((.(((..((.....))..)))..)))))).))).)))))))	chr19 + 58933283 58933347	intron	96.88	0	-22.4	no		Primates	b		mir-6806	intron	96.88	A	0		Primates		TGATCTGTAGGCATGAGGCAGGGCCCAGGTTCCATGTGATGCTGAAGCTCTGACGTTCCTGCAG	chr19 + 58933283 58933347	intron
mir-10394	TCTGCAGGTCCTGGTGAACGCCATCATCAACAGTGGTCCCCGGGAGGACTCCACCCGCATTGGACGTGCCGGGACTGTGAGAC	(((...(((((((((..((((((.........((((...((....))...))))......))).))))))))))))...))).	chr19 + 58994823 58994906	CDS	96.39	0	-29.6	no		Primates	b, c		mir-10394	CDS	96.39	A	0		Primates	anotation	TCTGCAGGTCCTGGTGAACGCCATCATCAACAGTGGTCCCCGGGAGGACTCCACCCGCATTGGACGTGCCGGGACTGTGAGAC	chr19 + 58994823 58994906	cds
mir-6807	GTGAGCCAGTGGAATGGAGGGGCTGTGGGCAGGGAGAGATGTGAAGGAAAGAGCTAGGACCCATTCATCCACTGCATTCCTGCTTGGTCCAG	.((.((((((((((((.(((((..((((((.((....................))..).)))))...))).)).)))))).)).)))).)).	chr19 + 59177276 59177368	intron	95.65	1	-26.3	no		Primates	b		mir-6807	intron	95.65	B	0		Primates		GTGAGCCAGTGGAATGGAGGGGCTGTGGGCAGGGAGAGATGTGAAGGAAAGAGCTAGGACCCATTCATCCACTGCATTCCTGCTTGGTCCAG	chr19 + 59177276 59177368	intron
mir-4752	AATGTCTCCTTGTGGATCTCAAGGATGTGCTTCCACATAGCAGCATGTTCTTCAGATGGACAAGGAGACACT	..(((((((((((..((((.(((((((((((.(......).))))))))))).))))..)))))))))))..	chr19_KE145842_random - 6071 6143	space	98.61	0	-33.6	no		Primates	a, b		mir-4752	space	98.61	A	0		Primates	Ref2	AATGTCTCCTTGTGGATCTCAAGGATGTGCTTCCACATAGCAGCATGTTCTTCAGATGGACAAGGAGACACT	chr19_KE145842_random - 6071 6143	space
mir-4752	AGTGTCTCCTTGTGGATCTCAAGGATGTGCTTCCACATAGCAGCATGTTCTTCAGATGGACAAGGAGACACT	(((((((((((((..((((.(((((((((((.(......).))))))))))).))))..)))))))))))))	chr19_KE145842_random - 17326 17398	space	100	0	-37.3	no		Primates	a, b		mir-4752	space	100	A	0		Primates	Ref2	AGTGTCTCCTTGTGGATCTCAAGGATGTGCTTCCACATAGCAGCATGTTCTTCAGATGGACAAGGAGACACT	chr19_KE145842_random - 17326 17398	space
mir-4797	TACTCAGAAGACAGAGTGCCACTTACTGAAAGGTGTTTTCTCTCAGTAAGTGGCACTCTGTCTTCTGAGTT	.((((((((((((((((((((((((((((.(((.....))).)))))))))))))))))))))))))))).	chr2 - 1625877 1625948	intron	97.18	0	-55	no		Primates	b		mir-4797	intron	97.18	A	0		Primates		TACTCAGAAGACAGAGTGCCACTTACTGAAAGGTGTTTTCTCTCAGTAAGTGGCACTCTGTCTTCTGAGTT	chr2 - 1625877 1625948	intron
mir-944	GTTCCAGACACATCTCATCTGATATACAATATTTTCTTAAATTGTAAAAAGAGAAATTATTGTATATCAGATGAGATGTGTCTGGGGT	.((((((((((((((((((((((((((((((.((((((............)))))).)))))))))))))))))))))))))))))).	chr2 - 7637433 7637521	intron	100	0	-53.4	no	mir-944	Primates	a, b		mir-944	intron	100	A	0	mir-944	Primates	Ref1	GTTCCAGACACATCTCATCTGATATACAATATTTTCTTAAATTGTAAAAAGAGAAATTATTGTATATCAGATGAGATGTGTCTGGGGT	chr2 - 7637433 7637521	intron
mir-28	GGTCCTTGCCCTCAAGGAGCTCACAGTCTATTGAGTTTCCTTTCTGACTTTCCCACTAGATTGTGAGCTCCTGGAGGGCAGGCACT	(((.(((((((((.((((((((((((((((.((((((........))))....)).)))))))))))))))).))))))))).)))	chr2 - 8777188 8777274	intron	98.84	0	-49.8	yes	mir-28	Mammals	a, b		mir-28	intron	98.84	A	1	mir-28	Mammalia	Ref1	GGTCCTTGCCCTCAAGGAGCTCACAGTCTATTGAGTTTCCTTTCTGACTTTCCCACTAGATTGTGAGCTCCTGGAGGGCAGGCACT	chr2 - 8777188 8777274	intron
mir-7975	ATGCAAAGAGCAGGAGGACAGGGGATTGATCTCCCAAGGGAGGTCCCCCGATCCGAGTCACGGCACCA	.(((...((...(((.....((((...(((((((....)))))))))))..)))...))...)))...	chr2 - 10434845 10434913	intron	94.12	1	-25.7	no		Primates	b		mir-7975	intron	94.12	B	0		Primates		ATGCAAAGAGCAGGAGGACAGGGGATTGATCTCCCAAGGGAGGTCCCCCGATCCGAGTCACGGCACCA	chr2 - 10434845 10434913	intron
mir-1248	TTTACCTTCTTGTATAAGCACTGTGCTAAAATTGCAGACACTAGGACTATGTCTTGGTTTTTGCAATAATGCTAGCAGAGTACACACAAGAAGAAAAGTAACAGCA	.....((((((((....(.(((.(((((..((((((((.((((((((...)))))))).)))))))).....))))).))).)..)))))))).............	chr2 - 10664101 10664207	intron	99.06	0	-34.5	yes	mir-1248	Mammals	b, c		mir-1248	intron	99.06	A	1	mir-1248	Mammalia	anotation	TTTACCTTCTTGTATAAGCACTGTGCTAAAATTGCAGACACTAGGACTATGTCTTGGTTTTTGCAATAATGCTAGCAGAGTACACACAAGAAGAAAAGTAACAGCA	chr2 - 10664101 10664207	intron
mir-128b	TGTGCAGTGGGAAGGGGGGCCGATACACTGTACGAGAGTGAGTAGCAGGTCTCACAGTGAACCGGTCTCTTTCCCTACTGTGTC	...((((((((.((((((((((...((((((..((((.(........).))))))))))...)))))))))).))))))))...	chr2 - 11668645 11668729	intron	100	0	-39.3	yes	mir-128	Vertebrates	a, b		mir-128b	intron	100	A	4	mir-128	Vertebrata	Ref1	TGTGCAGTGGGAAGGGGGGCCGATACACTGTACGAGAGTGAGTAGCAGGTCTCACAGTGAACCGGTCTCTTTCCCTACTGTGTC	chr2 - 11668645 11668729	intron
mir-548ay	AGAAGATGCTTACTACTAGGTTGGTGCAAAAGTAATTGTGGTTTTTGCATTTAAAGTAATGGCCAAAACCGCGATTACTCTTGCACGAACCTAACGGTAACACTTCT	(((((.((.(((((..((((((.((((((.(((((((((((((((.((..(((...)))..)).))))))))))))))).)))))).))))))..))))))))))))	chr2 + 14882280 14882387	space	100	0	-50.7	yes	mir-548	Primates	b, c		mir-548ay	space	100	A	1	mir-548	Primates	anotation	AGAAGATGCTTACTACTAGGTTGGTGCAAAAGTAATTGTGGTTTTTGCATTTAAAGTAATGGCCAAAACCGCGATTACTCTTGCACGAACCTAACGGTAACACTTCT	chr2 + 14882280 14882387	space
mir-622	AGAGGAGCTGGACAAGTACTGGTCTCAGCAGACTGAGGAGAGCACCGCAGTGGTCACCACACAGTCTGCTGAGGTTGGAGCTGCTGAGATG	..((.((((.........(((((((((((((((((.((.((.(((....))).)).))...))))))))))))))))))))).))......	chr2 - 15130139 15130230	intron	100	0	-37.7	no	mir-622	Primates	a, b		mir-622	intron	100	A	0	mir-622	Primates	Ref1	AGAGGAGCTGGACAAGTACTGGTCTCAGCAGACTGAGGAGAGCACCGCAGTGGTCACCACACAGTCTGCTGAGGTTGGAGCTGCTGAGATG	chr2 - 15130139 15130230	intron
mir-4442	GCGCCCTCCCTCTCTTCCCGGTGTGCAAATGTGTGTGTGCGGTGTTATGCCGGACAAGAGGGAGGTG	....(((((((((....((((((((((..(((......))).)).))))))))...)))))))))..	chr2 + 21747458 21747525	space	98.51	0	-29.2	no		Primates	b, c		mir-4442	space	98.51	A	0		Primates	anotation	GCGCCCTCCCTCTCTTCCCGGTGTGCAAATGTGTGTGTGCGGTGTTATGCCGGACAAGAGGGAGGTG	chr2 + 21747458 21747525	space
mir-4791	TAAGAACTGGATATGAAGACTGAAATAAGCTCCATATCAATGAGAATTTCAATGGGATTATGTATAGTCAATGTCCAGTAATTA	.....(((((((((...(((((..((((..(((((...(((....)))...))))).))))...))))).))))))))).....	chr2 + 28236345 28236429	space	96.43	1	-21.1	yes	mir-4791	Primates	b, c		mir-4791	space	96.43	B	6	mir-4791	Primates	anotation	TAAGAACTGGATATGAAGACTGAAATAAGCTCCATATCAATGAGAATTTCAATGGGATTATGTATAGTCAATGTCCAGTAATTA	chr2 + 28236345 28236429	space
mir-563	AGCAAAGAAGTGTGTTGCCCTCCAGGAAATGTGTGTTGCTCTGATGTAATTAGGCTGACATACATTTCCCTGGTAGCCA	..........((.((((((.....(((((((((((((((.(((((...))))))).)))))))))))))..))))))))	chr2 - 31692056 31692135	intron	100	0	-28.3	no	mir-563	Primates	a, b		mir-563	intron	100	A	0	mir-563	Primates	Ref1	AGCAAAGAAGTGTGTTGCCCTCCAGGAAATGTGTGTTGCTCTGATGTAATTAGGCTGACATACATTTCCCTGGTAGCCA	chr2 - 31692056 31692135	intron
mir-3134	TGTATCCAATGTGTAGTCTTTTATCCCTCACATGGAGTAAAATATGAGGGATAAAAGACTACATATTGGGTACA	((((((((((((((((((((((((((((((.((........)).))))))))))))))))))))))))))))))	chr2 + 31868773 31868847	intron	98.65	1	-48.1	no		Primates	b		mir-3134	intron	98.65	B	0		Primates		TGTATCCAATGTGTAGTCTTTTATCCCTCACATGGAGTAAAATATGAGGGATAAAAGACTACATATTGGGTACA	chr2 + 31868773 31868847	intron
mir-4270	ACAAACAGCTCCAGGGAGTCAGGGGAGGGCAGAAATAGATGGCCTTCCCCTGCTGGGAAGAAAGTGGGTC	.........(((((.....(((((((((((...........)))))))))))))))).............	chr2 + 32088568 32088638	intron	97.14	0	-26.2	no		Primates	b, c		mir-4270	intron	97.14	A	0		Primates	anotation	ACAAACAGCTCCAGGGAGTCAGGGGAGGGCAGAAATAGATGGCCTTCCCCTGCTGGGAAGAAAGTGGGTC	chr2 + 32088568 32088638	intron
mir-5704	TGATCTTGTTTAAGCCATCATCCCATTATGCTCAGTCCATGGATAAATATAACAGGATGATGGCCTAAACAAGACCA	((.(((((((((.((((((((((..(((((....(((....)))...)))))..)))))))))).))))))))).))	chr2 - 34234776 34234853	intron	93.51	1	-30.9	no		Primates	b, c		mir-5704	intron	93.51	B	0		Primates	anotation	TGATCTTGTTTAAGCCATCATCCCATTATGCTCAGTCCATGGATAAATATAACAGGATGATGGCCTAAACAAGACCA	chr2 - 34234776 34234853	intron
mir-6827	GTGGGAACCATAAGGGTCTGTGCTGTCTCTGAGCACCGTCTCTTCTGTTTCCCAGGATCC	.((((((.((.(((((.(.(((((.......))))).).))))).)).))))))......	chr2 - 36548421 36548481	intron	100	0	-23.3	yes	mir-6827	Primates	a, b		mir-6827	intron	100	A	1	mir-6827	Primates	Ref1	GTGGGAACCATAAGGGTCTGTGCTGTCTCTGAGCACCGTCTCTTCTGTTTCCCAGGATCC	chr2 - 36548421 36548481	intron
mir-4788	AATGAAGGATTATGGACCAGCTAAGGAAGGCATTAGGATCCTTTTTCTTGCCTCCCTTAGTTGGACCCTAATCCTTCGTT	((((((((((((.((.((((((((((.(((((..((((......))))))))).)))))))))).)).))))))))))))	chr2 + 36617782 36617862	space	95	2	-43.7	no	mir-4788	Primates	b, c		mir-4788	space	95	C	0	mir-4788	Primates	anotation	AATGAAGGATTATGGACCAGCTAAGGAAGGCATTAGGATCCTTTTTCTTGCCTCCCTTAGTTGGACCCTAATCCTTCGTT	chr2 + 36617782 36617862	space
mir-7975	GAGCAAAGAGCAGGAGGACAGGGGATTGATCTCCCAAGGGAGGTCCCCTGATCCGAGTCACGGCACCA	..((...((...(((...((((((((....((((....)))))))))))).)))...))...))....	chr2 - 44363936 44364004	space	95.59	1	-26.4	no		Primates	b		mir-7975	space	95.59	B	0		Primates		GAGCAAAGAGCAGGAGGACAGGGGATTGATCTCCCAAGGGAGGTCCCCTGATCCGAGTCACGGCACCA	chr2 - 44363936 44364004	space
mir-7975	GAGCAAAGAGCAGGAGGACAGGGGATTGATCTCCCAAGGGAGGTCCTCTGATCCGAGTCACGGCACCA	..((...((...(((...((((((((....((((....)))))))))))).)))...))...))....	chr2 - 46096074 46096142	space	94.12	1	-23.4	no		Primates	b		mir-7975	space	94.12	B	0		Primates		GAGCAAAGAGCAGGAGGACAGGGGATTGATCTCCCAAGGGAGGTCCTCTGATCCGAGTCACGGCACCA	chr2 - 46096074 46096142	space
mir-7975	GAGCAAAGAGCAGGAGGACAAGGGATTGATGTCCCAAGGGAGGTCCCCTGATCCTAGTCACGGCACCA	..((...((..((((.....((((...(((.(((....))).)))))))..))))..))...))....	chr2 + 56207305 56207373	space	94.12	0	-22	no		Primates	b		mir-7975	space	94.12	A	0		Primates		GAGCAAAGAGCAGGAGGACAAGGGATTGATGTCCCAAGGGAGGTCCCCTGATCCTAGTCACGGCACCA	chr2 + 56207305 56207373	space
mir-7705	AATGGCTCAAAATGTCAGTTCTGTTTTAAGTAACAGAATTGATAACTGAGCAAGGAA	....(((((...(((((((((((((......)))))))))))))..)))))......	chr2 - 57716421 57716478	space	96.49	2	-22.4	no		Primates	b		mir-7705	space	96.49	C	0		Primates		AATGGCTCAAAATGTCAGTTCTGTTTTAAGTAACAGAATTGATAACTGAGCAAGGAA	chr2 - 57716421 57716478	space
mir-15b	TTGAGGCCTTAAAGTACTGTAGCAGCACATCATGGTTTACATACTACAGTCAAGATGCGAATCATTATTTGCTGCTCTAGAAATTTAAGGAAATTCAT	.((((.(((((((...(((.(((((((.((.(((((((.(((.((.......))))).))))))).)).))))))).)))...)))))))...)))).	chr2 + 62802629 62802727	intron	100	0	-29.3	yes	mir-15	Vertebrates	a, b		mir-15b	intron	100	A	1	mir-15	Vertebrata	Ref1	TTGAGGCCTTAAAGTACTGTAGCAGCACATCATGGTTTACATACTACAGTCAAGATGCGAATCATTATTTGCTGCTCTAGAAATTTAAGGAAATTCAT	chr2 + 62802629 62802727	intron
mir-16-2	GTTCCACTCTAGCAGCACGTAAATATTGGCGTAGTGAAATATGTATTAAACACCAATATTACTGTGCTGCTTCAGTGTGAC	(((.((((..(((((((((..((((((((.((((((.......))))..)).))))))))..)))))))))..)))).)))	chr2 + 62802786 62802867	intron	100	0	-29.3	yes	mir-15	Vertebrates	a, b		mir-16-2	intron	100	A	1	mir-15	Vertebrata	Ref1	GTTCCACTCTAGCAGCACGTAAATATTGGCGTAGTGAAATATGTATTAAACACCAATATTACTGTGCTGCTTCAGTGTGAC	chr2 + 62802786 62802867	intron
mir-551b	AGATGTGCTCTCCTGGCCCATGAAATCAAGCGTGGGTGAGACCTGGTGCAGAACAGGAAGGCGACCCATACTTGGTTTCAGAGGCTGCGAGAATA	........((((.(((((..((((((((((.((((((....((((........))))......)))))).))))))))))..))))).))))...	chr2 + 72685883 72685978	intron	100	0	-40.5	no	mir-551	Vertebrates	a, b		mir-551b	intron	100	A	0	mir-551	Vertebrata	Ref1	AGATGTGCTCTCCTGGCCCATGAAATCAAGCGTGGGTGAGACCTGGTGCAGAACAGGAAGGCGACCCATACTTGGTTTCAGAGGCTGCGAGAATA	chr2 + 72685883 72685978	intron
mir-6828	GACTCAGGAAGCAAGAGAACCCCGTGGTCTAACTTTTCCCATCTGCTCTCTTGTTCCCAG	......((.(((((((((.....((((...........))))....))))))))).))..	chr2 + 74636469 74636529	intron	95	0	-15.5	no		Primates	b		mir-6828	intron	95	A	0		Primates		GACTCAGGAAGCAAGAGAACCCCGTGGTCTAACTTTTCCCATCTGCTCTCTTGTTCCCAG	chr2 + 74636469 74636529	intron
mir-569	GGTATTGTTAGATTAATTTTGTGGGACATTAACAACAGCATCAGCAGCAACATCAGCTTTAGTTAATGAATCCTGGAAAGTTAAGTGACTTTATTT	.(((..((((..((((((((.((((((((((((...(((................)))...)))))))..))))).)))))))).))))..)))..	chr2 - 75306259 75306355	intron	100	0	-22.3	no	mir-569	Primates	a, b		mir-569	intron	100	A	0	mir-569	Primates	Ref1	GGTATTGTTAGATTAATTTTGTGGGACATTAACAACAGCATCAGCAGCAACATCAGCTTTAGTTAATGAATCCTGGAAAGTTAAGTGACTTTATTT	chr2 - 75306259 75306355	intron
mir-7182	ATCGCAGTTTTAAAATCCATGCCTTTGGAATATAAAAAGCATGGATTTTAAAACTGGGATGC	(((.((((((((((((((((((.(((........))).)))))))))))))))))).)))..	chr2 - 77599043 77599105	space	98.39	0	-31.1	no		Cercopithecidae	a, b		mir-7182	space	98.39	A	0		Cercopithecidae	Ref1	ATCGCAGTTTTAAAATCCATGCCTTTGGAATATAAAAAGCATGGATTTTAAAACTGGGATGC	chr2 - 77599043 77599105	space
mir-7975	GAGCAAAGAGCAGGAAGACAGGGGATTAATCTCCCAAGGGAGGTCCCCTGATCCGAGTCACGGCACCA	..((...((...(((...((((((((....((((....)))))))))))).)))...))...))....	chr2 - 80414903 80414971	space	94.12	1	-26.4	no		Primates	b		mir-7975	space	94.12	B	0		Primates		GAGCAAAGAGCAGGAAGACAGGGGATTAATCTCCCAAGGGAGGTCCCCTGATCCGAGTCACGGCACCA	chr2 - 80414903 80414971	space
mir-548h-2	GTATTAGTTGGTGCAAAAGTAATTGCAGTTTTTGTCATTACTTTTATATGGCAAAAACCACAATTACTTTTGCACCAACCTAATACTAAC	(((((((((((((((((((((((((..(((((((((((.........)))))))))))..)))))))))))))))))).)))))))....	chr2 - 85349169 85349259	space	94.32	2	-46.5	no	mir-548	Primates	b		mir-548h-2	space	94.32	C	0	mir-548	Primates		GTATTAGTTGGTGCAAAAGTAATTGCAGTTTTTGTCATTACTTTTATATGGCAAAAACCACAATTACTTTTGCACCAACCTAATACTAA	chr2 - 85349169 85349259	space
mir-1268a	TAGCCGGGCGTGGTGGTGGGCACCTGTAGTCCCAGCTACTTTGGAGGCTGAG	(((((...((.(((((((((.((.....)))))).))))).))..)))))..	chr2 + 88732142 88732194	space	94.23	1	-19.7	no	mir-1268	Primates	b		mir-1268a	space	94.23	B	0	mir-1268	Primates		TAGCCGGGCGTGGTGGTGGGCACCTGTAGTCCCAGCTACTTTGGAGGCTGAG	chr2 + 88732142 88732194	space
mir-1224	GTGAGGACTCGGGAGGTGGAGGGTGGCGCCGCCGGGGCCAGGCGCTGTCTAAGCTCGCTTCTCCCCCCACCTCCTCTCTCCTCAG	.((((((...(((((((((.(((((((.((...)).))))((((((.....)))..)))....))))))))))))...)))))).	chr2 + 88926935 88927020	intron	100	0	-43.9	no	mir-1224	Mammals	a, b		mir-1224	intron	100	A	0	mir-1224	Mammalia	Ref1	GTGAGGACTCGGGAGGTGGAGGGTGGCGCCGCCGGGGCCAGGCGCTGTCTAAGCTCGCTTCTCCCCCCACCTCCTCTCTCCTCAG	chr2 + 88926935 88927020	intron
mir-10001	GAGGGCGGGCGGGGCCGGGGGCTCCTCCCTGCCCGCCGCCACCTCCTCCCTCCC	(((((.(((.(((((.(.((((........)))).).))).)).))))))))..	chr2 - 89007609 89007663	space	96.3	0	-32.8	no		Mammals	b		mir-10001	space	96.3	A	0		Mammalia		GAGGGCGGGCGGGGCCGGGGGCTCCTCCCTGCCCGCCGCCACCTCCTCCCTCCC	chr2 - 89007609 89007663	space
mir-548aq	AGAAGTAATTGCGGTTTTTGCCATTACTTTCAGTGGCAAAAACCGCAATTACTTTTGC	(((((((((((((((((((((((((......)))))))))))))))))))))))))..	chr2 - 90495137 90495195	intron	93.1	1	-36.3	no	mir-548	Primates	a		mir-548aq	intron	93.1	B	0	mir-548	Primates	Ref2	AGAAGTAATTGCGGTTTTTGCCATTACTTTCAGTGGCAAAAACCGCAATTACTTTTGC	chr2 - 90495137 90495195	intron
mir-26c	CAGGCCCGCGTCCCCGTGCAAGTAACCAAGAATAGGCCCATTGGGACCTGCACAGCCTATCCTGGATTACTTGAACGAGGCCACGGCCTT	.(((((.(.(.((.(((.((((((((((.((.(((((....((.......))..))))))).))).))))))).))).)).).)))))).	chr2 - 92845801 92845891	space	96.67	0	-33.4	no	mir-26	Vertebrates	b, c		mir-26c	space	96.67	A	0	mir-26	Vertebrata	anotation	CAGGCCCGCGTCCCCGTGCAAGTAACCAAGAATAGGCCCATTGGGACCTGCACAGCCTATCCTGGATTACTTGAACGAGGCCACGGCCTT	chr2 - 92845801 92845891	space
mir-26a-1	GTGGCCTCGTTCAAGTAATCCAGGATAGGCTGTGCAGGTCCCAATGGGCCTATTCTTGGTTACTTGCACGGGGACGC	(((.((((((.(((((((((.((((((((((...............)))))))))).))))))))).)))))).)))	chr2 + 92845807 92845884	intron	100	0	-37.3	yes	mir-26	Vertebrates	a, b		mir-26a-1	intron	100	A	1	mir-26	Vertebrata	Ref1	GTGGCCTCGTTCAAGTAATCCAGGATAGGCTGTGCAGGTCCCAATGGGCCTATTCTTGGTTACTTGCACGGGGACGC	chr2 + 92845807 92845884	intron
mir-138-1	AGCTGGTGTTGTGAATCAGGCCGTTGCCAATCAGAGAACGGCTACTTCACAACACCAGGGCC	..(((((((((((((...(((((((..(.....)..)))))))..)))))))))))))....	chr2 + 99018273 99018335	space	100	0	-31.8	yes	mir-138	Vertebrates	b, c		mir-138-1	space	100	A	1	mir-138	Vertebrata	anotation	AGCTGGTGTTGTGAATCAGGCCGTTGCCAATCAGAGAACGGCTACTTCACAACACCAGGGCC	chr2 + 99018273 99018335	space
mir-1226	GTGAGGGCATGCAGGCCTGGATGGGGCAGCTGGGATGGTCCAAAAGGGTGGCCTCACCAGCCCTGTGTTCCCTAG	...((((.(((((((.((((.((((((.((((((....))).....))).)))))))))).))))))).))))..	chr2 + 102921254 102921329	intron	100	0	-35.4	yes	mir-1226	Primates	a, b		mir-1226	intron	100	A	1	mir-1226	Primates	Ref1	GTGAGGGCATGCAGGCCTGGATGGGGCAGCTGGGATGGTCCAAAAGGGTGGCCTCACCAGCCCTGTGTTCCCTAG	chr2 + 102921254 102921329	intron
mir-4443	GGTGGGGGTTGGAGGCATGGGTTTTAGAACCTATCCCTTTCTAGCCCTGAGCA	(.(.(((((((((((.(((((((....))))))).))..))))))))).).).	chr2 + 103277302 103277355	space	98.11	1	-25.1	no		Primates	b, c		mir-4443	space	98.11	B	0		Primates	anotation	GGTGGGGGTTGGAGGCATGGGTTTTAGAACCTATCCCTTTCTAGCCCTGAGCA	chr2 + 103277302 103277355	space
mir-6823	CAAGGTCAGGGTTGGTAGGGGTTGCTGTTGCTGTGAAAGCTGAGCCTCTCCTTTCCGCCAG	.........(((.((.(((((..(((...(((.....)))..)))..)))))..)))))..	chr2 - 103669802 103669863	intron	96.72	0	-19.2	no		Primates	b, c		mir-6823	intron	96.72	A	0		Primates	anotation	CAAGGTCAGGGTTGGTAGGGGTTGCTGTTGCTGTGAAAGCTGAGCCTCTCCTTTCCGCCAG	chr2 - 103669802 103669863	intron
mir-711	ACTGACTTTGAGTCTCTCCTCAGGGTGCTGCAGGCAAAGCTGGGGACCCAGGGAGAGACGTAAGTGAGGGGAGATG	.((.((((...(((((((((..((((.((.(((......))).)))))).)))))))))..)))).))........	chr2 - 103699227 103699303	intron	100	0	-35.6	no	mir-711	Mammals	a		mir-711	intron	100	A	0	mir-711	Mammalia	Ref1	ACTGACTTTGAGTCTCTCCTCAGGGTGCTGCAGGCAAAGCTGGGGACCCAGGGAGAGACGTAAGTGAGGGGAGATG	chr2 - 103699227 103699303	intron
mir-6824	GAGGTGTAGGGGAGGTTGGGCCAGGGGTGCCGTCACTGTCTCTCTCTGGTCTTGCCACCCCAG	........((((.(((.((((((((((.(.(......).).).))))))))).))).))))..	chr2 - 103760424 103760487	intron	95.24	0	-26.8	no		Primates	b, c		mir-6824	intron	95.24	A	0		Primates	anotation	GAGGTGTAGGGGAGGTTGGGCCAGGGGTGCCGTCACTGTCTCTCTCTGGTCTTGCCACCCCAG	chr2 - 103760424 103760487	intron
mir-4793	TTTCTCCTCGCTGCCCGCACATCCTGCTCCACAGGGCAGAGGGAGGCCAAGAAGACCTCCGCACTGTGAGTTGGCTGGCCGGAGGAA	....(((((.(.(((.((.((....((((.((((.((.((((.............)))).)).)))))))))))).))).)))))).	chr2 - 103770935 103771022	overlap	97.7	0	-33.9	no		Primates	a, b		mir-4793	overlap	97.7	A	0		Primates	Ref2	TTTCTCCTCGCTGCCCGCACATCCTGCTCCACAGGGCAGAGGGAGGCCAAGAAGACCTCCGCACTGTGAGTTGGCTGGCCGGAGGAA	chr2 - 103770935 103771022	overlap
mir-425	GAAAGCGCTTTGGAATGACACGATCACTCCCGTTGAGTGGGCCCCCGAGAAGCCATCGGGAATGTCGTGTCCGCCCAGTGCTCTTTC	(((((.((.((((...(((((((((((((.....)))))....(((((.......)))))...))))))))...)))).)).)))))	chr2 - 104189414 104189501	intron	100	0	-34.6	yes	mir-425	Vertebrates	a, b		mir-425	intron	100	A	1	mir-425	Vertebrata	Ref1	GAAAGCGCTTTGGAATGACACGATCACTCCCGTTGAGTGGGCCCCCGAGAAGCCATCGGGAATGTCGTGTCCGCCCAGTGCTCTTTC	chr2 - 104189414 104189501	intron
mir-191	GCCAACGGCTGGACAGCGGGCAACGGAATCCCAAAAGCAGCTGTTGTCTCCAGAGCATTCCAGCTGCGCTTGGATTTCGTCCCCTGCTCTCCTGCCTGAGCAGCGCCCTGGCC	((((..(((.(((.((((((..(((((((((.((..(((((((.(((.......)))...)))))))..)))))))))))..)))))).))).))))).)).((......)).	chr2 - 104189867 104189980	intron	100	0	-50.2	yes	mir-191	Vertebrates	a, b		mir-191	intron	100	A	1	mir-191	Vertebrata	Ref1	GCCAACGGCTGGACAGCGGGCAACGGAATCCCAAAAGCAGCTGTTGTCTCCAGAGCATTCCAGCTGCGCTTGGATTTCGTCCCCTGCTCTCCTGCCTGAGCAGCGCCCTGGCC	chr2 - 104189867 104189980	intron
mir-191b	GGACGAAATCCAAGCGCAGCTGGAATGCTCTGGAGACAACAGCTGCTTTTGGGATTCCGTTGCC	.((((.((((((((.(((((((.....((....))....))))))).))).))))).))))...	chr2 + 104189898 104189962	intron	98.44	1	-22.2	no	mir-191	Vertebrates	b, c		mir-191b	intron	98.44	B	0	mir-191	Vertebrata	anotation	GGACGAAATCCAAGCGCAGCTGGAATGCTCTGGAGACAACAGCTGCTTTTGGGATTCCGTTGCC	chr2 + 104189898 104189962	intron
mir-6890	TGGGCCATGGGATAGGGCAGAGTAGGGCTGGATGGTAGGGCCCACTGCCTATGCCCCACAG	((((.(((......((((((....(((((.........))))).))))))))).))))...	chr2 - 104265402 104265463	intron	98.36	0	-22	no		Primates	b, c		mir-6890	intron	98.36	A	0		Primates	anotation	TGGGCCATGGGATAGGGCAGAGTAGGGCTGGATGGTAGGGCCCACTGCCTATGCCCCACAG	chr2 - 104265402 104265463	intron
mir-4271	AAATCTCTCTCCATATCTTTCCTGCAGCCCCCAGGTTGGGGGGAAGAAAAGGTGGGGAATTAGATTC	.(((((.(((((((.((((((((.(((((....))))).))))))))....)))))))...))))).	chr2 + 104443510 104443577	space	98.51	0	-29.5	no		Primates	b, c		mir-4271	space	98.51	A	0		Primates	anotation	AAATCTCTCTCCATATCTTTCCTGCAGCCCCCAGGTTGGGGGGAAGAAAAGGTGGGGAATTAGATTC	chr2 + 104443510 104443577	space
mir-5193	CCTAGGAAAGGCTGCTGGTAACTGGGATGGGGGTTGGGGGTAGGTAAGAAGTCTCTCACTCCTCCTCTACCTCATTCCAGTTCCATCACCTGAAGTGGACCTGTTGGGA	.(((....(((.((.(((.(((((((((((((...(((((..(((.(((....))).))))))))....)))))))))))))))).)))))....))).((....))..	chr2 - 105048753 105048862	intron	96.33	1	-44.1	no		Primates	b, c		mir-5193	intron	96.33	B	0		Primates	anotation	CCTAGGAAAGGCTGCTGGTAACTGGGATGGGGGTTGGGGGTAGGTAAGAAGTCTCTCACTCCTCCTCTACCTCATTCCAGTTCCATCACCTGAAGTGGACCTGTTGGGA	chr2 - 105048753 105048862	intron
mir-6872	GTGGGTCTCGTATCAGGAGGCGAGGCCAGGACCCGCTGACCCATGCCTCCTGCCGCGGTCAG	.......((((..(((((((((.((.(((......)))..)).)))))))))..))))....	chr2 + 105517922 105517984	intron	96.77	0	-26.3	no		Primates	b, c		mir-6872	intron	96.77	A	0		Primates	anotation	GTGGGTCTCGTATCAGGAGGCGAGGCCAGGACCCGCTGACCCATGCCTCCTGCCGCGGTCAG	chr2 + 105517922 105517984	intron
mir-4787	CGGTCCAGACGTGGAGGGGGTGGCGGCGGCATCCCGGACGGCCTGTGAGGGATGCGCCGCCCACTGCCCCGCGCCGCCTGACCG	(((((..(.(((((.((.((((((((((.((((((..((.....))..))))))))))).))))).))))))).)....)))))	chr2 + 105928947 105929031	5UTR	98.81	0	-51.2	no		Primates	a, b		mir-4787	5utr	98.81	A	0		Primates	Ref2	CGGTCCAGACGTGGAGGGGGTGGCGGCGGCATCCCGGACGGCCTGTGAGGGATGCGCCGCCCACTGCCCCGCGCCGCCTGACCG	chr2 + 105928947 105929031	5UTR
mir-9942	CCGGCCCCCGCGGCCCCGCCTTCTGGAGAACGCCTCGGCGCGCGGCCGCCGGAGCCGCTGTTTAATTGGGGCTGTCAGGCCGCGGTGCGCGCGGAGGGCCGGGCGGGCGGGACGGAGGCCGG	(((((((((((.((((.(((((((((((.....))).((((((.((.(((..((((.(.........).))))....))).)).)))))).)))))))).))))..))))).....))))))	chr2 - 107317913 107318035	space	95.04	0	-75	no		Primates	b		mir-9942	space	95.04	A	0		Primates		CCGGCCCCCGCGGCCCCGCCTTCTGGAGAACGCCTCGGCGCGCGGCCGCCGGAGCCGCTGTTTAATTGGGGCTGTCAGGCCGCGGTGCGCGCGGAGGGCCGGGCGGGCGGGACGGAGGCCGG	chr2 - 107317913 107318035	space
let-7g	CCTTTTGCCTGATTCCAGGCTGAGGTAGTAGTTTGTACAGTTTGAGGGTCTATGATACCACCCGGTACAGGAGATAACTGTACAGGCCACTGCCTTGCCAGGAACAGCGCG	......(((((.((((.(((.((((((((.((((((((((((.....((((.((.((((....))))))..)))))))))))))))).))))))))))).))))))).)).	chr2 - 107532432 107532543	intron	100	0	-50.5	yes	let-7	Vertebrates	a, b		let-7g	intron	100	A	1	let-7	Vertebrata	Ref1	CCTTTTGCCTGATTCCAGGCTGAGGTAGTAGTTTGTACAGTTTGAGGGTCTATGATACCACCCGGTACAGGAGATAACTGTACAGGCCACTGCCTTGCCAGGAACAGCGCG	chr2 - 107532432 107532543	intron
mir-135a-1	AGGCCTCGCTGTTCTCTATGGCTTTTTATTCCTATGTGATTCTACTGCTCACTCATATAGGGATTGGAGCCGTGGCGCACGGCGGGGACA	...(((((((((.(.((((((((((..((((((((((((.............)))))))))))).)))))))))).).)))))))))...	chr2 - 107565399 107565489	space	100	0	-44.1	yes	mir-135	Vertebrates	a, b		mir-135a-1	space	100	A	1	mir-135	Vertebrata	Ref1 Ref2	AGGCCTCGCTGTTCTCTATGGCTTTTTATTCCTATGTGATTCTACTGCTCACTCATATAGGGATTGGAGCCGTGGCGCACGGCGGGGACA	chr2 - 107565399 107565489	space
mir-3938	AGATTATCTACAAGGGAATTTTTTTAATTTTTAAAATTCCCTTATGGATAATCTGG	((((((((((.(((((((((((..........))))))))))).))))))))))..	chr2 - 111167534 111167590	intron	100	0	-23.8	no	mir-3938	Primates	a, b		mir-3938	intron	100	A	0	mir-3938	Primates	Ref1	AGATTATCTACAAGGGAATTTTTTTAATTTTTAAAATTCCCTTATGGATAATCTGG	chr2 - 111167534 111167590	intron
mir-3136	AAGTAAAAATTAATATGAAACTGACTGAATAGGTAGGGTAATTTTTCAGTGACTGCACATGGCCCTACATATTCAGTCAGTTTCATATTAGTTTATTTCATATTGATAAGT	......(((((((((((((((((((((((((.(((((((.......(((...)))......))))))).))))))))))))))))))))))))).................	chr2 - 124702379 124702490	intron	95.5	1	-46.2	no	mir-3136	Primates	b, c		mir-3136	intron	95.5	B	0	mir-3136	Primates	anotation	AAGTAAAAATTAATATGAAACTGACTGAATAGGTAGGGTAATTTTTCAGTGACTGCACATGGCCCTACATATTCAGTCAGTTTCATATTAGTTTATTTCATATTGATAAGT	chr2 - 124702379 124702490	intron
mir-1284	TATAAGCCAGTTTAATGTTTTCTGTACAGACCCTGGCTTTTCTTAAATTTTATATATTGGAAAGCCCATGTTTGTATTGGAAACTGCTGGTTTCTTTCATATTGAAAATC	...((((((((.....((((((.((((((((...((((((((................))))))))...)))))))).)))))).)))))))).(((((...)))))...	chr2 - 127144158 127144268	intron	100	0	-33.1	yes	mir-1284	Mammals	a, b		mir-1284	intron	100	A	1	mir-1284	Mammalia	Ref1	TATAAGCCAGTTTAATGTTTTCTGTACAGACCCTGGCTTTTCTTAAATTTTATATATTGGAAAGCCCATGTTTGTATTGGAAACTGCTGGTTTCTTTCATATTGAAAATC	chr2 - 127144158 127144268	intron
mir-4790	CAATGTGACATCGCTTTACCATTCATGTTCACTGAAAGGTAGATTTTAAAAACATGAATGGTAAAGCGATGTCACATTG	(((((((((((((((((((((((((((((...(((((......)))))..)))))))))))))))))))))))))))))	chr2 - 136135822 136135901	space	100	0	-48	no		Primates	b, c		mir-4790	space	100	A	0		Primates	anotation	CAATGTGACATCGCTTTACCATTCATGTTCACTGAAAGGTAGATTTTAAAAACATGAATGGTAAAGCGATGTCACATTG	chr2 - 136135822 136135901	space
mir-12127	CTGAGTCATCTCAGGTCCTGAGCTCTGCTCTGCCGCCTGCTGGTGCCTTGTAAAGGTATATTCGTTACAGGCCCTAGAGCTTCTAATGGTCCAGGGTTAAGTGAGAGGAGACTGTATTTTGT	...((((.(((((..(((((.(((..((((((..(((((.(((((((((...)))))))...))...)))))..)))))).......))).))))).....)))))...)))).........	chr2 + 141269819 141269941	3UTR	97.06	1	-35.4	no		Primates	b, c		mir-12127	3utr	97.06	B	0		Primates	anotation	TCAGGTCCTGAGCTCTGCTCTGCCGCCTGCTGGTGCCTTGTAAAGGTATATTCGTTACAGGCCCTAGAGCTTCTAATGGTCCAGGGTTAAGTGAGAGGAGAC	chr2 + 141269829 141269931	3UTR
mir-378b	GGCCTCAGTTTCCTCCGCTGAAGAATGGGAGGAGGCTGGTCATTGAGTCTTCAAGGCTAGTGGAAAGAGCACTGGACTTGAAGGCAGAAGGACCCAACTTGCGTCCTGG	((((..((((((((((.(........))))))))))))))).....(((((((((.((((((.......)))))).)))))))))...(((((.((...)).)))))..	chr2 + 141319252 141319361	space	97.25	2	-48.5	no	mir-378	Mammals	b, c		mir-378b	space	97.25	C	0	mir-378	Mammalia	anotation	GGCCTCAGTTTCCTCCGCTGAAGAATGGGAGGAGGCTGGTCATTGAGTCTTCAAGGCTAGTGGAAAGAGCACTGGACTTGAAGGCAGAAGGACCCAACTTGCGTCCTGG	chr2 + 141319252 141319361	space
mir-885	CCGCACTCTCTCCATTACACTACCCTGCCTCTTCTCCATGAGAGGCAGCGGGGTGTAGTGGATAGAGCACGGGT	(((..((((.(((((((((((.(((((((((((......))))))))).))))))))))))).))))..)))..	chr2 - 141385913 141385987	intron	100	0	-44.3	no	mir-885	Mammals	a, b		mir-885	intron	100	A	0	mir-885	Mammalia	Ref1	CCGCACTCTCTCCATTACACTACCCTGCCTCTTCTCCATGAGAGGCAGCGGGGTGTAGTGGATAGAGCACGGGT	chr2 - 141385913 141385987	intron
mir-622	AGAGGAGCTGGACAAGTACTGGTCTCAGCAGATTGAGGAGAGCACCACAGTGGTCACCATGTAGTCTGCCGAGGTTGGAGCTGCTGAGATG	..((.((((.........((((((((.((((((((.((.((.(((....))).)).))...)))))))).)))))))))))).))......	chr2 - 143838348 143838439	intron	93.41	2	-28.9	no	mir-622	Primates	a		mir-622	intron	93.41	C	0	mir-622	Primates	Ref1	AGAGGAGCTGGACAAGTACTGGTCTCAGCAGATTGAGGAGAGCACCACAGTGGTCACCATGTAGTCTGCCGAGGTTGGAGCTGCTGAGATG	chr2 - 143838348 143838439	intron
mir-6083	GTAGAAAGAGTCCAGATTCTGGGAAGGTGGAAAGGGAGCAGGAGCATCATCATTAAGAGGGTCAGGTACCTTTGCTCTTATATCAGAGGCTGTGGGCTCCCTACAG	((((...(((((((..((((((..(((.(.(((((..((..((.(.((........)).).))..)).))))).).)))...))))))....))))))).))))..	chr2 - 147757440 147757546	intron	95.28	0	-35.8	no		Primates	b, c		mir-6083	intron	95.28	A	0		Primates	anotation	GTAGAAAGAGTCCAGATTCTGGGAAGGTGGAAAGGGAGCAGGAGCATCATCATTAAGAGGGTCAGGTACCTTTGCTCTTATATCAGAGGCTGTGGGCTCCCTACAG	chr2 - 147757440 147757546	intron
mir-6529b	GAAACCATACGCTCTTAAAGAGGTAAAAGGCACAGGCTTCATTGACATTGACGCACTCTGCGCCTCTGATCTCTCAAGAGAACAGGTTTT	((((((.....(((((..((((((...((((.(((((.(((.......))).))...))).))))...)))))).)))))....))))))	chr2 - 152102620 152102710	space	97.78	0	-28.7	no	mir-6529	Mammals	b, c		mir-6529b	space	97.78	A	0	mir-6529	Mammalia	anotation	GAAACCATACGCTCTTAAAGAGGTAAAAGGCACAGGCTTCATTGACATTGACGCACTCTGCGCCTCTGATCTCTCAAGAGAACAGGTTTT	chr2 - 152102620 152102710	space
mir-6529	GAGAGATCAGAGGCGCAGAGTGCGTCAATGTCAATGAAGCCTGTGCCTTTTACCTCTTTAA	(((((...((((((((((...((.(((.......))).))))))))))))...)))))...	chr2 + 152102635 152102696	intron	100	0	-21.4	yes	mir-6529	Mammals	a, b		mir-6529	intron	100	A	3	mir-6529	Mammalia	Ref1	GAGAGATCAGAGGCGCAGAGTGCGTCAATGTCAATGAAGCCTGTGCCTTTTACCTCTTTAA	chr2 + 152102635 152102696	intron
mir-4447	GTTCTAGAGCATGGTTTCTCATCATTTGCACTACTGATATTTGGGGTCAGATAATTGTTTGTGGTGGGGGCTGTTGTTTGCATTGTAGGAT	((((((((((((((((((.((((((..(((.(((((((.......))))).))..)))..))))))))))))).)))))......))))))	chr2 + 155367963 155368054	space	98.9	0	-21	no		Primates	b		mir-4447	space	98.9	A	0		Primates		GTTCTAGAGCATGGTTTCTCATCATTTGCACTACTGATATTTGGGGTCAGATAATTGTTTGTGGTGGGGGCTGTTGTTTGCATTGTAGGAT	chr2 + 155367963 155368054	space
mir-4796	GGCTCAAGTCATGGCAGTAAATTTGTGTCTATACTCTGCCACTTTACTTTTGGCCTCAAGTCATTGCGGTAAAGTGGCAGAGTGTAGACACAAATTTAGGCCTTCTGACTCC	......(((((.(((..(((((((((((((((((((((((((((((((..((((.....))))....))))))))))))))))))))))))))))))).)))...)))))..	chr2 + 157513422 157513534	intron	100	0	-62.4	yes	mir-4796	Primates	a, b		mir-4796	intron	100	A	1	mir-4796	Primates	Ref1	GGCTCAAGTCATGGCAGTAAATTTGTGTCTATACTCTGCCACTTTACTTTTGGCCTCAAGTCATTGCGGTAAAGTGGCAGAGTGTAGACACAAATTTAGGCCTTCTGACTCC	chr2 + 157513422 157513534	intron
mir-568	ATATACACTATATTATGTATAAATGTATACACACTTCCTATATGTATCCACATATATATAGTGTATATATTATACATGTATAGGTGTGTATATG	(((((((((((((.((((((((.(((((((((......(((((((....)))))))....)))))))))))))))))))))).))))))))...	chr2 + 157948393 157948487	intron	100	0	-31.4	no	mir-568	Mammals	a, b		mir-568	intron	100	A	0	mir-568	Mammalia	Ref1	ATATACACTATATTATGTATAAATGTATACACACTTCCTATATGTATCCACATATATATAGTGTATATATTATACATGTATAGGTGTGTATATG	chr2 + 157948393 157948487	intron
mir-4446	TACTTCAGGATTGATGAGTCCGGTGGCTCTGGTCCATTTCCCTGCCATTCCCTTGGCTTCAATTTACTCCCAGGGCTGGCAGTGAGATGGGTCAAGGCTCACACCTTCAC	.......(((((....)))))(((((((.(((((((((((.((((((...((((((.............)))))).)))))).))))))))))).)))...)))).....	chr2 - 158672418 158672528	intron	100	0	-43.7	yes	mir-4446	Primates	a, b		mir-4446	intron	100	A	1	mir-4446	Primates	Ref1	TACTTCAGGATTGATGAGTCCGGTGGCTCTGGTCCATTTCCCTGCCATTCCCTTGGCTTCAATTTACTCCCAGGGCTGGCAGTGAGATGGGTCAAGGCTCACACCTTCAC	chr2 - 158672418 158672528	intron
mir-9900	ATCTGAAAGGCAGGATGTGGCCTCTAAGAACCCGCTCTTACTTCTAAAAGGACAGTTCCTAAGAGACTGCATCAAGTCTTCAGCTCACAAAGA	..(((((.(((..(((((((.((((..((((...(.(((........))))...))))...)))).)))))))..))))))))..........	chr2 - 159469656 159469749	space	97.85	1	-24.6	no		Primates	b, c		mir-9900	space	97.85	B	0		Primates	anotation	ATCTGAAAGGCAGGATGTGGCCTCTAAGAACCCGCTCTTACTTCTAAAAGGACAGTTCCTAAGAGACTGCATCAAGTCTTCAGCTCACAAAGA	chr2 - 159469656 159469749	space
mir-567	GGATTCTTACAGGACACTATGTTCTTCCAGGACAGAACATTCTTTGCTATTTTGTACTGGAAGAACATGCAAAACTTTAAAAAAAGTTATTGCT	(..((((...))))..).((((((((((((.((((((((.....))...)))))).))))))))))))((((((((((....)))))).)))).	chr2 - 160080624 160080718	intron	100	0	-28.6	no	mir-567	Primates	a		mir-567	intron	100	A	0	mir-567	Primates	Ref1	GGATTCTTACAGGACACTATGTTCTTCCAGGACAGAACATTCTTTGCTATTTTGTACTGGAAGAACATGCAAAACTTTAAAAAAAGTTATTGCT	chr2 - 160080624 160080718	intron
mir-8060	TTTAAATCCTGTTTTTCCAACTTACTATTCTGGTCAGATATCCCATGAAGCAGTGGGTGGGAGGACAGGAGAAACC	......(((((((((((((.((((((.((((((.........))).)))..)))))))))))))))))))......	chr2 - 175574411 175574487	space	94.74	1	-28.3	no		Primates	b, c		mir-8060	space	94.74	B	0		Primates	anotation	TTTAAATCCTGTTTTTCCAACTTACTATTCTGGTCAGATATCCCATGAAGCAGTGGGTGGGAGGACAGGAGAAACC	chr2 - 175574411 175574487	space
mir-7183	TGAATTGGTATTGCAAATGACATGTATGCAAATTGGCATTTGCATTACCAATACACA	((.(((((((.((((((((.((...........)).)))))))).))))))).))..	chr2 - 182504543 182504600	intron	100	0	-19.4	no		Cercopithecidae	a, b		mir-7183	intron	100	A	0		Cercopithecidae	Ref1	TGAATTGGTATTGCAAATGACATGTATGCAAATTGGCATTTGCATTACCAATACACA	chr2 - 182504543 182504600	intron
mir-3923	GGTAGAGTGAGCTCTAATCCAATATTACTAGTTTCTTTATAAGAAGAGGAAACTAATAATATTGGATTAGAGCTCACTCTACT	(((((((((((((((((((((((((((.((((((((((.......)))))))))).)))))))))))))))))))))))))))	chr2 - 188550835 188550918	space	95.18	3	-54.6	no	mir-3923	Primates	b		mir-3923	space	95.18	C	0	mir-3923	Primates		GGTAGAGTGAGCTCTAATCCAATATTACTAGTTTCTTTATAAGAAGAGGAAACTAATAATATTGGATTAGAGCTCACTCTACT	chr2 - 188550835 188550918	space
mir-662	GCTGTTGAGGCTGTACAGCCAGGACCTGACGGTGGGGTGGCTTCGGGCCTTCTGCAGGTCTCCCACGTTGTGGCCCAGCAGCGCAGTCACGTTGC	(((((((.((((..(((((..(((((((.(((.(((.(.(...).).))).)))))))))).....))))))))))))))))((((.....))))	chr20 + 798849 798944	space	100	0	-42	no	mir-662	Primates	a, b		mir-662	space	100	A	0	mir-662	Primates	Ref1	GCTGTTGAGGCTGTACAGCCAGGACCTGACGGTGGGGTGGCTTCGGGCCTTCTGCAGGTCTCCCACGTTGTGGCCCAGCAGCGCAGTCACGTTGC	chr20 + 798849 798944	space
mir-1225	GGTCAAGGAGGTGGGTACGGCCCAGTGGGGGGGAGAGGGACACGCCCTGGGCTCTGCCCAGGGTGCAGCCGGACTGACTGAGCCCCTGTGCCGCCCCCAGTTCCGCCACA	(((...((((.((((..((((.(((.(((((..((..((...((((((((((...))))))))))...))...))..))...)))))).))))..)))).)))))))...	chr20 - 2158500 2158610	intron	100	0	-57.4	no	mir-1225	Mammals	a, b		mir-1225	intron	100	A	0	mir-1225	Mammalia	Ref1	GTGGGTACGGCCCAGTGGGGGGGAGAGGGACACGCCCTGGGCTCTGCCCAGGGTGCAGCCGGACTGACTGAGCCCCTGTGCCGCCCCCAG	chr20 - 2158510 2158600	intron
mir-6511b-2	GGGACCTGCAGGCAGAAGCGGGGCTGACAGGGCAGAGGGTTCCGCCCCCTCACCACCCCTCCTGCCTGCAG	.....((((((((((.((.((((.(((..((((.((....)).))))..))).).))))).))))))))))	chr20 - 2175172 2175243	intron	94.37	1	-37.9	no	mir-6511	Primates	b, c		mir-6511b-2	intron	94.37	B	0	mir-6511	Primates	anotation	GGGACCTGCAGGCAGAAGCGGGGCTGACAGGGCAGAGGGTTCCGCCCCCTCACCACCCCTCCTGCCTGCAG	chr20 - 2175172 2175243	intron
mir-572	GTCGAGGCCGTGGCCCGGAAGTGATCGGGGCCGCCGCGGACGGAAGGGCGCCTCTGCTTCGTCCGCTCGGCGGTGGCCCAGCCAGGCCCGCGGGA	(.((.((((.((((.((........))((((((((((.((((((.((((......))))..)))).)).)))))))))).)))))))))))....	chr20 - 2348087 2348182	intron	100	0	-51	no	mir-572	Primates	a, b		mir-572	intron	100	A	0	mir-572	Primates	Ref1	GTCGAGGCCGTGGCCCGGAAGTGATCGGGGCCGCCGCGGACGGAAGGGCGCCTCTGCTTCGTCCGCTCGGCGGTGGCCCAGCCAGGCCCGCGGGA	chr20 - 2348087 2348182	intron
mir-940	GTGGGGTGTGGGCCCGGCCCCAGGAGCGGGGCCTGGGCAGCCCCGTGTGTTGAGGAAGGAAGGCAGGGCCCCCGCTCCCCGGGCCTGACCCCAC	(((((((..((((((((.....((((((((((((.(.(..((((.........))..))..).).))).))))))))))))))))).)))))))	chr20 + 2351971 2352065	space	100	0	-59.8	yes	mir-940	Mammals	a, b		mir-940	space	100	A	1	mir-940	Mammalia	Ref1	GTGGGGTGTGGGCCCGGCCCCAGGAGCGGGGCCTGGGCAGCCCCGTGTGTTGAGGAAGGAAGGCAGGGCCCCCGCTCCCCGGGCCTGACCCCAC	chr20 + 2351971 2352065	space
mir-6768	CCAGGCAAACAGGAAAAGCGGGGCCGCGGCTTCGGCTGCCACCCCAAAGGCCACATTCTCCTGTGCACACAG	....((..((((((.((((((((..(((((....)))))..))))....))....)).))))))))......	chr20 + 2559173 2559245	intron	93.06	0	-23.5	no		Primates	b, c		mir-6768	intron	93.06	A	0		Primates	anotation	CCAGGCAAACAGGAAAAGCGGGGCCGCGGCTTCGGCTGCCACCCCAAAGGCCACATTCTCCTGTGCACACAG	chr20 + 2559173 2559245	intron
mir-5125	CGCCTTGCAGTTTAAGGAGAGCCCATGCCTTTGGACATGCTGTTCCTTCTGCCTGGAATTTCCTTGTCCGCCTGGTGAA	((((..((.(..((((((((..(((.((....(((........)))....)).)))..)))))))).).))..))))..	chr20 - 3073722 3073801	intron	94.94	1	-25.8	no		Mammals	b		mir-5125	intron	94.94	B	0		Mammalia		CGCCTTGCAGTTTAAGGAGAGCCCATGCCTTTGGACATGCTGTTCCTTCTGCCTGGAATTTCCTTGTCCGCCTGGTGA	chr20 - 3073722 3073801	intron
mir-6126	AGCCTGTGGGGAAGAGAAGAGCACGGCAGGGTGAAGGCCCGGCGGAGACACTCTGCCCACCCCACACCCTGCCTATGGGCCACATATCT	.(((((((.............)))(((((((((..((...(((((((...)))))))...))..)))))))))...)))).........	chr20 - 3738193 3738282	space	95.51	0	-37.2	no		Primates	b		mir-6126	space	95.51	A	0		Primates		AGCCTGTGGGGAAGAGAAGAGCACGGCAGGGTGAAGGCCCGGCGGAGACACTCTGCCCACCCCACACCCTGCCTATGGGCCACATATCT	chr20 - 3738193 3738282	space
mir-548h-2	GTATTAGGTTGGTGCAAAAGTAATTGCGTTTTTTGTCATTACTTTCAATGGCAAACACCGCAATTACTTTTGCACCAACCTAATATAA	((((((((((((((((((((((((((((...(((((((((......)))))))))...))))))))))))))))))))))))))))..	chr20 - 11583399 11583487	space	96.59	2	-53.2	no	mir-548	Primates	b		mir-548h-2	space	96.59	C	0	mir-548	Primates		GTATTAGGTTGGTGCAAAAGTAATTGCGTTTTTTGTCATTACTTTCAATGGCAAACACCGCAATTACTTTTGCACCAACCTAATATAA	chr20 - 11583399 11583487	space
mir-548aq	AAAAGTAATTGTGATTTTTTGCCATTACTTTCAATGGCAAAAACTGCAATTACTTTTGCA	(((((((((((((..(((((((((((......))))))))))).)))))))))))))...	chr20 - 13008043 13008103	intron	94.83	0	-23.4	yes	mir-548	Primates	a		mir-548aq	intron	94.83	A	1	mir-548	Primates	Ref2	AAAAGTAATTGTGATTTTTTGCCATTACTTTCAATGGCAAAAACTGCAATTACTTTTGC	chr20 - 13008043 13008103	intron
mir-4718	AGCTGTACCTGAAACCAAGCATCTGTTTGTGACTTGGCTTCAGTTACTAGC	.((((((.(((((.((((((((......))).))))).))))).))).)))	chr20 + 13020542 13020593	space	98.04	0	-18.7	no		Primates	b, c		mir-4718	space	98.04	A	0		Primates	anotation	AGCTGTACCTGAAACCAAGCATCTGTTTGTGACTTGGCTTCAGTTACTAGC	chr20 + 13020542 13020593	space
mir-193b	GTGGTCTCAGAATCGGGGTTTTGAGGGCGAGATGAGTTTATGTTTTATCCAACTGGCCCTCAAAGTCCCGCTTTTGGGGTCAT	((((((((((((.(((((((((((((((.((.((.((.........)).)).)).))))))))))))))).))))))))))))	chr20 + 14704691 14704774	space	100	0	-39.3	yes	mir-193	Vertebrates	a, b		mir-193b	space	100	A	1	mir-193	Vertebrata	Ref1	GTGGTCTCAGAATCGGGGTTTTGAGGGCGAGATGAGTTTATGTTTTATCCAACTGGCCCTCAAAGTCCCGCTTTTGGGGTCAT	chr20 + 14704691 14704774	space
mir-365-1	GCCAGCTGGTTCGTTACCGCAGGGAAAATGAGGGACTTTTGGGGGCAGATGTGTTTCCATTCCACTATCATAATGCCCCTAAAAATCCTTATTGCTCTTGCAGTATTCCTC	(((....)))....(((.((((((..((((((((..(((((((((((((((((.........))).)))....))))))))))).))))))))..)))))).)))......	chr20 + 14710035 14710146	space	100	0	-37.6	yes	mir-365	Vertebrates	a, b		mir-365-1	space	100	A	4	mir-365	Vertebrata	Ref1	GCCAGCTGGTTCGTTACCGCAGGGAAAATGAGGGACTTTTGGGGGCAGATGTGTTTCCATTCCACTATCATAATGCCCCTAAAAATCCTTATTGCTCTTGCAGTATTCCTC	chr20 + 14710035 14710146	space
mir-1972-2	TATAGGCACGTGCCACCACACCTGGCTTAAATGTGTCATTTAAAAATTCAGGCCAGGCACAGTGGCTCATGCCTGTA	((((((((.(.(((((....((((((((.(((.............))).))))))))....))))).).))))))))	chr20 + 15301854 15301931	space	98.7	0	-33.4	no	mir-1972	Primates	a, b		mir-1972-2	space	98.7	A	0	mir-1972	Primates	Ref2	TATAGGCACGTGCCACCACACCTGGCTTAAATGTGTCATTTAAAAATTCAGGCCAGGCACAGTGGCTCATGCCTGTA	chr20 + 15301854 15301931	space
mir-6506	GACTGGGATGTCACTGAATATGGTGTTTGTGAGTTGATTGACATCGTATCAGAGATTCCAGACACA	..(((((((.((..(((.(((((((((.((......)).)))))))))))))).))))))).....	chr20 - 15654665 15654731	CDS	100	0	-22.3	no		Primates	b, c		mir-6506	cds	100	A	0		Primates	anotation	GACTGGGATGTCACTGAATATGGTGTTTGTGAGTTGATTGACATCGTATCAGAGATTCCAGACACA	chr20 - 15654665 15654731	cds
mir-484	CTCGCGGCCCTGCAGCCTCGTCAGGCTCAGTCCCCTCCCGATAAACCCCTAAATAGGGACTTTCCCGGGGGGTGACCCTGGCTTTTTTGGCGAAAACCCCCAGTTTAAGG	.(((((((......)))..((((((....(((.(((((((..(((.((((....))))..)))..))))))).))))))))).......)))).................	chr20 + 15685808 15685918	space	100	0	-37.3	yes	mir-484	Mammals	a, b		mir-484	space	100	A	1	mir-484	Mammalia	Ref1	CTCGCGGCCCTGCAGCCTCGTCAGGCTCAGTCCCCTCCCGATAAACCCCTAAATAGGGACTTTCCCGGGGGGTGACCCTGGCTTTTTTGGCGAAAACCCCCAGTTTAAGG	chr20 + 15685808 15685918	space
mir-3670-4	TCCAGACTGGCATAGCTGCTTTTGGAGCCTCACCTGCTGTGAGCTCACAGCTGTCCTTCTCTAGA	...(((..((.(((((((......((((.((((.....)))))))).))))))))).))).....	chr20 + 16365971 16366036	space	95.38	0	-19.3	no	mir-3670	Primates	b		mir-3670-4	space	95.38	A	0	mir-3670	Primates		TCCAGACTGGCATAGCTGCTTTTGGAGCCTCACCTGCTGTGAGCTCACAGCTGTCCTTCTCTAGA	chr20 + 16365971 16366036	space
mir-1273h	TACTTGGGTGACTAAGGCAGGATTGCTTGAGCCTGGGAGGTCGAGGCTGCATTGTTGTGATCACAGCTTACTGCAGACACGACCTCCCAGGCTCAAGCAATCCTCCTGCCCGAGTG	(((((((((.....(((.(((((((((((((((((((((((((...(((((..(((((....)))))....)))))...)))))))))))))))))))))))))))))))))))))	chr20 + 23081909 23082025	intron	93.1	1	-80.1	no	mir-1273	Primates	b		mir-1273h	intron	93.1	B	0	mir-1273	Primates		TACTTGGGTGACTAAGGCAGGATTGCTTGAGCCTGGGAGGTCGAGGCTGCATTGTTGTGATCACAGCTTACTGCAGACACGACCTCCCAGGCTCAAGCAATCCTCCTGCCCGAGTG	chr20 + 23081909 23082025	intron
mir-548w	GGTTGGTGCAAAAGTAATTGCGGTTTTTGCCTTTAAACATAATGGCAAAACTCACAACTACTTTTGCCCCAATC	((((((.(((((((((.(((.((.(((((((.(((....))).))))))).)).))).))))))))).))))))	chr20 + 24932348 24932422	intron	93.24	1	-31.1	no	mir-548	Primates	a, b		mir-548w	intron	93.24	B	0	mir-548	Primates	Ref2	GGTTGGTGCAAAAGTAATTGCGGTTTTTGCCTTTAAACATAATGGCAAAACTCACAACTACTTTTGCCCCAATC	chr20 + 24932348 24932422	intron
mir-703	AGACTGGTTAATGATAACAATGCATCATAAAACCTTCAGAAGGAAAGGAGAATGTTTTGTGGACCACTTTTTTTTTTTTTCATGTGGCAGTTTTAAATTATTAGTTTTTAAAATCAGT	..(((((((..(((.(((((((.....((((((((.((((((((((((((((.((((...))))...)))))))))))))).)).))..))))))...)))).))).))).)))))))	chr20 - 26057744 26057862	space	96.33	1	-19.7	no	mir-703	Vertebrates	b		mir-703	space	96.33	B	0	mir-703	Vertebrata		AGACTGGTTAATGATAACAATGCATCATAAAACCTTCAGAAGGAAAGGAGAATGTTTTGTGGACCACTTTTTTTTTTTTTCATGTGGCAGTTTTAAATTATTAGTTTTTAAAATCAGT	chr20 - 26057744 26057862	space
mir-4517	AGGTAAATATGATGAAACTCACAGCTGAGGAGCTTAGCAAGTAGCTAAGGCCAGAGCTTGTGTTTGGGTGGTGTGGGGG	......((((.((.((((.((.((((..((..((((((.....)))))).))..)))))).))))..)).)))).....	chr20 - 27374324 27374403	intron	97.47	0	-22.2	no		Primates	a, b		mir-4517	intron	97.47	A	0		Primates	Ref2	AGGTAAATATGATGAAACTCACAGCTGAGGAGCTTAGCAAGTAGCTAAGGCCAGAGCTTGTGTTTGGGTGGTGTGGGGG	chr20 - 27374324 27374403	intron
mir-4721	GGGCCTGGTCATGGTCAAGCCGGGTTCCATCAAGCCCCACCAGAAGGTGGAGGCCCAGGTGAGGGCTCCAGGTGACGGTGGGCAGGGCT	((.((((.((((.(((..(((((((((((((..((((((((....))))).)))...)))).)))).)).)))))).)))).)))).))	chr20 + 27500088 27500177	intron	97.75	0	-47.1	no		Primates	b		mir-4721	intron	97.75	A	0		Primates		GGGCCTGGTCATGGTCAAGCCGGGTTCCATCAAGCCCCACCAGAAGGTGGAGGCCCAGGTGAGGGCTCCAGGTGACGGTGGGCAGGGCT	chr20 + 27500088 27500177	intron
mir-762-1	GCCCGGCTCCGGGTCTCGGCCCGTACGGTCCGGCCGGCCATGCTGGCGGGGCTGGGGCCGGAGCCGAGCCC	....(((((.((.((.((((((...((((((.((((((...)))))).)))))))))))))).))))))).	chr20 + 29539898 29539969	space	100	0	-50.4	no	mir-762	Vertebrates	a, b		mir-762-1	space	100	A	0	mir-762	Vertebrata	Ref1	GCCCGGCTCCGGGTCTCGGCCCGTACGGTCCGGCCGGCCATGCTGGCGGGGCTGGGGCCGGAGCCGAGCCC	chr20 + 29539898 29539969	space
mir-1343	AAGGAGCAGGACGATGATCCTGGCGTCGGTACTGGGGAGCGGCCCCCGGGGCGGGCCTCCGCTCCGGCCCCTCCTGGGGCCCACACTCGCGCTCCGGGCCCGCTCGAC	......(((((......))))).((.(((..((((((.((((((((.((((.(((((........))))))))).)))))).......)).))))))..)))..))..	chr20 + 29762858 29762966	intron	94.44	1	-55.1	no	mir-1343	Mammals	b, c		mir-1343	intron	94.44	B	0	mir-1343	Mammalia	anotation	AAGGAGCAGGACGATGATCCTGGCGTCGGTACTGGGGAGCGGCCCCCGGGGCGGGCCTCCGCTCCGGCCCCTCCTGGGGCCCACACTCGCGCTCCGGGCCCGCTCGAC	chr20 + 29762858 29762966	intron
mir-622	AGTACTGGTCTCAGCAGATTGAGGAGAGCACCACAGTGGTCACCACACAGTCTGCCGAGGTTGGAGCT	(((.((((((((.((((((((.((.((.(((....))).)).))...)))))))).)))))))).)))	chr20 + 34122427 34122495	intron	97.06	1	-26.7	no	mir-622	Primates	a, b		mir-622	intron	97.06	B	0	mir-622	Primates	Ref1	AGTACTGGTCTCAGCAGATTGAGGAGAGCACCACAGTGGTCACCACACAGTCTGCCGAGGTTGGAGCT	chr20 + 34122427 34122495	intron
mir-3935	GGATGTGTTCCTGTCCCAGAAGGAGCTGATGGTTGTATCTATGAAGGTAAGCATTTTTGTAGATAGGAGCACCAGTCACCCTAAGCAAAGGCAGAGAATGCTTA	....(((((((((((.....(((.((((.((.((.(((((((((((((....))))))))))))).)).)).))))...))).......))))).))))))...	chr20 + 44214301 44214405	intron	98.08	2	-33.3	no		Primates	b, c		mir-3935	intron	98.08	C	0		Primates	anotation	GGATGTGTTCCTGTCCCAGAAGGAGCTGATGGTTGTATCTATGAAGGTAAGCATTTTTGTAGATAGGAGCACCAGTCACCCTAAGCAAAGGCAGAGAATGCTTA	chr20 + 44214301 44214405	intron
mir-138-2	CCCAGAGGAGGAAGCCGGCGGAGTTCTGGTATCGTTGCTGCAGCTGGTGTTGTGAATCAGGCCGACGAGCAGCGCATCCTCTTACCCGGCTATTTCACGACACCAGGGTTGCATCATACCCATCCTCTCCAGGCGAGCCTCGTGGG	((((((((.....(((((.((((....(((((.(.(((.((..(((((((((((((...(((((..(((.((......)))))...)))))..))))))))))))).)).))).))))))....)))))).)))...)))).))))	chr20 + 44876971 44877117	space	100	0	-62.8	yes	mir-138	Vertebrates	a, b		mir-138-2	space	100	A	1	mir-138	Vertebrata	Ref1	CCCAGAGGAGGAAGCCGGCGGAGTTCTGGTATCGTTGCTGCAGCTGGTGTTGTGAATCAGGCCGACGAGCAGCGCATCCTCTTACCCGGCTATTTCACGACACCAGGGTTGCATCATACCCATCCTCTCCAGGCGAGCCTCGTGGG	chr20 + 44876971 44877117	space
mir-7181	TGGGTCCTGGCTGGAGATCTCTGCTGCCCCCAGACTCAGAGGAGCCACTCCAGGACTCAGG	((((((((((.(((...(((((((((....)))...))))))..)))..))))))))))..	chr20 + 44882062 44882123	space	100	0	-26.8	no		Cercopithecidae	a, b		mir-7181	space	100	A	0		Cercopithecidae	Ref1	TGGGTCCTGGCTGGAGATCTCTGCTGCCCCCAGACTCAGAGGAGCCACTCCAGGACTCAGG	chr20 + 44882062 44882123	space
mir-6772	AGGCCTGGGTGTGGGCTGGAGCTGAGAACTGAGTCTCACCTTGCTCCTGACTCTGTGCCCATAG	.....((((((.((((.((((((((((......)))))....))))).).)))..))))))...	chr20 - 45804392 45804456	intron	93.75	1	-22.8	no		Primates	b		mir-6772	intron	93.75	B	0		Primates		AGGCCTGGGTGTGGGCTGGAGCTGAGAACTGAGTCTCACCTTGCTCCTGACTCTGTGCCCATAG	chr20 - 45804392 45804456	intron
mir-548aq	AAAAGTAATTGCTGTTTTTGCCATTACTTTCAATTGGCAAGAACCGCAATTACTTTTGC	((((((((((((.((((((((((...........)))))))))).))))))))))))..	chr20 + 50761557 50761616	space	93.1	0	-27.8	no	mir-548	Primates	a		mir-548aq	space	93.1	A	0	mir-548	Primates	Ref2	AAAAGTAATTGCTGTTTTTGCCATTACTTTCAATTGGCAAGAACCGCAATTACTTTTGC	chr20 + 50761557 50761616	space
mir-328	GGGGGCAGGAGGGGCTCAGGGAGAAAGTGCATGCAGCCCCTGGCCCTCTCTGCCCTTCC	.((((((((.(((((.(((((.......((.....)))))))))))).))))))))...	chr20 - 55356017 55356076	space	100	0	-33.1	yes	mir-328	Mammals	a, b		mir-328	space	100	A	1	mir-328	Mammalia	Ref1	GGGGGCAGGAGGGGCTCAGGGAGAAAGTGCATGCAGCCCCTGGCCCTCTCTGCCCTTCC	chr20 - 55356017 55356076	space
mir-1241	GTGAGGGGGCTGGCATGGCGAGGAGGCGCCAGAGAAGCCATAGTGTGGGGATGGGCTGCACACTCACCTCTCTGTGCCTTCCAG	.......((..(((((((.((((.(((.........)))..((((((.((.....)).))))))..)))).)))))))..))..	chr20 + 56084475 56084559	intron	100	0	-32.6	no		Cercopithecidae	a, b		mir-1241	intron	100	A	0		Cercopithecidae	Ref1	GTGAGGGGGCTGGCATGGCGAGGAGGCGCCAGAGAAGCCATAGTGTGGGGATGGGCTGCACACTCACCTCTCTGTGCCTTCCAG	chr20 + 56084475 56084559	intron
mir-1538	GGGAACAGCAGCAACAAGGCCCTCGCTTCCTGCCGCCGCTGCCCGGGTTGCTGTTCCC	((((((((((((.....(((....((........))....)))...))))))))))))	chr20 - 57871325 57871383	space	93.1	2	-25.9	no	mir-1538	Primates	c		mir-1538	space	93.1	C	0	mir-1538	Primates	anotation	GGGAACAGCAGCAACAAGGCCCTCGCTTCCTGCCGCCGCTGCCCGGGTTGCTGTTCCC	chr20 - 57871325 57871383	space
mir-140	GCCCTGTGTGTGTCTCTCTCTGTGTCCTGCCAGTGGTTTTACCCTATGGTAGGTTACGTCATGCTGTTCTACCACAGGGTAGAACCACGGACAGGATACCGGGGCACCCT	((((((...............((((((((((.(((((((((((((.(((((((.((.((...)))).))))))).))))))))))))))).)))))))))))))).....	chr20 + 58245553 58245663	intron	100	0	-55.9	yes	mir-140	Vertebrates	a, b		mir-140	intron	100	A	1	mir-140	Vertebrata	Ref1	GCCCTGTGTGTGTCTCTCTCTGTGTCCTGCCAGTGGTTTTACCCTATGGTAGGTTACGTCATGCTGTTCTACCACAGGGTAGAACCACGGACAGGATACCGGGGCACCCT	chr20 + 58245553 58245663	intron
mir-6504	GCAGTCTGGCTGTGCTGTCACACGGTCTGCACCCTGCTGCATTACAGCACAGCCATTCTCT	..((..((((((((((((((((.(((....))).)).))....))))))))))))..))..	chr20 + 69877445 69877506	intron	93.44	0	-25.7	no		Primates	b, c		mir-6504	intron	93.44	A	0		Primates	anotation	GCAGTCTGGCTGTGCTGTCACACGGTCTGCACCCTGCTGCATTACAGCACAGCCATTCTCT	chr20 + 69877445 69877506	intron
mir-6774	TGTGCACTTGGGCAGGAGGGACCCTGTGTGTCTCCCCGCAGCACCCTCATCGTGTCCCTCTCGTCCACAG	........(((((.((((((((((((((........)))))..........).)))))))).)))))...	chr20 + 74278650 74278720	intron	95.71	1	-24.3	no		Primates	b, c		mir-6774	intron	95.71	B	0		Primates	anotation	TGTGCACTTGGGCAGGAGGGACCCTGTGTGTCTCCCCGCAGCACCCTCATCGTGTCCCTCTCGTCCACAG	chr20 + 74278650 74278720	intron
mir-6720	TTGAGCGAGAGGTTGTGGCGCACGGAGTTCTTCCAGCCCTGGTAGGAGCCGCGGAAGAAGGGAAAGCGGCTCTGCAGGAACTGGTAGATCTCGCTGAGC	((.(((((((..(((((...)))))...(((.((((.((((...((((((((.............)))))))).))))..)))).)))))))))).)).	chr20 - 74874816 74874915	space	94.9	1	-38.8	no		Primates	b		mir-6720	space	94.9	B	0		Primates		TTGAGCGAGAGGTTGTGGCGCACGGAGTTCTTCCAGCCCTGGTAGGAGCCGCGGAAGAAGGGAAAGCGGCTCTGCAGGAACTGGTAGATCTCGCTGAG	chr20 - 74874816 74874915	space
mir-6508	TTCCTCTAGAAATGCATGACCTACCCTGAGTTTTGGTGGGCCGTGCATTTCTAGAACTCC	....((((((((((((((.((((((.........)))))).)))))))))))))).....	chr3 - 7299137 7299197	intron	96.67	1	-29.9	no		Primates	b, c		mir-6508	intron	96.67	B	0		Primates	anotation	TTCCTCTAGAAATGCATGACCTACCCTGAGTTTTGGTGGGCCGTGCATTTCTAGAACTCC	chr3 - 7299137 7299197	intron
mir-548i	AAAGGTCATTGCAGATTTTGCCATTACTTTTAGTGGCAAAATCGTCTATGACTTTTGC	(((((((((....(((((((((((((....)))))))))))))....)))))))))..	chr3 + 9726481 9726539	space	100	0	-26.1	yes	mir-548	Primates	a, b		mir-548i	space	100	A	1	mir-548	Primates	Ref1	AAAGGTCATTGCAGATTTTGCCATTACTTTTAGTGGCAAAATCGTCTATGACTTTTGC	chr3 + 9726481 9726539	space
mir-802	GTTCTGTTATTTGCAATCAGTAACAAAGATTCATCCTTGTGTCCATCATGCAGCAAGGAGAATCTTTGTCACTTAGTGTAATTAATAGCTGGAC	...((((((.(((((...(((.((((((((((.(((((((((.......))).)))))))))))))))).)))...))))).))))))......	chr3 - 11063023 11063117	space	100	0	-33.4	no	mir-802	Mammals	a, b		mir-802	space	100	A	0	mir-802	Mammalia	Ref1	GTTCTGTTATTTGCAATCAGTAACAAAGATTCATCCTTGTGTCCATCATGCAGCAAGGAGAATCTTTGTCACTTAGTGTAATTAATAGCTGGAC	chr3 - 11063023 11063117	space
mir-6501	GGAGTTGCCAGGGCTGCCTTTGGTGACAGCAGCAGTAGAGTTGCCAGAGCAGCCTGCGGTAACAGTA	...((((((.(((((((.(((((((((.((....))...))))))))))))))))..))))))....	chr3 - 13210687 13210754	CDS	100	0	-32.6	yes		Mammals	b, c		mir-6501	CDS	100	A	1		Mammalia	anotation	GGAGTTGCCAGGGCTGCCTTTGGTGACAGCAGCAGTAGAGTTGCCAGAGCAGCCTGCGGTAACAGTA	chr3 - 13210687 13210754	cds
mir-9922	GCCCCTTTCTACCCCAGTGCCTGAGTTGCCAGGGCCCCCTGCGACAGCAGTGCCTGAGTTGCCAGGGCCCTCTGTGACACCAGTGCCACAGTTGTCGCAGGAATTGCCAGGGCTTCCAGCACCATCCATGGGGTTGGAGCCA	......((((((((((((((.((.(..(((..(((..(((((((((((.(((((((.((..(((((....)))).)..))))).).))).)))))))))))....)))..)))..)))))))......))))).)))))...	chr3 - 13210789 13210931	CDS	97.18	0	-61.2	no		Primates	b		mir-9922	CDS	97.18	A	0		Primates		GCCCCTTTCTACCCCAGTGCCTGAGTTGCCAGGGCCCCCTGCGACAGCAGTGCCTGAGTTGCCAGGGCCCTCTGTGACACCAGTGCCACAGTTGTCGCAGGAATTGCCAGGGCTTCCAGCACCATCCATGGGGTTGGAGCC	chr3 - 13210789 13210931	cds
mir-7185	TCAGGATCAGGATCTGCAGAGCAATTAGTATAGTGCTCTGCAGATCCTGGTCCTAATA	..(((((((((((((((((((((..........)))))))))))))))))))))....	chr3 - 14021595 14021653	intron	100	0	-40	no		Cercopithecidae	a, b		mir-7185	intron	100	A	0		Cercopithecidae	Ref1	TCAGGATCAGGATCTGCAGAGCAATTAGTATAGTGCTCTGCAGATCCTGGTCCTAATA	chr3 - 14021595 14021653	intron
mir-4327	GGCCTGGGTAGACTTGCATGGGGGACTGGGGAAGACACCATGAACAGGATAGTCTAGGGAGTTCCCATCAAGCCCTTTACTCAGTAG	...(((((((((((((.((((((.(((.....((((.((.......))...))))....)))))))))))))...)))))))))...	chr3 + 16538427 16538514	intron	94.12	1	-27.1	no		Primates	b		mir-4327	intron	94.12	B	0		Primates		GGCCTGGGTAGACTTGCATGGGGGACTGGGGAAGACACCATGAACAGGATAGTCTAGGGAGTTCCCATCAAGCCCTTTACTCAGTAG	chr3 + 16538427 16538514	intron
mir-4759	CATTTAGGACTAGATGTTGGAATTAGACAGAAAAAAAATAAAGTAGACACAAAAAATTGTGTCTGATTCCAACATCTAGTCCTAAATG	(((((((((((((((((((((((((((((.((........................)).)))))))))))))))))))))))))))))	chr3 - 20027247 20027335	space	97.59	0	-45.9	no		Primates	b		mir-4759	space	97.59	A	0		Primates		CATTTAGGACTAGATGTTGGAATTAGACAGAAAAAAAATAAAGTAGACACAAAAAATTGTGTCTGATTCCAACATCTAGTCCTAAATG	chr3 - 20027247 20027335	space
mir-155	CTGTTAATGCTAATCGTGATAGGGGTTTTTACCTCCAACTGACTCCTACATGTTAGCATTAACAG	(((((((((((((.((((.((((((((.............)))))))))))))))))))))))))	chr3 - 21414572 21414637	space	100	0	-30	yes	mir-155	Vertebrates	a, b		mir-155	space	100	A	1	mir-155	Vertebrata	Ref1	CTGTTAATGCTAATCGTGATAGGGGTTTTTACCTCCAACTGACTCCTACATGTTAGCATTAACAG	chr3 - 21414572 21414637	space
mir-703	TGAAACTTTCAGAAGGAAAGGAGAATGTTTTGTGGACCACTTTGGTTTTCTTTTTGGAGTGTGGCAGTTTTA	(((((((.(((.(..(((((((((((.....(((...)))....)))))))))))....).))).)))))))	chr3 - 23685295 23685367	space	96.88	1	-16.7	no	mir-703	Vertebrates	b		mir-703	space	96.88	B	0	mir-703	Vertebrata		TGAAACTTTCAGAAGGAAAGGAGAATGTTTTGTGGACCACTTTGGTTTTCTTTTTGGAGTGTGGCAGTTTTA	chr3 - 23685295 23685367	space
mir-6130	CAATGAATGTGGAAATGCAGGCATCCCTTCTACATACTGATTTAATTTTCCTTGGATTTGTATCCAGTACTGAGGGAGTGGATTGTATGGTAGTTCTATTTTTAAATTT	...((((.((((((.(((..(((((((((((.(((((((((..(((((.....)))))...)).))))).)).))))).))).)))...))).)))))).)))).....	chr3 - 24019631 24019740	space	100	0	-23.9	no	mir-6130	Primates	a, b		mir-6130	space	100	A	0	mir-6130	Primates	Ref1	CAATGAATGTGGAAATGCAGGCATCCCTTCTACATACTGATTTAATTTTCCTTGGATTTGTATCCAGTACTGAGGGAGTGGATTGTATGGTAGTTCTATTTTTAAATTT	chr3 - 24019631 24019740	space
mir-3588	CTGCTGGTTCCCCTCCGCCTAGGTCCCAAGAGCCTGACTTGTGATGTTACTAAAATACCTCACAAGTTAGGGTCTCAGGGACTAGGAAAAGTCTGGTTTGATGCAG	((((.....((.((...(((((.((((.(((.((((((((((((.((.........)).)))))))))))).)))..)))))))))...))...))......))))	chr3 + 30675078 30675184	space	98.11	0	-43.1	no	mir-10	Mammals	b, c		mir-3588	space	98.11	A	0	mir-10	Mammalia	anotation	CTGCTGGTTCCCCTCCGCCTAGGTCCCAAGAGCCTGACTTGTGATGTTACTAAAATACCTCACAAGTTAGGGTCTCAGGGACTAGGAAAAGTCTGGTTTGATGCAG	chr3 + 30675078 30675184	space
mir-125b-2	ACCAGACTTTTCCTAGTCCCTGAGACCCTAACTTGTGAGGTATTTTAGTAACATCACAAGTCAGGCTCTTGGGACCTAGGCGGAGGGGA	.((...((((.(((((((((.((((.(((.((((((((.((.........)).)))))))).))).)))))))).))))).)))).)).	chr3 - 30675086 30675175	space	100	0	-35.8	yes	mir-10	Vertebrates	a, b		mir-125b-2	space	100	A	1	mir-10	Vertebrata	Ref1	ACCAGACTTTTCCTAGTCCCTGAGACCCTAACTTGTGAGGTATTTTAGTAACATCACAAGTCAGGCTCTTGGGACCTAGGCGGAGGGGA	chr3 - 30675086 30675175	space
let-7c	GAAGCTGTGTGCATCCGGGTTGAGGTAGTAGGTTGTATGGTTTAGAGTTACACCCTGGGAGTTAACTGTACAACCTTCTAGCTTTCCTTGGAGCACACTTGAGCCATC	...(((((((((.((((((..(((.(((.(((((((((((((..((.(..((...))..).))))))))))))))).))).)))..))))))))))))...)))....	chr3 - 30725019 30725127	space	100	0	-43	yes	let-7	Vertebrates	a, b		let-7c	space	100	A	1	let-7	Vertebrata	Ref1	GAAGCTGTGTGCATCCGGGTTGAGGTAGTAGGTTGTATGGTTTAGAGTTACACCCTGGGAGTTAACTGTACAACCTTCTAGCTTTCCTTGGAGCACACTTGAGCCATC	chr3 - 30725019 30725127	space
mir-99a	GTTGCCCATTGGCATAAACCCGTAGATCCGATCTTGTGGTGAAGTGGACCGCACAAGCTCGCTTCTATGGGTCTGTGTCAGTGTGGTAAT	((((((((((((((((.(((((((((..(((.((((((.((........)))))))).)))..))))))))).)))))))))).))))))	chr3 - 30725764 30725854	space	100	0	-46.6	yes	mir-10	Vertebrates	a, b		mir-99a	space	100	A	1	mir-10	Vertebrata	Ref1	GTTGCCCATTGGCATAAACCCGTAGATCCGATCTTGTGGTGAAGTGGACCGCACAAGCTCGCTTCTATGGGTCTGTGTCAGTGTGGTAAT	chr3 - 30725764 30725854	space
mir-4477a	GTCTCCTCCCATGAATCACAAATGTCCTTAATGGCATTTAAGGATTGCTATTAAGGACATTTGTGATTCTTGGGAGGAGGT	.((((((((((.((((((((((((((((((((((((.........)))))))))))))))))))))))).)))))))))).	chr3 - 33205996 33206077	space	93.83	0	-57.6	no	mir-4477	Primates	a, b		mir-4477a	space	93.83	A	0	mir-4477	Primates	Ref2	GTCTCCTCCCATGAATCACAAATGTCCTTAATGGCATTTAAGGATTGCTATTAAGGACATTTGTGATTCTTGGGAGGAGGT	chr3 - 33205996 33206077	space
mir-4477b	ACCTCCTCCCAAGAATCACAAATGTCCTTAATAGCAATCCTTAAATGCCATTAAGGACATTTGTGATTCATGGGAGGAGAC	..(((((((((.((((((((((((((((((((.(((.........))).)))))))))))))))))))).)))))))))..	chr3 + 33205996 33206077	space	93.83	1	-51.9	no	mir-4477	Primates	b		mir-4477b	space	93.83	B	0	mir-4477	Primates		ACCTCCTCCCAAGAATCACAAATGTCCTTAATAGCAATCCTTAAATGCCATTAAGGACATTTGTGATTCATGGGAGGAGAC	chr3 + 33205996 33206077	space
mir-5699	TCTGTACCCCTGCCCCAACAAGGAAGGACAAGAGGTGTGAGCCACACTCTCGGCCTCCTGTCTTTCCTTGTTGGATCAGGGATGTAG	.(((((.(((((..((((((((((((((((.((((((.(((.....))).).))))).))))))))))))))))..))))).)))))	chr3 + 33265916 33266003	space	94.03	0	-47.8	no		Primates	b		mir-5699	space	94.03	A	0		Primates		TGCCCCAACAAGGAAGGACAAGAGGTGTGAGCCACACTCTCGGCCTCCTGTCTTTCCTTGTTGGATC	chr3 + 33265926 33265993	space
mir-339	CGGGGCGGCCGCTCTCCCTGTCCTCCAGGAGCTCACGTGTGCCTGCCTGTGAGCGCCTCGACGACAGAGCCGGCGCCCGCCCCAGTGTCTGCGC	.(((((((.((((..(.(((((.((.(((.(((((((.((....)).))))))).))).)).))))).)..)))).)))))))...........	chr3 - 35903201 35903295	intron	100	0	-49.6	yes	mir-339	Mammals	a, b		mir-339	intron	100	A	1	mir-339	Mammalia	Ref1	CGGGGCGGCCGCTCTCCCTGTCCTCCAGGAGCTCACGTGTGCCTGCCTGTGAGCGCCTCGACGACAGAGCCGGCGCCCGCCCCAGTGTCTGCGC	chr3 - 35903201 35903295	intron
mir-589	TCCAGCCTGTGCCCAGCAGCCCCTGAGAACCACGTCTGCTCTGAGCTGGGTACTGCCTGTTCAGAACAGACGCTGCTTCCCAGACGCTGCCAGCTGGCC	.(((((.((......(((((..(((.(((.((((((((.(((((((.((......)).))))))).)))))).)).))).)))..))))))))))))..	chr3 + 40606416 40606515	intron	100	0	-44.8	no	mir-589	Mammals	a, b		mir-589	intron	100	A	0	mir-589	Mammalia	Ref1	TCCAGCCTGTGCCCAGCAGCCCCTGAGAACCACGTCTGCTCTGAGCTGGGTACTGCCTGTTCAGAACAGACGCTGCTTCCCAGACGCTGCCAGCTGGCC	chr3 + 40606416 40606515	intron
mir-3609	GTAACATTAACTTTTATTCTCGTTTTCCTTTTCTCTACCTTGTAGAGAAGCAAAGTGATGAGTAATACTGGCTGGAGCCC	..............((((((((((.....(((((((((...)))))))))......)))))).))))..(((....))).	chr3 + 43126325 43126405	intron	97.5	0	-18.2	yes		Primates	b, c		mir-3609	intron	97.5	A	1		Primates	anotation	GTAACATTAACTTTTATTCTCGTTTTCCTTTTCTCTACCTTGTAGAGAAGCAAAGTGATGAGTAATACTGGCTGGAGCCC	chr3 + 43126325 43126405	intron
mir-25	GCCAGTGTTGAGAGGCGGAGACTTGGGCAATTGCTGGACGCTGCCCTGGGCATTGCACTTGTCTCGGTCTGACAGTGCCGGCCC	(((.((((((..((((.(((((..(.(((((..((((........))))..))))).)..))))).))))..)))))).)))..	chr3 - 44449530 44449614	intron	100	0	-33.4	yes	mir-25	Vertebrates	a, b		mir-25	intron	100	A	1	mir-25	Vertebrata	Ref1	GCCAGTGTTGAGAGGCGGAGACTTGGGCAATTGCTGGACGCTGCCCTGGGCATTGCACTTGTCTCGGTCTGACAGTGCCGGCCC	chr3 - 44449530 44449614	intron
mir-93	CTGGGGGCTCCAAAGTGCTGTTCGTGCAGGTAGTGTGATTAACCGACCTACTGCTGAGCTAGCACTTCCCGAGCCCCCAG	((((((((((..((((((((((((.((((.(((.((.........)))))))))))))).)))))))...))))))))))	chr3 - 44449736 44449816	intron	100	0	-44.5	yes	mir-17	Vertebrates	a, b		mir-93	intron	100	A	1	mir-17	Vertebrata	Ref1	CTGGGGGCTCCAAAGTGCTGTTCGTGCAGGTAGTGTGATTAACCGACCTACTGCTGAGCTAGCACTTCCCGAGCCCCCAG	chr3 - 44449736 44449816	intron
mir-106b	CCTGCTGGGGCTAAAGTGCTGACAGTGCAGATAGTGGTCCTCTCCGTGCTACCGCACTGTGGGTACTTGCTGCTCCAGCAGGGC	(((((((((((..(((((((.(((((((.(.((((((......))..))))).))))))).)))))))...)))))))))))..	chr3 - 44449957 44450041	intron	100	0	-50.4	yes	mir-17	Vertebrates	a, b		mir-106b	intron	100	A	1	mir-17	Vertebrata	Ref1	CCTGCTGGGGCTAAAGTGCTGACAGTGCAGATAGTGGTCCTCTCCGTGCTACCGCACTGTGGGTACTTGCTGCTCCAGCAGGGC	chr3 - 44449957 44450041	intron
mir-4658	GCTGCCCTTCACTCAGAGCATCTACACCCACTACCGGTGAGTGTGGATCCCGGAGGAACTGTGGC	(((((..(((.(((.(.(.((((((((.((((...)))).)))))))).)).))))))..)))))	chr3 - 44527087 44527152	overlap	95.38	1	-24.2	no		Primates	b, c		mir-4658	overlap	95.38	B	0		Primates	anotation	GCTGCCCTTCACTCAGAGCATCTACACCCACTACCGGTGAGTGTGGATCCCGGAGGAACTGTGGC	chr3 - 44527087 44527152	overlap
mir-6875	GAGTCTGGGGGACCCAGGACAGGAGAAGGCCTATGGTGATTTGCATTCTTCCCTGCTCTGGCTTCATCCTCAG	....(((((((..(((((.((((.(((((...(((........)))))))))))).))))).....)))))))	chr3 + 45166987 45167060	intron	95.83	1	-25.5	no		Primates	b		mir-6875	intron	95.83	B	0		Primates		GAGTCTGGGGGACCCAGGACAGGAGAAGGCCTATGGTGATTTGCATTCTTCCCTGCTCTGGCTTCATCCTCAG	chr3 + 45166987 45167060	intron
mir-4653	TTGTCCAATTCTCTGAGCAAGGCTTAACGCCAAGGGGTTAAGGGTTTGCTTTGGAGTTAAGGGTTGCTTGGAGAATTGGAGAA	.(.(((((((((((((((((..((((((.((((((.(.........).)))))).))))))..))))))))))))))))).).	chr3 + 45470089 45470172	intron	96.39	0	-41.6	no		Primates	b, c		mir-4653	intron	96.39	A	0		Primates	anotation	TTGTCCAATTCTCTGAGCAAGGCTTAACGCCAAGGGGTTAAGGGTTTGCTTTGGAGTTAAGGGTTGCTTGGAGAATTGGAGAA	chr3 + 45470089 45470172	intron
mir-4651	CGGCGACAGCGGGGTGAGTGAGGTCGGGCCCCGGGACTCGGGGTTTGCCGGGCGCCTCAGTTCGCCGCGGCCG	((((..(.(((((.((((.(.(.((((((((((.....))))))...)))).).))))).))))).)..))))	chr3 - 47446661 47446734	intron	93.15	1	-39.2	no		Primates	b, c		mir-4651	intron	93.15	B	0		Primates	anotation	CGGCGACAGCGGGGTGAGTGAGGTCGGGCCCCGGGACTCGGGGTTTGCCGGGCGCCTCAGTTCGCCGCGGCCG	chr3 - 47446661 47446734	intron
mir-590	TAGCCAGTCAGAAATGAGCTTATTCATAAAAGTGCAGTATGGTGGAGTCAGTCTGTAATTTTATGTATAAGCTGGTCTCTAACTGAAACGTGCAGCA	....((((.(((.((.(((((((.(((((((.(((((..(((.....)))..))))).))))))).))))))).)).))).))))............	chr3 + 48793641 48793738	intron	100	0	-31.5	yes	mir-590	Mammals	a, b		mir-590	intron	100	A	1	mir-590	Mammalia	Ref1	TAGCCAGTCAGAAATGAGCTTATTCATAAAAGTGCAGTATGGTGGAGTCAGTCTGTAATTTTATGTATAAGCTGGTCTCTAACTGAAACGTGCAGCA	chr3 + 48793641 48793738	intron
mir-10525	AAGGTGGATGATGGGACTTGGGAGAAAGTACTCCCAGGTGACTATGATGTGCACCCGAT	..((((.((.((((.(((((((((......)))))))))..))))...)).))))....	chr3 + 49224321 49224380	intron	94.92	1	-23.8	no		Primates	b, c		mir-10525	intron	94.92	B	0		Primates	anotation	AAGGTGGATGATGGGACTTGGGAGAAAGTACTCCCAGGTGACTATGATGTGCACCCGAT	chr3 + 49224321 49224380	intron
mir-3914-1	TGGACTTCAGATTTAACTTTTCATTTTCTGATTCCTTCTAATGAGTATGCTTAACTTGGTAGAAGGAACCAGAAAATGGAAGTTGAGTAGGAACTCTAC	((((.(((..((((((((((.(((((((((.(((((((((.(((((.......))))).))))))))).)))))))))))))))))))..))).)))).	chr3 - 53760163 53760262	space	96.97	1	-40.8	no	mir-3914	Primates	b, c		mir-3914-1	space	96.97	B	0	mir-3914	Primates	anotation	TGGACTTCAGATTTAACTTTTCATTTTCTGATTCCTTCTAATGAGTATGCTTAACTTGGTAGAAGGAACCAGAAAATGGAAGTTGAGTAGGAACTCTA	chr3 - 53760163 53760262	space
mir-3914-2	GAGTTCCTACTCAACTTCCATTTTCTGGTTCCTTCTACCAAGTTAAGCATACTCATTAGAAGGAATCAGAAAATGAAAAGTTAAATCTGAAGTCC	((((....))))(((((.(((((((((((((((((((...(((.......)))...)))))))))))))))))))..))))).............	chr3 + 53760166 53760261	intron	96.84	2	-33.7	no	mir-3914	Primates	b		mir-3914-2	intron	96.84	C	0	mir-3914	Primates		GAGTTCCTACTCAACTTCCATTTTCTGGTTCCTTCTACCAAGTTAAGCATACTCATTAGAAGGAATCAGAAAATGAAAAGTTAAATCTGAAGTC	chr3 + 53760166 53760261	intron
mir-548i-2	AGGTTGGTGCAAAAGTAATTGCAGTTTTTGCCATTAAAAGTAATGCAAAAACTGCAATTACTTTTGCACCAAGCT	((.((((((((((((((((((((((((((((.((((....)))))))))))))))))))))))))))))))).))	chr3 + 66574057 66574132	space	93.15	1	-47.6	no	mir-548	Primates	b		mir-548i-2	space	93.15	B	0	mir-548	Primates		AGGTTGGTGCAAAAGTAATTGCAGTTTTTGCCATTAAAAGTAATGCAAAAACTGCAATTACTTTTGCACCAAGCT	chr3 + 66574057 66574132	space
mir-4657	AATGTGGAAGTGGTCTGAGGCATATAGAGTATATGCCAAGAACACTACCATATATG	.((((((.((((.(((..((((((((...)))))))).))).)))).))))))...	chr3 + 75622180 75622236	3UTR	100	0	-23.7	no	mir-4657	Mammals	a, b		mir-4657	3utr	100	A	0	mir-4657	Mammalia	Ref2	AATGTGGAAGTGGTCTGAGGCATATAGAGTATATGCCAAGAACACTACCATATATG	chr3 + 75622180 75622236	3UTR
mir-4649	TCTGGGCGGGGGGCGGGCTCTCAGAGGGGTTGGCAGTACTGCTCTGAGGCCTGCCTCTCCCCAG	.(((((.(((((((((((.(((((((.(((.......))).)))))))))))))))))))))))	chr3 - 76407322 76407386	intron	95.31	0	-47.8	no		Primates	b, c		mir-4649	intron	95.31	A	0		Primates	anotation	TCTGGGCGGGGGGCGGGCTCTCAGAGGGGTTGGCAGTACTGCTCTGAGGCCTGCCTCTCCCCAG	chr3 - 76407322 76407386	intron
mir-6838	CAGGGAAGCAGCAGTGGCATGACTCCTAGGTCATGGAAGTCCTGCTTCTGTTGCAG	.......(((((((.((((.((((((........)).)))).)))).)))))))..	chr3 + 76450368 76450424	intron	96.43	0	-25.2	no		Primates	b		mir-6838	intron	96.43	A	0		Primates		CAGGGAAGCAGCAGTGGCATGACTCCTAGGTCATGGAAGTCCTGCTTCTGTTGCAG	chr3 + 76450368 76450424	intron
mir-11996	ATCTGAGAGTACTTTGTCAAGGTTGCGTTCCTTGGCAGAGAGCTCTCAGT	..((((((((.(((((((((((.......))))))))))).)))))))).	chr3 - 78833531 78833581	intron	94	1	-28.9	no		Mammals	b, c		mir-11996	intron	94	B	0		Mammalia	anotation	ATCTGAGAGTACTTTGTCAAGGTTGCGTTCCTTGGCAGAGAGCTCTCAGT	chr3 - 78833531 78833581	intron
mir-1200	TGCTACTTCTCCTGTGCCAGTCTGAGCCTCAATCACTTGCCAGAGAGATTGGTTCAGGAATTTGTCAGGGATAGCC	.((((..((.((((......((((((((..((((.(((....))).)))))))))))).......)))))))))).	chr3 + 83630150 83630226	intron	97.37	2	-23.9	no	mir-1200	Primates	b		mir-1200	intron	97.37	C	0	mir-1200	Primates		TGCTACTTCTCCTGTGCCAGTCTGAGCCTCAATCACTTGCCAGAGAGATTGGTTCAGGAATTTGTCAGGGATAGCC	chr3 + 83630150 83630226	intron
mir-550b-1	AGGGACTTGCTGGAGATGTGCCTGAGGGAGTAAGACACTATCTTACAACAACAGGGCTCTTACCCCCTCAGGCACTGCACCAGCCAGCAAAGCATCA	.....((.(((((....(((((((((((.((((((..((..............))..)))))).)))))))))))....))))).))..........	chr3 + 87846461 87846558	intron	96.91	0	-41.3	no	mir-550	Primates	b, c		mir-550b-1	intron	96.91	A	0	mir-550	Primates	anotation	AGGGACTTGCTGGAGATGTGCCTGAGGGAGTAAGACACTATCTTACAACAACAGGGCTCTTACCCCCTCAGGCACTGCACCAGCCAGCAAAGCATCA	chr3 + 87846461 87846558	intron
mir-550	TGATGCTTTGCTGGCTGGTGCAGTGCCTGAGGGGGTAAGAGCCCTGTTGTTGTAAGATAGTGTCTTACTCCCTCAGGCACATCTCCAGCAAGT	.........(((.(((((.(..((((((((((((((((((.(.(((((.......))))).)))))))))))))))))))..).))))).)))	chr3 - 87846465 87846558	space	100	0	-50.3	no	mir-550	Primates	a, b		mir-550	space	100	A	0	mir-550	Primates	Ref1	TGATGCTTTGCTGGCTGGTGCAGTGCCTGAGGGGGTAAGAGCCCTGTTGTTGTAAGATAGTGTCTTACTCCCTCAGGCACATCTCCAGCAAGT	chr3 - 87846465 87846558	space
mir-550a-1	TGATGCTTTGCTGGCTGGTGCAGTGCCTGAGGGAGTAAGAGCCCTGTTGTTGTAAGATAGTGTCCTACTCCCTCAGGCACATCTCCAGCAAGTCCCT	.........(((.(((((.(..(((((((((((((((.(.((.(((((.......))))).)).))))))))))))))))..).))))).)))....	chr3 - 90373902 90373999	intron	96.91	0	-47.3	yes	mir-550	Primates	a, b		mir-550a-1	intron	96.91	A	1	mir-550	Primates	Ref1	TGATGCTTTGCTGGCTGGTGCAGTGCCTGAGGGAGTAAGAGCCCTGTTGTTGTAAGATAGTGTCCTACTCCCTCAGGCACATCTCCAGCAAGTCCCT	chr3 - 90373902 90373999	intron
mir-550b-1	AGGGACTTGCTGGAGATGTGCCTGAGGGAGTAGGACACTATCTTACAACAACAGGGCTCTTACTCCCTCAGGCACTGCACCAGCCAGCAAAGCATCA	.....((.(((((....((((((((((((((((((..((..............))..))))))))))))))))))....))))).))..........	chr3 + 90373902 90373999	space	96.91	0	-45.8	no	mir-550	Primates	b		mir-550b-1	space	96.91	A	0	mir-550	Primates		AGGGACTTGCTGGAGATGTGCCTGAGGGAGTAGGACACTATCTTACAACAACAGGGCTCTTACTCCCTCAGGCACTGCACCAGCCAGCAAAGCATCA	chr3 + 90373902 90373999	space
mir-7184	AGGGGCCAGGCCAAATGCTCAGTGAGTGTCTGCTCTGCACCTGAGCCTTCTGCTGGACCCGTGA	..(((((((.(..((.((((((...((((.......)))))))))).))..))))).)))....	chr3 + 92685037 92685101	intron	100	0	-22.7	yes		Cercopithecidae	a, b		mir-7184	intron	100	A	3		Cercopithecidae	Ref1	AGGGGCCAGGCCAAATGCTCAGTGAGTGTCTGCTCTGCACCTGAGCCTTCTGCTGGACCCGTGA	chr3 + 92685037 92685101	intron
mir-196b	AACTGGTCGGTGATTTAGGTAGTTTCCTGTTGTTGGGATCCACCTTTCTCTCGACAGCACGACACTGCCTTCATTACTTCAGTTG	((((((..((((((..(((((((.((.(((((((((((..........))))))))))).)).)))))))..)))))))))))).	chr3 + 93558670 93558755	intron	100	0	-35.5	yes	mir-196	Vertebrates	a, b		mir-196b	intron	100	A	1	mir-196	Vertebrata	Ref1 Ref2	AACTGGTCGGTGATTTAGGTAGTTTCCTGTTGTTGGGATCCACCTTTCTCTCGACAGCACGACACTGCCTTCATTACTTCAGTTG	chr3 + 93558670 93558755	intron
mir-148a	GGTCTTTTGAGGCAAAGTTCTGAGACACTCCGACTCTGAGTATGATAGAAGTCAGTGCACTACAGAACTTTGTCTCTAGAGGCT	(((((((.((((((((((((((((.((((..(((((((.......))).))))))))..)).)))))))))))))).)))))))	chr3 + 94823492 94823576	space	100	0	-36.3	yes	mir-148	Vertebrates	a, b		mir-148a	space	100	A	1	mir-148	Vertebrata	Ref1	GGTCTTTTGAGGCAAAGTTCTGAGACACTCCGACTCTGAGTATGATAGAAGTCAGTGCACTACAGAACTTTGTCTCTAGAGGCT	chr3 + 94823492 94823576	space
mir-148d	AAAGTTCTGTAGTGCACTGACTTCTATCATACTCAGAGTCGGAGTGTCTCAGAACTTTGCC	(((((((((.(((((.(((((((............))))))).))).)))))))))))...	chr3 - 94823502 94823563	space	98.36	0	-19.5	no	mir-148	Vertebrates	b, c		mir-148d	space	98.36	A	0	mir-148	Vertebrata	anotation	AAAGTTCTGTAGTGCACTGACTTCTATCATACTCAGAGTCGGAGTGTCTCAGAACTTTGCC	chr3 - 94823502 94823563	space
mir-3146	ACAGAGATACACGTTTTCTTTGCTAAGTCCTTTCTTTCTATCCTAGTATAACTTGAAGAATTCAAATAGTCATGCTAGAACAGAAAGAATGGGAGTTGGCAAGGGAAGAAGG	.............(((((((((((((.((((((((((((...(((((((.(((((((...))))...))).)))))))...)))))))).)))).)))))))))))))....	chr3 + 101016404 101016516	intron	99.11	0	-39.8	yes	mir-3146	Primates	a, b		mir-3146	intron	99.11	A	1	mir-3146	Primates	Ref1	ACAGAGATACACGTTTTCTTTGCTAAGTCCTTTCTTTCTATCCTAGTATAACTTGAAGAATTCAAATAGTCATGCTAGAACAGAAAGAATGGGAGTTGGCAAGGGAAGAAGG	chr3 + 101016404 101016516	intron
mir-1302-6	AATGAATAATTTGGTAATATATGTATGGCCCACACAATATTTAGGACAGCAATATTTGGGACATATTTATGCTAAAAAAGTATTTGTTGA	((((((((.(((..((.((((.(((((.((((...((((((.........)))))))))).))))).)))).))..))).))))))))..	chr3 + 102628081 102628171	space	95.56	1	-15.6	no	mir-1302	Mammals	b		mir-1302-6	space	95.56	B	0	mir-1302	Mammalia		AATGAATAATTTGGTAATATATGTATGGCCCACACAATATTTAGGACAGCAATATTTGGGACATATTTATGCTAAAAAAGTATTTGTTGA	chr3 + 102628081 102628171	space
mir-1282	CCTTCTTCTCGTTTGCCTTTTTCTGCTTCTGCTGCATGATCTCCGAGTCCCTGGGGGTAGAGATGATGGGGCACTAGGAGGTACCAGAGGGCAAAAAGAAC	.....((((..((((((((((..((((((((((.(((.(((((..(.(((...))).).))))).))).)))....)))))))..)))))))))).)))).	chr3 + 115668048 115668149	intron	98.02	0	-38.1	no	mir-1282	Mammals	b		mir-1282	intron	98.02	A	0	mir-1282	Mammalia		CCTTCTTCTCGTTTGCCTTTTTCTGCTTCTGCTGCATGATCTCCGAGTCCCTGGGGGTAGAGATGATGGGGCACTAGGAGGTACCAGAGGGCAAAAAGAAC	chr3 + 115668048 115668149	intron
mir-591	TCTTATCAATGAGGCAGACCATGGGTTCTCATTGTGATAGTGTAGAATGTTGGTTAACTGTGGACTCCCTGGCTGTGTCTCAAATCTACTGATTC	.........(((((((.((((.((((((.(((((.((((........))))...))).)).)))).)).))).).)))))))((((....)))).	chr3 + 115746857 115746952	intron	97.89	0	-22.3	no	mir-591	Primates	b		mir-591	intron	97.89	A	0	mir-591	Primates		TCTTATCAATGAGGCAGACCATGGGTTCTCATTGTGATAGTGTAGAATGTTGGTTAACTGTGGACTCCCTGGCTGTGTCTCAAATCTACTGATTC	chr3 + 115746857 115746952	intron
mir-489	GTGGCAGCTTGGTGGTCGTATGTGTGGCGCCATTTACTTGAACCTTTAGGAGTGACATCACATATACGGCAGCTAAACTGTTAC	(((((((.(((((.(((((((((((((.(.((((..(((((....))))))))).).))))))))))))).))))).)))))))	chr3 + 118484198 118484282	intron	100	0	-35.5	no	mir-489	Vertebrates	a, b		mir-489	intron	100	A	0	mir-489	Vertebrata	Ref1	GTGGCAGCTTGGTGGTCGTATGTGTGGCGCCATTTACTTGAACCTTTAGGAGTGACATCACATATACGGCAGCTAAACTGTTAC	chr3 + 118484198 118484282	intron
mir-653	TTCATTCCTTCAGTGTTGAAACAATCTCTACTGAACCAGCTTCAAACAAATTCACTGGAGTTTGTTTCAATATTGCAAGAATGATAAGATGGAAGC	.((((((...((((((((((((((.(((((.((((...............)))).))))).))))))))))))))...))))))............	chr3 + 118485290 118485386	intron	100	0	-29.6	no	mir-653	Mammals	a, b		mir-653	intron	100	A	0	mir-653	Mammalia	Ref1	TTCATTCCTTCAGTGTTGAAACAATCTCTACTGAACCAGCTTCAAACAAATTCACTGGAGTTTGTTTCAATATTGCAAGAATGATAAGATGGAAGC	chr3 + 118485290 118485386	intron
mir-1285-1	TGTAGAGATAGGGTCTCACTTTGTTGCCCAGGCTGGTCTCAAACTCCTGGTCTGGGCAACAAATTGAGACCCTATCTCTACAGG	((((((((((((((((((.(((((((((((((((((..........))))))))))))))))).))))))))))))))))))..	chr3 + 119787277 119787361	intron	95.24	1	-61	no	mir-1285	Mammals	a, b		mir-1285-1	intron	95.24	B	0	mir-1285	Mammalia	Ref2	TGTAGAGATAGGGTCTCACTTTGTTGCCCAGGCTGGTCTCAAACTCCTGGTCTGGGCAACAAATTGAGACCCTATCTCTACAGG	chr3 + 119787277 119787361	intron
mir-548ba	AAAAGTAACTGTGGTTTTTGCTATTAAAAGTAATGGCAAAAACTGCAATTACTTTT	((((((((.(((((((((((((((((....))))))))))))))))).))))))))	chr3 + 129807518 129807574	intron	94.64	2	-25.6	no	mir-548	Primates	b		mir-548ba	intron	94.64	C	0	mir-548	Primates		AAAAGTAACTGTGGTTTTTGCTATTAAAAGTAATGGCAAAAACTGCAATTACTTT	chr3 + 129807518 129807574	intron
mir-622	AGTACTGGTCTCAGCAGATTGAGGAGAGCACCAGAGTGGTCACCACACAGTCTGCCAAGGTTGGAGCT	(((.(((((((..((((((((.((.((.(((....))).)).))...))))))))..))))))).)))	chr3 + 130552364 130552432	intron	94.12	2	-23.3	no	mir-622	Primates	b		mir-622	intron	94.12	C	0	mir-622	Primates		AGTACTGGTCTCAGCAGATTGAGGAGAGCACCAGAGTGGTCACCACACAGTCTGCCAAGGTTGGAGCT	chr3 + 130552364 130552432	intron
mir-3666	AGTAAGGTCCGTCAGTTGTAATGAGACCCAGTGCAAGTGTAGATGCCGACTCCGTGGCAGAGTTCAGCGTTTCACACTGCCTGGTCTCTGTCACTCTATTGAATTAGATTG	.....((((..(((((.((...((((((.((.(((.((((((((((.(((((.......)))))..)))))).)))))))))))))))....))...)))))....)))).	chr3 + 147156352 147156463	intron	100	0	-32.3	no		Primates	b, c		mir-3666	intron	100	A	0		Primates	anotation	AGTAAGGTCCGTCAGTTGTAATGAGACCCAGTGCAAGTGTAGATGCCGACTCCGTGGCAGAGTTCAGCGTTTCACACTGCCTGGTCTCTGTCACTCTATTGAATTAGATTG	chr3 + 147156352 147156463	intron
mir-6132	TGCTATTGTCTTACTGCTACAGCAGGGCTGGGGATTGCAGTATCCGCTGTTGCTGCTGCTCCCAGTCCTGCCTCTGCTGCTACCTAGTCCAGCCTCACTGCATCCCAGA	.(((...(.((....((..((((((((((((((...((((((........))))))...))))))))))))...))..)).....)).).)))....(((.....))).	chr3 + 149536207 149536316	intron	100	0	-37.2	no	mir-6132	Primates	a, b		mir-6132	intron	100	A	0	mir-6132	Primates	Ref1	TGCTATTGTCTTACTGCTACAGCAGGGCTGGGGATTGCAGTATCCGCTGTTGCTGCTGCTCCCAGTCCTGCCTCTGCTGCTACCTAGTCCAGCCTCACTGCATCCCAGA	chr3 + 149536207 149536316	intron
mir-3654	TTCATGAGCTGCAATCTCATCACTGGAATGTTCCAGCGACTGGACAAGCTGAGGAA	.((.(.((((....(((..((.(((((....))))).))..)))..)))).).)).	chr3 + 157823920 157823976	intron	100	0	-16	no		Primates	b, c		mir-3654	intron	100	A	0		Primates	anotation	TTCATGAGCTGCAATCTCATCACTGGAATGTTCCAGCGACTGGACAAGCTGAGGAA	chr3 + 157823920 157823976	intron
mir-622	AGAGGAGCTAGACAAGTACTGGTCTCAGCAGATTGAGGAGAGCACCACAGTGGTCACCACACAGTCTGCCGAGGTTGGAGCTGCTGAGACG	..((.((((.........((((((((.((((((((.((.((.(((....))).)).))...)))))))).)))))))))))).))......	chr3 + 158252055 158252146	intron	94.51	1	-30.7	no	mir-622	Primates	a, b		mir-622	intron	94.51	B	0	mir-622	Primates	Ref1	AGAGGAGCTAGACAAGTACTGGTCTCAGCAGATTGAGGAGAGCACCACAGTGGTCACCACACAGTCTGCCGAGGTTGGAGCTGCTGAGACG	chr3 + 158252055 158252146	intron
mir-592	TGATATTATGCCATGACATTGTGTCAATATGCGATGATGTGTTGTGATGGCACAGCGTCATCACGTGGTGACGCAACATCATGACGTAAGACGTCACAACGCCAGTTAA	((((.(((((.(((((..((((((((.((((.((((((((..((((....)))))))))))).)))).))))))))..))))).)))))...)))).(((....)))..	chr3 - 159914269 159914378	intron	100	0	-39.7	no	mir-592	Mammals	a, b		mir-592	intron	100	A	0	mir-592	Mammalia	Ref1	TGATATTATGCCATGACATTGTGTCAATATGCGATGATGTGTTGTGATGGCACAGCGTCATCACGTGGTGACGCAACATCATGACGTAAGACGTCACAACGCCAGTTAA	chr3 - 159914269 159914378	intron
mir-593	CCCCCAGAGTGTGTCAGGCATCAGCCAGGCATCGCTCAGCCCCTTTCCCTCTGGGGGAGCAAGGAGTGGTGCTGGGTTTGTCTCTGCTGGGGTTTCTCCT	.((((((((......(((((..((((.((((((((((.(((((((.......))))).))...)))))))))).))))))))))).))))))........	chr3 + 160937621 160937721	intron	100	0	-44.1	no	mir-593	Primates	a, b		mir-593	intron	100	A	0	mir-593	Primates	Ref1	CCCCCAGAGTGTGTCAGGCATCAGCCAGGCATCGCTCAGCCCCTTTCCCTCTGGGGGAGCAAGGAGTGGTGCTGGGTTTGTCTCTGCTGGGGTTTCTCCT	chr3 + 160937621 160937721	intron
mir-129-1	TGGATCTTTTTGCGGTCTGGGCTTGCTGTTCCTCTCAACAGTAGTCAGGAAGCCCTTACCCCAAAAAGTATCT	.(((((((((((.(((..((((((.(((..(..((....))..).))).))))))..))).))))))).))))	chr3 + 161064680 161064753	space	100	0	-29.7	no	mir-129	Vertebrates	a, b		mir-129-1	space	100	A	0	mir-129	Vertebrata	Ref1	TGGATCTTTTTGCGGTCTGGGCTTGCTGTTCCTCTCAACAGTAGTCAGGAAGCCCTTACCCCAAAAAGTATCT	chr3 + 161064680 161064753	space
mir-182	CACAGCTGCTTGCCTCCCCCTGTTTTTGGCAATGGTAGAACTCACACTGGTGAGGTAATGGGATCCGGTGGTTCTAGACTTGCCAACTACGGGGCGAGGGCTCAGCCGGCAC	....((((((.((((.(((((((..(((((((...((((((...((((((..............))))))))))))...)))))))..)))))).).))))..)).))))..	chr3 - 162480895 162481007	space	100	0	-47.4	yes	mir-182	Vertebrates	a, b		mir-182	space	100	A	1	mir-182	Vertebrata	Ref1	CACAGCTGCTTGCCTCCCCCTGTTTTTGGCAATGGTAGAACTCACACTGGTGAGGTAATGGGATCCGGTGGTTCTAGACTTGCCAACTACGGGGCGAGGGCTCAGCCGGCAC	chr3 - 162480895 162481007	space
mir-96	TGGCCGATTTTGGCACTAGCACATTTTTGCTTGTGTCTCTCCGCTCTGAGCAATCATGTGCAGTGCCAATATGGGAAA	...((.((.((((((((.((((((..(((((((((......)))...))))))..)))))))))))))).)).))...	chr3 - 162485442 162485520	space	100	0	-34.8	yes	mir-96	Vertebrates	a, b		mir-96	space	100	A	1	mir-96	Vertebrata	Ref1	TGGCCGATTTTGGCACTAGCACATTTTTGCTTGTGTCTCTCCGCTCTGAGCAATCATGTGCAGTGCCAATATGGGAAA	chr3 - 162485442 162485520	space
mir-183	CCGCAGAACGTGACTCCTGTTCTGTGTATGGCACTGGTAGAATTCACTGTGAACAGTCTCGGTCAGTGAATTACCGAAGGGCCATAAACAGAGCAGAGACAGATCCACGA	........((((..(((((((((((.((((((.((((((..(((((((((((......)))..))))))))))))..)).)))))).))))))))).....))..)))).	chr3 - 162485646 162485756	space	100	0	-39.8	yes	mir-183	Vertebrates	a, b		mir-183	space	100	A	1	mir-183	Vertebrata	Ref1	CCGCAGAACGTGACTCCTGTTCTGTGTATGGCACTGGTAGAATTCACTGTGAACAGTCTCGGTCAGTGAATTACCGAAGGGCCATAAACAGAGCAGAGACAGATCCACGA	chr3 - 162485646 162485756	space
mir-3553	TGGATCTGTCTCTGCTCTGTTTATGGCCCTTCGGTAATTCACTGACCGAGACTGTTCACAGTGAATTCTACCAGTGCCATACACAGAACAGGAGTCACGTTCTGCGG	.((((.((.((((..(((((.((((((.((..((((((((((((...(((....))).))))))))..)))))).)))))).)))))...)))).)).)))).....	chr3 + 162485649 162485756	space	95.28	0	-37.5	no		Vertebrates	b, c		mir-3553	space	95.28	A	0		Vertebrata	anotation	TGGATCTGTCTCTGCTCTGTTTATGGCCCTTCGGTAATTCACTGACCGAGACTGTTCACAGTGAATTCTACCAGTGCCATACACAGAACAGGAGTCACGTTCTGCGG	chr3 + 162485649 162485756	space
mir-335	GGAAATGATTTATTTTGAGCGGGGGTCAAGAGCAATAACGAAAAATGTTTGTCATAAACCGTTTTTCATTATTGCTCCTGACCTCCTCTCATTTGCTATATTCAATTAAGTAAGT	................(((.((((((((.(((((((((.((((((((.((......)).)))))))).))))))))).)))))))).)))(((((((.((......)))))))))	chr3 + 163256343 163256458	intron	100	0	-41.8	yes	mir-335	Mammals	a, b		mir-335	intron	100	A	1	mir-335	Mammalia	Ref1	GGAAATGATTTATTTTGAGCGGGGGTCAAGAGCAATAACGAAAAATGTTTGTCATAAACCGTTTTTCATTATTGCTCCTGACCTCCTCTCATTTGCTATATTCAATTAAGTAAGT	chr3 + 163256343 163256458	intron
mir-29a	CCCCTTAGAGGATGACTGATTTCTTTTGGTGTTCAGAGTCAATATAATTTTCTAGCACCATCTGAAATCGGTTATAATGATTGGGGA	((((....(..((((((((((((...(((((((.((((...........)))))))))))...))))))))))))..)....)))).	chr3 - 163632511 163632598	space	100	0	-34.1	yes	mir-29	Vertebrates	a, b		mir-29a	space	100	A	1	mir-29	Vertebrata	Ref1	CCCCTTAGAGGATGACTGATTTCTTTTGGTGTTCAGAGTCAATATAATTTTCTAGCACCATCTGAAATCGGTTATAATGATTGGGGA	chr3 - 163632511 163632598	space
mir-29b-1	CTTCTTCAGGAAGCTGGTTTCATATGGTGGTTTAGATTTAAATAGTGATTGTCTAGCACCATTTGAAATCAGTGTTCTTGGGGGAG	((((((((((((((((((((((.((((((..((((((.............)))))))))))).)))))))))).))))))))))))	chr3 - 163633233 163633319	space	100	0	-37.7	yes	mir-29	Vertebrates	a, b		mir-29b-1	space	100	A	1	mir-29	Vertebrata	Ref1	CTTCTTCAGGAAGCTGGTTTCATATGGTGGTTTAGATTTAAATAGTGATTGTCTAGCACCATTTGAAATCAGTGTTCTTGGGGGAG	chr3 - 163633233 163633319	space
mir-548aq	AAAAGTAATTGCGTTTTTGCCATTACTTTTAAGTGGCAAAAACTGCAATTACTTTTGCA	((((((((((((((((((((((((.......)))))))))))).))))))))))))...	chr3 - 164809623 164809682	space	94.83	0	-28.7	yes	mir-548	Primates	a		mir-548aq	space	94.83	A	1	mir-548	Primates	Ref2	AAAAGTAATTGCGTTTTTGCCATTACTTTTAAGTGGCAAAAACTGCAATTACTTTTGC	chr3 - 164809623 164809682	space
mir-6133	GGAATGTCACCTGTGTGTTTTCTCTGCATACCCTCTTCATTGTTCTACTGAAGACTGGTCTCTTCATGTGTGAGGGAGGAGGTTGGGTATTGAGAGAAAACAGGGGGC	.....(((.(((...((((((((((..((((((.((((.((.((((((((((((......)))))).))).))).)).))))..))))))..))))))))))))))))	chr3 + 166120298 166120406	intron	99.07	0	-42.7	no	mir-6133	Primates	a, b		mir-6133	intron	99.07	A	0	mir-6133	Primates	Ref1	GGAATGTCACCTGTGTGTTTTCTCTGCATACCCTCTTCATTGTTCTACTGAAGACTGGTCTCTTCATGTGTGAGGGAGGAGGTTGGGTATTGAGAGAAAACAGGGGGC	chr3 + 166120298 166120406	intron
mir-6509	TTTTTGTGTGTAAAATTAGGTAGTGGCAGTGGAAGACTATATTAATCAGCTTTTCACTGCCACTACCTAATTTCTCAGATGGAAA	.((((((.((..(((((((((((((((((((((((.((.........)).)))))))))))))))))))))))..)).)))))).	chr3 - 168142550 168142635	intron	95.29	0	-41.1	no		Primates	b, c		mir-6509	intron	95.29	A	0		Primates	anotation	TTTTTGTGTGTAAAATTAGGTAGTGGCAGTGGAAGACTATATTAATCAGCTTTTCACTGCCACTACCTAATTTCTCAGATGGAAA	chr3 - 168142550 168142635	intron
mir-490	TGGAGGCCTTGCTGGTTTGGAAAGTTCATTGTTCGACACCATGGATCTCCAGGTGGGTCAAGTTTAGAGATGCACCAACCTGGAGGACTCCATGCTGTTGAGCTGTTCACAAGCAGCGGACACTTCCA	((((((..((((((.(((((((........((((((((.(((((((((((((((.(((((..........)).))).)))))))))..)))))).))))))))..))).))))))))))...))))))	chr3 + 169871013 169871141	intron	100	0	-52.8	no	mir-490	Vertebrates	a, b		mir-490	intron	100	A	0	mir-490	Vertebrata	Ref1	TGGAGGCCTTGCTGGTTTGGAAAGTTCATTGTTCGACACCATGGATCTCCAGGTGGGTCAAGTTTAGAGATGCACCAACCTGGAGGACTCCATGCTGTTGAGCTGTTCACAAGCAGCGGACACTTCCA	chr3 + 169871013 169871141	intron
mir-4468	AGTCTTCTCCTGGGGCTTTGGTTGCTATGGTTGGCTGGGCCACTCAGAGCAGAAGGATGAGATG	.(((((.((((...((((((((.(((..((....)).))).)).))))))...)))).))))).	chr3 + 171116613 171116677	space	96.88	0	-22.7	no		Primates	b, c		mir-4468	space	96.88	A	0		Primates	anotation	AGTCTTCTCCTGGGGCTTTGGTTGCTATGGTTGGCTGGGCCACTCAGAGCAGAAGGATGAGATG	chr3 + 171116613 171116677	space
mir-10399	AATTACAGATTGTCTCAGAGAAAACAGATGAGTTACTCTCTCAGACAAGCTGTAGGTC	..((((((.((((((.(((((.(((......)))..))))).)))))).))))))...	chr3 - 172024765 172024823	space	96.55	0	-19.5	yes		Primates	b, c		mir-10399	space	96.55	A	2		Primates	anotation	AATTACAGATTGTCTCAGAGAAAACAGATGAGTTACTCTCTCAGACAAGCTGTAGGTC	chr3 - 172024765 172024823	space
mir-7186	CTGTGGTTCCTGTATGAAGACAGTAGCGGTGTCTTCATGCAGGAACCACATTG	.(((((((((((((((((((((.......)))))))))))))))))))))...	chr3 - 172228116 172228169	space	100	0	-36.9	yes		Cercopithecidae	a, b		mir-7186	space	100	A	3		Cercopithecidae	Ref1	CTGTGGTTCCTGTATGAAGACAGTAGCGGTGTCTTCATGCAGGAACCACATTG	chr3 - 172228116 172228169	space
mir-6892	GTAAGGGACCGCAGAGTAGGAAAAGCAGGGCCCAGGGCCAGAGAGACAGGGGATAGAGCTATGGAGGATGGTGTCCTCCTGTCTGCATCTCTCTTCCCTCTCCCACCCCTTGCAG	(((((((......(((..((((......((((...))))(((((((((((((((...(((((.....))))))))).))))))....))))).))))..)))....)))))))..	chr3 + 176566169 176566284	intron	93.91	0	-44.3	no		Primates	b, c		mir-6892	intron	93.91	A	0		Primates	anotation	GTAAGGGACCGCAGAGTAGGAAAAGCAGGGCCCAGGGCCAGAGAGACAGGGGATAGAGCTATGGAGGATGGTGTCCTCCTGTCTGCATCTCTCTTCCCTCTCCCACCCCTTGCAG	chr3 + 176566169 176566284	intron
mir-703	TAAAACCTTCAGAAGGAAAGGAGAATGTTTTGTGGACCACGTTGGTTTTCTTTTTTGTGTGTGGCAGTTTTA	((((((((.((.(.((((((((((((....((((...))))...)))))))))))).).)).))..))))))	chr3 - 177616535 177616607	intron	98.44	0	-15.9	no	mir-703	Vertebrates	b, c		mir-703	intron	98.44	A	0	mir-703	Vertebrata	anotation	TAAAACCTTCAGAAGGAAAGGAGAATGTTTTGTGGACCACGTTGGTTTTCTTTTTTGTGTGTGGCAGTTTTA	chr3 - 177616535 177616607	intron
mir-671	GCAGGTGAACTGGCAGGCCAGGAAGAGGAGGAAGCCCTGGAGGGGCTGGAGGTGATGGATGTTTTCCTCCGGTTCTCAGGGCTCCACCTCTTTCGGGCCGTAGAGCCAGGGCTGGTGC	(((...(..(((((.((((.((((((((.(((.((((((..(((((((((((.((.......)).)))))))))))))))))))).)))))))).)))).....)))))..)...)))	chr3 + 183929574 183929692	CDS	100	0	-66.9	yes	mir-671	Mammals	a, b		mir-671	CDS	100	A	1	mir-671	Mammalia	Ref1 Ref2	GCAGGTGAACTGGCAGGCCAGGAAGAGGAGGAAGCCCTGGAGGGGCTGGAGGTGATGGATGTTTTCCTCCGGTTCTCAGGGCTCCACCTCTTTCGGGCCGTAGAGCCAGGGCTGGTGC	chr3 + 183929574 183929692	cds
mir-153-2	AGCGGTGGCCAGTGTCATTTTTGTGATGTTGCAGCTAGTAATATGAGCCCAGTTGCATAGTCACAAAAGTGATCATTGGAAACTGTG	.(((((..(((((((((((((((((((..(((((((.((.......))..)))))))..))))))))))))).))))))..))))).	chr3 - 190524800 190524887	intron	100	0	-42.3	yes	mir-153	Vertebrates	a, b		mir-153-2	intron	100	A	5	mir-153	Vertebrata	Ref1	AGCGGTGGCCAGTGTCATTTTTGTGATGTTGCAGCTAGTAATATGAGCCCAGTTGCATAGTCACAAAAGTGATCATTGGAAACTGTG	chr3 - 190524800 190524887	intron
mir-595	CCTGCATGCGTTTAACACCAGCACACTCAGTATAGTCTTGTAAGGAGCAGGCTGAAGTGTGCTGTGGTGTGTCTGGAGGA	(((.((.((.....(((((((((((((((((....((((...))))....)))).)))))))..)))))))).)).))).	chr3 - 191464266 191464346	intron	100	0	-31.4	no	mir-595	Primates	a		mir-595	intron	100	A	0	mir-595	Primates	Ref1	CCTGCATGCGTTTAACACCAGCACACTCAGTATAGTCTTGTAAGGAGCAGGCTGAAGTGTGCTGTGGTGTGTCTGGAGGA	chr3 - 191464266 191464346	intron
mir-5707	TCTAAGAACACGTTTGAATGCTGTACAAGACACATACGTGAACCTTGTACCACATGCACAGCTTTCAAACATGCTCTTATA	..(((((.((.(((((((.((((((((((.(((....)))...))))).........))))).))))))).)).)))))..	chr3 + 191522667 191522748	space	93.83	1	-24.5	no		Primates	b		mir-5707	space	93.83	B	0		Primates		TCTAAGAACACGTTTGAATGCTGTACAAGACACATACGTGAACCTTGTACCACATGCACAGCTTTCAAACATGCTCTTATA	chr3 + 191522667 191522748	space
mir-6837	GTGGGACGAGGGCCAGCAGGGAATGTCAGGGCCACCCCTGACCTTCCTTGTGACTCTGCTGCAG	((((.(.(((.....((((((((.(((((((....))))))).))))))))..)))).))))..	chr3_KE145554_random + 12965 13029	intron	95.31	1	-30.8	no		Primates	b, c		mir-6837	intron	95.31	B	0		Primates	anotation	GTGGGACGAGGGCCAGCAGGGAATGTCAGGGCCACCCCTGACCTTCCTTGTGACTCTGCTGCAG	chr3_KE145554_random + 12965 13029	intron
mir-4644	GCGGCGGTGCTCTGCCTCTTTCTCCACCACCCTGGTCCAGGTCCACAGCAGTGGGGAGAGAAAAGAGACAGAAGGATGGCCGTG	(((((.((.(((((.((((((((((.((((.(((...........)))..)))))))))...))))).))).)).)).))))).	chr4 - 305549 305633	intron	97.62	1	-38.8	no		Primates	b, c		mir-4644	intron	97.62	B	0		Primates	anotation	GCGGCGGTGCTCTGCCTCTTTCTCCACCACCCTGGTCCAGGTCCACAGCAGTGGGGAGAGAAAAGAGACAGAAGGATGGCCGT	chr4 - 305549 305633	intron
mir-548b	CAGGCTATGTATTTAGGTTGGTGCAAAAGTAATTGCGGCTTGGGCCTTTATTTTCAATGGCAAAAACCTCAATTGCTTTTGTGCCAACCTAATACTT	........(((((.(((((((((((((((((((((.((.((..(((............)))..)).)).))))))))))))))))))))))))))..	chr4 - 23053545 23053642	intron	98.97	0	-43.3	no	mir-548	Primates	a		mir-548b	intron	98.97	A	0	mir-548	Primates	Ref1 Ref2	CAGGCTATGTATTTAGGTTGGTGCAAAAGTAATTGCGGCTTGGGCCTTTATTTTCAATGGCAAAAACCTCAATTGCTTTTGTGCCAACCTAATACTT	chr4 - 23053545 23053642	intron
mir-548aj-1	ATTGGTGTAAAAGTAATTGCAGGTTATGCCATTAAAAGTAATGGTAAAAATTGCAATTACTTTTACATTAAC	.(((((((((((((((((((((....((((((((....))))))))....))))))))))))))))))))).	chr4 - 36279438 36279510	space	97.22	1	-33.1	no	mir-548	Primates	b, c		mir-548aj-1	space	97.22	B	0	mir-548	Primates	anotation	ATTGGTGTAAAAGTAATTGCAGGTTATGCCATTAAAAGTAATGGTAAAAATTGCAATTACTTTTACATTAAC	chr4 - 36279438 36279510	space
mir-3662	TGTGTTTTCCTCAACGCTCACAGTTACACTTCTTACTCTCAATCCATTCATATTGAAAATGATGAGTAGTGACTGATGAAGCACAAATCAGCCAA	((((((...........((((((((((((((.(((...(((((........)))))...))).)))).))))))).)))))))))..........	chr4 - 39278361 39278456	intron	100	0	-19.5	no		Primates	b, c		mir-3662	intron	100	A	0		Primates	anotation	TGTGTTTTCCTCAACGCTCACAGTTACACTTCTTACTCTCAATCCATTCATATTGAAAATGATGAGTAGTGACTGATGAAGCACAAATCAGCCAA	chr4 - 39278361 39278456	intron
mir-548c	TGTGATGTATTAGGTTGATGCAAAAGTAATTGGGGTTTTTTGTCATTAAAAGTAGTGACAAAACCGGCAATTACTTCTGCACCAAACTAATATAA	.....((((((((..((.((((.(((((((((.(((((..((((((((....)))))))))))))..))))))))).)))).))..)))))))).	chr4 + 39546065 39546160	space	100	0	-36.7	no	mir-548	Primates	a		mir-548c	space	100	A	0	mir-548	Primates	Ref1	TGTGATGTATTAGGTTGATGCAAAAGTAATTGGGGTTTTTTGTCATTAAAAGTAGTGACAAAACCGGCAATTACTTCTGCACCAAACTAATATAA	chr4 + 39546065 39546160	space
mir-7188	ATGTTGACTGTGTTTGGCACACAGGACACGGACCTTCATGGAAGTCCTTGCTCTGCGTGGCATCTGTCAGCTTTTCACC	..((((((......((.(((.((((.((.((((.(((...))))))).)).)))).))).))...))))))........	chr4 - 40665175 40665254	3UTR	94.92	0	-25.9	no		Cercopithecidae	a, b		mir-7188	3utr	94.92	A	0		Cercopithecidae	Ref1	TGTTTGGCACACAGGACACGGACCTTCATGGAAGTCCTTGCTCTGCGTGGCATCTGTCA	chr4 - 40665185 40665244	3UTR
mir-4430	GTGGAGGCTGCAGTGAGCGGAGATCGCACCACTGCACTCCAACCTGGGCGA	.(((((..(((((((.(((.....)))..))))))))))))..........	chr4 + 40818904 40818955	space	93.88	1	-20.2	no		Primates	b		mir-4430	space	93.88	B	0		Primates		GTGGAGGCTGCAGTGAGCGGAGATCGCACCACTGCACTCCAACCTGGGCGA	chr4 + 40818904 40818955	space
mir-3145	TGAAAGGAAAAAATGTATTCATATAAGGTCAACTCCAAACATTCAAAACGCATTGTTGAATGGAATTAGGTATTTTGAGTGTTTGGAATTGAACTTGTATGCACTGATACA	.............((((((((((((((.((((.(((((((((((((((.((...(((......)))...)).))))))))))))))).)))).))))))))....))))))	chr4 - 42762775 42762886	intron	100	0	-36.7	yes	mir-3145	Primates	a, b		mir-3145	intron	100	A	1	mir-3145	Primates	Ref1	TGAAAGGAAAAAATGTATTCATATAAGGTCAACTCCAAACATTCAAAACGCATTGTTGAATGGAATTAGGTATTTTGAGTGTTTGGAATTGAACTTGTATGCACTGATACA	chr4 - 42762775 42762886	intron
mir-7187	AGCTCCGTTATAATCTATAGGACCACATATACAGCGGTGGTCCTATAGGATTATAACGGAGCTGA	((((((((((((((((((((((((((..........))))))))))).)))))))))))))))..	chr4 - 47976506 47976571	intron	100	0	-41.6	no		Cercopithecidae	a, b		mir-7187	intron	100	A	0		Cercopithecidae	Ref1	AGCTCCGTTATAATCTATAGGACCACATATACAGCGGTGGTCCTATAGGATTATAACGGAGCTGA	chr4 - 47976506 47976571	intron
mir-548aq	AAAAGTAATTGTGATTTTTGCCATTACTTTTAGTGGCAAAAAACTGCAATTACTTTTGCA	(((((((((((((.((((((((((((....)))))))))))).).))))))))))))...	chr4 + 48241741 48241801	intron	94.83	0	-24.8	no	mir-548	Primates	a		mir-548aq	intron	94.83	A	0	mir-548	Primates	Ref2	AAAAGTAATTGTGATTTTTGCCATTACTTTTAGTGGCAAAAAACTGCAATTACTTTTGC	chr4 + 48241741 48241801	intron
mir-548j	AAAAGTAATTGTGGGCTTTGCTATAGAAAGTAAAGGTAAAAACCGCAATTACTTTTGC	((((((((((((((..((((((............))))))..))))))))))))))..	chr4 + 59133017 59133075	space	100	0	-21.9	yes	mir-548	Primates	a, b		mir-548j	space	100	A	1	mir-548	Primates	Ref1	AAAAGTAATTGTGGGCTTTGCTATAGAAAGTAAAGGTAAAAACCGCAATTACTTTTGC	chr4 + 59133017 59133075	space
mir-4466	GCGCGGGTGCGGGCCGGCGGGGTCGAAGCCACCCGGCCCAGCCCGGCCCGGCGA	((.(((((.(((((.(((.((((.(....))))).)))..))))))))))))..	chr4 - 63127155 63127209	space	94.44	0	-35	no		Primates	b		mir-4466	space	94.44	A	0		Primates		GCGCGGGTGCGGGCCGGCGGGGTCGAAGCCACCCGGCCCAGCCCGGCCCGGCGA	chr4 - 63127155 63127209	space
mir-587	CTCCTAGGCACCCTCTTTCCACAGGTGATGAGTTACAGGGCCCAGGGAATGTGTCTGCACCTGTGACTCATCACTGGTGGAAGCCCATAC	......(((.......((((((.((((((((((((((((...((((.......))))..)))))))))))))))).))))))))).....	chr4 - 66535918 66536008	space	100	0	-42.4	no	mir-587	Primates	a		mir-587	space	100	A	0	mir-587	Primates	Ref1	CTCCTAGGCACCCTCTTTCCACAGGTGATGAGTTACAGGGCCCAGGGAATGTGTCTGCACCTGTGACTCATCACTGGTGGAAGCCCATAC	chr4 - 66535918 66536008	space
mir-548ai	GTATTAGGTTGGTGCAAAGGTAATTGCAGTTTTTCCCATTTAAAACATGGAAAAAAAATCGTAGTTACTTTTGCACCAACCTAATAAT	.((((((((((((((((((((((((((.((((((.((((.......))))...)))))).))))))))))))))))))))))))))..	chr4 - 74677797 74677885	space	93.18	0	-44.3	no	mir-548	Primates	b		mir-548ai	space	93.18	A	0	mir-548	Primates		GTATTAGGTTGGTGCAAAGGTAATTGCAGTTTTTCCCATTTAAAACATGGAAAAAAAATCGTAGTTACTTTTGCACCAACCTAATAA	chr4 - 74677797 74677885	space
mir-2113	TTTTCAAAGCAATGTGTGACAGGTACAGGGACAAATCCCGTTAATAAGTAAGAGGATTTGTGCTTGGCTCTGTCACATGCCACTTTGAAAA	.((((((((...(((((((((((..((((.((((((((..(((.....)))..)))))))).))))..)))))))))))...)))))))).	chr4 - 75796553 75796644	space	100	0	-40.5	no		Primates	b, c		mir-2113	space	100	A	0		Primates	anotation	TTTTCAAAGCAATGTGTGACAGGTACAGGGACAAATCCCGTTAATAAGTAAGAGGATTTGTGCTTGGCTCTGTCACATGCCACTTTGAAAA	chr4 - 75796553 75796644	space
mir-4463	AGCAGATTATTGGTCACCACCTCCAGAGTTTCTGAATTTGTGAGACTGGGGTGGGGCCTGAGAACTTGC	.((((.((...((((.(((((((...((((((.........)))))))))))))))))....)).))))	chr4 - 98566448 98566517	space	94.03	0	-25.2	no		Primates	b		mir-4463	space	94.03	A	0		Primates		AGCAGATTATTGGTCACCACCTCCAGAGTTTCTGAATTTGTGAGACTGGGGTGGGGCCTGAGAACTTGC	chr4 - 98566448 98566517	space
mir-703	AGACTGGTTAATGATAACAATGCATCGTAAAACCTTCAGAAGGAAAGGAGAATGTTTTGTGGACCACTTTGGTTTTCTTTTTTGCGTGTGGCAGTTTTAAGTTATTAGTTTTTAAAATCAGT	..(((((((..(((.(((((((.....((((((..(((.(.(.(((((((((.........(((((...)))))))))))))).).).)))..))))))...)))).))).))).)))))))	chr4 + 100402016 100402138	intron	97.25	1	-22.8	no	mir-703	Vertebrates	b, c		mir-703	intron	97.25	B	0	mir-703	Vertebrata	anotation	AGACTGGTTAATGATAACAATGCATCGTAAAACCTTCAGAAGGAAAGGAGAATGTTTTGTGGACCACTTTGGTTTTCTTTTTTGCGTGTGGCAGTTTTAAGTTATTAGTTTTTAAAATCAGT	chr4 + 100402016 100402138	intron
mir-4282	GGTGAAGTTCCAGGGGAAGATTTTAGTATGCCACATTTCTAAAATTTGCATCCAGGAACATCATCCT	(((((.(((((.(((..(((((((((.(((...)))..)))))))))...))).))))).)))))..	chr4 + 101012530 101012597	space	100	0	-22.6	no		Primates	b, c		mir-4282	space	100	A	0		Primates	anotation	GGTGAAGTTCCAGGGGAAGATTTTAGTATGCCACATTTCTAAAATTTGCATCCAGGAACATCATCCT	chr4 + 101012530 101012597	space
mir-30a	GCGACTGTAAACATCCTCGACTGGAAGCTGTGAAGCCATAGATGGGCTTTCAGTCGGATGTTTGCAGCTGC	(((.((((((((((((..((((((((((((((....))).....))))))))))))))))))))))).)))	chr4 + 102526871 102526942	space	100	0	-35.9	yes	mir-30	Vertebrates	a, b		mir-30a	space	100	A	1	mir-30	Vertebrata	Ref1	GCGACTGTAAACATCCTCGACTGGAAGCTGTGAAGCCATAGATGGGCTTTCAGTCGGATGTTTGCAGCTGC	chr4 + 102526871 102526942	space
mir-30c-2	GACAGATACTGTAAACATCCTACACTCTCAGCTGTGGAAAGTAAGAAAGCTGGGAGAAGGCTGTTTACTCTCTCTGCCTT	..((((....(((((((.(((...(((((((((..............))))))))).))).)))))))....))))....	chr4 + 102552977 102553057	space	100	0	-28.5	yes	mir-30	Vertebrates	a, b		mir-30c-2	space	100	A	1	mir-30	Vertebrata	Ref1	GACAGATACTGTAAACATCCTACACTCTCAGCTGTGGAAAGTAAGAAAGCTGGGAGAAGGCTGTTTACTCTCTCTGCCTT	chr4 + 102552977 102553057	space
mir-7975	GAGCAAAGAGCAGGAGGACAGGGGATTAATCTCCCAAGGGAGGTCCCCTGATCCGAGTCACGGCACCA	..((...((...(((...((((((((....((((....)))))))))))).)))...))...))....	chr4 + 109874287 109874355	intron	95.59	1	-26.4	no		Primates	b		mir-7975	intron	95.59	B	0		Primates		GAGCAAAGAGCAGGAGGACAGGGGATTAATCTCCCAAGGGAGGTCCCCTGATCCGAGTCACGGCACCA	chr4 + 109874287 109874355	intron
mir-548u	ATTAGGATGGTGCAAAAGTAATTGTGGTTTTTGTCTTTACTTTTAATGGCAAAGACTGCAATTACTTTTGCACCAACCCAAT	....((.((((((((((((((((((((((((((((.(((....))).)))))))))))))))))))))))))))).))....	chr4 - 113288702 113288784	intron	96.3	0	-43.9	yes	mir-548	Primates	a, b		mir-548u	intron	96.3	A	1	mir-548	Primates	Ref2	ATTAGGATGGTGCAAAAGTAATTGTGGTTTTTGTCTTTACTTTTAATGGCAAAGACTGCAATTACTTTTGCACCAACCCAAT	chr4 - 113288702 113288784	intron
mir-133b	CCTCAGAAGAAAGATGCCCCCTGCTCTGGCTGGTCAAACGGAACCAAGTCCGTCTTCCTGAGAGGTTTGGTCCCCTTCAACCAGCTACAGCAGGGCTGGCAATGCCCAGTCCTTGGAGA	..............(((((((((((.((((((((..((.((.((((((.((.((((...)))))))))))).)).))..)))))))).)))))))..))))....(((.....)))...	chr4 - 118507476 118507595	space	100	0	-47.8	no	mir-133	Vertebrates	a, b		mir-133b	space	100	A	0	mir-133	Vertebrata	Ref1	CCTCAGAAGAAAGATGCCCCCTGCTCTGGCTGGTCAAACGGAACCAAGTCCGTCTTCCTGAGAGGTTTGGTCCCCTTCAACCAGCTACAGCAGGGCTGGCAATGCCCAGTCCTTGGAGA	chr4 - 118507476 118507595	space
mir-206	TGCTTCCCGAGGCCACATGCTTCTTTATATCCCCATATGGATTACTTTGCTATGGAATGTAAGGAAGTGTGTGGTTTCGGCAAGTG	.((((.((((((((((((((((((((((((..(((((.(.(......).)))))).)))))))))))))))))))))))).)))).	chr4 - 118512055 118512141	space	100	0	-43.7	yes	mir-1	Vertebrates	a, b		mir-206	space	100	A	1	mir-1	Vertebrata	Ref1	TGCTTCCCGAGGCCACATGCTTCTTTATATCCCCATATGGATTACTTTGCTATGGAATGTAAGGAAGTGTGTGGTTTCGGCAAGTG	chr4 - 118512055 118512141	space
mir-586	ATGGGGTAAAACCATTATGCATATTGTATTTTTAGGTCCCAATACGTGTGGACCCTAAAAATGCAATGCATAATGGTTTTATACTCTTTATCTTCTTAT	..((((((((((((((((((((..(((((((((((((((((.....)).))).))))))))))))))))))))))))))))).))).............	chr4 + 125341002 125341101	intron	100	0	-42.1	no	mir-586	Primates	a		mir-586	intron	100	A	0	mir-586	Primates	Ref1	ATGGGGTAAAACCATTATGCATATTGTATTTTTAGGTCCCAATACGTGTGGACCCTAAAAATGCAATGCATAATGGTTTTATACTCTTTATCTTCTTAT	chr4 + 125341002 125341101	intron
mir-4647	CCAGGAGGGTGAAGTGAAGATGGTGCTGTGTTGTGGAAAGGGGATGCAGATCCCTGCCCAGCACCACCACCTCCTATGCTCCTGG	(((((((.((..((.((.(.(((((..((((((.((...((((((....)))))).)))))))))))))).)))))).)))))))	chr4 + 126268578 126268663	3UTR	96.25	2	-39.8	no		Primates	b		mir-4647	3utr	96.25	C	0		Primates		CCAGGAGGGTGAAGTGAAGATGGTGCTGTGTTGTGGAAAGGGGATGCAGATCCCTGCCCAGCACCACCACCTCCTATGCTCCTGG	chr4 + 126268578 126268663	3UTR
mir-6780b	GAGCCTGGGGAAGGCTTGGCGGACAAGACACATGAGCAGTGCCTCTACTTCACGCCTCTCCCTTGTCTCCTTTCCCTAG	....(((((((((....((.(((((((......(((..(((.........)))..)))...))))))))))))))))))	chr4 - 127123249 127123328	intron	93.67	0	-23.3	no		Primates	b		mir-6780b	intron	93.67	A	0		Primates		GAGCCTGGGGAAGGCTTGGCGGACAAGACACATGAGCAGTGCCTCTACTTCACGCCTCTCCCTTGTCTCCTTTCCCTAG	chr4 - 127123249 127123328	intron
mir-4641	GGGTGCGTTTGGGGGGCAGGGGGCAGAGAGGCTCAGAGGACAGCCACCGGGTGCCCATGCCATACTTTTGCCTCAGCCACCAGGTGC	....((((((((..(((..(((((((((.(((...(.((.((.((...)).)))))..)))....))))))))).))).))))))))	chr4 - 129071048 129071135	intron	95.45	0	-33.1	no		Primates	b, c		mir-4641	intron	95.45	A	0		Primates	anotation	GGGGGGCAGGGGGCAGAGAGGCTCAGAGGACAGCCACCGGGTGCCCATGCCATACTTTTGCCTCAG	chr4 - 129071058 129071125	intron
mir-9983	GGAAATGTTCTAGCCAAAAAAGTTTGCCAAGAACCATTGTGTCTTTTTTTTTGCTGGAACATTTCTGG	((((((((((((((.(((((((...(((((......))).))...)))))))))))))))))))))..	chr4 - 131643517 131643585	intron	100	0	-25.2	no		Primates	b, c		mir-9983	intron	100	A	0		Primates	anotation	GGAAATGTTCTAGCCAAAAAAGTTTGCCAAGAACCATTGTGTCTTTTTTTTTGCTGGAACATTTCTGG	chr4 - 131643517 131643585	intron
mir-4462	CTTCCCAGCTGCCCTAAGTCAGGAGTGGCTTTCCTGACGCGGAGGGTGGCTTGGGACA	..(((((((((((((..((((((((.....))))))))....)))))))).)))))..	chr4 + 133136088 133136146	space	96.55	1	-34.3	no		Primates	b, c		mir-4462	space	96.55	B	0		Primates	anotation	CTTCCCAGCTGCCCTAAGTCAGGAGTGGCTTTCCTGACGCGGAGGGTGGCTTGGGACA	chr4 + 133136088 133136146	space
mir-3925	GTGGGAATAGCAAGAGAACTAAAATTAGAGCTTGTCACATCTCCAGACTCCACTTTTAGTTCTCTTGCTATTTCCAC	((((((((((((((((((((((((...(((((.(........).)).)))...))))))))))))))))))))))))	chr4 + 134111252 134111329	space	93.51	1	-38.8	no		Primates	b		mir-3925	space	93.51	B	0		Primates		GTGGGAATAGCAAGAGAACTAAAATTAGAGCTTGTCACATCTCCAGACTCCACTTTTAGTTCTCTTGCTATTTCCAC	chr4 + 134111252 134111329	space
mir-5690	CTTTTAATTTCAGCTACTACCTCTATTAGGATTTGGGAATTATACTAATAGAGGTAGTAGTTGAAATTAAGAG	(((((((((((((((((((((((((((((...............)))))))))))))))))))))))))))))	chr4 + 135109300 135109373	intron	97.26	0	-41	yes		Primates	b, c		mir-5690	intron	97.26	A	1		Primates	anotation	CTTTTAATTTCAGCTACTACCTCTATTAGGATTTGGGAATTATACTAATAGAGGTAGTAGTTGAAATTAAGAG	chr4 + 135109300 135109373	intron
mir-6835	TGATGAGGAGGTAGAAAGTGGCTGAAGTGAGATGTTTGTCTAAAAGCACTTTTCTGTTTCCCAG	...((.((((((((((((((.((......((((....))))...))))).))))))))))))).	chr4 - 136578827 136578891	space	95.31	1	-15.8	no		Primates	b, c		mir-6835	space	95.31	B	0		Primates	anotation	TGATGAGGAGGTAGAAAGTGGCTGAAGTGAGATGTTTGTCTAAAAGCACTTTTCTGTTTCCCAG	chr4 - 136578827 136578891	space
mir-1275	CCTCTGTTAGGAAGGGTGTTGGGGGAGAGGTTGTCCTGTGTCTGTAAATATGCAAAACTTATTTTCCCCAAGGCTGAGGGA	((((..........(((.((((((((((....((..(((((........)))))..))...)))))))))).)))))))..	chr4 + 136827181 136827262	space	95	1	-25	no	mir-1275	Primates	c		mir-1275	space	95	B	0	mir-1275	Primates	anotation	CCTCTGTTAGGAAGGGTGTTGGGGGAGAGGTTGTCCTGTGTCTGTAAATATGCAAAACTTATTTTCCCCAAGGCTGAGGGA	chr4 + 136827181 136827262	space
mir-7159	TTCAACAAGGGTGTAGGATGGCCAGGGAAGCATGCTGGGCCTTGGCATTTCTATGTTAGTTGGAAG	((((((...(((((((((..(((((((............)))))))..))))))))).))))))..	chr4 - 136920915 136920981	space	96.97	0	-21.2	no		Primates	b, c		mir-7159	space	96.97	A	0		Primates	anotation	TTCAACAAGGGTGTAGGATGGCCAGGGAAGCATGCTGGGCCTTGGCATTTCTATGTTAGTTGGAAG	chr4 - 136920915 136920981	space
mir-5004	GGCACTTGCTTGGGGGTTAGTGAGGACAGGGCAAATTCACGAGATTGGGTTGTGCAGAGGCTGACACTTGGATTTTCCTGGGCCTCAGGACTTCCTTTCAGACATGG	(((....))).(((((((..(((((.(((((.(((((((.(.(.((((.((......)).))))).).))))))))))))..))))).)))))))............	chr4 - 137328719 137328826	intron	100	0	-31.1	no		Primates	c		mir-5004	intron	100	A	0		Primates	anotation	GGCACTTGCTTGGGGGTTAGTGAGGACAGGGCAAATTCACGAGATTGGGTTGTGCAGAGGCTGACACTTGGATTTTCCTGGGCCTCAGGACTTCCTTTCAGACATGG	chr4 - 137328719 137328826	intron
mir-6834	GTGAGGGACTGGGATTTGTGGGGCGAGGAGGGACCTGTACTAGCCATGGTTCTGATCACGTATGTCCCATCCCTCCATCAG	(.((((((.((((((..(((.(..((...((((((............))))))..)).).)))))))))))))))).....	chr4 - 137495247 137495328	intron	98.77	0	-29.8	no		Primates	b, c		mir-6834	intron	98.77	A	0		Primates	anotation	GTGAGGGACTGGGATTTGTGGGGCGAGGAGGGACCTGTACTAGCCATGGTTCTGATCACGTATGTCCCATCCCTCCATCAG	chr4 - 137495247 137495328	intron
mir-6873	CCCAGGAGAGGGAATACAGAGGGCAATCAGGACTGGGTCATTCTCTCTGTCTCTCTCTTTCTCAG	...((((((((((...(((((((.(((...(((...)))))))))))))))))))))))......	chr4 + 137498283 137498348	intron	96.83	0	-22.5	no		Primates	b		mir-6873	intron	96.83	A	0		Primates		CCCAGGAGAGGGAATACAGAGGGCAATCAGGACTGGGTCATTCTCTCTGTCTCTCTCTTTCTCAG	chr4 + 137498283 137498348	intron
mir-219-1	CCGCCCCGGGCCGCGGCTCCTGATTGTCCAAACGCAATTCTCGAGTCTATGGCTCTGGCCGAGAGTTGAGTCTGGACGTCCCGAGCCGCCGCCCCCAAACCTCGAGGGGG	...((((((((.(((((((..(((.(((((.((.(((((((((.(((.........)))))))))))).)).))))))))..))))))).))))...........)))).	chr4 - 137580689 137580799	space	100	0	-56.6	yes	mir-219	Vertebrates	a, b		mir-219-1	space	100	A	4	mir-219	Vertebrata	Ref1	CCGCCCCGGGCCGCGGCTCCTGATTGTCCAAACGCAATTCTCGAGTCTATGGCTCTGGCCGAGAGTTGAGTCTGGACGTCCCGAGCCGCCGCCCCCAAACCTCGAGGGGG	chr4 - 137580689 137580799	space
mir-219c	GGACGTCCAGACTCAACTCTCGGCCAGAGCCATAGACTCGAGAATTGCGTTTGGACAATC	....((((((((.(((.(((((((....)))........)))).))).))))))))....	chr4 + 137580718 137580778	space	95	0	-21	no	mir-219	Vertebrates	b, c		mir-219c	space	95	A	0	mir-219	Vertebrata	anotation	GGACGTCCAGACTCAACTCTCGGCCAGAGCCATAGACTCGAGAATTGCGTTTGGACAATC	chr4 + 137580718 137580778	space
mir-6721	CCCTCATCTCTGGGCAGGGGCTTATTGTAGGAGTCTCAGAAGAGAGCTGTGGACTGACCTGCTTTACCCCTTCCCCAGGTTCCCATT	........((((((.(((((..((..(((((((((((((.......))).)))))..)))))..)))))))..))))))........	chr4 + 138725031 138725118	intron	97.7	0	-31.1	no		Primates	b, c		mir-6721	intron	97.7	A	0		Primates	anotation	CCCTCATCTCTGGGCAGGGGCTTATTGTAGGAGTCTCAGAAGAGAGCTGTGGACTGACCTGCTTTACCCCTTCCCCAGGTTCCCATT	chr4 + 138725031 138725118	intron
mir-1236	GTGAGTGACAGGGGAAATGGGGATGGACTGGAAGTGGGCAGCATGGGGCTGACCTTCATCATGGCCTGGTCAACATAATGCCTCTTCCCCTTATCACTCCAG	(.((((((.(((((((..((..(((((((((..(((((((((.....)))).)).....)))..)).))))..)))....))..)))))))..)))))))..	chr4 + 138896792 138896894	intron	95.1	0	-38.5	no	mir-1236	Primates	b, c		mir-1236	intron	95.1	A	0	mir-1236	Primates	anotation	GTGAGTGACAGGGGAAATGGGGATGGACTGGAAGTGGGCAGCATGGGGCTGACCTTCATCATGGCCTGGTCAACATAATGCCTCTTCCCCTTATCACTCCAG	chr4 + 138896792 138896894	intron
mir-4646	ACTGGGAAGAGGAGCTGAGGAACACTGCGGAGAGGGTCTCACATTGTCCCTCTCCCTTCCCAG	.((((((((.(((...((((.(((.((..((((...)))).)).))).)))))))))))))))	chr4 + 139170228 139170291	intron	96.83	0	-29.2	no		Mammals	b, c		mir-4646	intron	96.83	A	0		Mammalia	anotation	ACTGGGAAGAGGAGCTGAGGAACACTGCGGAGAGGGTCTCACATTGTCCCTCTCCCTTCCCAG	chr4 + 139170228 139170291	intron
mir-6891	GTAAGGAGGGGGATGAGGGGTCATGTCTCTTCTCAGGGGAAACAGGAGCCCTTCTGGAGCCCTTCAGCAGGGTCAGGGCCCCTCACCTTCCCCTCCTTTCCCAG	..((((((((((((((((((((.((.((((.((.(((((...(((((....)))))...))))).)).)))).)).)))))))))..)))))))))))......	chr4 + 139549796 139549900	intron	96.77	0	-57.4	no		Primates	b		mir-6891	intron	96.77	A	0		Primates		GTAAGGAGGGGGATGAGGGGTCATGTCTCTTCTCAGGGGAAACAGGAGCCCTTCTGGAGCCCTTCAGCAGGGTCAGGGCCCCTCACCTTCCCCTCCTTTCCCAG	chr4 + 139549796 139549900	intron
mir-6891	GTAAGGAGGGGGATGAGGGGTCATGTCTCTTCTCAGGGAAAGCAGGAGCCCTTCTGGAGCCCTTCAGCAGGGTCAGGGCCCCTCATCTTCCCCTCCTTTCCCAG	..((((((((((((((((((((.((.((((.((.((((....(((((....)))))...))))..)).)))).)).)))))))))))..)))))))))......	chr4 + 139568418 139568522	intron	98.92	0	-56	no		Primates	b, c		mir-6891	intron	98.92	A	0		Primates	anotation	GTAAGGAGGGGGATGAGGGGTCATGTCTCTTCTCAGGGAAAGCAGGAGCCCTTCTGGAGCCCTTCAGCAGGGTCAGGGCCCCTCATCTTCCCCTCCTTTCCCAG	chr4 + 139568418 139568522	intron
mir-4640	CTGTGGGCTGGGCCAGGGAGCAGCTGGTGGCTGGGAAGTAAGATCTGACCTGGACCCCTTCCCACACACCCCGTTTCCTGGCCCACAGGT	((((.....((((((((((((....((((..(((((((...(.(((.....))).).)))))))..))))..))))))))))))))))..	chr4 - 140078553 140078643	intron	93.33	0	-43.5	no		Primates	b		mir-4640	intron	93.33	A	0		Primates		CTGTGGGCTGGGCCAGGGAGCAGCTGGTGGCTGGGAAGTAAGATCTGACCTGGACCCCTTCCCACACACCCCGTTTCCTGGCCCACAG	chr4 - 140078553 140078643	intron
mir-877	GCTAGAGAAGGTAGAGGAGATGGCGCAGGGGACACGGGCTAAGACTCGGGGGTTCCTGGGACCCTCAGACATGTGTCCTCTTCTCCCTCCTCCCAGGTGTATG	.........((..((((((..((.(.((((((((((((......)))((((((((...))))))))......))))))))).).)))))))))).........	chr4 - 140380843 140380946	intron	100	0	-38.5	yes	mir-877	Mammals	a, b		mir-877	intron	100	A	1	mir-877	Mammalia	Ref1	GCTAGAGAAGGTAGAGGAGATGGCGCAGGGGACACGGGCTAAGACTCGGGGGTTCCTGGGACCCTCAGACATGTGTCCTCTTCTCCCTCCTCCCAGGTGTATG	chr4 - 140380843 140380946	intron
mir-548a	TCCAGGGAGGTATTAAGTTGGTGCAAAAGTAATTGTGGTTTTTTGCCATTAAAAGTAATGACAATACTGGCAATTACTTTTCCTCCAAACCTGATATT	........(((((((.(((((.(.((((((((((((.(....(((.(((((....))))).)))...).)))))))))))).).)).))).)))))))	chr4 - 152063965 152064063	space	100	0	-24.4	no	mir-548	Primates	a, b		mir-548a	space	100	A	0	mir-548	Primates	Ref1	TCCAGGGAGGTATTAAGTTGGTGCAAAAGTAATTGTGGTTTTTTGCCATTAAAAGTAATGACAATACTGGCAATTACTTTTCCTCCAAACCTGATATT	chr4 - 152063965 152064063	space
mir-4639	TTGCTACGTAGGCTGAGATTGATGTCAGGTTATCCCCAAGCGTAACCTCACTCTCACCTTGCTCTGCAG	.(((...(((((.(((((.(((.....((((((........))))))))).))))).)))))...))).	chr4 - 154604943 154605012	intron	95.65	1	-20.4	no		Primates	b, c		mir-4639	intron	95.65	B	0		Primates	anotation	TTGCTACGTAGGCTGAGATTGATGTCAGGTTATCCCCAAGCGTAACCTCACTCTCACCTTGCTCTGCAG	chr4 - 154604943 154605012	intron
mir-762-1	GCCCGGCTCCGGGTCTCGGCCCTTACGGTCCGGCCGGCCATGCTGGCGGGGCTGGGGCCAGAGCCGAGCCC	....(((((.((.(((.(((((...((((((.((((((...)))))).)))))))))))))).))))))).	chr4 - 162822587 162822658	intron	97.18	1	-48.9	no	mir-762	Vertebrates	a, b		mir-762-1	intron	97.18	B	0	mir-762	Vertebrata	Ref1	GCCCGGCTCCGGGTCTCGGCCCTTACGGTCCGGCCGGCCATGCTGGCGGGGCTGGGGCCAGAGCCGAGCCC	chr4 - 162822587 162822658	intron
mir-5683	GGAGCTTGTTACAGACGCAGGGTCTCTGACTTCTTACTGCACCACTGAAGTCAGCATCTGCATTTGAATAAGATCCC	(((.((((((.((((.(((((....((((((((.............))))))))..))))).)))))))))).))).	chr4 - 164820342 164820419	space	93.42	3	-28.7	no		Primates	b		mir-5683	space	93.42	C	0		Primates		GGAGCTTGTTACAGACGCAGGGTCTCTGACTTCTTACTGCACCACTGAAGTCAGCATCTGCATTTGAATAAGATCCC	chr4 - 164820342 164820419	space
mir-3691	TTGAGGCACTGGGTAGTGGATGATGGAGACTCGGTACCCACTGCAGAGGGTGGGGACCAAGTCTGCATCATCCACTCCTCAGTGCCTCAG	.((((((((((((.(((((((((((.(((((.(((.((((((......)))))).))).))))).))))))))))).)))))))))))).	chr4 + 165841216 165841306	intron	95.56	0	-67.6	yes		Primates	b, c		mir-3691	intron	95.56	A	1		Primates	anotation	TTGAGGCACTGGGTAGTGGATGATGGAGACTCGGTACCCACTGCAGAGGGTGGGGACCAAGTCTGCATCATCCACTCCTCAGTGCCTCAG	chr4 + 165841216 165841306	intron
mir-703	TAAAACCTTCAGAAGGAAAGGAGAATCTTTTGTGGACCACTTTGGTTTTCTTTTTTGCGTGTGGCAGTTTTA	((((((((.((...(((((((((((((....(((...)))...)))))))))))))...)).))..))))))	chr4 - 168020266 168020338	space	98.44	0	-16.8	no	mir-703	Vertebrates	b		mir-703	space	98.44	A	0	mir-703	Vertebrata		TAAAACCTTCAGAAGGAAAGGAGAATCTTTTGTGGACCACTTTGGTTTTCTTTTTTGCGTGTGGCAGTTTTA	chr4 - 168020266 168020338	space
mir-6720	TTGAGCGAGAGGTTGTGGCGCACGGAGTTCTTCCAGCCCTGGTAGGCGCCGCGGAAGAAGGGGAAGCGCGCCTGCAGGAACTGGTAGATCTCGCTGAG	.(.(((((((..(((((...)))))...(((.((((.((((.(((((((.((.............)))))))))))))..)))).)))))))))).).	chr4 + 169671722 169671820	space	97.96	0	-38.9	no		Primates	b, c		mir-6720	space	97.96	A	0		Primates	anotation	TTGAGCGAGAGGTTGTGGCGCACGGAGTTCTTCCAGCCCTGGTAGGCGCCGCGGAAGAAGGGGAAGCGCGCCTGCAGGAACTGGTAGATCTCGCTGAG	chr4 + 169671722 169671820	space
mir-6891	GTAAGGAGGGGGATGAGGGGTCATGTCTCTTCTCAGGGAAAGCAGGAGCCCTTCTGGAGCCCTTCAGCAGAGTCAGGGCCCCTCATCTTCCCCTCCTTTCCCAG	..((((((((((((((((((((.((.((((.((.((((....(((((....)))))...))))..)).)))).)).)))))))))))..)))))))))......	chr4_KE145585_random + 30686 30790	intron	97.85	0	-56.9	no		Primates	b		mir-6891	intron	97.85	A	0		Primates		GTAAGGAGGGGGATGAGGGGTCATGTCTCTTCTCAGGGAAAGCAGGAGCCCTTCTGGAGCCCTTCAGCAGAGTCAGGGCCCCTCATCTTCCCCTCCTTTCCCAG	chr4_KE145585_random + 30686 30790	intron
mir-6891	GTAAGGAGGGGGATGAGGGGTCATGTCTCTTCTCAAGGAAAGCAGGAGCCCTTCTGGAGCCCTTCAGCAGGGTCAGGGCCCCTCATCTTCCCCTCCTTTCCCAG	..((((((((((((((((((((.((.((((.((.((((....(((((....)))))....)))).)).)))).)).)))))))))))..)))))))))......	chr4_KE145593_random + 24584 24688	intron	97.85	0	-55	no		Primates	b		mir-6891	intron	97.85	A	0		Primates		GTAAGGAGGGGGATGAGGGGTCATGTCTCTTCTCAAGGAAAGCAGGAGCCCTTCTGGAGCCCTTCAGCAGGGTCAGGGCCCCTCATCTTCCCCTCCTTTCCCAG	chr4_KE145593_random + 24584 24688	intron
mir-6891	GTAAGAAGGGGGATGAGGGGTCATGTCTCTTCTCAGGGAAAGCAGGAGCCCTTCTGGATCAGGGTCAGGGCCCCTCACCTTCCCCTCCTTTCCCAG	..(((.((((((((((((((((.((.((((..((.((((..((....))..)))).))..)))).)).)))))))))..))))))).)))......	chr4_KE145599_random + 14066 14162	intron	95.7	1	-41.5	no		Primates	b		mir-6891	intron	95.7	B	0		Primates		GTAAGAAGGGGGATGAGGGGTCATGTCTCTTCTCAGGGAAAGCAGGAGCCCTTCTGGATCAGGGTCAGGGCCCCTCACCTTCCCCTCCTTTCCCAG	chr4_KE145599_random + 14066 14162	intron
mir-6891	GTAAGAAGGGGGATGAGGGGTCATGTCTCTTCTCAGGGAAAGCAGGAGCCCTTCTGGAGCCCTTCAGCAGGGTCAGGGCCCCTCACCTTCCCCTCCTTTCCCAG	..(((.((((((((((((((((.((.((((.((.((((....(((((....)))))...))))..)).)))).)).)))))))))..))))))).)))......	chr4_KE145600_random + 5060 5164	intron	96.77	1	-47.4	no		Primates	b		mir-6891	intron	96.77	B	0		Primates		GTAAGAAGGGGGATGAGGGGTCATGTCTCTTCTCAGGGAAAGCAGGAGCCCTTCTGGAGCCCTTCAGCAGGGTCAGGGCCCCTCACCTTCCCCTCCTTTCCCAG	chr4_KE145600_random + 5060 5164	intron
mir-6891	CTGAGATGGGGTAAGAAGGGGGATGAGGGGTCATGTCTCTTCTCAGGGAAAGCAGGAGCCCTTCTGGAGCCCTTCAGCAGGGTCAGGGCGCTTCACCTTCCCCTCCTTTCCCAGAGCCATCTTC	..(((((((((.(((.((((((((((((.(((.((.((((.((.((((....(((((....)))))...))))..)).)))).)).))).)))))..))))))).))).)).....))))))).	chr4_KE145600_random + 24049 24173	intron	94.62	1	-50.7	no		Primates	b		mir-6891	intron	94.62	B	0		Primates		GTAAGAAGGGGGATGAGGGGTCATGTCTCTTCTCAGGGAAAGCAGGAGCCCTTCTGGAGCCCTTCAGCAGGGTCAGGGCGCTTCACCTTCCCCTCCTTTCCCAG	chr4_KE145600_random + 24059 24163	intron
mir-571	GGAACTGCTTCATAATCCTCAGTAAGGCCAACCTCCATGCACCATTTTCTTGTCTGTAGCCATGTCTGTGGGCTGTGGAGTTGGCCACCTGGGTGAGGGCCTGCTTTTTC	((((..((.......(((((((...(((((((.(((((((.((((...(.((........)).)...)))))).))))))))))))..))))).))......))..))))	chr5 - 419776 419886	intron	100	0	-36	no	mir-571	Primates	a		mir-571	intron	100	A	0	mir-571	Primates	Ref1	GGAACTGCTTCATAATCCTCAGTAAGGCCAACCTCCATGCACCATTTTCTTGTCTGTAGCCATGTCTGTGGGCTGTGGAGTTGGCCACCTGGGTGAGGGCCTGCTTTTTC	chr5 - 419776 419886	intron
mir-4800	GGAGAAAGGAGTGGACCGAGGAAGGAAGGAAGGCAAGGCTGTCTGTCCATCCGTCCGTCTGTCCACCTACCTGTCAGTCC	(((((.(((.((((((.(((((.(((.((((((((....))))).))).))).))).)).))))))...))).))..)))	chr5 - 2295605 2295685	space	100	0	-33.3	no		Primates	b, c		mir-4800	space	100	A	0		Primates	anotation	GGAGAAAGGAGTGGACCGAGGAAGGAAGGAAGGCAAGGCTGTCTGTCCATCCGTCCGTCTGTCCACCTACCTGTCAGTCC	chr5 - 2295605 2295685	space
mir-7189	CCGTGCTGCCAGAGCGCATGACGGAGCCCTCTTGGTCATGTTCTCTCGCAGCTCTGGA	(((.(((((.((((.(((((((.(((....))).))))))).)))).)))))..))).	chr5 - 4664843 4664901	intron	100	0	-30.9	yes		Cercopithecidae	a, b		mir-7189	intron	100	A	1		Cercopithecidae	Ref1	CCGTGCTGCCAGAGCGCATGACGGAGCCCTCTTGGTCATGTTCTCTCGCAGCTCTGGA	chr5 - 4664843 4664901	intron
mir-95	AACACAGTGGGCACTCAATAAATGTCTGTTGAATTGAAATGCGTTACATTCAACGGGTATTTATTGAGCACCCACTCTGTG	.(((.((((((..((((((((((((((((((((((((......))).)))))))))))))))))))))..)))))).))).	chr5 + 4864815 4864896	intron	100	0	-36.4	yes	mir-95	Mammals	a, b		mir-95	intron	100	A	1	mir-95	Mammalia	Ref1	AACACAGTGGGCACTCAATAAATGTCTGTTGAATTGAAATGCGTTACATTCAACGGGTATTTATTGAGCACCCACTCTGTG	chr5 + 4864815 4864896	intron
mir-7689	CCGAGGCAGCCTGGCTTAGTGGAAAGGGAATGGGCTTTAGAGCCAGACTGCCTGGGTTT	((.((((((.(((((((.....((((........)))).))))))).)))))).))...	chr5 + 5607413 5607472	space	94.92	0	-26.9	no		Mammals	b		mir-7689	space	94.92	A	0		Mammalia		CCGAGGCAGCCTGGCTTAGTGGAAAGGGAATGGGCTTTAGAGCCAGACTGCCTGGGTTT	chr5 + 5607413 5607472	space
mir-4798	AAGTACGACTTCAGTATACTTTGCGAATTGGCTTTTACGAAAGACCAACTCACGAAGTATACCGAAGTCGTACTT	((((((((((((.((((((((((.((.((((((((....)))).)))).)).)))))))))).))))))))))))	chr5 - 5621722 5621797	intron	93.33	0	-39.2	no	mir-4798	Primates	b, c		mir-4798	intron	93.33	A	0	mir-4798	Primates	anotation	AAGTACGACTTCAGTATACTTTGCGAATTGGCTTTTACGAAAGACCAACTCACGAAGTATACCGAAGTCGTACTT	chr5 - 5621722 5621797	intron
mir-378d	GCACTTGGCCCAGAGTTCACACTCAGGGCTCATTGCTGCCATTGTTTCTGTCTTCGTTCCTGTTGTTATTACTGGACTTGGAGTCAGAAGCAGGTTCGAATCCCAACTCCAC	(((...(((((.((((....)))).)))))...))).(((..((((((((.(((((.(((.((.......)).)))..))))).))))))))))).................	chr5 + 7047326 7047438	space	100	0	-37.2	yes	mir-378	Mammals	a, b		mir-378d	space	100	A	1	mir-378	Mammalia	Ref1	GCACTTGGCCCAGAGTTCACACTCAGGGCTCATTGCTGCCATTGTTTCTGTCTTCGTTCCTGTTGTTATTACTGGACTTGGAGTCAGAAGCAGGTTCGAATCCCAACTCCAC	chr5 + 7047326 7047438	space
mir-218b	TGTAGAAAGCTGCGTGACGTTCCATGGTGCTTGACGGAACCATGTTTTACTCATACCTCGCAACCACATGGTTAGATCAAGCACAACAGAAAATCTCGCTACATTGTCACTACA	(((((((.(..(((.((..(((....((((((((...((((((((....................))))))))...))))))))....)))..)).)))..).))....)))))	chr5 - 19686301 19686415	space	97.37	0	-30	no	mir-218	Vertebrates	b, c		mir-218b	space	97.37	A	0	mir-218	Vertebrata	anotation	TGTAGAAAGCTGCGTGACGTTCCATGGTGCTTGACGGAACCATGTTTTACTCATACCTCGCAACCACATGGTTAGATCAAGCACAACAGAAAATCTCGCTACATTGTCACTACA	chr5 - 19686301 19686415	space
mir-218-1	AATGTAGCGAGATTTTCTGTTGTGCTTGATCTAACCATGTGGTTGCGAGGTATGAGTAAAACATGGTTCCGTCAAGCACCATGGAACGTCACGCAGCTTTCTACA	......(((.(((.((((((.(((((((((..((((((((..((((.........)))).))))))))..))))))))).)))))).))).)))...........	chr5 + 19686310 19686415	intron	100	0	-39.3	no	mir-218	Vertebrates	a, b		mir-218-1	intron	100	A	0	mir-218	Vertebrata	Ref1	AATGTAGCGAGATTTTCTGTTGTGCTTGATCTAACCATGTGGTTGCGAGGTATGAGTAAAACATGGTTCCGTCAAGCACCATGGAACGTCACGCAGCTTTCTACA	chr5 + 19686310 19686415	intron
mir-7978	GCTGGTGTATAGTGTTGCTCAAGTCCTCTATTTCTTTGAACATCAGTATACACCAACTA	..(((((((((.((.((.(((((...........))))).)).)).)))))))))....	chr5 - 20627712 20627771	intron	93.22	1	-18.7	no		Primates	b		mir-7978	intron	93.22	B	0		Primates		GCTGGTGTATAGTGTTGCTCAAGTCCTCTATTTCTTTGAACATCAGTATACACCAACTA	chr5 - 20627712 20627771	intron
mir-12115	AAACTAGTGGAGCTGAGAGGCAGCTCAGACGCAGATTCGCTTGCCTTTCCCTGAACTGCACCCATGCCAAGCAC	......((...((((.(..((((.((((..((((......))))......)))).))))..))).))...))..	chr5 + 21696577 21696651	intron	95.95	2	-16.1	no		Primates	b, c		mir-12115	intron	95.95	C	0		Primates	anotation	AAACTAGTGGAGCTGAGAGGCAGCTCAGACGCAGATTCGCTTGCCTTTCCCTGAACTGCACCCATGCCAAGCAC	chr5 + 21696577 21696651	intron
mir-573	TTTAGAGGTGTCTCCCTGAAGTGATGCATAACCGATCAGGATCTACTCATGTCAACTTTGGTAAAGTTATGTTGCTTGTCAGGGTGAGGAGAGGTTTTG	........(.((.((((((...(..(((((((..((((((....((....))....))))))...)))))))..)...)))))).)).)..........	chr5 - 23701026 23701125	space	100	0	-23.1	no	mir-573	Primates	a		mir-573	space	100	A	0	mir-573	Primates	Ref1 Ref2	TTTAGAGGTGTCTCCCTGAAGTGATGCATAACCGATCAGGATCTACTCATGTCAACTTTGGTAAAGTTATGTTGCTTGTCAGGGTGAGGAGAGGTTTTG	chr5 - 23701026 23701125	space
mir-762-1	GGCCCGGCTCCGGGTCTCGGCCCGTACGGTCCGGCCGGCCATGCTGGCGGGGCTGGGGCTGGAGCCGAGCCCGCGGCGGGGCC	(((((.(((.((((.((((((((((.((((((.((((((...)))))).))))))..)).)).)))))))))).))).)))))	chr5 - 26312053 26312136	space	96.39	2	-63.6	no	mir-762	Vertebrates	a, b		mir-762-1	space	96.39	C	0	mir-762	Vertebrata	Ref1	GGCCCGGCTCCGGGTCTCGGCCCGTACGGTCCGGCCGGCCATGCTGGCGGGGCTGGGGCTGGAGCCGAGCCCGCGGCGGGGCC	chr5 - 26312053 26312136	space
mir-4275	ACATTTCCGTCCAATTACCACTTCTTTTTTGTCACCTGAGCACAGTCAGCAGTCAGCATAAAAAGTGATAATGGGAAGATAATGTCTA	(((((..(.(((.((((.(((((.....(((.(..((((......))))..).)))......))))).)))).))).)..)))))...	chr5 + 28163469 28163557	space	94.25	0	-17.5	no		Primates	b, c		mir-4275	space	94.25	A	0		Primates	anotation	ACATTTCCGTCCAATTACCACTTCTTTTTTGTCACCTGAGCACAGTCAGCAGTCAGCATAAAAAGTGATAATGGGAAGATAATGTCT	chr5 + 28163469 28163557	space
[truncated: 501 more rows]
