# Supplementary material for: Analysis of conserved miRNAs in cynomolgus macaque genome using small RNA sequencing and homology searching
Source: PeerJ. 2020 Jul 10;8:e9347. doi: 10.7717/peerj.9347 (PMC7357559; doi:10.7717/peerj.9347)
Supplement: Supplemental Information 2 — Average expression levels for each mature miRNA were normalized by transcripts per million; MFE: minimal folding free energy. [file peerj-08-9347-s002.xlsx]

## Sheet: Supplemental Table S2
Supplemental Table S2: 136 potentially novel mature miRNAs
pre-miRNA ID	gene locations	Stem-loop sequences	structures	MFE (kcal/mol)	Mature sequences (5p)	Mature sequences (3p)	Average expression level		Accession numbers
							5p	3p
novel_mir1	chr1 + 2077852 2077933	CATATATACACATACACACACACACATATATATATACACATATATATATGTATGTATGTGTGTGTGTGGAGTGTGTGTATAT	.((((((((((((.((((((((((((((((((((((..........))))))))))))))))))))))..))))))))))))	-44.4		TATGTATGTGTGTGTGTGGAGT		3.86674	LR777949
novel_mir2	chr1 + 51339970 51340048	TCTTTTTCTTCTTCCTGCCTGTTCATAAATATTATGAACAGGCAGTATATTTATGAACAGGCAGGAAGAAGAAGATGGT	((.(((((((((((((((((((((((((((((..((......))..))))))))))))))))))))))))))))).)).	-45.7	TTCCTGCCTGTTCATAAATATT	ATTTATGAACAGGCAGGAAGA	1.6914	6.41528	LR777950
novel_mir3	chr1 + 73111239 73111318	TTAGATTGATGTCAACATAATTGTGGGTTTTGCCATTACTTTTAACAGCAAAAACTGTGATTACTTTTGCATCAACCTAT	.(((.(((((((.((..((((..(((.((((((..(((....)))..)))))).)))..))))..)).))))))).))).	-20.5		CAAAAACTGTGATTACTTTTGC		11.1608	LR777952
novel_mir4	chr1 - 25597575 25597657	ATGCCTGGATACAGCTCCGTGATTTCTCTAAAGTACAAATTTATTGCCCCTTTAGAGAAGTCATGAAGCTTTGCCGGCAAGCA	.((((.((.((.((((.((((((((((((((((..(((.....)))...)))))))))))))))).)))).))))))))....	-35.6	ACAGCTCCGTGATTTCTCTAAA	TTTAGAGAAGTCATGAAGCTTTG	5.71224	0.0859082	LR777953
novel_mir5	chr1 - 32288680 32288757	CTAGGTTAGTGCAAAAGTAATCAGTTTTTGCTATTGAAAGTAATGGCAAAAACTGTGATTACTTTTGCACCAATCTAA	.((((((.((((((((((((((((((((((((((((....)))))))))))))..))))))))))))))).)))))).	-39.9		CAAAAACTGTGATTACTTTTGC		11.1608	LR777955
novel_mir6	chr1 - 51339969 51340047	CATCTTCTTCTTCCTGCCTGTTCATAAATATACTGCCTGTTCATAATATTTATGAACAGGCAGGAAGAAGAAAAAGAAA	....(((((((((((((((((((((((((((..((......))..)))))))))))))))))))))))))))......	-42.3	TTCCTGCCTGTTCATAAATAT	ATTTATGAACAGGCAGGAAGA	0.966686	7.73349	LR777956
novel_mir7	chr1 - 55888188 55888268	TTTAGGTTGGTGCAAATATAATTGCGGTTTTGCTGTTTTTTTAAATGGCAAAAACTGCGGTTAATTTTGCACCAACCTAAT	.(((((((((((((((..((((((((((((((((((((....))))))).)))))))))))))..))))))))))))))).	-44.5		CAAAAACTGCGGTTAATTTTGC		5.53647	LR777958
novel_mir8	chr1 - 63167807 63167890	AGTTGCTAGCAACAGTACCTAAGCTCAGAAAGGTCTAAGACCCTATGCTTTCTGAGCTTAGCTACTGTTTCTAGAATTTGTTGT	.....((((.(((((((.(((((((((((((((((...))))......))))))))))))).))))))).)))).......	-35.4	AACAGTACCTAAGCTCAGAAAG	TTCTGAGCTTAGCTACTGTTTC	1.55077	6.15164	LR777959
novel_mir9	chr1 - 174465223 174465303	TTTATATGGCACCTATAATAATCTGACATATATCTGACACATACATATATGTCAGATAATTATAGGTGCCATATAACATAT	.((((((((((((((((((.(((((((((((((...........))))))))))))).))))))))))))))))))...	-42.2	ACCTATAATAATCTGACATATA	TATGTCAGATAATTATAGGTGC	0.265919	8.34865	LR777961
novel_mir10	chr1 - 206866401 206866483	CGGTATGAAGTTGAGTCAGAATGTATCTTAAGTGTTTAGTGCCTGACACACATTTAAGATACATTCTGACTCAACTTCATACC	.((((((((((((((((((((((((((((((((((...(((.....)))))))))))))))))))))))))))))))))))))	-55.3	AGTCAGAATGTATCTTAAGTGT	ATTTAAGATACATTCTGACTCA	35.5851	23.0912	LR777963
novel_mir11	chr1 - 226139438 226139512	GCCGCCTGGCACTGCTGCCCTGATAGTCGGCTCTGAGTTGGAGGCCAGCTTCCATGGCAGCATCGTCAGTGGGCG	(((..(((((..(((((((.((..(((.((((((.....))).))).)))..)).)))))))..)))))..))).	-38.5	ACTGCTGCCCTGATAGTCGG		12.0396		LR777965
novel_mir12	chr10 - 15611832 15611916	GGTTAGACAAATAGACCAACAGAACTTACACTGTTTGTTTCTGGATTCTCTGTTTTGTTCCGTTGGTCTATTTGCCTGGCCTTG	((((((.(((((((((((((.((((..(((..(...(((....))).)..)))...)))).))))))))))))).))))))...	-34.3	ATAGACCAACAGAACTTACACTG	TTTTGTTCCGTTGGTCTATTTG	1.40609	0.343633	LR777966
novel_mir13	chr10 - 25185174 25185250	CTAGGTTGGTGCAGAAGCGATTACGGTTTTTGGAGTTTTAATTTGCAAAAACTGCAATTACTTCTGCGCCAACCTAA	.((((((((((((((((..(((.(((((((((.((.......)).))))))))).)))..)))))))))))))))).	-42.5		CAAAAACTGCAATTACTTCTGC		3.25158	LR777968
novel_mir14	chr10 - 27688246 27688327	GTGTCACCCCCATCTCCCCAGTTATGACAACCAAAAATGCCTCTAATTTTTTATTGTCACAACTGGGGAAATGGGGGTGATA	.((((((((((((.(((((((((.((((((..((((((.......))))))..)))))).))))))))).))))))))))))	-48.8	CTCCCCAGTTATGACAACCAAA	TTATTGTCACAACTGGGGAAAT	0.0864009	6.94256	LR777969
novel_mir15	chr11 + 13017906 13017985	GGGAGCAGTCTTCATCTGTAAAAGGAGCGGGGTGCTCAGGACCCTTGTACCTCGTTCTTTTACAGCTGAAGATTGCTTC	.(((((((((((((.(((((((((.((((((((((..((....)).))))))))))))))))))).)))))))))))))	-47.3	ATCTGTAAAAGGAGCGGGGTGCT	TACCTCGTTCTTTTACAGCTGA	0.172802	1.75761	LR777971
novel_mir16	chr11 + 108303982 108304066	AGGAAGAGTCAAGTCAAGGCCACAGGTCCTACAACAGGGCTGGAAAGCATACCTGTGGGACCTCTGGCCTTGGCTTGACTCTTTC	.(((((((((((((((((((((.((((((((((.....(((....))).....)))))))))).)))))))))))))))))))))	-59.6		TGTGGGACCTCTGGCCTTGGCT		23.0177	LR777973
novel_mir17	chr11 + 111097073 111097152	GTACACTGCTTAACTCTAGAGGGCACTAGTCATTGTGAAGTCTATGTGAATGGCGCCCTCTAGAAGTAAGCAGTGCATAA	...(((((((((..((((((((((.(((.((((...(....)...)))).))).))))))))))..))))))))).....	-41	TAACTCTAGAGGGCACTAGTC	AATGGCGCCCTCTAGAAGTAAG	0.263642	11.5124	LR777974
novel_mir18	chr11 - 7275156 7275243	CCGACCCGGGGGCCATCTTTACCAGACAGTGTTAGGAGCTTCACAATTAGACCATCCAACACTGTACTGGAAGATGGACCCAGGGCCG	.((.(((.(((.(((((((..((((((((((((.(((...((.......))...))))))))))).))))))))))).))).))).))	-42.9		CAACACTGTACTGGAAGATGGA		4.70649	LR777976
novel_mir19	chr12 + 20496005 20496076	GGCCCATGGAGCATGAGTGAGTGAGGGCCCGCTCACCGCCTTGGGACCTCACTCACTCACGCCCTATGGGAT	..(((((((.((.(((((((((((((.(((((.....))...))).))))))))))))).)).)))))))..	-45.9		TTGGGACCTCACTCACTCACGC		4.74555	LR777977
novel_mir20	chr12 + 108340960 108341048	CAGGCTTCCAGGGGCCAGGGCTGGGAATGAACATGGATATCTGGGGCAAAAGACATGATCATCCTGGCTCTATCCCTAGGCATTCCCTA	.(((...((.((((..(((((..(((.(((.((((....(((........))))))).))))))..)))))..)))).)).....))).	-32.8		ATCATCCTGGCTCTATCCCTAG		3.42734	LR777978
novel_mir21	chr12 - 7690802 7690879	TTGGTTGGTGCAAAAGTAATCGTGGTTTTTGCCATAAAAGTAATAGCAAAAACTGTGATTACTTTTGCACGAACCTAA	..((((.(((((((((((((((..((((((((.((.......)).))))))))..))))))))))))))).))))...	-41.5	CAAAAGTAATCGTGGTTTTTGC	CAAAAACTGTGATTACTTTTGC	3.51522	11.1608	LR777979
novel_mir22	chr12 - 95384373 95384448	TGCTAAGTATTGTGGGAAATATTTGCTGAGTGCACATAGCAAGCACTCAGCGAATATTTCCCACAATACTTAGCAC	(((((((((((((((((((((((((((((((((.........))))))))))))))))))))))))))))))))).	-56.6	TGTGGGAAATATTTGCTGAGT		6.23952		LR777981
novel_mir23	chr12 - 97568890 97568967	CCTCAAAACAACACACATACTACAATCTCTGTTAACTTGGGTTATCAGAGATTGTAGTATGTGTGTTGTTTTGTGAAT	.(.((((((((((((((((((((((((((((.((((....)))).)))))))))))))))))))))))))))).)...	-49.6	ACACACATACTACAATCTCTGT	AGAGATTGTAGTATGTGTGTTG	2.57386	2.35325	LR777982
novel_mir24	chr12 - 126879880 126879979	TGTGTATGTGTGAGTGTGTGTGTGTGAGTGTTTAAGGAGGGTACAATATGCCCAAAGAAAGCCCCACGTGCCCGCAGGCCCATTGATAATCCAATACCCC	..(((..(((.(..((((.(..((((.(.((((.....(((((.....))))).....))))).))))..).))))..).)))..)))............	-22.5	TGAGTGTGTGTGTGTGAGTGTTT		3.69098		LR777984
novel_mir25	chr13 + 45049314 45049392	TATTAGGTTGGAGCAAAAGTAATTGCAGTTTTTGCCATTAGAATAGCAAACACTGCAATTACTTTTGTACCAACCTAAT	.((((((((((.(((((((((((((((((.(((((.((....)).))))).))))))))))))))))).))))))))))	-43.8		AAACACTGCAATTACTTTTGT		12.0396	LR777985
novel_mir26	chr13 - 35046774 35046855	TCCCTGGGCATCCTGGGCTTTGGCAGACAGCTCTTTGCCTCTCATACAGCTGTTGAGCTGAGCCCAGGGTGCCCTGGGTTCT	.(((.(((((((((((((.(..((.(((((((...((.....))...)))))))..))..)))))))))))))).)))....	-50.3	TCCTGGGCTTTGGCAGACAGCT	CTGTTGAGCTGAGCCCAGGGTGC	5.36834	0.351522	LR777986
novel_mir27	chr13 - 41163401 41163486	TTGTGAGCAAGGGGGAAGGAAGAGCCTAGAATGAATTGCCATATTCTTTCATTCTTTTCTTTCCTTCCCTGTAGCCTTGAGAAGAG	......((.(.(((((((((((((...((((((((............)))))))).))).)))))))))).).)).........	-28.6	GGGGGAAGGAAGAGCCTAGAATG	TTCTTTTCTTTCCTTCCCTGTAG	0.615164	32.2522	LR777988
novel_mir28	chr13 - 49879655 49879752	TTTTTACAGTGAAACTGTACTGATAAATTATTTGCTCTGTGTGTGTGTGTGTGTGTGTGTGTGTGTGTGAGTGTGTGTGTGTGAGTGCATGTAGGTTT	..((((((.......((((((.(((...(((.(((((((..((..((..(....)..))..))..)).))))).)))..))).))))))))))))...	-18.41		TGAGTGTGTGTGTGTGAGTGC		9.31534	LR777990
novel_mir29	chr13 - 61919968 61920035	TTTTGTGAGACCAAGTCTTACTCTGTCACCTAGGCTAGAGTGCAGTAGCGAGATCTCGGCTCACTTTA	....(((((.((.(((((..(((((.((((((...))).)))))).))..))).)).)))))))....	-23.2	CCAAGTCTTACTCTGTCACC		1.84549		LR777991
novel_mir30	chr13 - 103219090 103219180	TAGGTTGGTGCAAAAGTAATCGTGGTTTTTGTCATTACTTTTTTTAGAAAACAAAACGGTAAAAACTGCAATTACTTTTGCACCAACCTAA	((((((((((((((((((((.(..((((((..(......((((....))))......)..))))))..).)))))))))))))))))))).	-41.1	CAAAAGTAATCGTGGTTTTTGT		12.1339		LR777992
novel_mir31	chr14 + 9822916 9823003	GTCTGTGTGAGTGGGGGGCCACGAGGCATGTGAGTGTCCAGCAAAGGGCTCACTACTCCTGTCCCCCCAGCCCTACCTACAGTGGAA	....(((.(..(((((((.((.(((....((((((..((......))))))))..))).)).)))))))..).)))..	-31.7	TGGGGGGCCACGAGGCATGTGAGT	TCACTACTCCTGTCCCCCC	4.70649	0.861538	LR777993
novel_mir32	chr14 + 33105196 33105278	GGACCTGCCCCTTTATGATAAAGCCAAAAGAGGCCCCGCTAAGCTTTGGGGTCTCTTCTGACTTTATCATAAAGGGGCAGGTC	.((((((((((((((((((((((.((.(((((((((((........))))))))))).)).))))))))))))))))))))))	-59.9	TTATGATAAAGCCAAAAGAGG	TCTCTTCTGACTTTATCATAAA	0.0864009	6.50316	LR777995
novel_mir33	chr14 + 71756362 71756443	TCTGGCTGGCTGTCCGCTGGCTTACTCTCTCTCCGTTGTCCTCTCCGCTGGGGAGGGAGTGAGGCGTGGGTGCCAGCCGGGA	((((((((((...((((.(.(((((((((((((((.((.......)).))))))))))))))).)))))..)))))))))).	-51.5	TGTCCGCTGGCTTACTCTCTCT		30.2245		LR777997
novel_mir34	chr14 - 73154936 73155025	TGTTGGGTGAACCACTATCGTTTTATCAGCTATTACAGACTTTCTGCCTGTTTCAAATAGCTGATAAGACGATAGTGGCTCAGCCAACAA	((((((.(((.(((((((((((((((((((((((((((.(.....).))))....))))))))))))))))))))))).))).)))))).	-52.8	ACCACTATCGTTTTATCAGCT	TAGCTGATAAGACGATAGTGGC	3.07582	1.23033	LR777998
novel_mir35	chr14 - 102823082 102823148	TTTTTTGAGACCAAGTCTTACTCTGTCACCAGGCTAGAGTACAGTGGCGTGATCTTGGCTCACTGCA	.....((((.(((((..((((...(((((...((....))...))))))))).))))))))).....	-18.9	CCAAGTCTTACTCTGTCACCA		2.81218		LR778000
novel_mir36	chr15 + 9335536 9335621	ACAGGGCTCCTAGGAAATGGGTCCCTGATGTGTCTGAGACCTGCACACAGGAATTGCCCATCTCCTCTGCAACCCGTGGGAACTGG	.(((.((....((((.((((((.((((.(((((..(....).)))))))))....)))))).))))..))..((....))..))).	-30.5	TAGGAAATGGGTCCCTGATGTGT		20.7398		LR778001
novel_mir37	chr15 + 44095053 44095139	GTAATCCAAATGTGGTAAACACTGAAAACTATTGGCATTTTAAAGTATTAAGCCCTAGTGATCTGTGTTTACCAACTATAGGAGGTA	....(((.....((((((((((.((..((((..(((...............))).))))..)).))))))))))......)))....	-24.96	TAAACACTGAAAACTATTGGCA	CTAGTGATCTGTGTTTACCAACT	0.0859082	8.08929	LR778002
novel_mir38	chr15 + 100663107 100663191	GGTTTAAACCAAGCCAGCTCTCCTAAACAATTTTTTTTTTTTTTTTTTGAGAATTGTTTAGGAGAGCTGGCTTGGTTTAAACCAG	(((((((((((((((((((((((((((((((((((.............)))))))))))))))))))))))))))))))))))..	-58.92	AAGCCAGCTCTCCTAAACAATT	TTGTTTAGGAGAGCTGGCTTGG	2.10913	20.3004	LR778004
novel_mir39	chr15 - 100663105 100663189	GGTTTAAACCAAGCCAGCTCTCCTAAACAATTCTCAAAAAAAAAAAAAAAAAATTGTTTAGGAGAGCTGGCTTGGTTTAAACCAG	((((((((((((((((((((((((((((((((...................))))))))))))))))))))))))))))))))..	-54.71	AAGCCAGCTCTCCTAAACAATT	TTGTTTAGGAGAGCTGGCTTGG	2.10913	20.3004	LR778006
novel_mir40	chr16 - 72284297 72284375	GGCCTCCTAAGCCAGGGATTGTGGGTTCGAGTCCCACCTGGGGTGGGACTGTGCTCCCAAGATAACTTTTGGTGTTGGC	.(((......((((((.(((.((((..(((((((((((...))))))))).))..)))).)))....))))))...)))	-32.5	TCCCACCTGGGGTGGGACTGTGCTC	GACTGTGCTCCCAAGATAACTTT	0.0915503	32.5158	LR778008
novel_mir41	chr17 - 45556328 45556407	ATAGGTTGGTGCAAAATTAATTTTGTTTTTTGCCATTGCTTTCAATGGCAAAGACTGCAATTACTTTTGTACCAACCTAA	.(((((((((((((((.(((((.(..((((((((((((....))))))))))))..).))))).))))))))))))))).	-38.8		AAAGACTGCAATTACTTTTGT		32.6916	LR778010
novel_mir42	chr19 + 35447907 35447984	GTGTAGCTATATGGGGAGGTTCAGAGCATCAGATCCCAGGAATCCTGACCTCTGACCCCTGTCCCCAGCCTTATCATC	(((........((((((((.((((((..((((.((....))...)))).)))))).))...)))))).......))).	-24.66	ATGGGGAGGTTCAGAGCATCAGA	TGACCTCTGACCCCTGTCCCCAG	5.22127	1.91201	LR778011
novel_mir43	chr19 - 8902074 8902155	TGTGTGCCCCACTGCCCACAGCCTCACCAGGGGCCTGAAGACTGCCCTGTCCTTGATGGGGCTGTGATGTGATGGGGCTGCA	.(((.((((((..((.((((((((((.(((((((..(........)..))))))).))))))))))..))..))))))))).	-43.3		TCCTTGATGGGGCTGTGATGTGA		3.95462	LR778013
novel_mir44	chr2 + 793648 793726	CCTCCCAGCCGGAGAGGCCCAGCCCAGGCGTCGCCGCTCCTGCTGGTGCAGCCTGGGTGGAGCCTGACTTTCCCCGGAG	.((((.....(((((((((((.(((((((..((((((....)).))))..)))))))))).))))....))))..))))	-40.1		TGCAGCCTGGGTGGAGCCTGACT		13.8851	LR778014
novel_mir45	chr2 + 1165398 1165474	CTACATGTGGTTAGTGGCTGCCATATTGGATAGTAGAGCTGCACTATCCAATATGGTAGCCGCTGGCCATGTGTAGC	((((((((((((((((((((((((((((((((((........)))))))))))))))))))))))))))))))))).	-57.3	TTAGTGGCTGCCATATTGGAT		11.7662		LR778015
novel_mir46	chr2 + 11009681 11009760	ATTAGAATGGCACAAAAGTAACAGTGGTTTTGCCATTTAAAGTGATGACAAAAACTGCAATTACTTCTGCACCAACCTAA	.((((..(((..((.((((((..(..(((((..((((......))))...)))))..)..)))))).))..)))..))))	-20		CAAAAACTGCAATTACTTCTGC		3.25158	LR778016
novel_mir47	chr2 + 53498898 53498976	TAGGCTAGTGCAAAAGTAATCGTGGTTTTTGTGATTACTTTCAATGGCAAAAACTGCAGTTACTTTTGCACCAACCTAA	((((...(((((((((((((.(..((((((((.(((......))).))))))))..).)))))))))))))...)))).	-36.4	CAAAAGTAATCGTGGTTTTTGT		13.8989		LR778017
novel_mir48	chr2 + 92900419 92900499	ATTAGTTTGGCCCAAAAGTAATTGTGGTTTTTGCTATTACTTTCAATAGCAAAAACTGTGATTACTTTTGCATCAACCTAA	.((((.((((..((((((((((..((((((((((((((......))))))))))))))..))))))))))..)))).))))	-34.2	AAAAGTAATTGTGGTTTTTGCT	CAAAAACTGTGATTACTTTTGC	0.432004	11.1608	LR778018
novel_mir49	chr2 + 98613640 98613717	CTACTTTATTAAAAAGATTGAGGCCATGGTAGCTATTTATAGGTGTAGCTGTAGCCTCAGTCTTTTTAATAAAGTAGG	((((((((((((((((((((((((....((((((((........)))))))).)))))))))))))))))))))))).	-41.1	AAAAAGATTGAGGCCATGGTAGC	GCTGTAGCCTCAGTCTTTTTA	2.63642	0.0864009	LR778020
novel_mir50	chr2 + 115167461 115167541	TTAGGTTGGTGCAAAAGTAATTGCAAGTTTTTGCCATTACTTTCAATGGCAAAAACTGCAATTACTTCTGCACCAACAAAA	....(((((((((.(((((((((((.((((((((((((......))))))))))))))))))))))).)))))))))....	-47.2		CAAAAACTGCAATTACTTCTGC		3.25158	LR778022
novel_mir51	chr2 + 183603892 183603972	AGTAGGTTGGTGCAAACGTTATTGCATTTTTTGCTGTTAAAAGTAATGGCAAAAACTGCAATTACTTCTGCACCAGCCTCA	.(.(((((((((((...((.((((((.((((((((((((....)))))))))))).)))))).))...)))))))))))).	-39		CAAAAACTGCAATTACTTCTGC		3.25158	LR778023
novel_mir52	chr2 - 622472 622549	AAATTCTGGTTTAGGAGCCATGCAGCTGGAGGACACGATTCTGAACCTCCCTACACGGCTCCTAAGATCAGAGCTCGA	...((((((((((((((((.((.((..(((((.((......))..))))))).)).))))))).))))))))).....	-31.2	TTAGGAGCCATGCAGCTGGAGG	TCCCTACACGGCTCCTAAGAT	72.853	4.92131	LR778024
novel_mir53	chr2 - 90983580 90983658	CTTCAAAGGGAGAAAGGATTGCTAAGAAGCAGCCAAACTGTGAGGGTTTCTTCTTTCTTTCCTTTTTCCTTTTGGATGA	.(((((((((((((((((..(..((((((.((((..........)))).)))))).)..)))))))))))))))))...	-33.2	AGAAAGGATTGCTAAGAAGCAGC	TTCTTCTTTCTTTCCTTTTTCC	8.34865	0.0628345	LR778026
novel_mir54	chr2 - 135860466 135860544	TGTGCACCGCTCAACTCCAGGGGGAGCTACTCACATTGCAGTCTGTGTGAGAGCACCCTCTGGAGTAGTGCAGTGTGGC	...((((.((.(.(((((((((((.(((.(((((((........)))))))))).))))))))))).).)).))))...	-45		TGAGAGCACCCTCTGGAGTAGT		4.74555	LR778028
novel_mir55	chr20 + 11037810 11037898	GCAGTCAGGCTGCGTGAATGGATGTGACTGGGGACGGGAGCTTGCAGCAGCCCAGGGCACATCCATTCCTGCTAGCCTGCGCCTCTGCC	((((.(((((((((.(((((((((((.(((((.......((.....))..)))))..))))))))))).))).)))))).....)))).	-44.8	TGCGTGAATGGATGTGACTGGG		3.23571		LR778029
novel_mir56	chr20 + 12166283 12166359	TAAACTACTTATAAAGATGTATGCTCAATAGCGTATGTTAACATGTTACTCAGCGTATGTCTTTATAAGTAATTTAA	((((.((((((((((((((((((((.(.((((((........)))))).).)))))))))))))))))))).)))).	-28.8	ATAAAGATGTATGCTCAATAG		2.54854		LR778030
novel_mir57	chr20 + 41955439 41955527	CCGGCTCCCTGGCAGGCCGGGCATGGGGCAGGAGGTCACAGCAGCTAATCAAGTCCTTGCTGTGTTCTCCTGACTCACTGCCGAGCTCT	.((((..(((((....)))))..((((.((((((..((((((((((.....)))...)))))))..)))))).))))..))))......	-42.1	ATGGGGCAGGAGGTCACAGCA	TGCTGTGTTCTCCTGACTCACT	0.641817	5.62435	LR778031
novel_mir58	chr20 + 45675413 45675512	GGCCCATGAGTGCCTCTGTCACTGTGGCCAGCTGCTGTGCCACACAGGATGAGGTTCTGTCTGTGTCTGTGGGCATCCAGCTCTGCCACAGGGCCAGCTG	(((((...(((((....).))))(((((.(((((..(((((.((((((....((......))...))))))))))).)))))..))))).))))).....	-45.6		TGTGGGCATCCAGCTCTGCCACA		4.65767	LR778033
novel_mir59	chr20 + 45676507 45676596	TCAGATGGCAGCTGTGGCCAGCTGCTGTGCCACACAGGATGAGGTTCTGTCTGTGTCTGTGGGCATCCAGCTCTGCCACAGGGCCAGCTG	.(((.((((..(((((((.(((((..(((((.((((((....((......))...))))))))))).)))))..))))))).)))).)))	-46.1		TGTGGGCATCCAGCTCTGCCACA		4.65767	LR778034
novel_mir60	chr20 + 78137172 78137251	GGTGGTGGCTGGTGTGGCTGTGTGCTGAGGGTCTGTGGTCCCTGCGACTCTCAGGACGCCGCTGCACGTGCCGCCACCGG	(((((((((..(((..((.((((.(((((((((.(..(...)..)))))))))).)))).))..)))..)))))))))..	-55	TGTGGCTGTGTGCTGAGGGT	TCTCAGGACGCCGCTGCACGTG	64.2407	71.5534	LR778035
novel_mir61	chr20 - 77768506 77768603	GTACCTGGCGTGCGCAGTAGGTACCTGGTGTGTCTTTTCTGAAATGTTTGTTCAAGGATTAGACGTCACTCAGCTCGTGCTGAGCCAGCTGGATTACT	(((.(..((..((.(((((.(...(((((((((((..(((..(((....)))...)))..))))).))).)))..).))))).))..))..)..))).	-31.9	TGCGCAGTAGGTACCTGGTGT		29.9304		LR778037
novel_mir62	chr3 + 7526540 7526618	GCATTTCAGATTTTGGATTTTTGCATTTGGCATGTTCAACCTGTAAGTGCAAATGCAAATTTTCCAAAATCTGAAAAAA	...((((((((((((((..((((((((((.(((...(.....)...)))))))))))))...))))))))))))))...	-33.5	TTTTGGATTTTTGCATTTGGCA		2.94156		LR778038
novel_mir63	chr3 + 35605847 35605940	TGGCCCAGCCAGGGGGGACTGGCAGAGCTGGCTGGGACCCAGACTTGGTGGCGCCCAGGACCCCGGCCATGCACCTCTGCCTTGGGGATGGCAT	..(((...((((((.(((...(((..((((((((((.((((.......))).))))))....)))))..)))...))).))))))....)))..	-42		CCGGCCATGCACCTCTGCCTTG		30.4945	LR778039
novel_mir64	chr3 + 50419146 50419217	TTAGATCAGTGCAGAAGTAATTGCCATTTTTGAGCAATGGCAAAAACTGCAATTACTTCTGCATCAATCTAA	.(((((..((((((((((((((((..((((((........))))))..))))))))))))))))..))))).	-33.5		CAAAAACTGCAATTACTTCTGC		3.25158	LR778040
novel_mir65	chr3 + 55098954 55099030	ATATTATGGTTTAGGAGCCATGCAGCTGGAGGCTACAAGATTCTGACCCTCCCTAAATTGCTCCTAAGGTCAGAGCT	.........(((((((((.((..((..(((((...((......))..)))))))..)).))))))))).........	-20.2	TTAGGAGCCATGCAGCTGGAGG		74.7863		LR778041
novel_mir66	chr3 + 168769773 168769856	CAGCAATTCCCACGGAGCTTCAGAAATACAGATTTCCCAGACCCAGGAACCTGTATTTTTAGGAAGCTCCGCAAGAGATGCTGA	(((((.(((...(((((((((.(((((((((..((((........)))).)))))))))...)))))))))...))).))))).	-37.7	CACGGAGCTTCAGAAATACAGA		5.53647		LR778042
novel_mir67	chr3 - 283021 283118	ACCACAGGCGCATGCCACTGCACCTGCCTAATTAAAAAAAAAAAATTGGGCAAGGCGCGGTGGCTTACGCTTATAATCCCAGCGCTTCGAGAGGTGGA	.....(((((...((((((((.(((((((((((..........)))))))).))).))))))))...)))))......(((.(.(.....).).))).	-40.4	CATGCCACTGCACCTGCCTAAT	TTGGGCAAGGCGCGGTGGCTTAC	6.25081	0.269501	LR778043
novel_mir68	chr3 - 36846461 36846551	GCCTGGAGGGTCTGAGGAGCTGTCTTAGTGGAGTCCCTTCCTCGAGGGCTCACTCTCCACTGGGCATGGCTCCCAGGTCCCCCGCCCCGCT	((.(((.((..(((.((((((((((((((((((.(((((....)))))......)))))))))).)))))))))))..)).)))....)).	-47.4	TCTGAGGAGCTGTCTTAGTGGAGT		1.91201		LR778045
novel_mir69	chr3 - 56469978 56470057	TACTAAAATCCCAGAATTCACTATATGTAGGATGGATATGGATTCGCTATATATAGTGAATTCTGGGATTTTATATATTG	...(((((((((((((((((((((((((((..(((((....)))))))))))))))))))))))))))))))).......	-40.2	CCAGAATTCACTATATGTAGGA	ATATATAGTGAATTCTGGGATT	3.45633	7.55773	LR778046
novel_mir70	chr3 - 76408042 76408141	AGCGCGGCCGGCTCAACATGCAGGTGGGCATTGGGATGGGCCCATCTCCCAACTGGGATGATGGACTCCTCTGCCGATGCTCAGCCTCCCCTGCGCC	...((((...((.......)).((((((((((((.(.(((.(((((((((....)))).)))))...))).).)))))))))).))....))))	-40.1		TGGACTCCTCTGCCGATGCT		12.6548	LR778048
novel_mir71	chr3 - 118654784 118654860	TGCTTCCATGTGTCAACCTTGACTTCCTCTGACATGTCATGGCCAAAGCAAGTCAGGCTTGGCAAAGGGAGGGAGAA	..(((((...((((((.((((((((.((.((.(((...)))..)).)).)))))))).))))))...))))).....	-27.6	TGTCAACCTTGACTTCCTCTGA	GCAAGTCAGGCTTGGCAAAG	2.79448	0.0690132	LR778049
novel_mir72	chr3 - 168440994 168441073	ATTATAGGCATGAGCCACTGTGCCTGACCCTGTTGGAATATAAAAAAGAGCTCGGTGCAGTGGCTCACGCCTGTAATCCC	(((((((((.((((((((((..((.((.(((.(((.....)))...)).).))))..)))))))))).)))))))))...	-39.8	TGAGCCACTGTGCCTGACCCTGT	AGCTCGGTGCAGTGGCTCACGC	4.21827	0.703044	LR778051
novel_mir73	chr4 + 35964176 35964256	TAGGTTGGCGCAAAAGTAATCGTGGTTTTTGTCATTACTTGTAAAATTGTAAAAACCATGATTACTTTTGCACCAGCCTAA	((((((((.((((((((((((((((((((((..(((........)))..)))))))))))))))))))))).)))))))).	-44.7	CAAAAGTAATCGTGGTTTTTGT		12.1339		LR778053
novel_mir74	chr4 + 61169213 61169290	CTCTGAAAGGACAGTGGCTGGCACATCTTGGGTGTTTCATTCACCTGGGTGTGCTCAGTGACTGGAGAATTTACATCT	...........((((.(((((((((.((..((((.......))))..))))))).)))).)))).............	-31.8	ACAGTGGCTGGCACATCTTGGGT	TGGGTGTGCTCAGTGACTGGA	2.27971	9.11883	LR778054
novel_mir75	chr4 + 120974936 120975006	TGTATGTGTATGTGTGTGTGTATATATGGATATATATATATATTATATATATGAGTATATATATATATACT	...........((((((((((((((((..(((((((((.....)))))))))..)))))))))))))))).	-24.5	TGTGTGTGTGTATATATGGAT		5.62435		LR778056
novel_mir76	chr4 + 145411669 145411747	ATAGGTTGGTGCAAAAGTAATCATGGTTTTTATCTTTAAAAGTAATGGCAAAAACTGTGATTACTTTTGTACCAACCTA	.((((((((((((((((((((((((((((((..(.(((....))).)..))))))))))))))))))))))))))))))	-43		CAAAAACTGTGATTACTTTTG		4.83343	LR778057
novel_mir77	chr4 + 145755636 145755712	CTCAATAAATTGATCCCTTATGTTCTCCTAGAGTCATAGGAGATCTAGGAGAACATAAGGGATCAATTTATTGAATA	.(((((((((((((((((((((((((((((((.((....))..)))))))))))))))))))))))))))))))...	-51.2	TGATCCCTTATGTTCTCCTAGA	TAGGAGAACATAAGGGATCAAT	1.58185	0.878805	LR778058
novel_mir78	chr4 + 159526607 159526697	TCACAGTTGGAGAGACTCACTGACTTTGTGTGCACGTGTGCATGTTTGTGTGTGAGTGTGAGTGTGTGTGTGTGAGTGTGCATGAGTGTAT	.((((.(((.(.(.((.((((.((((..((..(((((....))))..)..))..)).)).)))).)).).).))).))))...........	-22.9		TGAGTGTGTGTGTGTGAGTGTGC		9.40322	LR778060
novel_mir79	chr4 - 55054585 55054667	TGGGGGGCAGTACACAGACGCTTTCTGCTCCAGTGCCTTTTGCAAATGTCGTTGGGGCAGTGAGGGTCTGTGTACTGCCCCCT	.((((((((((((((((((.(((.(((((((((((.(..........).))))))))))).))).))))))))))))))))))	-57.8		TTGGGGCAGTGAGGGTCTGTGT		1.40609	LR778061
novel_mir80	chr4 - 134691771 134691848	CTCTATTATGAGAATGTGGGAGTCTGTGGCTATCAAAACACAAAATAGCCACAGACTCCCATATTCTCATAATATAGC	((.((((((((((((((((((((((((((((((...........)))))))))))))))))))))))))))))).)).	-51	AGAATGTGGGAGTCTGTGGCT		9.0517		LR778062
novel_mir81	chr4 - 139239876 139239974	GGAGATGGAGTAGGGAAGAAGTTAGGGTCAGTGGCAGAGCCAGGCAGATGCTGACACTTTTTCTCTTCCCCAGACCCCCACTTTGAGGAGCCAGGTCCA	(((..(((....(((((((.(..(((((((((.((........))....)))))).)))..).))))))).....((.(.....).))..)))..))).	-32	TAGGGAAGAAGTTAGGGTCAGT	TGACACTTTTTCTCTTCCCCAG	4.30615	0.171816	LR778063
novel_mir82	chr4 - 141885965 141886062	CAAGTGTCCCAGGTGTCAGGATGGCCGAGTGGTCTAAGGCGCCAGACTCAAGCTTGGCTTCCCCGTGTTGAGGATTCTGGTCTCCAATGGAGGCGTGG	..((.((((..((..(..(((.(((((((((((((........)))))...)))))))))))..)..))..)))).)).((((((...))))))....	-34.1	AGGTGTCAGGATGGCCGAGTG	CTTGGCTTCCCCGTGTTGAGGA	22.0617	0.803355	LR778065
novel_mir83	chr4 - 145755634 145755710	TTCAATAAATTGATCCCTTATGTTCTCCTAGATCTCCTATGACTCTAGGAGAACATAAGGGATCAATTTATTGAGTA	((((((((((((((((((((((((((((((((((......)).))))))))))))))))))))))))))))))))..	-51.9	TGATCCCTTATGTTCTCCTAGA	TAGGAGAACATAAGGGATCAAT	1.84549	0.878805	LR778067
novel_mir84	chr5 + 24444105 24444191	ATTATAGGTGTGAGCCACCATGCCTGGCCTTGTTCTCATTTTAAGAAAGTACAGAGAGAGGCTGGACATGGTAGCTTATGCCTGTAA	.((((((((((((((.((((((.(..(((((..((((................)))))))))..).)))))).))))))))))))))	-42.39		GAGAGGCTGGACATGGTAGCTT		6.41528	LR778069
novel_mir85	chr5 + 60845476 60845569	GGTGTATATATGTTATATATATTTATACACCATGTATGGTATATATATTTATACGCCATATATATGGTGTGTGTGTATGTATATCTATATACAC	.(((((((((.(.(((((((((.((((((((((((((((..((((....))))..))))))..)))))))))).))))))))).))))))))))	-40.4		TATGGTGTGTGTGTATGTATAT		2.7243	LR778070
novel_mir86	chr5 - 1734967 1735043	ACACACTTGCCACCCTTTCTGTCTACAGCGTTCCCAGTCTAGGGAATGACGTAGGCAGAAAGGCTGCCAGAGAGAAC	.....(((..((.(((((((((((((..(((((((......)))))))..))))))))))))).))...))).....	-35.8		ATGACGTAGGCAGAAAGGCTG		13.5336	LR778071
novel_mir87	chr5 - 24166358 24166454	GTGCAGTGCCTGAGTGTGTGTGTGTGAGTGTATATATATATATCTATATGTATAGATATATATCTCAGGGTCTTCATATATCTCATTTCATTGCTCT	(.((((((..((((.(((((((...((.(.(....((((((((((((....))))))))))))...).).))..)))))))))))...)))))).).	-29	TGAGTGTGTGTGTGTGAGTGTAT		12.479		LR778072
novel_mir88	chr5 - 37870220 37870300	ATTATGTTTGTGCAAAAGTAATCACGGTTTTTTCCCTTAAAAGTAATGGCAAAAACTGTGATTACTTTTGCACCAACCTAA	.(((.(((.(((((((((((((((((((((((.((.(((....))).)).))))))))))))))))))))))).))).)))	-37		CAAAAACTGTGATTACTTTTGC		11.1608	LR778073
novel_mir89	chr5 - 138826830 138826907	AATCACTGGCAATGGCTACAGGGGCACTATGATTATCTGAGTGAAGCATATGGCTGTGTAGCCTGAACCAGTGTGGGG	...((((((....(((((((.((.((.((((....((.....))..)))))).)).)))))))....)))))).....	-30	AATGGCTACAGGGGCACTATGAT	CATATGGCTGTGTAGCCTGAAC	5.22127	0.0859082	LR778074
novel_mir90	chr5 - 139499869 139499943	TCTGATTGTAGCCGGAGGCGGGGCCGGTCCTGCATCTCGACTGTAGCTCCGGTCCCTTCTCCAACCTATTTCTCT	...((..((((..(((((.((((((((..(((((.......)))))..)))))))).)))))...)))).))...	-33.1	TCTCGACTGTAGCTCCGGTCCCTT	TAGCTCCGGTCCCTTCTCCAAC	0.0915503	59.583	LR778076
novel_mir91	chr6 - 160406126 160406197	TGTGTGTGTGTGTGTGTGTGTATATATGGATATATATATATATATATCCCAATATAATAACATACATGCCAA	....((.((((((((((...(((((..(((((((((....)))))))))..)))))...)))))))))))).	-25.2	TGTGTGTGTGTATATATGGAT		5.97588		LR778078
novel_mir92	chr7 + 19456086 19456173	CCAGTGGAGGAAGGTGGCTGGATGGTGATTCTCTGGACCCTTCCTCGAAATTAAACAGAGATCACCTCCCGTCCCTCACCCCCACTGT	.((((((.((.(((.(((.(((.((((((.(((((....................)))))))))))))).))))))..)).)))))).	-38.85	AGGTGGCTGGATGGTGATTCTCT		3.69098		LR778079
novel_mir93	chr7 + 52858034 52858114	CACGAGGGTGTCCGGGCAGGTGGCTGGAGGGGTCCCAGGCTGCACCTGCCCACCTGTCACCTGTCCTGCAGGCCTCCTGGC	((.((((.(....(((((((((((.((.(((....((((.....))))))).)).)))))))))))....).)))).))..	-40.8	TCCGGGCAGGTGGCTGGAGGG	CACCTGTCACCTGTCCTGCAG	2.13263	0.966686	LR778080
novel_mir94	chr7 + 167936485 167936572	AATCTGAAGAGCTCTTCTGCCTCTGTCTTCTGTCCTTTAGAGAGAGAACTGTGTGGGCTGGTCCGAAGGTAGTGAGTTATCTCAACTG	....(((..(((((..(((((((.(.((...((((..((.((......)).)).)))).)).).).)))))).)))))...)))....	-23.2		GGCTGGTCCGAAGGTAGTGAGTT		142.151	LR778082
novel_mir95	chr7 - 36359115 36359197	GGACCTAGGCTAGGAGTTGTTAGCATGGGAGGTTTTCCCATGCTAAGAAGTCCTCCCATGCTAAGAACTCCTAGACTAGGAGT	...(((((.(((((((((.(((((((((((((.((((.........)))).))))))))))))).))))))))).)))))...	-51.6		CCTCCCATGCTAAGAACTCCT		8.61229	LR778083
novel_mir96	chr8 + 6694444 6694522	ACAGATGGATTTACTTAGGATGAAACATGTTCTTTCAATCCCATTTGGATAGGTTTTATCCTATGTATATCTATCTGTA	((((((((((.(((.(((((((((((.(((((..............))))).))))))))))).))).)))))))))).	-33.34	TTACTTAGGATGAAACATGTTC		8.43653		LR778084
novel_mir97	chr8 + 18034834 18034908	AGGTTGGTGCAGAAGTAATTGTGGTTTTGGTCGTTTTTTCAATGGCAAAACCCACAATTACTTTTACACCAATCC	.((((((((.((((((((((((((.(((.((((((.....)))))).))).)))))))))))))).)))))))).	-36.2	AGAAGTAATTGTGGTTTTGGTC		7.55773		LR778085
novel_mir98	chr8 + 96055531 96055613	ACTCCAGCCTTAGTGACAGAGCGAGACCTTGTCTTTTTTTTTTTTTTGAGACCAAGTCTTACTCTGTCACCGAGGCTGGAGTG	((((((((((..(((((((((..((((...(((((............)))))...))))..)))))))))..)))))))))).	-49.4	TAGTGACAGAGCGAGACCTTGT	CCAAGTCTTACTCTGTCACCG	6.94256	39.1068	LR778086
novel_mir99	chr8 + 101861464 101861538	TGGAGTCCCCAACGGCCGCGGCGCTCGCTGACCCCAACTGGCTGCGGGGGTCGTGGCCGCCCGCTCCGGGACCCG	.((.(((((...((((((((((.(((((.(.((......))).))))).))))))))))........))))))).	-42.3	AACGGCCGCGGCGCTCGCTGA		1.58185		LR778088
novel_mir100	chr8 + 131849865 131849960	GGCATCTCCTCAATGTACTAAGCGCTGGGAATGTAGAGACTGACCAAATATGGTCCCTGCCCTCAAGGAGCTCACAGTCTATTGGGAAAAAGATGT	.((((((.(((((((.(((.(((.((..((..((((.(...(((((....))))))))))..))..)).)))...))).)))))))....))))))	-28.1		AAGGAGCTCACAGTCTATTGGG		6.23952	LR778089
novel_mir101	chr8 - 146403655 146403737	GTCCTGTTTGCACTTGCCTGACTGAGTCTAAATCTATGGGCAGAAGGCAGTTTGGACTTGCAGGCATGTTGCATCACAAGGCT	(((.(((.(((((.((((((...((((((((((......((.....)).)))))))))).)))))).).))))..))).))).	-30	CACTTGCCTGACTGAGTCTAAATC	TTTGGACTTGCAGGCATGTTGCA	0.439403	16.7852	LR778090
novel_mir102	chr9 + 13049383 13049458	ATCGCAGAGGTGAGGTAATTTCCACAGGGCCACCCAGGGAGTGAGTGACCTAGTGGAAGTTACCTTACCTCTGTGA	.((((((((((((((((((((((((.(((.(((.((.....)).))).))).))))))))))))))))))))))))	-49.9		TGACCTAGTGGAAGTTACCTT		3.69098	LR778092
novel_mir103	chr9 + 61473932 61474015	CAGGTTATGCACGGTCCATTTTGCTCTGCTTCTGACAGCTGAGTACTTTGCAAGCAGAGCAAAATGGACTGTGCATAACCTGGG	((((((((((((((((((((((((((((((((..((......)).....).)))))))))))))))))))))))))))))))..	-56.3	ACGGTCCATTTTGCTCTGCTT	AGCAGAGCAAAATGGACTGTGC	47.104	8.17289	LR778093
novel_mir104	chr9 + 77242150 77242228	TAGGTTGGTGCAAAAGTAATCGTGGTTTTTGTCATTGAAAGTAATGGTAAAAACCACAATTACTTTTGCACCAACGTAA	((.(((((((((((((((((.(((((((((..(((((....)))))..))))))))).))))))))))))))))).)).	-45.5	CAAAAGTAATCGTGGTTTTTGT		12.1339		LR778095
novel_mir105	chr9 + 118219640 118219720	ATTAGGCTGGTGCACAAGTCATTGCCATTTTTGCCAAGAAAAGTAACGGCAAAAACTGCAATTACTTCTGCGCCAGCCTAA	.(((((((((((((.((((.(((((..((((((((............))))))))..))))).)))).)))))))))))))	-42.4		CAAAAACTGCAATTACTTCTGC		3.25158	LR778096
novel_mir106	chr9 - 6161053 6161137	TGTATTTTTTTCATGTCTCTTGTTTTGTTTACTGATTTTGATCCATTGAAAGTAATAAGACATGAGGCTTGAGCAAAATATTTC	.(((((((.((((.(((((.(((((((((.(((.................)))))))))))).))))).)))).)))))))...	-22.53	TCATGTCTCTTGTTTTGTTTACT	TAATAAGACATGAGGCTTGAG	0.344615	31.9885	LR778097
novel_mir107	chr9 - 96275576 96275655	CTCCTCAACTCCAGTGTTCTCTACAGGGTGATGCTAAAATGGTGGTCATTAACCCTGTACAGTACTCTGGAGCTAAGGAA	.((((...((((((.((.((.(((((((((((((((......))).)))).)))))))).)).)).))))))...)))).	-35.1		TTAACCCTGTACAGTACTCTGG		18.367	LR778099
novel_mir108	chrUn_KE145881 + 325238 325322	GAGTTTTCAGGCGGGTGGGTGGGGGAGGTGCGGAGTTCTTGGTTATATCGCTCCGTCCACCCCTGAACCCTACGCCTGGGTTCTG	.((..((((((((...(((((((((.((.(((((((.............))))))))).)))))..))))..))))))))..)).	-43.62		TCCGTCCACCCCTGAACCCTAC		5.888	LR778100
novel_mir109	chrUn_KE145888 + 233077 233154	AAATTCTGGTTTAGGAGCCATGCAGCTGGAGGACACGAGTCTGACCCTCCCTACACGGCTCCTAAGATCAGAGCTCGA	...((((((((((((((((.((.((..(((((.............))))))).)).))))))).))))))))).....	-31.42	TTAGGAGCCATGCAGCTGGAGG	TCCCTACACGGCTCCTAAGAT	72.853	5.00919	LR778101
novel_mir110	chrUn_KE146037 - 8687 8764	ACGTGTTTGAAATCCTGGATGGACAGACTCGTGTACCTTCGTGTTACGTGTTTGAAATCCTGGATGGACAGACCCGTG	(((.(((((..((((.((((...(((((.((((.((......)))))).)))))..)))).))))...))))).))).	-27.1	AATCCTGGATGGACAGACTCGT		25.5732		LR778103
novel_mir111	chrUn_KE146672 - 793 870	ACGTGTTTGAAATCCTGGATGGACAGACTCGTGTACCTTCATGTTACGTGTTTGAAATCCTGGATGGACAGACCCGTG	(((.(((((..((((.((((...(((((.((((.((......)))))).)))))..)))).))))...))))).))).	-27.1	AATCCTGGATGGACAGACTCGT		25.5732		LR778104
novel_mir112	chrX + 62602787 62602863	TTAGGTGACCATGATTATACAGGCCTAAATGTTTGAACAAGAAACATTTAGGCCTGTATAATCATGGTCACCTAAAT	((((((((((((((((((((((((((((((((((.......))))))))))))))))))))))))))))))))))..	-57.1	ATGATTATACAGGCCTAAATGT	ATTTAGGCCTGTATAATCATGG	8.78805	76.5439	LR778105
novel_mir113	chrX + 103757569 103757645	AGGTTGGTGCAAAAGGATTTGTGGTTTTTGCCTGTAAAAGTAATGGCAAAAACCGCAATTCCTTTTGCACCAACCTA	(((((((((((((((((.((((((((((((((............)))))))))))))).))))))))))))))))).	-53.3	AAAAGGATTTGTGGTTTTTGCC		2.90006		LR778107
novel_mir114	chrX - 6107273 6107353	ATTAGGTTGGTGCAAAAGTCATTGCGGTTTTGGCCATCATTTTCAATGGCAAAGACTGCAATTACTTTTGTTCCACCCTAA	.(((((.(((.((((((((.(((((((((((.(((((........))))).))))))))))).)))))))).))).)))))	-39.9		AAAGACTGCAATTACTTTTGT		32.6037	LR778108
novel_mir115	chrX - 62602785 62602861	TTAGGTGACCATGATTATACAGGCCTAAATGTTTCTTGTTCAAACATTTAGGCCTGTATAATCATGGTCACCTAACA	((((((((((((((((((((((((((((((((((.......))))))))))))))))))))))))))))))))))..	-56.2	ATGATTATACAGGCCTAAATGT	ATTTAGGCCTGTATAATCATGG	8.78805	76.5439	LR778109
novel_mir116	chrX - 129329020 129329098	ATAGGTTGGTGCGGAAGTAATTGTGTTTTTTGCCATGAAAGCAATGGCAAAAACTGCAATTACTTCTGCACCAACCTAA	.(((((((((((((((((((((((..((((((((((.......))))))))))..))))))))))))))))))))))).	-52.6		CAAAAACTGCAATTACTTCTGC		3.25158	LR778111
Average expression levels for each mature miRNA were normalized by transcripts per million;
MFE: minimal folding free energy.
