# Supplementary material for: Analysis of conserved miRNAs in cynomolgus macaque genome using small RNA sequencing and homology searching
Source: PeerJ. 2020 Jul 10;8:e9347. doi: 10.7717/peerj.9347 (PMC7357559; doi:10.7717/peerj.9347)
Supplement: Supplemental Information 3 — °: single underlines means that the sRNA read perfectly matched the mature miRNA sequence deposied in miRBase, while the relavent pre-miRNA sequence did not found in cynomolgus macaque genome; Average expression levels for each mature miRNA were normalized by transcripts per million. [file peerj-08-9347-s003.xlsx]

## Sheet: Supplemental Table S3
Supplemental Table S3. 383 M. fascicularis pre-miRNAs identified by small RNA sequencing
pre-miRNAs º	Stem-loop sequences	Mature sequences (5p)	Mature sequences (3p)	Average expression level		number of gene mapping location
				5p	3p
let-7a-1	TGGGATGAGGTAGTAGGTTGTATAGTTTTAGGGTCACACCCACCACTGGGAGATAACTATACAATCTACTGTCTTTCCTA	TGAGGTAGTAGGTTGTATAGTT	CTATACAATCTACTGTCTTTC	48666	17.1834	3
let-7b	CGGGGTGAGGTAGTAGGTTGTGTGGTTTCAGGGCAGTGATGTTGCCCCTCAGAAGATAACTATACAACCTACTGCCTTCCCTG	TGAGGTAGTAGGTTGTGTGGTT	CTATACAACCTACTGCCTTCCC	19273.3	3.30159	1
let-7c	GCATCCGGGTTGAGGTAGTAGGTTGTATGGTTTAGAGTTACACCCTGGGAGTTAACTGTACAACCTTCTAGCTTTCCTTGGAGC	TGAGGTAGTAGGTTGTATGGTT		1622.1		1
let-7d	CCTAGGAAGAGGTAGTAGGTTGCATAGTTTTAGGGCAGGGATTTTGCCCACAAGGAGGTAACTATACGACCTGCTGCCTTTCTTAGG	AGAGGTAGTAGGTTGCATAGTT	CTATACGACCTGCTGCCTTTCT	3878.06	379.744	1
let-7e	CCCGGGCTGAGGTAGGAGGTTGTATAGTTGAGGAGGACACCCAAGGAGATCACTATACGGCCTCCTAGCTTTCCCCAGG	TGAGGTAGGAGGTTGTATAGTT		115.504		1
let-7f-1	TCAGAGTGAGGTAGTAGATTGTATAGTTGTGGGGTAGTGATTTTACCCTGTTCAGGAGATAACTATACAATCTATTGCCTTCCCTGA	TGAGGTAGTAGATTGTATAGTT	CTATACAATCTATTGCCTTCCC	122789	1.48049	1
let-7f-2	TGTGGGATGAGGTAGTAGATTGTATAGTTTTAGGGTCATACCCCATCTTGGAGATAACTATACAGTCTACTGTCTTTCCCACG		CTATACAGTCTACTGTCTTTCC		1.36439	1
let-7g	AGGCTGAGGTAGTAGTTTGTACAGTTTGAGGGTCTATGATACCACCCGGTACAGGAGATAACTGTACAGGCCACTGCCTTGCCA	TGAGGTAGTAGTTTGTACAGTT		22132.4		1
let-7i	CTGGCTGAGGTAGTAGTTTGTGCTGTTGGTCGGGTTGTGACATTGCCCGCTGTGGAGATAACTGCGCAAGCTACTGCCTTGCTA	TGAGGTAGTAGTTTGTGCTGTT	CTGCGCAAGCTACTGCCTTGCT	10562.8	9.35607	1
mir-100	CCTGTTGCCACAAACCCGTAGATCCGAACTTGTGGTATTAGTCCGCACAAGCTTGTGTCTATAGGTATGTGTCTTTTAGG	AACCCGTAGATCCGAACTTGTG		324.488		1
mir-101-1	TGCCCTGGCTCAGTTATCACAGTGCTGATGCTGTCCATTCTAAAGGTACAGTACTGTGATAACTGAAGGATGGCA	TCAGTTATCACAGTGCTGATGCT	TACAGTACTGTGATAACTGAA	1.36284	6117.99	2
mir-103-1	TACTGCCCTCGGCTTCTTTACAGTGCTGCCTTGTTGCATATGGATCAAGCAGCATTGTACAGGGCTATGAAGGCATTG		AGCAGCATTGTACAGGGCTATGA		6315.67	2
mir-10399	GGACAAGACAAATTACAGATTGTCTCAGAGAAAACAGATGAGTTACTCTCTCAGACAAGCTGTAGGTCCTACATAAATGTCCA	AATTACAGATTGTCTCAGAGA		14.0432		1
mir-106a	CTCTCTGCTTTCAGCTTCTTTACAGTGTTGCCTTGTGGCATGGAGTTCAAGCAGCATTGTACAGGGCTATCAAAGCACAGA	AAAAGTGCTTACAGTGCAGGTAG		16.914		1
mir-106b	GCTTGGGAAACATACTTCTTTATATGCCCATATGGACCTGCTAAGCTATGGAATGTAAAGAAGTATGTATCTCAGGC	TAAAGTGCTGACAGTGCAGAT	CCGCACTGTGGGTACTTGCTGC	273.056	526.243	1
mir-107	CTCTCTGCTTTCAGCTTCTTTACAGTGTTGCCTTGTGGCATGGAGTTCAAGCAGCATTGTACAGGGCTATCAAAGCACAGA		AGCAGCATTGTACAGGGCTATCA		1702.86	1
mir-10a	GATCTGTCTGTCTTCTGTATATACCCTGTAGATCCGAATTTGTGTAAGGAATTTTGTGGTCACAAATTCGTATCTAGGGGAATATGTAGTTGACATAAACACTCCGCTCT	TACCCTGTAGATCCGAATTTGTG	AAATTCGTATCTAGGGGAATA	1403.96	3.43087	1
mir-10b	CCAGAGGTTGTAACGTTGTCTATATATACCCTGTAGAACCGAATTTGTGTGGTATCCATATAGTCACAGATTCGATTCTAGGGGAATATATGGTCGATGCAAAAACTTCA	TACCCTGTAGAACCGAATTTGTG		27.9016		1
mir-1-1	GCTTGGGAAACATACTTCTTTATATGCCCATATGGACCTGCTAAGCTATGGAATGTAAAGAAGTATGTATCTCAGGC		TGGAATGTAAAGAAGTATGTAT		4.94809	2
mir-1180	GCTGCTGGACCCACCCGGCCGGGAATAGTGCTCCTGGTTGTTTCCGGCTCGCGTGGGTGTGTCGGCGGC		TTTCCGGCTCGCGTGGGTGTGT		115.704	1
mir-1185-1	TTTGGTACTTGAAGAGAGGATACCCTTTGTATGTTCACTTGATTAATGGCGAATATACAGGGGGAGACTCTTATTTGCGTATCAAA		ATATACAGGGGGAGACTCTTAT		24.2049	1
mir-1185-2	TTTGGTACTTAAAGAGAGGATACCCTTTGTATGTTCACTTGATTAATGGCGAATATACAGGGGGAGACTCTCATTTGCGTATCAAA		ATATACAGGGGGAGACTCTCAT		0.730052	1
mir-122	CCTTAGCAGAGCTGTGGAGTGTGACAATGGTGTTTGTGTCTAAACTATCAAACGCCATTATCACACTAAATAGCTACTGCTAGGC	TGGAGTGTGACAATGGTGTTTG		7.11048		1
mir-1226	GTGAGGGCATGCAGGCCTGGATGGGGCAGCTGGGATGGTCCAAAAGGGTGGCCTCACCAGCCCTGTGTTCCCTAG		TCACCAGCCCTGTGTTCCCTAG		0.548101	1
mir-1235	GTGGGCCTGGGTCGGTGGGGACGGGGCGGCTGGGCGTGCCCTGCGGCCGCTGCTCTAACCGCACCGTCCCCCAG		TCTAACCGCACCGTCCCCCAG		0.23055	1
mir-1240	GTGGGCCAGGGCCGCGGGGGGGAGCAAGCCATCTAGCATTCCTGGGAAACGCTTACATCTCACCATGACCCTGATCCCACTAG		TCACCATGACCCTGATCCCACT		0.355738	1
mir-1246	TGTATCCTTGAATGGATTTTTGGAGCAGGAGTGGACACCTGACCCAAAGGAAATCAATCCATAGGCTAGCAAT	AATGGATTTTTGGAGCAGG		0.962096		1
mir-1248	TTTACCTTCTTGTATAAGCACTGTGCTAAAATTGCAGACACTAGGACCATGTCTTGGTTTTTGCAATAATGCTAGCAGAGTACACACAAGAAGAAAAGTAACAGCA	ACCTTCTTGTATAAGCACTGTGCTAAA		2.54575		1
mir-1249	GGGAGGAGGGAGGAGATGGGCCAAGTTCCCTCTGGCTGGAACGCCCTTCCCCCCCTTCTTCACCTG		ACGCCCTTCCCCCCCTTCTTCA		4.68662	1
mir-124a-1	ATCAAGATCAGAGGCTCTGCCCTCCGTGTTCACAGCGGACCTTGATTTAATGTCATACAATTAAGGCACGCGGTGAATGCCAAGAGCGGAGCCTACGGCTGCACTTGAA		TTAAGGCACGCGGTGAATGCCA		0.217723	3
mir-1250	TCTCGCTGGCCTGGAAGGTGACGGTGCTGAATGTGGCCTTTTTGCCTTTTCCAAAGGCCACATTTTCCAGCCCATTCACCCTTCCAGAGCCCTCTGAGGTGGCCTAGGCC	ACGGTGCTGAATGTGGCCTT		0.230067		1
mir-1255a	NNNNNNNGAGTTGCTTCTCAAGGATGAGCAAAGGAAGTAGTTTTTTTAGATTCCAAAGAAACTACCTACTTTGCTCATCTTTGAGAAGCAACTCTTTATCCATTAAAATTT	AGGATGAGCAAAGGAAGTAGT	CTACCTACTTTGCTCATCTTTG	33.6714	1.70247	1
mir-1255b	CTTCACTAGGAGTTGCTTCTTACGGATAAGCAAAGAAAGTGGTTTGAGCCTCAGGAAACCACTTTCTTTGCTCATCTGTAAGGAGCAACTCCTTATCTGTTCAAGTTTTATC	TACGGATAAGCAAAGAAAGTGG		9.58363		1
mir-125a	TGCCAGTCTCTGGGTCCCTGAGACCCTTTAACCTGTGAGGACATCCAGGGTCACAGGTGAGGTTCTTGGGAGCCTGGCGTCTGGCC	TCCCTGAGACCCTTTAACCTGTGA	ACAGGTGAGGTTCTTGGGAGCC	265.709	1.47997	1
mir-125b-1	TGCGCTCCTCTCAGTCCCTGAGACCCTAACTTGTGATGTTTACCGTTTAAATCCACGGGTTAGGCTCTTGGGAGCTGCGAGTCGTGCT	TCCCTGAGACCCTAACTTGTGA	ACGGGTTAGGCTCTTGGGAGCT	64.8575	0.52339	1
mir-125b-2	ACCAGACTTTTCCTAGTCCCTGAGACCCTAACTTGTGAGGTATTTTAGTAACATCACAAGTCAGGCTCTTGGGACCTAGGCGGAGGGGA		TCACAAGTCAGGCTCTTGGGAC		1.49765	1
mir-126	CGCTGGCGACGGGACATTATTACTTTTGGTACGCGCTGTGACACTTCAAACTCGTACCGTGAGTAATAATGCGCCGTCCACGGCA	CATTATTACTTTTGGTACGCG	TCGTACCGTGAGTAATAATGCG	577.536	15817.7	1
mir-1260b	GTGGCTGCTGCTCTCCGTTTATCCCACCACTGCCACCATTATTGCTACTGTTCAGCAGGTGCTGCTGGTGGTGATGGTGATAGTCTGGTGGGGGCGGTGGGGCTGCTG	ATCCCACCACTGCCACCA		0.649063		1
mir-1262	TTGACCATAAAAAATAAATTCTGTGAATTTCATCCTTCTATAAATTCATCCATCACATTATCTAGAATGGTGATGGGTGAATTTGTAGAAGGATGAGAGTCAAAGAATCCTT	TTCTATAAATTCATCCATCACA	TGATGGGTGAATTTGTAGAAGG	1.66589	414.81	1
mir-127	TGTGATCACTGTCTCCAGCCTGCTGAAGCTCAGAGGGCTCTGATTCAGAAAGATCATCGGATCCGTCTGAGCTTGGCTGGTCGGAAGTCTCATCATC	CTGAAGCTCAGAGGGCTCTGAT	TCGGATCCGTCTGAGCTTGGCT	3.96937	318.725	1
mir-1271	CCCCAGCACCCAGATCAGTGCTTGGCACCTAGCAAGCACTCAGTAAATACTTGTTGAGTGCCTGCTATGTGCCGGGCATTGTGCTGAGGGCTTTGTGGGGATCCAGAGG	CTTGGCACCTAGCAAGCACTCA		18.779		1
mir-1277	ACCTCCCAAATATATATATATATGTACGTATGTGTATATAAATGTATACGTAGATATATATGTATTTTTGGTGGGTTT	AAATATATATATATATGTACGTAT	TACGTAGATATATATGTATTTT	58.2273	4.4091	1
mir-128-1	TGAGCTGTTGGATTCGGGGCCGTAGCACTGTCTGAGAGGTTTACATTTCTCACAGTGAACCGGTCTCTTTTTCAGCTGCTTC	CGGGGCCGTAGCACTGTCTGAGA	TCACAGTGAACCGGTCTCTTT	1.794	3398.07	1
mir-1284	TATAAGCCAGTTTAATGTTTTCTGTACAGACCCTGGCTTTTCTTAAATTTTATATATTGGAAAGCCCATGTTTGTATTGGAAACTGCTGGTTTCTTTCATATTGAAAATC	TCTGTACAGACCCTGGCTTT		2.65472		1
mir-128b	TGTGCAGTGGGAAGGGGGGCCGATACACTGTACGAGAGTGAGTAGCAGGTCTCACAGTGAACCGGTCTCTTTCCCTACTGTGTC		TCACAGTGAACCGGTCTCTTT		1550.83	1
mir-1294	CACCTAATGTGTGCCAAGATCTGTTCATTTATGATCTCACCGAGTCCTGTGAGGTTGGCATTGTTGTCTGGCATTGTCTGATATACAACAGTGCCAACCTCACAGGACTCAGTGAGGTGAAACTGAGGATTAGGAAGGTGTA	TGTGAGGTTGGCATTGTTGTCT		1.04063		1
mir-1296	ACCTACCTAACTGGGTTAGGGCCCTGGCTCCATCTCCTTTAGGAAAACCTTCTGTGGGGAGTGGGGCTTCGACCCTAACCCAGGTGGGCTGT	TTAGGGCCCTGGCTCCATCTCC		9.73734		1
mir-1301	GGATTGTGGGGGGTCGCTCTAGGCACCGCAGCACTGTGCTGGGGATGTTGCAGCTGCCTGGGAGTGACTTCACACAGTCCTC		TTGCAGCTGCCTGGGAGTGACTTC		30.9469	1
mir-1304	TAATCCCTTGAGCCCAGTGGTTCGAGGCTACAATGAGATGTGATCCTGCCACATCTCACTGTAGCCTCAAACCCTTGGGCTCAAGCGATTCAGCAAGAATCACACGATTTTC	TTCGAGGCTACAATGAGATGTG		37.3911		1
mir-1306	CCACCTCCCCTGCAAACGTCCAGTGGTGCAGAGGTAATGGACGTTGGCTCTGGTGGTG	CCACCTCCCCTGCAAACGTCC	ACGTTGGCTCTGGTGGTG	4.78414	7.84132	1
mir-1307	CATCAAGACCCAGCTGAGTCACTGTCACTGCCTACCAATCTCGACCGGACCTCGACCGGCTCGTCTGTGTTGCCAATCGACTCGGCGTGGCGTCGGTCGTGGTAGATAGGCGGTCATGCATACGAATTTTCAGCTCTTGTTCTGGTGAC	TCGACCGGACCTCGACCGGCT	ACTCGGCGTGGCGTCGGTCGTG	1.02459	543.868	1
mir-130a	TGCTGCTGGCCAGAGCTCTTTTCACATTGTGCTACTGTCTGCACCTGTCACTAGCAGTGCAATGTTAAAAGGGCATTGGCC		CAGTGCAATGTTAAAAGGGC		60.039	1
mir-130b	GGCCTGCCCGACACTCTTTCCCTGTTGCACTACTATAGGCCGCTGGGAAGCAGTGCAATGATGAAAGGGCATCGGTCAGGTC	ACTCTTTCCCTGTTGCACTAC	CAGTGCAATGATGAAAGGGCAT	106.256	6.06781	1
mir-132	CCGCCCCCGCGTCTCCAGGGCAACCGTGGCTTTCGATTGTTACTGTGGGAACTGGAGGTAACAGTCTACAGCCATGGTCGCCCCGCAGCACGCCCACGCGC	ACCGTGGCTTTCGATTGTTACT	TAACAGTCTACAGCCATGGTCG	14.3242	4.72591	1
mir-1327	GACTGCTCTTTAAAAGGCTGTTAAATGGTGATACTATATTTTTTAACATCAGCATCATTTAGAAACCTTTTAGAGAACAGTTC	TAAAAGGCTGTTAAATGGTGAT		1.08476		1
mir-134	CAGGGTGTGTGACTGGTTGACCAGAGGGGCGTGCACTGTGTTCACCCTGTGGGCCACCTAGTCACCAACCCTC	TGTGACTGGTTGACCAGAGGGG		128.385		1
mir-135a-1	AGGCCTCGCTGTTCTCTATGGCTTTTTATTCCTATGTGATTCTACTGCTCACTCATATAGGGATTGGAGCCGTGGCGCACGGCGGGGACA	TATGGCTTTTTATTCCTATGTGA	ATATAGGGATTGGAGCCGTGGC	1.04481	0.602977	3
mir-136	TGAGCCCTCGGAGGACTCCATTTGTTTTGATGATGGATTCTTATGCTCCATCATCGTCTCAAATGAGTCTTCAGAGGGTTCT	ACTCCATTTGTTTTGATGATGGA	CATCATCGTCTCAAATGAGTCT	22.3783	20.7153	1
mir-138	CGTTGCTGCAGCTGGTGTTGTGAATCAGGCCGACGAGCAGCGCATCCTCTTACCCGGCTATTTCACGACACCAGGGTTGCATCA	AGCTGGTGTTGTGAATCAGGCCG		6.07816		1
mir-138-1	CCCTGGCATGGTGTGGTGGGGCAGCTGGTGTTGTGAATCAGGCCGTTGCCAATCAGAGAACGGCTACTTCACAACACCAGGGCCACACCACACTACAGG	AGCTGGTGTTGTGAATCAGGCCG		2.20416		1
mir-139	GTGTATTCTACAGTGCACGTGTCTCCAGTGTGGCTCGGAGGCTGGAGACGCGGCCCTGTTGGAGTAAC	TCTACAGTGCACGTGTCTCCAGT	GGAGACGCGGCCCTGTTGGAGT	155.369	49.1717	1
mir-140	TGTGTCTCTCTCTGTGTCCTGCCAGTGGTTTTACCCTATGGTAGGTTACGTCATGCTGTTCTACCACAGGGTAGAACCACGGACAGGATACCGGGGCACC	CAGTGGTTTTACCCTATGGTAG	TACCACAGGGTAGAACCACGG	1057.94	15255.5	1
mir-141	TGGCCGGCCCTGGGTCCATCTTCCAGTACAGTGTTGGATGGTCTAATTGTGAAGCTCCTAACACTGTCTGGTAAAGATGGCCCCCGGGTCGGTTT		AACACTGTCTGGTAAAGATGG		6.6375	1
mir-142	GACAGTGCAGTCACCCATAAAGTAGAAAGCACTACTAACAGCACTGGAGGGTGTAGTGTTTCCTACTTTATGGATGAGTGTACTGTG	CATAAAGTAGAAAGCACTACT	TGTAGTGTTTCCTACTTTATGGA	8908.16	4904.69	1
mir-143	GCGCAGCGCCCTGTCTCCCAGCCTGAGGTGCAGTGCTGCATCTCTGGTCAGTTGGGAGTCTGAGATGAAGCACTGTAGCTCAGGAAGAGAGAAGTTGTTCTGCAGC		TGAGATGAAGCACTGTAGCTC		229.561	1
mir-144	TGGGGCCCTGGCTGGGATATCATCATATACTGTAAGTTTGCGATGAGACACTACAGTATAGATGATGTACTAGTCCGGGCACCCCC	GGATATCATCATATACTGTAAG	TACAGTATAGATGATGTACT	756.966	1861.18	1
mir-145	CACCTTGTCCTCACGGTCCAGTTTTCCCAGGAATCCCTTAAATGCTAAGATGGGGATTCCTGGAAATACTGTTCTTGAGGTCATGGTT	GTCCAGTTTTCCCAGGAATCCCTT	GGATTCCTGGAAATACTGTTCT	1.99024	5.04199	1
mir-1468	CGGGCGGTTTCTCCGTTTGCCTGTTTTGCTGATGTACATTCAACTCATTCTCAGCAAAATAAGCAAATGGAAAATTTGTCCA	CTCCGTTTGCCTGTTTTGCTGA		3.86994		1
mir-146a	CCTATGTGTATCCTCAGCTTTGAGAACTGAATTCCATGGGTTGTGTCAGTGTCAGACCTGTGAAATTCAGTTCTTCAGCTGGGATATCTCTGTCGTCGT	TGAGAACTGAATTCCATGGGTT	CCTGTGAAATTCAGTTCTTCAG	2499.16	0.580737	1
mir-146b	CCTGGCACTGAGAACTGAATTCCATAGGCTGTGAGCTCTAGCAATGCCCTGTGGACTCAGTTCTGGTGCCCGG	TGAGAACTGAATTCCATAGGCT		9082.25		1
mir-147b	TATAAATCTAGTGGAAACATTTCCGCACAAACTAGATTCTGGACACCAGTGTGCGGAAGTGCTTCTGCTGCATTTTTAGG		GTGTGCGGAAGTGCTTCTGCT		3.04139	1
mir-148a	GAGGCAAAGTTCTGAGACACTCCGACTCTGAGTATGATAGAAGTCAGTGCACTACAGAACTTTGTCTC	AAAGTTCTGAGACACTCCGACT	TCAGTGCACTACAGAACTTTGT	126.17	78934.8	1
mir-148b	CAAGCACGATTAGCATTTGAGGTGAAGTTCTGTTATACACTCAGGCTGTGGCTCTCTGAAAGTCAGTGCATCACAGAACTTTGTCTCGAAAGCTTTCTA	AAGTTCTGTTATACACTCAGGC	TCAGTGCATCACAGAACTTTGT	37.0526	554.056	1
mir-149	GCCGGCGCCCGAGCTCTGGCTCCGTGTCTTCACTCCCGTGCTTGTCCGAGGAGGGAGGGAGGGACGGGGGCTGTGCTGGGGCAGCTGGA	TCTGGCTCCGTGTCTTCACTCCC		17.6917		1
mir-150	CTCCCCATGGCCCTGTCTCCCAACCCTTGTACCAGTGCTGGGCTCAGACCCTGGTACAGGCCTGGGGGACAGGGACCTGGGGAC	TCTCCCAACCCTTGTACCAGTG	CTGGTACAGGCCTGGGGGACA	7755.64	291.417	1
mir-151	TTTCCTGCCCTCGAGGAGCTCACAGTCTAGTATGTCTCATCCCCTACTAGACTGAAGCTCCTTGAGGACAGGGATGGTCATACTCACCTC	TCGAGGAGCTCACAGTCTAGT	CTAGACTGAAGCTCCTTGAGG	47.796	1946.97	1
mir-151b	ACCTCTGATGTGTCAGTCTCTCTTCAGGGCTCCCGAGACACAGAAACAGACACCTGCCCTCGAGGAGCTCACAGTCTAGACAAACAAACCCAGGGT		TCGAGGAGCTCACAGTCT		3.5035	1
mir-152	TGTCCCCCCCGGCCCAGGTTCTGTGATACACTCCGACTCGGGCTCTGGAGCAGTCAGTGCATGACAGAACTTGGGCCCGGAAGGACC		TCAGTGCATGACAGAACTTGG		79.4005	1
mir-153-1	CTCACAGCTGCCAGTGTCATTTTTGTGATCTGCAGCTAGTATTCTCACTCCAGTTGCATAGTCACAAAAGTGATCATTGGCAGGTGTGGC	TCATTTTTGTGATCTGCAGCT	TTGCATAGTCACAAAAGTGA	0.318027	0.26925	2
mir-154	GTGGTACTTGAAGATAGGTTATCCGTGTTGCCTTCGCTTTATTTGTGACGAATCATACACGGTTGACCTATTTTTCAGTACCAA	TAGGTTATCCGTGTTGCCTTCG	AATCATACACGGTTGACCTATT	1.32701	1.15503	1
mir-155	CTGTTAATGCTAATCGTGATAGGGGTTTTTGCCTCCAACTGACTCCTACATATTAGCATTAACAG	TTAATGCTAATCGTGATAGGGGT		2891.85		1
mir-15a	CCTTGGAGTAAAGTAGCAGCACATAATGGTTTGTGGATTTTGAAAAGGTGCAGGCCATATTGTGCTGCCTCAAAAATACAAGG	TAGCAGCACATAATGGTTTGTG	GCAGGCCATATTGTGCTGCCTCA	205.047	0.662317	1
mir-15b	TTGAGGCCTTAAAGTACTGTAGCAGCACATCATGGTTTACATACTACAGTCAAGATGCGAATCATTATTTGCTGCTCTAGAAATTTAAGGAAATTCAT	TAGCAGCACATCATGGTTTACA	CGAATCATTATTTGCTGCTCTA	326.548	80.5829	1
mir-16-1	GTCAGCAGTGCCTTAGCAGCACGTAAATATTGGCGTTAAGATTCTAAAATTATCTCCAGTATTAACTGTGCTGCTGAAGTAAGGTTGAC	TAGCAGCACGTAAATATTGGCG	CCAGTATTAACTGTGCTGCTGA	2885.58	8.19328	1
mir-16-2	GTTCCACTCTAGCAGCACGTAAATATTGGCGTAGTGAAATATGTATTAAACACCAATATTACTGTGCTGCTTCAGTGTGAC		CCAATATTACTGTGCTGCTTCA		2089.58	1
mir-17	GTCAGAATAATGTCAAAGTGCTTACAGTGCAGGTAGTGATATGTGCATCTACTGCAGTGAAGGCACTTGTAGCATTATGGTGAC	CAAAGTGCTTACAGTGCAGGTAG	ACTGCAGTGAAGGCACTTGT	745.195	40.8956	1
mir-181a-1	TGAGTTTTGAGGTTGCTTCAGTGAACATTCAACGCTGTCGGTGAGTTTGGAATTAAAATCAAAACCATCGACCGTTGATTGTACCCTATGGCTAACCATCATCTACTCCA	AACATTCAACGCTGTCGGTGAGT	ACCATCGACCGTTGATTGTACC	3631.15	74.9695	1
mir-181a-2	AGAAGGGCTATCAGGCCAGCCTTCAGAGGACTCCAAGGAACATTCAACGCTGTCGGTGAGTTTGGGATTTGAAAAAACCACTGACCGTTGACTGTACCTTGGGGTCCTTA		ACCACTGACCGTTGACTGTACC		244.862	1
mir-181b-1	CCTGTGCAGAGATTATTTTTTAAAAGGTCACAATCAACATTCATTGCTGTCGGTGGGTTGAACTGTGTAGACAAGCTCACTGAACAATGAATGCAACTGTGGCCCCGCTT	AACATTCATTGCTGTCGGTGGGTT	ACTGAACAATGAATGCAAC	814.036	2.01262	1
mir-181b-2	CTGATGGCTGCACTCAACATTCATTGCTGTCGGTGGGTTTGAGTCTGAATCAACTCACTGATCGATGAATGCAAACTGCGGACCAAACA		ACTGATCGATGAATGCAAA		1.32562	1
mir-181c	CGGAAAATTTGCCAAGGGTTTGGGGGAACATTCAACCTGTCGGTGAGTTTGGGCAGCTCAGGCAAACCATCGACCGTTGAGTGGACCCTGAGGCCTGGAATTGCCATCCT	AACATTCAACCTGTCGGTGAGT	CCATCGACCGTTGAGTGGACC	9.1726	12.631	1
mir-181d	GTCCCCTCCCCTAGGCCACAGCCGAGGTCACAATCAACATTCATTGTTGTCGGTGGGTTGTGAGGACTGAGGCCAGACCCACCGGGGGATGAATGTCACTGTGGCTGGGCCAGACACGGCTTAAGGGGAATGGGGAC	AACATTCATTGTTGTCGGTGGGT		66.4973		1
mir-182	GAGCTGCTTGCCTCCCCCCGTTTTTGGCAATGGTAGAACTCACACTGGTGAGGTAACAGGATCCGGTGGTTCTAGACTTGCCAACTATGGGGCGAGGACTCAGCCGGCAC	TTTGGCAATGGTAGAACTCACACT		52.9998		1
mir-183	CCGCAGAGTGTGACTCCTGTTCTGTGTATGGCACTGGTAGAATTCACTGTGAACAGTCTCAGTCAGTGAATTACCGAAGGGCCATAAACAGAGCAGAGACAGATCCACGA	TATGGCACTGGTAGAATTCACT		47.9412		1
mir-1839	CCTAAATGAAAAGGTAGATAGAACAGGTCTTGTTTGCAAAATAAACTCAAGGCCTACTTATCTACCAACAGCAATTATAT	AAGGTAGATAGAACAGGTCTTG	AAGGCCTACTTATCTACCAAC	249.113	1.84702	1
mir-1843	TACATAAACATATGGAGGTCTCTGTCTGGCTTAGGACAGCTGGCTAAGTCTGATCGTTCCCCTCCATACAACCTTTAAA	TATGGAGGTCTCTGTCTGGCT	TCTGATCGTTCCCCTCCATAC	33.8913	51.5992	1
mir-185	AGGGGGCGAGGGATTGGAGAGAAAGGCAGTTCCTGATGGTCCCCTCCCCAGGGGCTGGCTTTCCTCTGGTCCTTCCCTCCCA	TGGAGAGAAAGGCAGTTCCTGA	AGGGGCTGGCTTTCCTCTGGTC	1354.73	23.9707	1
mir-186	TGCTTGTAACTTTCCAAAGAATTCTCCTTTTGGGCTTTCTGGTTTTATTTTAAGCCCAAAGGTGAATTTCTTGGGAAGTTTGAGCT	CAAAGAATTCTCCTTTTGGGCT		783.166		1
mir-187	GGTCAGGCTCACTATGACACAGTGTGAGACCTCGGGCTACAACACAGGACCCGGGTGCTGCTCTGACCCCTCGTGTCTTGTGTTGCAGCCGGAGGGACGCAGGTCCGCA	GGCTACAACACAGGACCCGGG	TCGTGTCTTGTGTTGCAGCCGG	4.27976	70.9349	1
mir-188	TGCTCCCTCTCTCACATCCCTTGCATGGTGGAGGGTGAGCTTTCTGAAAACCCCTCCCACATGCAGGGTTTGCAGGATGGCGAGCC	CATCCCTTGCATGGTGGAGGG		9.18678		1
mir-18a	TGTTCTAAGGTGCATCTAGTGCAGATAGTGAAGTAGATTAGCATCTACTGCCCTAAGTGCTCCTTCTGGCA	TAAGGTGCATCTAGTGCAGATA	ACTGCCCTAAGTGCTCCTTCTGG	33.2024	7.11162	1
mir-18b	TGTGTTAAGGTGCATCTAGTGCAGTTAGTGAAGCAGCTTAGAATCTACTGCCCTAAATGCCCCTTCTGGCA	TAAGGTGCATCTAGTGCAGTTAG		0.914855		1
mir-190a	TGCAGGCCTCTGTGTGATATGTTTGATATATTAGGTTGTTATTTAATCCAACTATATATCAAACATATTCCTACAGTGTCTTGCC	TGATATGTTTGATATATTAGGT		13.2285		1
mir-190b	TGCTTCTGTGTGATATGTTTGATATTGGGTTGTTTAATTAGGAACCAACTAAATGTCAAACATATTCTTACAGCAGCTG	TGATATGTTTGATATTGGGTT		28.4435		1
mir-191	CGGCTGGACAGCGGGCAACGGAATCCCAAAAGCAGCTGTTGTCTCCAGAGCATTCCAGCTGCGCTTGGATTTCGTCCCCTGCTCTCCTGCCT	CAACGGAATCCCAAAAGCAGCTG	GCTGCGCTTGGATTTCGTCCCC	12824.4	12.8665	1
mir-192	GCCGAGACCGAGTGCACAGGGCTCTGACCTATGAATTGACAGCCAGTGCTCTCGTCTCCCCTCTGGCTGCCAATTCCATAGGTCACAGGTATGTTCGCCTCAATGCCAGC	CTGACCTATGAATTGACAGCC		137.54		1
mir-193a	CGAGGATGGGAGCTGAGGGCTGGGTCTTTGCGGGCGAGATGAGGGTGTCGGATCAACTGGCCTACAAAGTCCCAGTTCTCGGCCCCCG	TGGGTCTTTGCGGGCGAGATGA		1.395		1
mir-193b	GTGGTCTCAGAATCGGGGTTTTGAGGGCGAGATGAGTTTATGTTTTATCCAACTGGCCCTCAAAGTCCCGCTTTTGGGGTCAT	CGGGGTTTTGAGGGCGAGATGA	AACTGGCCCTCAAAGTCCCGCT	2.18813	0.322848	1
mir-194-1	ATGGTGTTATCAAGTGTAACAGCAACTCCATGTGGACTGTGTACCAATTTCCAGTGGAGATGCTGTTACTTTTGATGGTTACCAA	TGTAACAGCAACTCCATGTGGA		43.8753		1
mir-194-2	TGGTTCCCGCCCCCTGTAACAGCAACTCCATGTGGAAGTGCCCACTGGTTCCAGTGGGGCTGCTGTTATCTGGGGCGAGGGCCAG		CCAGTGGGGCTGCTGTTATCTG		0.643979	1
mir-195	AGCTTCCCTGGCTCTAGCAGCACAGAAATATTGGCACAGGGAAGCGAGTCTGCCAATATTGGCTGTGCTGCTCCAGGCAGGGTGGTG	TAGCAGCACAGAAATATTGGC	CCAATATTGGCTGTGCTGCTCC	1.59046	0.987351	1
mir-196a-1	GTGAATTAGGTAGTTTCATGTTGTTGGGCCTGGGTTTCTGAACACAACAACATTAAACCACCCGATTCAC	TAGGTAGTTTCATGTTGTTGG		106.921		2
mir-196b	ACTGGTCGGTGATTTAGGTAGTTTCCTGTTGTTGGGATCCACCTTTCTCTCGACAGCACGACACTGCCTTCATTACTTCAGTTG	TAGGTAGTTTCCTGTTGTTGGG		45.7127		1
mir-197	GGCTGTGCCGGGTAGAGAGGGCAGTGGGAGGTAAGAGCTCTTCACCCTTCACCACCTTCTCCACCCAGCATGGCC	CGGGTAGAGAGGGCAGTGGGAGG	TTCACCACCTTCTCCACCCAGC	1.65016	250.7	1
mir-1976	GAGGTGTGTCCTCCTGCCCTCCTTGCTGTAGACTTTGGCCTGAGCAAGGAGGCCATTGACCACGAGACTTTGGCCT	CTCCTGCCCTCCTTGCTGTAG		1.59713		1
mir-199a-1	GCCAACCCAGTGTTCAGACTACCTGTTCAGGAGGCTCTCAATGTGTACAGTAGTCTGCACATTGGTTAGGC	CCCAGTGTTCAGACTACCTGTTC	ACAGTAGTCTGCACATTGGTTA	51.4839	356.914	2
mir-199b	CCAGAGGACACCTCCACTCCGTCTACCCAGTGTTTAGACTATCTGTTCAGGACTCCCAAATTGTACAGTAGTCTGCACATTGGTTAGGCTGGGCTGGGTTAGACCCTCGG	CCCAGTGTTTAGACTATCTGTTC		230.724		1
mir-19a	GCAGTCCTCTGTTAGTTTTGCATAGTTGCACTACAAGAAGAATGTAGTTGTGCAAATCTATGCAAAACTGATGGTGGCCTGC		TGTGCAAATCTATGCAAAACTGA		125.349	1
mir-19b-1	CACTGTTCTATGGTTAGTTTTGCAGGTTTGCATCCAGCTGTGTGATATTCTGCTGTGCAAATCCATGCAAAACTGACTGTGGTAGTG		TGTGCAAATCCATGCAAAACTGA		373.302	2
mir-200a	CCGGGCCCCTGTGAGCATCTTACCGGACAGTGCTGGATTTCCCAGCTTGACTCTAACACTGTCTGGTAACGATGTTCAAAGGTGACCCGC	CATCTTACCGGACAGTGCTGGA	TAACACTGTCTGGTAACGATGT	1.01632	6.99826	1
mir-200b	CCAGCTCGGGCAGCCGTGGCCATCTTACTGGGCAGCATTGGATGGAGTCAGGTCTCTAATACTGCCTGGTAATGATGACGGCGGAGCCCTGCACG	CATCTTACTGGGCAGCATTGGA	TAATACTGCCTGGTAATGATGA	0.790593	13.7122	1
mir-200c	CCCTCGTCTTACCCAGCAGTGTTTGGGTGCGGTTGGGAGTCTCTAATACTGCCGGGTAATGATGGAGG		AATACTGCCGGGTAATGATGGA		179.11	1
mir-203a	GTGTTGGGGACTCGCGCGCTGGGTCCAGTGGTTCTTAACAGTTCAACAGTTCTGTAGCGCAATTGTGAAATGTTTAGGACCACTAGACCCGGCGGGCGCGGCGACAGCGA		GTGAAATGTTTAGGACCACTAG		1.90624	1
mir-204	TGCTTCCCGAGGCCACATGCTTCTTTATATCCCCATATGGATTACTTTGCTATGGAATGTAAGGAAGTGTGTGGTTTCGGCAAGTG	TTCCCTTTGTCATCCTATGCCT		1.51526		1
mir-206	TGCTTCCCGAGGCCACATGCTTCTTTATATCCCCATATGGATTACTTTGCTATGGAATGTAAGGAAGTGTGTGGTTTCGGCAAGTG		TGGAATGTAAGGAAGTGTGTGG		2.04014	1
mir-20a	CAGACGTGTCATCCCCAGATACAATGGACAATATGCTATTATAATCGTATGGCATTGTCCTTGCTGTTTGGAGATAATACTGCTGAC	TAAAGTGCTTATAGTGCAGGTA	ACTGCATTATGAGCACTTAAAGT	1263.1	5.48869	1
mir-20b	GGCTGTGGCTGGATTCAAGTAATCCAGGATAGGCTGTTTCCATCTGTGAGGCCTATTCTTGATTACTTGTTTCTGGAGGCAGCT	CAAAGTGCTCATAGTGCAGGTAG		17.935		1
mir-21	GCCGCAGGTGCTCTGACGAGGTTGCACTACTGTGCTCTGAGAAGCAGTGCAATGATATTGTCAAAGCATCTGGGACCA	TAGCTTATCAGACTGATGTTGA	CAACACCAGTCGATGGGCTGTC	84244.8	24.5182	1
mir-210	ACCCGGCAGTCCCTCCAGGCGCAGGGCAGCCCCTGCCCACCGCACACTGCGCTGCCCCAGACCCACTGTGCGTGTGACAGCGGCTGATCTGTGCCTGGGCAGCGCGACCC	AGCCCCTGCCCACCGCACACTG	CTGTGCGTGTGACAGCGGCTGA	1.09637	143.876	1
mir-211	TCACTGGCCATGTGACTTGTGGGCTTCCCTTTGTCATCCTTTGCCTAGGGCTCTGAGCAGGGCAGGGACAGCAAAGGGGTGCTCAGTTGTCACTTCCCACAGCACAGAG	TTCCCTTTGTCATCCTTTGCCT		0.380941		1
mir-212	CGGGGCACCCCGCCCGGACAGCGCGCCGGCACCTTGGCTCTAGACTGCTTACTGCCCGGGCCGCCCTCAGTAACAGTCTCCAGTCACGGCCACCGACGCCTGGCCCCGCC	ACCTTGGCTCTAGACTGCTTACT		0.887054		1
mir-214	GGCCTGGCTGGACAGAGTTGTCATGTGTCTGCCTGTCTACACTTGCTGTGCAGAACATCCGCTCACCTGTACAGCAGGCACAGACAGGCAGTCACATGACAACCCAGCCT		ACAGCAGGCACAGACAGGCAG		0.179888	1
mir-215	ATCATTAAGAAATGGTATACAGGAAAATGACCTATGAATTGACAGACACTATAGCTGAGTTTGTCTGTCATTTCTTTAGGCCAATATTCTGTATGACTGTGCTACTTCAA	ATGACCTATGAATTGACAGAC		2.92053		1
mir-219a-1	CCGCCCCGGGCCGCGGCTCCTGATTGTCCAAACGCAATTCTCGAGTCTATGGCTCCGGCCGAGAGTTGAGTCTGGACGTCCCGAGCCGCCGCCCCCAAACCTCGAGCGGG	TGATTGTCCAAACGCAATTCT	AGAGTTGAGTCTGGACGTCCCG	0.979613	9.1057	2
mir-219b	GGAGCTCAGCCACAGATGTCCAGCCACAATTCTCGGTTGGCCGCAGACTCGTACAAGAATTGCGTTTGGACAATCAGTGGCGAAGCCC	AGATGTCCAGCCACAATTCTCG		1.3311		1
mir-22	GGCTGAGCCGCAGTAGTTCTTCAGTGGCAAGCTTTATGTCCTGACCCAGCTAAAGCTGCCAGTTGAAGAACTGTTGCCCTCTGCC	AGTTCTTCAGTGGCAAGCTTTA	AAGCTGCCAGTTGAAGAACTGT	38.8871	3833.7	1
mir-221	TGAACATCCAGGTCTGGGGCATGAACCTGGCATACAATGTAGATTTCTGTGTTCGTTAGGCAACAGCTACATTGTCTGCTGGGTTTCAGGCTACCTGGAAACATGTTCTC	ACCTGGCATACAATGTAGATTT	AGCTACATTGTCTGCTGGGTTTC	53.2594	875.545	1
mir-222	GCTGCTGGAAGGTATAGGTACCCTCAATGGCTCAGTAGCCAGTGTAGATCCTGTCTTTCGTAATCAGCAGCTACATCTGGCTACTGGGTCTCTGATGGCATCTTCTAGCT	CAGTAGCCAGTGTAGATCC	AGCTACATCTGGCTACTGGGT	0.524614	1023.43	1
mir-223	CCTGGCCTCCTGCAGTGCCACGCTCCGTGTATTTGACAAGCTGAGTTGGACACTCCATGTGGTAGAGTGTCAGTTTGTCAAATACCCCAAGTGCGGCACATGCTTACCAG	CGTGTATTTGACAAGCTGAGTT	TGTCAGTTTGTCAAATACCCCA	877.258	3662.17	1
mir-2355	CAGACGTGTCATCCCCAGATACAATGGACAATATGCTATTATAATCGTATGGCATTGTCCTTGCTGTTTGGAGATAATACTGCTGAC		ATTGTCCTTGCTGTTTGGAGAT		10.1068	1
mir-23a	GGCCGGCTGGGGTTCCTGGGGATGGGATTTGCTTCCTGTCACAAATCACATTGCCAGGGATTTCCAACCGACC	GGTTCCTGGGGATGGGATTT	ATCACATTGCCAGGGATTTCC	16.4308	1284.04	1
mir-23b	CTCAGGTGCTCTGGCTGCTTGGGTTCCTGGCATGCTGATTTGTGACTTAAGATTAAAATCACATTGCCAGGGATTACCACGCAACCACGACCTTGGC	TGGGTTCCTGGCATGCTGATTT	ATCACATTGCCAGGGATTACC	11.2024	112.469	1
mir-24-1	CTCCGGTGCCTACTGAGCTGATATCAGTTCTCATTTTACACACTGGCTCAGTTCAGCAGGAACAGGAG	TGCCTACTGAGCTGATATCAGT	TGGCTCAGTTCAGCAGGAACAG	9.51378	7142.55	1
mir-24-2	CTCTGCCTCCCGTGCCTACTGAGCTGAAACACAGTTGGTTTGTGTACACTGGCTCAGTTCAGCAGGAACAGGG	TGCCTACTGAGCTGAAACACAG		282.624		1
mir-25	GGCCAGTGTTGAGAGGCGGAGACTTGGGCAATTGCTGGACGCTGCCCTGGGCATTGCACTTGTCTCGGTCTGACAGTGCCGGCC	AGGCGGAGACTTGGGCAATTG	CATTGCACTTGTCTCGGTCTGA	35.7748	3289.85	1
mir-26a-1	GTGGCCTCGTTCAAGTAATCCAGGATAGGCTGTGCAGGTCCCAATGGGCCTATTCTTGGTTACTTGCACGGGGACGC	TTCAAGTAATCCAGGATAGGCT	CCTATTCTTGGTTACTTGCACG	39245	0.610687	1
mir-26a-2	GGCTGTGGCTGGATTCAAGTAATCCAGGATAGGCTGTTTCCATCTGTGAGGCCTATTCTTGATTACTTGTTTCTGGAGGCAGCT		CCTATTCTTGATTACTTGTTTC		3.35477	1
mir-26b	CCGGGACCCAGTTCAAGTAATTCAGGATAGGTTGTGTGCTGTCCAGCCTGTTCTCCATTACTTGGCTCGGGGACCGG	TTCAAGTAATTCAGGATAGGT	CCTGTTCTCCATTACTTGGCT	8048.94	13.6404	1
mir-27a	CTGAGGAGCAGGGCTTAGCTGCTTGTGAGCAGGGTCCACACCAAGTCGTGTTCACAGTGGCTAAGTTCCGCCCCCCAG	AGGGCTTAGCTGCTTGTGAGCA	TTCACAGTGGCTAAGTTCCGC	361.199	2882.25	1
mir-27b	ACCTCTCTAACAAGGTGCAGAGCTTAGCTGATTGGTGAACAGTGATTGGTTTCCGCTTTGTTCACAGTGGCTAAGTTCTGCACCTGAAGAGAAGGTG	AGAGCTTAGCTGATTGGTGAACA	TTCACAGTGGCTAAGTTCTGC	13.0622	1460.5	1
mir-28	GGTCCTTGCCCTCAAGGAGCTCACAGTCTATTGAGTTTCCTTTGTGACTTTCCCACTAGATTGTGAGCTCCTGGAGGGCAGGCACT	AAGGAGCTCACAGTCTATTGAG	CACTAGATTGTGAGCTCCTGGA	312.23	391.056	1
mir-296	AGGACCCTTCCAGAGGGCCCCCCCTCAATCCTGTTGTGCCTAATTCAGAGGGTTGGGTGGAGGCTCTCCTGAAGGGCTCT	AGGGCCCCCCCTCAATCCTGT	GAGGGTTGGGTGGAGGCTCTCC	16.3235	13.6643	1
mir-299	AAGAAATGGTTTACCGTCCCACATACATTTTCAATATGTATGTGGGACGGTAAACCGCTTCTT	TGGTTTACCGTCCCACATACAT	TATGTGGGACGGTAAACCGCTT	3.76723	34.9993	1
mir-29a	ATGACTGATTTCTTTTGGTGTTCAGAGTCAATATAATTTTCTAGCACCATCTGAAATCGGTTAT	CTGATTTCTTTTGGTGTTCAGA	CTAGCACCATCTGAAATCGGTT	0.523465	3242.67	1
mir-29b-1	CTTCAGGAAGCTGGTTTCATATGGTGGTTTAGATTTAAATAGTGATTGTCTAGCACCATTTGAAATCAGTGTTCTTGGGGG	AGCTGGTTTCATATGGTGGTTTAGA	TAGCACCATTTGAAATCAGTGTT	4.53544	167.214	1
mir-29b-2	CTTCTGGAAGCTGGTTTCACATGGTGGCTTAGATTTTTCCATCTTTGTATCTAGCACCATTTGAAATCAGTGTTTTAGGAG	CTGGTTTCACATGGTGGCTTAG		10.0555		1
mir-29c	ATCTCTTACACAGGCTGACCGATTTCTCCTGGTGTTCAGAGTCTGTTTTTGTCTAGCACCATTTGAAATCGGTTATGATGTAGGGGGA	TGACCGATTTCTCCTGGTGTTC	TAGCACCATTTGAAATCGGTTA	20.9217	350.919	1
mir-301a	ACTGCTAACGAATGCTCTGACTTTATTGCACTACTGTACTTTACAGCTAGCAGTGCAATAGTATTGTCAAAGCATCTGAAAGCAGG	TCTGACTTTATTGCACTACT	CAGTGCAATAGTATTGTCAAAGC	9.2153	6.6565	1
mir-301b	GCCGCAGGTGCTCTGACGAGGTTGCACTACTGTGCTCTGAGAAGCAGTGCAATGATATTGTCAAAGCATCTGGGACCA		CAGTGCAATGATATTGTCAAAGC		1.01185	1
mir-3064	GGTCTGGCTGTTGTGGTGTGCAAAACTCCGTACATTGCTATTTTGCCACACTGCAACACCTTACAG	TCTGGCTGTTGTGGTGTGCAA		4.2016		1
mir-3074	GCTCGACTCCTGTTCCTGCTGAACTGAGCCAGTGTGTAAAATGAGAACTGATATCAGCTCAGTAGGCACCGGAGGGCGGGT	GTTCCTGCTGAACTGAGCCAG		11.1961		2
mir-30a	GCGACTGTAAACATCCTCGACTGGAAGCTGTGAAGCCATAGATGGGCTTTCAGTCGGATGTTTGCAGCTGC	TGTAAACATCCTCGACTGGAAG	CTTTCAGTCGGATGTTTGCAGC	210.418	18.6837	1
mir-30b	ACCAAGTTTCAGTTCATGTAAACATCCTACACTCAGCTGTAATACATGGATTGGCTGGGAGGTGGATGTTTACTTCAGCTGACTTGGA	TGTAAACATCCTACACTCAGC	CTGGGAGGTGGATGTTTACTTC	230.782	12.5673	1
mir-30c-1	ACCATGCTGTAGTGTGTGTAAACATCCTACACTCTCAGCTGTGAGCTCAAGGTGGCTGGGAGAGGGTTGTTTACTCCTTCTGCCATGGA	TGTAAACATCCTACACTCTCAGC	CTGGGAGAGGGTTGTTTACTCC	2297.71	9.82097	1
mir-30c-2	AGATACTGTAAACATCCTACACTCTCAGCTGTGGAAAGTAAGAAAGCTGGGAGAAGGCTGTTTACTCTCTCT		TGGGAGAAGGCTGTTTACTCT		3.13796	1
mir-30d	GTTGTTGTAAACATCCCCGACTGGAAGCTGTAAGACACAGCTAAGCTTTCAGTCAGATGTTTGCTGCTAC	TGTAAACATCCCCGACTGGAAG	CTTTCAGTCAGATGTTTGCTGC	15619.2	12.6897	1
mir-30e	GGGCAGTCTTTGCTACTGTAAACATCCTTGACTGGAAGCTGTAAGGTGTTCAGAGGAGCTTTCAGTCGGATGTTTACAGCGGCAGGCTGCCA	TGTAAACATCCTTGACTGGAAG	TTTCAGTCGGATGTTTACAGC	3875.85	1023.8	1
mir-31	GGAGAGGAGGCAAGATGCTGGCATAGCTGTTGAACTGGGAACCTGCTATGCCAACATATTGCCATCTTTCC	GGCAAGATGCTGGCATAGCTG		14.175		1
mir-3120	GTCATGTGACTGCCTGTCTGTGCCTGCTGTACAGGTGAGCGGATGTTCTGCACAGCAAGTGTAGACAGGCAGACACATGAC	CCTGTCTGTGCCTGCTGTACA	CACAGCAAGTGTAGACAGGCA	4.2995	9.52096	1
mir-3122	AAAAGTTACTGACCAGCTCTGTTGGGACAAGAGAACGGTCTTGTTTTGGAAGGAAGACCGTCGTTTTGTCCCAAGAGAGCTGGTAGCATGTTTCGGAAATCTGCAAGTTTC	GTTGGGACAAGAGAACGGTCT		5.23456		1
mir-3140	CCTCTTGAGGTACCTGAATTACCAAAAGCTTTATGTATTCTGAAGTTATTGAAAATAAGAGCTTTTGGGAATTCAGGTAGTTCAGGAGTG		AGCTTTTGGGAATTCAGGTAGT		8.35568	1
mir-3145	TGAAAGGAAAAAATGTATTCATATAAGGTCAACTCCAAACATTCAAAACGCATTGTTGAATGGAATTAGGTATTTTGAGTGTTTGGAATTGAACTTGTATGCACTGATACA		TATTTTGAGTGTTTGGAATTGA		0.219512	1
mir-3146	ACAGAGATACACGTTTTCTTTGCTAAGTCCTTTCTTTCTATCCTAGTATAACTTGAAGAATTCAAATAGTCATGCTAGAACAGAAAGAATGGGAGTTGGCAAGGGAAGAAGA		CATGCTAGAACAGAAAGAATGGG		3.27559	1
mir-3155a	TCCGGGCATCAGCTCCCACTGCAGAGGCTGGGGAGCCGGACAGCTCCCTTCCCAAGCTCTGCAGTGGGAACTGATGCCTGGAAC	GCTCCCACTGCAGAGGCTGG	CAAGCTCTGCAGTGGGAACTGA	0.439766	7.82783	1
mir-3158-1	ATTCAGGCCGGTCCTGCAGAGAGGAAGCCCTTCTGCTTACAGGTATTGGAAGGGCTTCCTCTCTGCAGGACCGGCCTGAAT		AAGGGCTTCCTCTCTGCAGGAC		14.7366	2
mir-3160-1	GGACCTGCCCTGGGCTTTCTAGTCTCAGCTCTCCTCCAGCTCAGCTGGTCAGGAGAGCTGAGACTAGAAAGCCCAGGGCAGGTTC		AGAGCTGAGACTAGAAAGCCCA		0.722365	2
mir-3164	TCTTGGAAACTGTGACTTTAAGGGAAATGACGCACAGCAGGCCCTGGAATCACGCCGTTTTGCTTGAAGTTGCAGTTTCCCAGGGC	TGTGACTTTAAGGGAAATGACG	CCGTTTTGCTTGAAGTTGCAGT	0.967484	0.560004	1
mir-3173	TCCCTGCCCTGCCTGTTTTCTCCTTTGTGATTTTATGAGAACAAAGGAGGAAATAGGCAGGCCAGGGA	TGCCCTGCCTGTTTTCTCCTTT	GAAGGAGGAAACAGGCAGGCCAG	5.81794	1.17139	1
mir-3174	CATTACCTGGTAGTGAGTTAGAAATGCAGAGCCCCGGGCTTCTCAGCAAACCTACTGGATCTGCATTTTAATTCACATGCATGGTAATGT	TAGTGAGTTAGAAATGCAGAGC		3.28358		1
mir-3191	GGGGTCACCTCTCTGGCCGTCTACCTTCCACACTGACAAGGGCCGTGGGGACGTAGCTGGCCAGACAGGTGACCCC		TGGGGACGTAGCTGGCCAGACAG		1.23887	1
mir-3198-1	GACTGTGCTCTCACTGTTCACCCAGCACTAGCAGTACCAGACGGTTCTGTGGAGTCCTGGGGAATGGAGAGAGCACAGTC		GTGGAGTCCTGGGGAATGGAGA		0.733977	1
mir-32	GGAGATATTGCACATTACTAAGTTGCATGTTGTCACGGCCTCAATGCAATTTAGTGTGTGTGATATTTTC	TATTGCACATTACTAAGTTGC	CAATTTAGTGTGTGTGATATTT	530.144	34.0755	1
mir-3200	AGAGAGACAAAGAAGGAGGTGGTCGAGGGAATCTGAGAAGGCGCACAAGGTTTGTGTCCAATACAGTCCACACCTTGCGCTACTCAGGTCTGCTCGTGCCCTCCCATGAT		CACCTTGCGCTACTCAGGTCTG		0.553981	1
mir-320a	GCTTCGCTCCCCTCCGCCTTCTCTTCCCGGTTCTTCCCGGAGTCGGGAAAAGCTGGGTTGAGAGGGCGAAAAAGGATGAGGT		AAAAGCTGGGTTGAGAGGGCGA		1426.4	1
mir-320b	GTTATTTTTAGTCTTCTACCTAAGAATTCTGTCTCTTAGGCTTTCTCTTCCCAGTTTTCCCAAAGTTGGGAAAAGCTGGGTTGAGAGGGCAAAAGGAAAAAGAAAAAAAA		AAAAGCTGGGTTGAGAGGGCAA		103.596	1
mir-320b-1	AATTAATCCCTCTCTTTCTAGTTCTTCCTAGAGTGAGGAAAAGCTGGGTTGAGAGGGCAAACAAATTAACTAATTAATT		AAAAGCTGGGTTGAGAGGGCAA		119.039	1
mir-320c-1	TTTGCATTAAAAATGAGGCCTTCTCTTCCCAGTTCTTCCCAGAGTCAGGAAAAGCTGGGTTGAGAGGGTAGAAAAAAAATGATGTAGG		AAAAGCTGGGTTGAGAGGGT		41.8835	1
mir-320d-1	TTCTCGTCCCAGTTCTTCCCAAAGTTGAGAAAAGCTGGGTTGAGAGGA		AAAAGCTGGGTTGAGAGGA		25.8611	2
mir-320e	ACCTCCATGGGGCTTTCTCTTCCCAGTTCTTCCTGGAGTCGGGGAAAAGCTGGGTTGAGAGGGTGAACAGAAAAAA		AAAAGCTGGGTTGAGAGGGTGA		2.08156	1
mir-323a	TTGGTACTTGGAGAGAGGTGGTCCGTGGCGCGTTCGCTTTATTTATGGCGCACATTACACGGTCGACCTCTTTGCAGTATCTAATC	AGGTGGTCCGTGGCGCGTTCGC	CACATTACACGGTCGACCTCT	0.69281	25.7502	1
mir-323b	TGGTACTCGGAGGGAGGTTGTCCGTGGTGAGTTCGCATTATTTAATGATGCCCAATACACGGTCGACCTCTTTTCGGTATCA		CCCAATACACGGTCGACCTCTT		19.2542	1
mir-324	CTGACTATGCCTCCCCGCATCCCCTAGGGCATTGGTGTAAAGCTGGAGACCCACTGCCCCAGGTGCTGCTGGGGGTTGTAGTC	CGCATCCCCTAGGGCATTGGTGT	ACTGCCCCAGGTGCTGCTGG	3.84341	0.481552	1
mir-326	CTCATCTGTCTGTTGGGCTGGAGGCAGGGCCTTTGTGAAGGCGGGTGGTGCTCAGATCGCCTCTGGGCCCTTCCTCCAGCCCCGAGGCGGATTCA		CCTCTGGGCCCTTCCTCCAG		7.37913	1
mir-328	TGGAGTGGGGGGGCAGGAGGGGCTCAGGGAGAAAGTGCATACAGCCCCTGGCCCTCTCTGCCCTTCCGTCCCCTG		CTGGCCCTCTCTGCCCTTCCGT		24.9713	1
mir-329-1	GTGGTACCTGAAGGGAGGTTTTCTGGGTTTCTGTTTCTTTAATGAGGATGAAACACACCTGGTTAACCTCTTTTCCAGTATCAA	GAGGTTTTCTGGGTTTCTGTTTC	AACACACCTGGTTAACCTCTTT	0.330371	3.11318	2
mir-330	CTTTGGCGATCACTGCCTCTCTGGGCCTGTGTCTTAGGCTCTGCAAGATCAACCGAGCAAAGCACACGGCCTGCAGAGAGGCAGCGCTCTGCCC	TCTCTGGGCCTGTGTCTTAGGC	GCAAAGCACACGGCCTGCAGAGA	17.2111	112.1	1
mir-331	GAGTTTGGTTTTGTTTGGGTTTGTTCTAGGTATGGTCCCAGGGATCCCAGATCAAACCAGGCCCCTGGGCCTATCCTAGAACCAACCTAAGCTC	CTAGGTATGGTCCCAGGGATCC	GCCCCTGGGCCTATCCTAGAA	44.0409	8.67502	1
mir-335	GAGCGGGGGTCAAGAGCAATAACGAAAAATGTTTGTCATAAACCGTTTTTCATTATTGCTCCTGACCTCCTCTCATTTGCTATATTCA	TCAAGAGCAATAACGAAAAATGT	TTTTTCATTATTGCTCCTGACC	5.22205	10.3949	1
mir-337	GTAGTCAGTAGTTGGGGGGTGGGAACGGCTTCATACAGGAGTTGATGCACAGTTATCCAGCTCCTATATGATGCCTTTCTTCATCCCCTTCAA	GAACGGCTTCATACAGGAGTT	CTCCTATATGATGCCTTTCTTC	1.83157	4.71274	1
mir-338	TCTCCAACAATATCCTGGTGCTGAGTGATGACTCAGGCGACTCCAGCATCAGTGATTTTGTTGAAGA	AACAATATCCTGGTGCTGAGTG	TCCAGCATCAGTGATTTTGTTG	240.28	15.3857	1
mir-339	CGGGGCGGCCGCTCTCCCTGTCCTCCAGGAGCTCACGTGTGCCTGCCTGTGAGCGCCTCGACGACAGAGCCGGCGCCTGCCCCAGTGTCTGCGC	TCCCTGTCCTCCAGGAGCTCACG	TGAGCGCCTCGACGACAGAGCCG	219.373	189.821	1
mir-33a	CTGTGGTGCATTGTAGTTGCATTGCATGTTCTGGTGGTACCCATGCAATGTTTCCACAGTGCATCACAG	GTGCATTGTAGTTGCATTGCA		11.9985		1
mir-340	TTGTACCTGGTGTGATTATAAAGCAATGAGACTGATTGTCATATGTCGTTTGTGGGATCCGTCTCAGTTACTTTATAGCCATACCTGGTATCTTA	TTATAAAGCAATGAGACTGATT	TCCGTCTCAGTTACTTTATAGCC	4740.58	622.62	1
mir-342	GAAACTGGGCTCAAGGTGAGGGGTGCTATCTGTGATTGAGGGACATGGTTAATGGAATTGTCTCACACAGAAATCGCACCCGTCACCTTGGCCTACTTA	AGGGGTGCTATCTGTGATTGA	TCTCACACAGAAATCGCACCCGT	642.233	156.422	1
mir-34a	GGCCAGCTGTGAGTGTTTCTTTGGCAGTGTCTTAGCTGGTTGTTGTGAGCAATAGTAAGGAAGCAATCAGCAAGTATACTGCCCTAGAAGTGCTACACATTGTGGGGCCT	TGGCAGTGTCTTAGCTGGTTGT		11.4357		1
mir-3609	GTAACAGTAACTTTTATTCTCATTTTCCTTTTCTCTACCTTGTAGAGAAGCAAAGTGATGAGTAATACTGGCTGGAGCCC		CAAAGTGATGAGTAATACTGGCTG		1.37682	1
mir-361	GGAGCTTATCAGAATCTCCAGGGGTACTTTATAATTTCAAAAAGTCCCCCAGGTGTGATTCTGATTTGCTTC	TTATCAGAATCTCCAGGGGTAC	TCCCCCAGGTGTGATTCTGATTT	232.496	1023.49	1
mir-3613	TGGTTGGGTTTGGATTGTTGTACTTTTTTTTTTGTTCGTTGCATTTTTAGGAACAAAAAAAAAAGCCCAACCCTTCACACCACTTCA	TGTTGTACTTTTTTTTTTGTTC		115.7		1
mir-3614	GGTTCTGTCTTGGGCCACTTGGATCTGAAGGCTGCCCCTTTGCTCTCTGGGGTAGCCTTCAGATCTTGGTGTTTTGAATTCTTACT	CCACTTGGATCTGAAGGCTGCCC		1.85487		1
mir-362	CTCGAATCCTTGGAACCTAGGTGTGAGTGCTATTTCAGTGCAACACACCTATTCAAGGATTCAAA	AATCCTTGGAACCTAGGTGTGAGT	AACACACCTATTCAAGGATTCA	90.5081	4.92155	1
mir-3620	GTGAGGTGGGGGCCAGCAGGGAGTGGGCTGGGCTGGGCTGGGCCAAGGTACAAGGCCTCACCCTGCATCCCGCACCCAG	GTGGGCTGGGCTGGGCTGGGCC		0.81128		1
mir-363	TGTTGTCGGGTGGATCACGATGCAATTTTGATTAGTATCATAGGAGAAAAATTGCACGGTATCCATCTGTAAACC	CGGGTGGATCACGATGCAATTTT	AATTGCACGGTATCCATCTGTA	2.54032	237.975	1
mir-365-1	ACCGCAGGGAAAATGAGGGACTTTTGGGGGCAGATGTGTTTCCATTCCACTATCATAATGCCCCTAAAAATCCTTATTGCTCTTGCA		TAATGCCCCTAAAAATCCTTAT		0.398906	2
mir-369	TTGAAGGGAGATCGACCGTGTTATATTCGCTTTATTGACTTCGAATAATACATGGTTGATCTTTTCTCAG	AGATCGACCGTGTTATATTCGC	AATAATACATGGTTGATCTTT	49.605	21.0184	1
mir-3691	TTGAGGCACTGGGTAGTGGATGATGGAGACTCGGTACCCACTGCTGAGGGTGGGGACCAAGTCTGCGTCATCCTCTCCTCAGTGCCTCAA	AGTGGATGATGGAGACTCGGTAC		0.892532		1
mir-370	AGACAGAGAAGCCAGGTCACGTCTCTGCAGTTACACAGCTCATGAGTGCCTGCTGGGGTGGAACCTGGTCTGTCT	CAGGTCACGTCTCTGCAGTTAC	GCCTGCTGGGGTGGAACCTGGT	0.74853	923.051	1
mir-371	GTGGCACTCAAACTGTGGGGGCACTTTCTGCTCTCTGGTGAAAAAAGTGCCGCCATGTTTTGAGTGTTAC	ACTCAAACTGTGGGGGCACT		4.43855		1
mir-371b	AATCGGTAACACTCAAAACATGGCGGCACTTTTTTCACCAGAGAGCAGAAAGTGCCCCCACAGTTTGAGTGCCACAGGCTGAGG	ACTCAAAACATGGCGGCACTT		1.37793		1
mir-372	GTGGGCCTCAAATGTGGAGCACTATTCTGATGTCCAAGTGGAAAGTGCTGCGACATTTGAGCGTCAC		AAAGTGCTGCGACATTTGAGCGT		71.6018	1
mir-373	GGGATACTCAAAATGGGGGCGCTTTCCTTTTTGTCTGTACTGGGAAGTGCTTCGATTTTGGGGTGTCCC		GAAGTGCTTCGATTTTGGGGTGT		1.70975	1
mir-374a	TACATCGGCCATTATAATACAACCTGATAAGTGTTATAGCACTTATCAGATTGTATTGTAATTGTCTGTGTA	TTATAATACAACCTGATAAGTG	CTTATCAGATTGTATTGTAATT	494.578	62.6036	1
mir-374b	ACTCGGATGGATATAATACAACCTGCTAAGTGTCCTAGCACTTAGCAGGTTGTATTATCATTGTCCGTGTCT	ATATAATACAACCTGCTAAGTG	TTAGCAGGTTGTATTATCATT	241.72	5.4233	1
mir-375	CCCCGCGACGAGCCCCTCGCACAAACCGGACCTGAGCGTTTTGTTCGTTCGGCTCGCGTGAGGC		TTTGTTCGTTCGGCTCGCGTGA		87.1381	1
mir-376a-1	TAAAAGGTAGATTCTCCTTCTATGAGTACATTATTTATGATTAATCATAGAGGAAAATCCACGTTTTC		ATCATAGAGGAAAATCCACGT		1.87058	2
mir-376b	CAGTCCTTCTTTGGTATTTAAAACGTGGATATTCCTTCTATGTTTACGTGATTCCTGGTTAATCATAGAGGAAAATCCATGTTTTCAGTATCAAATGCTG		ATCATAGAGGAAAATCCATGTT		1.98678	1
mir-376c	AAAAGGTGGATATTCCTTCTATGTTTATGTTATTTATGGTTAAACATAGAGGAAATTCCACGTTTT		AACATAGAGGAAATTCCACGT		6.47342	1
mir-377	TTGAGCAGAGGTTGCCCTTGGTGAATTCGCTTTATTTATGTTGAATCACACAAAGGCAACTTTTGTTTG	AGAGGTTGCCCTTGGTGAATTC	ATCACACAAAGGCAACTTTTGT	0.644636	11.3165	1
mir-378a	AGGGCTCCTGACTCCAGGTCCTGTGTGTTACCTAGAAATAGCACTGGACTTGGAGTCAGAAGGCCT	CTCCTGACTCCAGGTCCTGTGT	ACTGGACTTGGAGTCAGAAGGC	31.4424	792.923	1
mir-378c	not found	ACTGGACTTGGAGTCAGAAGAGTGG		77.2355
mir-378d	GCACTTGGCCCAGAGTTCACACTCAGGGCTCATTGCTGCCATTGTTTCTGTCTTCGTTCCTGTTGTTATTACTGGACTTGGAGTCAGAAGCAGGTTCGAATCCCAACTCCAC		ACTGGACTTGGAGTCAGAAGCA		59.6867	1
mir-378g	CACTGGGCTTGGAGTCAGAAGACCTGGCTCCAGCCCAGCTC	ACTGGGCTTGGAGTCAGAAG		0.404099		1
mir-379	AGAGATGGTAGACTATGGAACGTAGGCGTTATGATTTTTGACCTATGTAACATGGTCCACTAACTCT	TGGTAGACTATGGAACGTAGG	TATGTAACATGGTCCACTAAC	390.254	7.57759	1
mir-380	AAGATGGTTGACCATAGAACATGCGCTATCTCTGTGTCGTATGTAATATGGTCCACATCTT	TGGTTGACCATAGAACATGCGC	TATGTAATATGGTCCACGTCTT	1.07563	4.26592	1
mir-381	TACTTAAAGCGAGGTTGCCCTTTGTATATTCGGTTTATTGACATGGAATATACAAGGGCAAGCTCTCTGTGAGTA		TATACAAGGGCAAGCTCTCTGT		630.807	1
mir-382	TACTTGAAGAGAAGTTGTTCGTGGTGGATTCGCTTTACTTATGACGAATCATTCACGGACAACACTTTTTTCAGTA	GAAGTTGTTCGTGGTGGATTCG	AATCATTCACGGACAACACTT	178.49	24.869	1
mir-383	not found	AGATCAGAAGGTGATTGTGGCT		4.74432
mir-3913-1	AACTGAAATATTTGGGACTGATCTTGACACTCTTACATAAAATGTTTTGGCAGACATCAAGATCAGTCCCAAATATTTCAGTTT	TTTGGGACTGATCTTGACACTCT		8.91258		1
mir-409	TGGTACTCGGGGAGAGGTTACCCGAGCAACTTTGCATCTGGACGACGAATGTTGCTCGGTGAACCCCTTTTCGGTATCA	AGGTTACCCGAGCAACTTTGCAT	GAATGTTGCTCGGTGAACCCCT	17.5168	902.484	1
mir-410	GGTACCTGAGGAGAGGTTGTCTGTGATGAGTTCGCTTTTATTAATGACGAATATAACACAGATGGCCTGTTTTCAGTACC		AATATAACACAGATGGCCTGT		17.0328	1
mir-411	TGGTACTTGGAGAGATAGTAGACCGTATAGCGTACGCTTTATCTGTGACGTATGTAACACGGTCCACTAACCCTCAGTATCA	TAGTAGACCGTATAGCGTACG	TATGTAACACGGTCCACTAACC	104.735	55.0529	1
mir-412	CTGGGGTACGGGGATGGATGGTCGACCAGTTGGAAAGTAATTGTTTCTAATGTACTTCACCTGGTCCACTAGCCGTCCGTATCCGCTGCAG	TGGTCGACCAGTTGGAAAGTAAT	ACTTCACCTGGTCCACTAGCCGT	2.59176	0.265903	1
mir-421	GCACATTGTAGGCCTCATTAAATGTTTGTTGAATGAAAAAATGAATCATCAACAGACATTAATTGGGCGCCTGCTCTGTGATCTC		ATCAACAGACATTAATTGGGCGC		51.8233	1
mir-423	ATAAAGGAAGTTAGGCTGAGGGGCAGAGAGCGAGACTTTTCTATTTTCCAAAAGCTCGGTCTGAGGCCCCTCAGTCTTGCTTCCTAACCCGCGC	TGAGGGGCAGAGAGCGAGACTTT	AGCTCGGTCTGAGGCCCCTCAGT	4951.9	3565.59	1
mir-424	CGAGGGGATACAGCAGCAATTCATGTTTTGAAGTGTTCTAAATGGTTCAAAACGTGAGGCGCTGCTATACCCCCTCGTGGGGAAGGTAGAAGGTGGGG	CAGCAGCAATTCATGTTTTGAA	CAAAACGTGAGGCGCTGCTAT	321.154	312.56	1
mir-425	GAAAGCGCTTTGGAATGACACGATCACTCCCGTTGAGTGGGCACCCGAGAAGCCATCGGGAATGTCGTGTCCGCCCAGTGCTCTTTC	AATGACACGATCACTCCCGTTGA	ATCGGGAATGTCGTGTCCGCCC	950.61	55.2148	1
mir-429	CGCCGGCCGATGAGCGTCTTACCAGACACGGTTAGACCTGGCTCTCTGTCTAATACTGTCTGGTAAAACCGTCCATCCGCGGC		TAATACTGTCTGGTAAAACCGT		2.9136	1
mir-431	TCCTGCTTGTCCTGCGAGGTGTCTTGCAGGCCGTCATGCAGGCCACACTGACGGTAACGTTGCAGGTCGTCTTGCAGGGCTTCTCGCAAGACGACATCCTCATCACCAACGACG	TGTCTTGCAGGCCGTCATGCA	CAGGTCGTCTTGCAGGGCTTCT	7.19194	1.52725	1
mir-432	TGACTCCTCCAGGTCTTGGAGTAGGTCATTGGGTGGATCCTCTATTTCCTTACGTGGGCCACTGGATGGCTCCTCCATGTCTTGGAGTAGATCA	TCTTGGAGTAGGTCATTGGGTGG		111.484		1
mir-433	CCAGGGAGAAGTACGGTGAGCCTGTCATTATTCAGAGAGGCTAGATCCTCTGTGTTGAGAAGGATCATGATGGGCTCCTCGGTGTTCTCCAGG		ATCATGATGGGCTCCTCGGTGT		55.2087	1
mir-4446	TACTTCAGGATTGATGAGTCCGGTGGCTCTGGTCCATTTCCCTGCCATTCCCTTGGCTTCAATTTACTCCCAGGGCTGGCAGTGAGATGGGTCAAGGCTCACACCTTCAC		CAGGGCTGGCAGTGAGATGGG		188.52	1
mir-4485	AGAGGCACCGCCTGCCCAGTGACATGCGTTTAACGGCCGCGGTACCCTAACTGTGCA		TAACGGCCGCGGTACCCTAA		0.380777	1
mir-449a	CTGTGTGTGATGAGCTGGCAGTGTATTGTTAGCTGGTTGAATATGTGAATGGCATCAGCTAACATGCAACTGCTGTCTTATTGCATATACA	TGGCAGTGTATTGTTAGCTGGT		1.81744		2
mir-450a-1	AAATGATACTAAACTGTTTTTGCGATGTGTTCCTAATATGTACTATAAATATATTGGGAACATTTTGCATGTGTAGTTTTGTATCAATATA	TTTTGCGATGTGTTCCTAATAT	ATTGGGAACATTTTGCATGTGT	64.7369	6.9669	1
mir-450a-2	CCAAAGAAAGATGCTAAACTATTTTTGCGATGTGTTCCTAATATGTAATATAAATGTATTGGGGACATTTTGCATTCATAGTTTTGTATCAATAATATGG		ATTGGGGACATTTTGCATTCAT		2.02997	1
mir-450b	GCAGAATTATTTTTGCAATATGTTCCTGAATATGTAATATAAGTGTATTGGGATCATTTTGCATCCATAGTTTTGTAT	TTTTGCAATATGTTCCTGAATA	TTGGGATCATTTTGCATCCATA	137.379	0.304288	1
mir-451	CTTGGGAATGGCAAGGAAACCGTTACCATTACTGAGTTTAGTAATGGTAAGGGTTCTCTTGCTATATCCAGA	AAACCGTTACCATTACTGAGTT		13348.6		1
mir-4536	not found		TGTGGTAGATATATGCACGA		0.461177
mir-454	TCTGTTTATCACCAGATCCTAGAACCCTATCAATATTGTCTCTGCTGTGTAAATAGTTCTGAGTAGTGCAATATTGCTTATAGGGTTTTGGTGTTTGGAAAGAACAATGGGCAGG	ACCCTATCAATATTGTCTCTGC	TAGTGCAATATTGCTTATAGGGT	11.8382	44.3983	1
mir-455	TCCCTGGCGTGAGGGTATGTGCCTTTGGACTACATCGTGGAAGCCAGCACCATGCAGTCCATGGGCATATACACTTGCCTCAAGGCCTATGTCATC	TATGTGCCTTTGGACTACATCG	GCAGTCCATGGGCATATACAC	4.59349	0.489515	1
mir-4659a	AGAAACTGATGAAGCTGCCATGTCTAAGAAGAAAACTTTGGAGAAAAATTTTCTTCTTAGACATGGCAGCGTCAACAGTTTC		TTTCTTCTTAGACATGGCAGCG		0.934243	1
mir-4661	ATTTACTCTGAACTAGCTCTGCGGATCCTGATAGACAGCCTGATAGACAGTATCCACAGAGCTAGTCCAGAGTAAAA	AACTAGCTCTGCGGATCCTGAT		0.754198		1
mir-4667	TGACTGGGGAGCAGAAGGAGAACCCAAGAAAAGCTGACTTGGAGGTCCCTCCTTCTGTCCCCACAG	ACTGGGGAGCAGAAGGAGAACC		0.412846		1
mir-4676	TGAATGAAAGAGCCAGTGGTGAGACAGTGAGTTGATTACTTCTCACTGTTTCACCACTGGCTCTTTGGTTCA	GAGCCAGTGGTGAGACAGTGA		16.7961		1
mir-4677	TTGTTCTTTGGTCTTTCAGCCATGACCTGACCTTCTGTCTGTGAGACCAAAGAACTACT	TTGTTCTTTGGTCTTTCAGCCA	TCTGTGAGACCAAAGAACTACT	0.320072	2.99382	1
mir-4684	GCACCAGGGGTACCTCTCTACTGACTTGCAACATACATTTGTATTGGTGTGTTGCAAGTCAGTGGAGAGGTACCCTTGGTG	CTCTCTACTGACTTGCAACATA	TGTTGCAAGTCAGTGGAGAGGT	0.710162	0.560004	1
mir-4766	TCTGAAAGAGCAGTTGGTGTTTATTTTTTACTAAACAGCAATCGCTCTTTTGGAAG		ACAGCAATCGCTCTTTTGGAAG		1.00776	1
mir-4791	TAAGAACTGGATATGATGACTGAAATAAGCTCCATATCAATGAGAATTTCAATGGGATTATGTGCAGTCAATGTCCAGTAATTA	TGGATATGATGACTGAAA		0.63474		1
mir-4796	GGCTCAAGTCATGGCAGTAAATTTGTGTCTATACTCTGCCACTTTACTTTTGGCCTCAAGTCATTGCGGTAAAGTGGCAGAGTGTAGACACAAATTTAGGCCTTCTGACTCC		AAGTGGCAGAGTGTAGACACAA		4.67168	1
mir-484	AGCCTCGTCAGGCTCAGTCCCCTCCCGATAAACCCCTAAATAGGGACTTTCCCGGGGGGTGACCCTGGCTTTTTTGGCG	TCAGGCTCAGTCCCCTCCCGAT		353.73		1
mir-485	ACTTGGAGAGAGGCTGGCCGTGATGAATTCGATTCATCAAAGCGAGTCATACACGGCTCTCCTCTCTTTTAGT	AGAGGCTGGCCGTGATGAATTC	GTCATACACGGCTCTCCTCTCT	160.831	47.3643	1
mir-486	GTATCCTGTACTGAGCTGCCCCGAGCTGGGCAGCATGAAGGGCCTCGGGGCAGCTCAGTACAGGATGC	TCCTGTACTGAGCTGCCCCGAG	CGGGGCAGCTCAGTACAGGAT	5382.29	199.131	1
mir-486-1	GCATCCTGTACTGAGCTGCCCCGAGGCCCTTCATGCTGCCCAGCTCGGGGCAGCTCAGTACAGGATAC	TCCTGTACTGAGCTGCCCCGAG	CGGGGCAGCTCAGTACAGGAT	7013.65	332.082	1
mir-487b	TTGGTACTTGGAGAGTGGTTATCCCTGTCCTGTTCGTTTTGCTCGTGTCGAATCGTACAGGGTCATCCACTTTTTCAGTATCAA	GTGGTTATCCCTGTCCTGTTCG	AATCGTACAGGGTCATCCACTT	0.500799	15.9482	1
mir-491	TTGACTTAGCTGGGTAGTGGGGAACCCTTCCATGAGGAGTAGAACACTCCTTATGCAAGATTCCCTTCTACCTGGCTGGGTTGG	AGTGGGGAACCCTTCCATGAGG		2.56914		1
mir-493	CTGGCCTCCAGGGCTTTGTACATGGTAGGCTTTCATTCATTCGTTTGCACATTCGGTGAAGGTCTACTGTGTGCCAGGCCCTGTGCCAG	TTGTACATGGTAGGCTTTCATT	TGAAGGTCTACTGTGTGCCAGG	105.941	79.4393	1
mir-494	GATACTCGAAGGAGAGGTTGTCCGTGTTGTCTTCTCTTTATTTATGATGAAACATACACGGGAAACCTCTTTTTTAGTATC		TGAAACATACACGGGAAACCTC		5.54383	1
mir-495	TGGTACCTGAAAAGAAGTTGCCCATGTTATTTTCGCTTTATATGTGACGAAACAAACATGGTGCACTTCTTTTTCGGTATCA		AAACAAACATGGTGCACTTCTT		54.8482	1
mir-496	CCCGAGTCAGGTACTCGAATGGAGGTTGTCCATGGTGTGTTCATTTTATTTATGATGAGTATTACATGGCCAATCTCCTTTCGGTACTCAATTCTTCTTGGG		TGAGTATTACATGGCCAATCTC		1.26888	1
mir-497	CCACCCCGGTCCTGCTCCCGCCCCAGCAGCACACTGTGGTTTGTACGGCACTGTGGCCACGTCCAAACCACACTGTGGTGTTAGAGCGAGGGTGGGGGAGGCACCGCCGAGG	CAGCAGCACACTGTGGTTTGT		0.697795		1
mir-499	GCCCTGTCCCCGTGTCTTGGGCGGGCAGCTGTTAAGACTTGCAGTGATGTTTAACTCCTCTCCACGTGAACATCACAGCAAGTCTGTGCTGCTTCCCGTCCCTACGCTGCCTGGGCAGGGT	TTAAGACTTGCAGTGATGTTT		42.3981		1
mir-4999	ACACATACTGCCGTATTGTCAGGTAGTGATAGGATTTATCACTACCTGACAATACAATATGTGTTTGTTT	GCCGTATTGTCAGGTAGTGATA	TCACTACCTGACAATACAATAT	1.40725	0.258464	1
mir-500a	GCTCCCCCTCTCTAATCCTTGCTACCTGGGTGAGAGTGCTGTCTGAATGCAATGCACCTGGGCAAGGATTCTGAGAGCGAGAGC		ATGCACCTGGGCAAGGATTCTG		140.318	1
mir-501	GCTCTTCCTCTCTAATCCTTTGTCCCTGGGTGAGAGTGCTTTCTGAATGCAGTGCACCCAGGCAAGGATTCTGAGAGGGTGAGC	AATCCTTTGTCCCTGGGTGAGA		4.11405		1
mir-502	CCCTCTCTAATCCTTGCTATCTGGGTGCTAGTGCTGTCTCAATGCAATGCACCTGGGCAAGGATTCAGAGAGGGGGAGCT	ATCCTTGCTATCTGGGTGCTA	AATGCACCTGGGCAAGGATTCA	2.90168	87.1809	1
mir-503	TGCCCTAGCAGCGGGAACAGTTCTGCAGTGAGCGATCGGTGCTCTGGGGTATTGTTTCCGCTGCCAGGGTA	TAGCAGCGGGAACAGTTCTGCAG	GGAGTATTGTTTCCGCTGCCAGG	98.3197	3.54985	1
mir-505	GATGCACCCAGTGGGGGAGCCAGGAAGTATTGATGTTTCTGCCAGTTTAGCGTCAACACTTGCTGGTTTCCTCTCTGGAGCATC	GGGGAGCCAGGAAGTATTGATGT	CGTCAACACTTGCTGGTTTCCT	56.0887	187.829	1
mir-511	CAATAGACACCCACCTTGTCTTTTGCTCTGCAGTCAGTAAATATTTTTTTGTGAATGTGTAGCAAAAGACAGAATGGGGGTCCATTG	TGTCTTTTGCTCTGCAGTCA		0.495485		1
mir-532	CGACTTGCTTTCTCTCCTCCATGCCTTGAGTGTAGGACCGTTGGCATCTTAATTACCCTCCCACACCCAAGGCTTGCAGAAGAGCGAGCCT	CATGCCTTGAGTGTAGGACCGT	CCTCCCACACCCAAGGCTTGCA	3240.6	16.1388	1
mir-539	ATACTTGAGGAGAAATTATCCTTGGTGTGTTCGCTTTATTTATGATGAATCATACAAGGACAATTTCTTTTTGAGTAT	GGAGAAATTATCCTTGGTGTGT	ATCATACAAGGACAATTTCTTT	1.17588	10.9154	1
mir-541	ACGTCAGGGAAAGGATTCTGCTGTCGGTCCCACTCCAAAGTGCATAGAATGGGTGGTGGGCACAGAATCCGGACTCTGCTTGTG		TGGTGGGCACAGAATCCGGACT		3.01129	1
mir-542	CAGACCTCAGACATCTCGGGGATCATCATGTCACGAGATACCACTGTGCACTTGTGACAGATTGATAACTGAAAGGTCTGGGAGCCATTCATCTTCA	TCGGGGATCATCATGTCACGAGA	TGTGACAGATTGATAACTGAAA	0.530249	31.1409	1
mir-543	GGTACTTAATGAGAAGTTGCCCGTGTCTTTTTCGCTTTATTTGTGACGAAACATTCGCGGTGCACTTCTTTTTCAGTATC		AAACATTCGCGGTGCACTTCTT		486.312	1
mir-544	ATTTTCATCACCTAGGGATCTTGTTAAAAAGCAGATTCTGATTCAGGGACCAAGATTCTGCATTTTTAGCAAGTTCTCAAGTGATGCTAAT		ATTCTGCATTTTTAGCAAGTTC		0.238463	1
mir-548ad	CTGTTAGGTTGGTGCAAAAGTAATTGTGGTTTTTGAAAGTAACTTGGCGAAAACGACAATGACTTTTGCACCAATCTAATAC	AAAAGTAATTGTGGTTTTTG		2.20457		1
mir-548aq	GAAAGTAATTGCTGTTTTTGCCATTACTTTCAGTGGCAAAAACTGCAATTACTTTTGC		CAAAAACTGCAATTACTTTTGC		34.4917	4
mir-548aq-b	ATTAGGTTGGTGCAAAAGTAATTGCAGTTTTTGCCATTACTTTCAGCGGCAAAAACTGCAATTACTTCTGCACCAACCTAA		CAAAAACTGCAATTACTTCTGC		1.08476	1
mir-548at	TAGGTTGGTGCAAAAGTTGTTGCGGTTTTGGCCGCCAAAAGAAATGGCCAAAACCGCAATAACTTTTGTACCAACCTAA	CAAAAGTTGTTGCGGTTTTGGC		1.3354		1
mir-548av	AAAAGTACTTGCGGATTTGCCATCACCTTTACCTTTAATGGCAAAACTGCAGTTACTTTTGC		AAAACTGCAGTTACTTTTGC		0.359007	1
mir-548ay	AGAAGATGCTTACTACTAGGTTGGTGCAAAAGTAATTGTGGTTTTTGCATTTAAAGTAATGGCCAAAACCGCGATTACTCTTGCACGAACCTAACGGTAACACTTCT	AAAAGTAATTGTGGTTTTTGC		3.98159		1
mir-548d-1	AAACAAGTTATATTAGGTTGGTGCAAAAGTAATTGTGGTTTTTGCCTGTAAAAGTAATGGCAAAAACCACAGTTTCTTTTGCACCAGACTAATAAAG	AAAAGTAATTGTGGTTTTTGCC		2.82901		1
mir-548i	AAAGGTCATTGCAGATTTTGCCATTACTTTTAGTGGCAAAATCGTCTATGACTTTTGC	AAAGGTCATTGCAGATTTTGCC	CAAAATCGTCTATGACTTTTGC	4.19709	1.71456	1
mir-548j	AAAAGTAATTGTGGGCTTTGCTATAGAAAGTAAAGGTAAAAACCGCAATTACTTTTGC	AAAAGTAATTGTGGGCTTTGC		1.43727		1
mir-548l	ATTAGGTTGGTGCAAAAGTATTTGCGGGTTTTGTCATTGAAAGTAATGGCAAAAACTGCAATTACTTCTGCACCAACCTAA		CAAAAACTGCAATTACTTCTGC		1.08476	1
mir-548u	ATTAGGATGGTGCAAAAGTAATGTGGTTTTTTTCTTTACTTTTAATGGCAAAGACTGCAATTACTTTTGCGCCAACCTAAT		CAAAGACTGCAATTACTTTTGCG		95.2086	1
mir-550	TGATGCTTTGCTGGCTGGTGCAGTGCCTGAGGGAGTAAGAGCCCTGTTGTTGTAAGATAGTGTCCTACTCCCTCAGGCACATCTCCAGCAAGT	AGTGCCTGAGGGAGTAAGAGCCC		9.95561		1
mir-551a	GGGGACTGCCGGGTGACCCTGGAAATCCAGAGTGGGTGGGGCCTGTCTGACCATTTCTAGGCGACCCACTCTTGGTTTCCAGGGTTGCCCTGGAAA		GCGACCCACTCTTGGTTTCCA		0.632607	1
mir-5690	CTTTTAATTTCAGCTACTACCTCTATTAGGATTTGGGAGTTATACTAATAGAGGTAATAGTTGAAATTAAGAG	TCAGCTACTACCTCTATTAGG		4.21102		1
mir-5697	AAGTAGTTTCATGATAAAGGGTGTGTGGGAGGTCAACCTTTTATCTGAAACTGCTTGA	AAGTAGTTTCATGATAAAGGGT	CTTTTATCTGAAACTGCTTGA	3.16632	0.446796	1
mir-5698	not found	TGGGGGAGTGCAGTGATTGTGG		0.734634
mir-574	GGGACCTGCGTGGGTGCGGGCGTGTGAGTGTGTGTGTGTGAGTGTGTGTCGCTCCGGGTCCACGCTCATGCACACACCCACACGCCCACACTCAGG	TGAGTGTGTGTGTGTGAGTGTGT	CACGCTCATGCACACACCCACA	111.974	24.9467	1
mir-576	TACAATCCAGTGAGGATTCTAATTTCTCCACATCTTTGGTAATAAGTTTTGGCAAAGATGTGGAAAAATTGGAATCCTCATTGGATTGGTTATAA	ATTCTAATTTCTCCACATCTTT	AAGATGTGGAAAAATTGGAATC	3.17814	12.5808	1
mir-581	GTTCTGTGAACGTATTCTTGTGTTCTGTAGATCAGTGCTTTTAGAAAATTTGTGTGATCTAGAGAACACAAAGAATACCTACACAGAACCATCTGC	TCTTGTGTTCTGTAGATCAGT		0.470447		1
mir-582	ATCTGTGCTCTTTGATTACAGTTGTTCAACCAGTTACTAATCTAACTAATTGTAACTGGTTGAACAACTGAACCCAAAGGGTGCAAAGTAGAAACATT	TTACAGTTGTTCAACCAGTTACT	TAACTGGTTGAACAACTGAACC	21.5897	216.056	1
mir-584	TAGGGTGACCAGCCATTATGGTTTGCCTGGGACTGAGGAATTTGCTGGGATATGTCAGTTCCAGGCCAACCAGGCTGGTTGGTTTCCCTGAAGCAAC	TTATGGTTTGCCTGGGACTGAG		121.708		1
mir-590	TAGCCAGTCAGAAATGAGCTTATTCATAAAAGTGCAGTATGGTGGAGTCAGTCTGTAATTTTATGTATAAGCTGGTCTCTAACTGAAACGTGCAGCA	GAGCTTATTCATAAAAGTGCAG	TAATTTTATGTATAAGCTGGT	0.402503	93.8759	1
mir-598	GCTTGATGATGCTGCTGATGCTGGCGGTGATCCCGATGGTGTGAGCTGGAAATGGGGTGCTACGTCATCGTTGTCATCGTCATCATCATCATCCGAG		TACGTCATCGTTGTCATCGTCA		28.1015	1
mir-599	AAAGACATGCTGTCCACAGTGTGTTTGATAAGCTGACATGGGACAGGGATTCTTTTCACTGTTGTGTCAGTTTATCAAACCCATACTTGGATGAC	TTTGATAAGCTGACATGGGACA		0.502187		1
mir-605	CCCTAGCTTGGTTCTAAATCCCACGGTGCCTTCTCCTTGGGAAAAACAGAGAAGGCACTGTGGGATTTAGAACCAAGTTAGG	TAAATCCCACGGTGCCTTCTCCT		56.5019		1
mir-610	TCTATTTGTCTTAGGTGAGCTAAATGTGTGCTGGGACACATTTGAGCCAAATGTCCCAGCACACATTTAGCTCACATAAGAAAAATGGACTCTAGT	TGAGCTAAATGTGTGCTGGGA		8.25857		1
mir-616	TTAGGTAATTCCTCCTCTCAAAACCCTCCAATGACTTCCCTGACATGACATAGGAAGTCACTGGAGAGTTTTGAGCAGAGGAATGACCTGTTTTAAAA	AAACCCTCCAATGACT		1.04589		1
mir-619	CGCCCACCTCAGCCTCCCAAAATGCTGGGATTACAGGCATGAGCCACTGCGGTCGACCATGACCTGGACATGTTTGTGCCCAGTACTGTCAGTTTGCAG	GCTGGGATTACAGGCATGAGCC		0.385598		1
mir-624	AATGCTGTTTCAAGGTAGTACCAGTATCTTGTGTTCAGTGGAACCAAGGTAAACACAAGATACTGGTATTACCTTGAGATAGCATTAACACCTAAGTG		CACAAGATACTGGTATTACCT		4.04952	1
mir-627	TACTTATTACCGGTAGTGAGTCTGTAAGAAAAGAGGAGGTGGTGGTTTTCCTCCTCTTTTCTTAGAGACTCACTACCAGTAATAAGAAATACTACTA	TGAGTCTGTAAGAAAAGAGGAG	TCCTCTTTTCTTAGAGACTCAC	103.451	0.581991	1
mir-628	ATAGCTGTTGTGTCACTTCCTCATGCTGACATATTTACTAGAGGGTAAAATTAATAACCTTCTAGTAAGAGTGGCAGTCGAAGGGAAGGGCTCAT	ATGCTGACATATTTACTAGAGG	TCTAGTAAGAGTGGCAGTCGA	69.8728	61.6461	1
mir-641	TGGGTGAAAGGAAGGAAAGACATAGGATAGAGTCACCTCTGTCCTCTGTCCTCTACCTATAGAGGTGACTGTCCTATGTCTTTCCTTCCTCTTACCCCT	AAAGACATAGGATAGAGTCACCTC		1.05781		1
mir-6501	GGAGTTGCCAGGGCTGCCTTTGGTGACAGCAGCAGTAGAGTTGCCAGAGCAGCCTGCGGTAACAGTA	AGTTGCCAGGGCTGCCTTTGGT		1.73617		1
mir-6503	TCCCCCAGGGAGGTCTGCGTTCTAATCCCCAGAAGCTAAGGATTAGGGGGACAAGGATGCAGACCTCCCTGGGGGACC	AGGTCTGCGTTCTAATCCCCA	GGGACAAGGATGCAGACCTCC	7.5816	18.5232	1
mir-6503-2	GGTCCCCGAGGGAGGTCTGCATTCTAATCCCCAGAAGCGAAGGATTAGGGGGACAAGGATGCAGACCTCCCTGGGGGACCC	GGAGGTCTGCATTCTAATC	GGGACAAGGATGCAGACCTCC	0.171816	12.6066	1
mir-6516	TGGGTTTTGAATTTGCAGTAACAGGTGTGAGCATTCTAGCAGCAGTTTGATGATCATGTATGATACTGCAAACAGGACCTA	TTTGCAGTAACAGGTGTGAGCA		0.321296		1
mir-652	ACGAATGGCTATGCACTGCACAACCCTAGGAGAGGGTGCCATTCACATAGACTATAATTGAATGGCGCCACTAGGGTTGTGCAGTGCACAACCTACAC		AATGGCGCCACTAGGGTTGTG		136.039	1
mir-6529	GAGAGATCAGAGGCGCAGAGTGCGTCAATGTCAATGAAGCCTGTGCCTTTTACCTCTTTAA	GAGAGATCAGAGGCGCAGAGT	CCTGTGCCTTTTACCTCTTTAA	1940.61	59.2734	1
mir-654	GGGTAAGTGGAAAGATGGTGGGCCGCAGAACATGTGCTGAGTTCGTGCCATATGTCTGCTGACCATCACCTTTAGAAGCCC	TGGTGGGCCGCAGAACATGTGC	TATGTCTGCTGACCATCACCTT	165.589	188.771	1
mir-655	AACTATGCAAGGATATTTGAGGAGAGGTTATCCGTGTTATGTTCGCTTCATTCATCATGAATAATACATGGTTAACCTCTTTTTGAATATCAGACTC		ATAATACATGGTTAACCTCTTT		2.34685	1
mir-656	CTGAAATAGGTTGTCTGTGAGGTGTTCACTTTCTATATGATGAATATTATACAGTCAACCTCTTTCCGATATCGAATC		AATATTATACAGTCAACCTCT		17.4942	1
mir-660	CTGCTCCTTCTCCCATACCCATTGCATATCGGAGTTGTGAATTCTCAAAACACCTCCTGTGTGCATGGATTACAGGAGGGTGAGCCTTGTCATCGTG	TACCCATTGCATATCGGAGTTG	ACCTCCTGTGTGCATGGATTA	280.477	5.53403	1
mir-664	GAACATTGAAACTGGCTAGGGAAAATGATTGGATAGAAACTATTATTCTATTCATTTATCCCCAGCCTACAAAATGAAAAAA	ACTGGCTAGGGAAAATGATTGGAT	TATTCATTTATCCCCAGCCTA	87.4473	1.50559	1
mir-668	GGTAAGTGCGCCTCGGGTGAGCATGCACTTAATGTGGGTGTATGTCACTCGGCTCGGCCCACTACC		TGTCACTCGGCTCGGCCCACTAC		1.14323	1
mir-671	GCAGGTGAACTGGCAGGCCAGGAAGAGGAGGAAGCCCTGGAGGGGCTGGAGGTGATGGATGTTTTCCTCCGGTTCTCAGGGCTCCACCTCTTTCGGGCCGTAGAGCCAGGGCTGGTGC	AGGAAGCCCTGGAGGGGCTGGAG	TCCGGTTCTCAGGGCTCCACC	7.17348	63.2007	1
mir-6731	ACAGGTGGGAGAGCAGGGTATTGTGGAAGCTCCAGGTGCCAACCACCTGCCTCTATTCCCCACTCTCCCCAG	TGGGAGAGCAGGGTATTGTGGA		1.20042		1
mir-6735	ACTGGCAGCCAGGGCAGAGAGCACAGGAATCTGAGGTGACTGGCACAGAAGACTCAGGCCTGTGGCTCCTCCCCCAGGACTGCTTCC	AGGGCAGAGAGCACAGGAATCTGA	AGGCCTGTGGCTCCTCCCCCAG	1.14339	0.0859082	1
mir-6790	AGTGAGTGTGGATTTGGCGGGGTTCCGGGGTCCCGACGGCGACCTCGGCAACTCCTCACTCACCGT		TCGGCAACTCCTCACTCACCGT		2.72061	1
mir-6813	GTAGGCAGGGGCTGGGGTTTCAGGTTCTCAGTCAGAACCTTGGCCCCTCTCCCCAG	CAGGGGCTGGGGTTTCAGGTTCT		0.692177		1
mir-6816	AGGAGCCCGAGTGGGGCGGGGTGGGTCCCTGCAGGGACTGTGACACTGAAGGACCTGCACCTCCGCCCACAGAAAGACTCCC		GAAGGACCTGCACCTCCGCCCACA		0.818468	1
mir-6827	GTGGGAACCATAAGGGTCTGTGCTGTCTCTGAGCACCGTCTCTTCTGTTTCCCAGGATCC	GTGGGAACCATAAGGGTCTGTGC	ACCGTCTCTTCTGTTTCCCAGGATCC	13.0305	0.442139	1
mir-6866	AGTCCTCCATTTTAGAGGCTGGAATAGGGATTATTGAGTCTGGAAGAGTAAGGATCCCTTTATCTGTCCTCTAGGAGAGCACAGAACCTGTGGAGAACA	TTAGAGGCTGGAATAGGGATT		0.689236		1
mir-708	AACTGCCCTCAAGGAGCTTACAATCTAGCTGGGGGTAAATGACTTGCACATGAACACAACTAGACTGTGAGCTTCTAGAGGGCAGGGA	AAGGAGCTTACAATCTAGCTGGG	CAACTAGACTGTGAGCTTCTAGA	3.48866	0.375135	1
mir-7-1	TTGGATGTTGGCCTAGTTCTGTGTGGAAGACTAGTGATTTTGTTGTTTTTAGATAACTAAATCGACAACAAATCACAGTCTGCCATATGGCACAGGCCATGCCTCTACAG	TGGAAGACTAGTGATTTTGTTGT	CAACAAATCACAGTCTGCCATA	2760.23	17.1935	3
mir-7155	TCTGGGGTCTTGGGCCATCTGGTTGTGACATCACTGATGGCCCAAGACCTCAGACC		TGGCCCAAGACCTCAGACC		0.681526	1
mir-7172	AGGCCTCTCAGGGTTTCTGGATGTGTGTGTGTTCCATAAACCCTCAGAGAGTCACC	AGGCCTCTCAGGGTTTCTGG		17.1627		1
mir-7174	AGGAGTGACAGAGTTAGACTCTTTTTTTTTTTTTGAGACAGAGTCTCGCTCTGTCAGTCAGGC	AGGAGTGACAGAGTTAGACTCT		0.488858		1
mir-7180	AGTGTACTTCCTGAGGCCTCTGGGTATAAAATTCCTGTGGCCTCTGGGTGTGTACCCT	AGTGTACTTCCTGAGGCCTCT	TGGCCTCTGGGTGTGTACCCT	30.9391	27.595	1
mir-7184	ACCCAGCATCGTCAGGGGCCAGGCCAAATGCTCAGTGAGTGTCTGCTCTGCACCTGAGCCTTCTGCTGGACCCGTGATGAACTGTGGC	AGGGGCCAGGCCAAATGCTCAGT	TGAGCCTTCTGCTGGACCCGTGAT	0.518479	7.43635	1
mir-7186	GGGATCTGGCACTGTGGTTCCTGTATGAAGACAGTAGCGGTGTCTTCATGCAGGAACCACATTGTCTGGACCTA	ACTGTGGTTCCTGTATGAAGAC	TCTTCATGCAGGAACCACATTG	255.504	7.24147	1
mir-7189	CCGTGCTGCCAGAGCGCATGACGGAGCCCTCTTGGTCATGTTCTCTCGCAGCTCTGGA	CCGTGCTGCCAGAGCGCATGAC	CATGTTCTCTCGCAGCTCTGGA	0.383717	0.987538	1
mir-7192	TCACTCAGAATTAAAAAACAATAACTGTGGTCTGTCAAGGTGACATTGTTTTTTATTCTGAGTGACA		TTGTTTTTTATTCTGAGTGACA		1.47649	1
mir-7194	TTGAAATGCAGAGTCTGATCCAGTAAGTCTAGAATCCTGCCTCAGATTCTGGATTCCTACC	TTGAAATGCAGAGTCTGATCC	CTCAGATTCTGGATTCCTACC	0.461536	0.494993	1
mir-7202	TTGGGTGACATTTGTAGATGTCTCTGTATCTTGACATTTACACGTGTCGCTCGGGA	TTGGGTGACATTTGTAGATGT		7.23403		1
mir-7204	TTGGACTTTGGTGCTACCATAAAGGAATATATACTTACGATAACACCCAAGTCCGAAT	TTGGACTTTGGTGCTACCATA	CGATAACACCCAAGTCCGAAT	10.7761	0.898361	1
mir-7205	CAGGCCCGGGGCTCGAGGGGCGTCGGGGCCAGGGAAGCTTTCAATACCGCTCTCTGACACACGCCCTCCTGCTCTGGGACCCG	TCGAGGGGCGTCGGGGCCAGGGAAG	TCTCTGACACACGCCCTCCTGC	0.565101	3.94092	1
mir-7206	CATAAACCCATCGTGAGTTGAAAATATCCTAAGTCGAAAGTGCATTTACAACTTAGGATATTTTCAACTCATGATGGGTTTATGCACA	TCGTGAGTTGAAAATATCCT	TAGGATATTTTCAACTCATGATG	0.775391	61.4872	1
mir-744	TTGGGCAAGGTGCGGGGCTAGGGCTAACAGCAGTCTTACTGAAGGTTTCCTGGAAACCACGCACATGCTGTTGCCACTAACCTCAACCTTACTCGGTC	TGCGGGGCTAGGGCTAACAGCA	CTGTTGCCACTAACCTCAACCT	1140.67	1.70746	1
mir-758	GCCTGGATACGTGAGATGGTTGACCAGAGAGCACACGCTTTATATGTGCCGTTTGTGACCTGGTCCACTACCCCTCAGTATCTAATGC		TTTGTGACCTGGTCCACTACCC		4.10513	1
mir-760	GGCGCGTCGCCCCCCTCAGTCCACCAGAGCCCGGATACCTCAGAAATTCGGCTCTGGGTCTGTGGGGAGCGAAATGCAAC		CGGCTCTGGGTCTGTGGGGA		17.6082	1
mir-769	GCCTTGGTGCTGATTCCTGGGCTCTGACCTGAGACCTCTGGGTTCTGAGCTGTGATGTTGCTCTCGAGCTGGGATCTCCGGGGTCTTGGTTCAGGGCCGGGGCCTCTGGGTTCCAAGC	TGAGACCTCTGGGTTCTGAGCT	CTGGGATCTCCGGGGTCTTGGTT	42.8889	0.347156	1
mir-7848	GCTGGGGCTGGGTGGGTGTGGCAGGCCCACCTTGGGTATGCAAAGCTCTGACAGTGTTTCACTTGCTACCCTCGGTCTGCTTACCACACTCCCAGTTCTGC		CTACCCTCGGTCTGCTTACCACA		18.2255	1
mir-874	TTAGCCCTGCGGCCCCACGCACCAGGGTAAGAGAGAGTCTCGCTTCCTGCCCTGGCCCGAGGGACCGACTGGCTGGGC		CTGCCCTGGCCCGAGGGACCGA		15.6739	1
mir-877	GTAGAGGAGATGGCGCAGGGGACACGGGCAAAGACTTGGGGGTTCCTGGGACCCTCAGACGTGTGTCCTCTTCTCCCTCCTCCCAG	GTAGAGGAGATGGCGCAGGG		2.72887		1
mir-889	GTGCTTAAAGAATGGCTGTCCGTAGTATGGTCTCTATATTTATGATGATTAATATCGGACAACCATTGTTTTAGTATCC	AATGGCTGTCCGTAGTATGGTC	TTAATATCGGACAACCATTGT	0.536958	118.279	1
mir-9-1	CGGGGTTGGTTGTTATCTTTGGTTATCTAGCTGTATGAGTGGTGTGGAGTCTTCATAAAGCTAGATAACCGAAAGTAAAAATAACCCCA	TCTTTGGTTATCTAGCTGTATGA	ATAAAGCTAGATAACCGAAAGT	155.952	26.2131	3
mir-92a-1	CTTTCTACACAGGTTGGGATCGGTTGCAATGCTGTGTTTCTGTATGGTATTGCACTTGTCCCGGCCTGTTGAGTTTGG	AGGTTGGGATCGGTTGCAATGCT	TATTGCACTTGTCCCGGCCTGT	35.5209	8940.18	1
mir-92a-2	TCATCCCTGGGTGGGGATTTGTTGCATTACTTGTGTTCTATATAAAGTATTGCACTTGTCCCGGCCTGTGGAAGA	GGGTGGGGATTTGTTGCATTAC		0.379061		1
mir-92b	CGGGCCCCGGGCGGGCGGGAGGGACGGGACGCGGTGCAGTGTTGTTCTTTCCCCCGCCAATATTGCACTCGTCCCGGCCTCCGGCCCCCCCGGCCC	AGGGACGGGACGCGGTGCAGTGTT	TATTGCACTCGTCCCGGCCTCC	13.0681	37.0474	1
mir-93	CTGGGGGCTCCAAAGTGCTGTTCGTGCAGGTAGTGTGATTAACCGACCTACTGCTGAGCTAGCACTTCCCGAGCCCCCAG	AAAGTGCTGTTCGTGCAGGTAG	ACTGCTGAGCTAGCACTTCCCG	1472.75	13.8181	1
mir-933	ACTTGGGTCAGTTCAGAGGTCCTCGGGGCGCGCGTCGAGTCAGCCGTGTGCGCAGGGAGACCTCTCCCACCCACAGT		TGTGCGCAGGGAGACCTCTCCC		0.66166	1
mir-935	GGCGGGGGCGCGGGCGGCAGTGGCGGGAGCGGCCCCTCGGCCATCCTCCGTCTGCCCAGTTACCGCTTCCGCTACCGCCGCCGCTCCCGCT		CCAGTTACCGCTTCCGCTACCGC		1.44328	1
mir-939	TGTGGGCAGGGCCCTGGGGAGCTGAGGCTCTGGGGGTGGCCGGGGCTGACCCTGGGCCTCTGCTCCCCAGTGTCTGACCGCG	TGGGGAGCTGAGGCTCTGGGGGTG		0.852119		1
mir-940	GTGGGGTGTGGGCCCGGCCCCAGGAGCGGGGCCTGGGCAGCCCCGTGTGTTGAGGAAGGAAGGCAGGGCCCCCGCTCCCCGGGCCTGACCCCAC		AAGGCAGGGCCCCCGCTCCCC		0.559653	1
mir-942	ATTAAGAGAGTACCTTCTCTGTTTTGGCCATGTGTGTACTCACAGCCCCTCACACGTGGCCGAAACAGAGAAGGTACTTTCCTAAT	CTTCTCTGTTTTGGCCATGTG		219.057		1
mir-95	AACACAGTGGGCACTCAATAAATGTCTGTTGAATTGAAATGCGTTACATTCAACGGGTATTTATTGAGCACCCACTCTGTG		TTCAACGGGTATTTATTGAGCA		35.7169	1
mir-96	TGGCCGATTTTGGCACTAGCACATTTTTGCTTGTGTCTCTCCGCTCTGAGCAATCATGTGCAGTGCCAATATGGGAAA	TTTGGCACTAGCACATTTTTGCT		2.41		1
mir-98	AGGATTCTGCTCATGCCAGGGTGAGGTAGTAAGTTGTATTGTTGTGGGGTAGGGATATTAGGCCCCAATTAGAAGATAACTATACAACTTACTACTTTCCCTGGTGTGTGGCATATTCA	TGAGGTAGTAAGTTGTATTGTT	CTATACAACTTACTACTTTCCC	698.517	0.606761	1
mir-99a	CCCATTGGCATAAACCCGTAGATCCGATCTTGTGGTGAAGTGGACCGCACAAGCTCGCTTCTATGGGTCTGTGTCAGTGTG	AACCCGTAGATCCGATCTTGTG		333.357		1
mir-99b	GGCACCCACCCGTAGAACCGACCTTGCGGGGCCTTCGCCGCACACAAGCTCGTGTCTGTGGGTCCGTGTC	CACCCGTAGAACCGACCTTGCG	AAGCTCGTGTCTGTGGGTCCG	242.338	1.16996	1
º: single underlines means that the sRNA read perfectly matched the mature miRNA sequence deposied in miRBase, while the relavent pre-miRNA sequence did not found in cynomolgus macaque genome;
Average expression levels for each mature miRNA were normalized by transcripts per million.
