# Supplementary material for: Analysis of conserved miRNAs in cynomolgus macaque genome using small RNA sequencing and homology searching
Source: PeerJ. 2020 Jul 10;8:e9347. doi: 10.7717/peerj.9347 (PMC7357559; doi:10.7717/peerj.9347)
Supplement: Supplemental Information 4 — °: The same pathways that targets of miR-24-1 and miR-3074 contributed to are marked by underscore. [file peerj-08-9347-s004.xlsx]

## Sheet: Supplemental Table S4
Supplemental Table S4. KEGG analysis of mirror miRNA pair, miR-24-1/miR-3074 in cynomolgus macaque
miRNAs	Passway Description º	p.adjust
miR-24-3p	Axon guidance	0.00510235
	Cushing syndrome	0.00510235
	EGFR tyrosine kinase inhibitor resistance	0.041089
	Wnt signaling pathway	0.041089
miR-3074-5p	MAPK signaling pathway	1.86598e-05
	Colorectal cancer	0.000129123
	Herpes simplex virus 1 infection	0.000129123
	Osteoclast differentiation	0.000260359
	EGFR tyrosine kinase inhibitor resistance	0.000260359
	Axon guidance	0.000442392
	Ras signaling pathway	0.000576535
	ErbB signaling pathway	0.000576535
	Melanoma	0.000624322
	Signaling pathways regulating pluripotency of stem cells	0.00132874
	Proteoglycans in cancer	0.00132874
	Glioma	0.00144151
	Non-small cell lung cancer	0.0026823
	Gastric cancer	0.00387717
	Hepatitis B	0.00425699
	Breast cancer	0.00425699
	cAMP signaling pathway	0.00698937
	Phosphatidylinositol signaling system	0.00698937
	Rap1 signaling pathway	0.00698937
	Pancreatic cancer	0.00698937
	Chronic myeloid leukemia	0.00698937
	Hippo signaling pathway	0.00698937
	AGE-RAGE signaling pathway in diabetic complications	0.00775262
	Autophagy - animal	0.00863142
	PD-L1 expression and PD-1 checkpoint pathway in cancer	0.00863142
	Neurotrophin signaling pathway	0.00863142
	Kaposi sarcoma-associated herpesvirus infection	0.0109737
	Focal adhesion	0.0109737
	Apoptosis	0.0109737
	PI3K-Akt signaling pathway	0.0118361
	Inositol phosphate metabolism	0.0140571
	Melanogenesis	0.0140571
	Endocrine resistance	0.0140571
	Prolactin signaling pathway	0.0211365
	TGF-beta signaling pathway	0.0211365
	Sphingolipid signaling pathway	0.0211614
	Growth hormone synthesis, secretion and action	0.0211614
	Wnt signaling pathway	0.0211614
	Measles	0.0211614
	Transcriptional misregulation in cancer	0.0211614
	VEGF signaling pathway	0.0212452
	Phospholipase D signaling pathway	0.0217407
	AMPK signaling pathway	0.0226971
	Cholinergic synapse	0.028197
	FoxO signaling pathway	0.028197
	Dopaminergic synapse	0.028197
	Parathyroid hormone synthesis, secretion and action	0.0282049
	Thyroid hormone signaling pathway	0.0302429
	Endometrial cancer	0.0303924
	GnRH secretion	0.0305813
	Relaxin signaling pathway	0.0311645
	GABAergic synapse	0.0350833
	Longevity regulating pathway - multiple species	0.0369583
	TNF signaling pathway	0.0419005
	Prostate cancer	0.0471937
	Hepatocellular carcinoma	0.0485913
º: The same pathways that targets of miR-24-1 and miR-3074 contributed to are marked by underscore.
